# Supplementary material
Source: PubMed Central journal article supplement (PMC8675142)

# SUPPLEMENTAL INFORMATION

## Title: Herpesviruses assimilate kinesin to produce motorized viral particles

Caitlin E. Pegg<sup>1†</sup>, Sofia V. Zaichick<sup>1A†</sup>, Ewa Bomba-Warczak<sup>2</sup>, Vladimir Jovasevic<sup>1B</sup>, DongHo Kim<sup>1</sup>, Himanshu Kharkwal<sup>3C</sup>, Duncan W. Wilson<sup>3,4</sup>, Derek Walsh<sup>1</sup>, Patricia J. Sollars<sup>5</sup>, Gary E. Pickard<sup>5,6</sup>, Jeffrey N. Savas<sup>2</sup>, and Gregory A. Smith<sup>1\*</sup>

### Affiliations:

<sup>1</sup> Department of Microbiology-Immunology, Northwestern University Feinberg School of Medicine, Chicago IL, 60611, USA.

<sup>2</sup> Department of Neurology, Northwestern University Feinberg School of Medicine, Chicago IL, 60611, USA.

<sup>3</sup> Department of Developmental and Molecular Biology, Albert Einstein College of Medicine, Bronx NY, 10461, USA.

<sup>4</sup> Dominick P. Purpura Department of Neuroscience, Albert Einstein College of Medicine, Bronx NY, 10461, USA

<sup>5</sup> School of Veterinary Medicine and Biomedical Sciences, University of Nebraska-Lincoln, Lincoln NE, 68583, USA.

<sup>6</sup> Department of Ophthalmology and Visual Sciences, University of Nebraska Medical Center, Omaha NE, 68198, USA.

<sup>A</sup> Current Address: Gene Therapy Program, Department of Pathology and Laboratory Medicine, University of Pennsylvania Perelman School of Medicine, Philadelphia PA, 19104, USA.

<sup>B</sup> Current Address: Department of Pharmacology, Northwestern University Feinberg School of Medicine, Chicago IL, 60611, USA.

<sup>C</sup> Current Address: Agenus Inc., Lexington MA, 02421, USA.

\*Correspondence to: Gregory A. Smith, [g-smith3@northwestern.edu](mailto:g-smith3@northwestern.edu)

†Equal contributions.

## **Supplementary Information Table of Contents**

**Page 1:** Supplemental Information Cover Page

**Page 2:** Supplemental Information Table of Contents

**Page 3:** Supplemental Data 1

**Page 4:** Supplemental Data 2

**Page 5:** Description of Supplemental Data 3 (see Excel file)

Description of Supplemental Data 4 (see Excel file)

Descriptions of Supplemental Videos 1 & 2 (see two movie files)

**Pages 6 onward:** Supplemental Figure 1



**BALB/c mouse body weight following intranasal challenge with HSV-1 strain McKrae (5 µl/nostri)**

| HSV-1 McKrae produced on <b>WT</b> RPE cells (2.2x10e7 PFU/ml stock) |           |           |           |           |           | HSV-1 McKrae produced on <b>ΔKIF5B</b> RPE cells (3.7x10e7 PFU/ml stock) |           |           |           |           |            |
|----------------------------------------------------------------------|-----------|-----------|-----------|-----------|-----------|--------------------------------------------------------------------------|-----------|-----------|-----------|-----------|------------|
|                                                                      | animal #1 | animal #2 | animal #3 | animal #4 | animal #5 |                                                                          | animal #6 | animal #7 | animal #8 | animal #9 | animal #10 |
| <b>day 0*</b>                                                        | 20.24     | 22.14     | 18.06     | 17.46     | 18.83     | <b>day 0*</b>                                                            | 19.96     | 19.90     | 19.38     | 20.41     | 21.41      |
| <b>day 1</b>                                                         | 20.77     | 22.70     | 19.07     | 17.96     | 19.75     | <b>day 1</b>                                                             | 20.79     | 19.99     | 20.14     | 20.98     | 21.53      |
| <b>day 2</b>                                                         | 20.51     | 22.49     | 19.17     | 18.19     | 19.69     | <b>day 2</b>                                                             | 20.87     | 19.99     | 20.31     | 21.65     | 21.69      |
| <b>day 3</b>                                                         | 20.34     | 22.55     | 18.56     | 18.20     | 19.80     | <b>day 3</b>                                                             | 21.28     | 20.40     | 20.89     | 21.76     | 21.79      |
| <b>day 4</b>                                                         | 19.89     | 22.36     | 18.36     | 17.44     | 18.06     | <b>day 4</b>                                                             | 21.30     | 20.54     | 21.00     | 22.14     | 22.13      |
| <b>day 5</b>                                                         | 17.72     | 19.88     | 15.74     | 15.17     | 15.85     | <b>day 5</b>                                                             | 21.37     | 20.37     | 20.88     | 22.31     | 22.27      |
| <b>day 6</b>                                                         | 16.59     | 17.50     | x         | 13.86     | x         | <b>day 6</b>                                                             | 21.70     | 20.80     | 21.15     | 22.37     | 22.34      |
| <b>day 7</b>                                                         | 16.10     | 16.64     |           | x         |           | <b>day 7</b>                                                             | 21.95     | 21.18     | 21.25     | 22.72     | 22.73      |
| <b>day 8</b>                                                         | x         | 16.03     |           |           |           | <b>day 8</b>                                                             | 22.04     | 21.44     | 21.36     | 22.85     | 23.07      |
| <b>day 9</b>                                                         |           | x         |           |           |           | <b>day 9</b>                                                             | 22.12     | 21.55     | 21.29     | 23.10     | 23.06      |
| <b>day 10</b>                                                        |           |           |           |           |           | <b>day 10</b>                                                            | 22.05     | 21.49     | 21.02     | 23.23     | 23.02      |
| <b>day 11</b>                                                        |           |           |           |           |           | <b>day 11</b>                                                            | 22.16     | 21.46     | 20.98     | 23.35     | 23.14      |
| <b>day 12</b>                                                        |           |           |           |           |           | <b>day 12</b>                                                            | 22.40     | 21.76     | 21.31     | 23.61     | 23.26      |
| <b>day 13</b>                                                        |           |           |           |           |           | <b>day 13</b>                                                            | 22.14     | 21.75     | 21.14     | 23.55     | 23.31      |
| <b>day 14</b>                                                        |           |           |           |           |           | <b>day 14</b>                                                            | 22.34     | 21.91     | 21.41     | 23.87     | 23.58      |
| <b>day 15</b>                                                        |           |           |           |           |           | <b>day 15</b>                                                            | 22.34     | 22.05     | 21.53     | 23.84     | 23.48      |
| <b>day 16</b>                                                        |           |           |           |           |           | <b>day 16</b>                                                            | 22.29     | 21.95     | 21.40     | 23.50     | 23.11      |
| <b>day 17</b>                                                        |           |           |           |           |           | <b>day 17</b>                                                            | 22.82     | 22.30     | 21.61     | 24.10     | 23.28      |
| <b>day 18</b>                                                        |           |           |           |           |           | <b>day 18</b>                                                            | 23.06     | 22.45     | 21.70     | 24.19     | 23.75      |
| <b>day 19</b>                                                        |           |           |           |           |           | <b>day 19</b>                                                            | 22.78     | 22.62     | 21.61     | 24.09     | 23.72      |
| <b>day 20</b>                                                        |           |           |           |           |           | <b>day 20</b>                                                            | 22.91     | 22.57     | 21.39     | 23.32     | 23.01      |
| <b>day 21</b>                                                        |           |           |           |           |           | <b>day 21</b>                                                            | 23.13     | 23.10     | 21.69     | 24.58     | 23.90      |
| <b>TOD:</b>                                                          | 171 h     | 192 h     | 120 h     | 157 h     | 123 h     | <b>TOD:</b>                                                              | -         | -         | -         | -         | -          |

**Supplemental Data 1** Data supporting Figure 2C. (\*Mice were 53 days old on day 0)

| Identified Protein                                                | Gene name    | MW  | Spectral Count | Peptide Count | Sequence Coverage | NSAF    | empAI | PE | SV | Accession Numbers                                 |
|-------------------------------------------------------------------|--------------|-----|----------------|---------------|-------------------|---------|-------|----|----|---------------------------------------------------|
| Alpha-actinin-4                                                   | ACTN4        | 105 | 171            | 54            | 52.9%             | 0.02509 | 2.381 | 1  | 2  | Q43707                                            |
| Vinculin                                                          | VCL          | 124 | 162            | 47            | 47.7%             | 0.02031 | 1.999 | 1  | 4  | P18206-2 P18206                                   |
| Alpha-actinin-1                                                   | ACTN1        | 103 | 148            | 44            | 52.8%             | 0.02230 | 2.373 | 1  | 2  | P12814-2 P12814 P12814-4 P12814-3                 |
| Importin-5                                                        | IPOS         | 123 | 56             | 28            | 32.9%             | 0.00671 | 1.133 | 1  | 4  | O00410-3 O00410                                   |
| Integrin beta-1                                                   | ITGB1        | 86  | 54             | 19            | 27.2%             | 0.00904 | 0.871 | 1  | 2  | P05556                                            |
| ATP-citrate synthase                                              | ACLY         | 121 | 52             | 26            | 29.8%             | 0.00637 | 0.986 | 1  | 3  | P53396-2 P53396                                   |
| <b>Kinesin-1 heavy chain</b>                                      | <b>KIF5B</b> | 110 | 50             | 20            | 25.8%             | 0.00694 | 0.811 | 1  | 1  | P33176                                            |
| Heterogeneous nuclear ribonucleoprotein U                         | HNRNPU       | 90  | 43             | 13            | 24.4%             | 0.00713 | 0.754 | 1  | 6  | Q00839-2 Q00839                                   |
| Heat shock 70 kDa protein 4                                       | HSPA4        | 94  | 42             | 21            | 39.0%             | 0.00668 | 1.455 | 1  | 4  | P34932                                            |
| C-1-tetrahydrofolate synthase, cytoplasmic                        | MTHFD1       | 102 | 40             | 16            | 20.1%             | 0.00572 | 0.589 | 1  | 3  | P11586                                            |
| Heat shock protein 105 kDa                                        | HSPH1        | 97  | 40             | 20            | 25.9%             | 0.00657 | 0.816 | 2  | 1  | Q92598-2 B4DYH1 Q92598 Q92598-3                   |
| Neutral alpha-glucosidase AB                                      | GANAB        | 104 | 36             | 18            | 26.9%             | 0.00498 | 0.858 | 1  | 3  | Q14697-2 Q14697                                   |
| Transcription intermediary factor 1-beta                          | TRIM28       | 88  | 35             | 18            | 42.6%             | 0.00560 | 1.667 | 1  | 5  | Q13263                                            |
| Exportin-1                                                        | XPO1         | 123 | 33             | 16            | 21.6%             | 0.00412 | 0.644 | 1  | 1  | O14980                                            |
| Endoplasmic                                                       | HSP90B1      | 90  | 32             | 16            | 23.8%             | 0.00533 | 0.730 | 1  | 1  | P14625                                            |
| Unconventional myosin-1c                                          | MYO1C        | 122 | 31             | 17            | 22.4%             | 0.00397 | 0.675 | 2  | 1  | O00159-3 F5H6E2 O00159                            |
| Alanine-tRNA ligase, cytoplasmic                                  | AARS         | 107 | 30             | 16            | 19.6%             | 0.00414 | 0.570 | 1  | 2  | P49588                                            |
| Staphylococcal nuclease domain-containing protein 1               | SND1         | 102 | 30             | 14            | 21.0%             | 0.00441 | 0.622 | 1  | 1  | Q7KZ4                                             |
| Exportin-2                                                        | CSE1L        | 110 | 26             | 17            | 25.5%             | 0.00368 | 0.799 | 1  | 3  | P55060-3 P55060                                   |
| Elongation factor 2                                               | EEF2         | 95  | 25             | 14            | 27.0%             | 0.00389 | 0.862 | 1  | 4  | P13639                                            |
| Methionine-tRNA ligase, cytoplasmic                               | MARS         | 101 | 24             | 11            | 19.7%             | 0.00356 | 0.574 | 1  | 2  | P56192                                            |
| Hexokinase-1                                                      | HK1          | 102 | 22             | 15            | 18.2%             | 0.00321 | 0.521 | 2  | 1  | P19367-2 E7ENR4 P19367 P19367-4 P19367-3          |
| Heat shock protein HSP90-alpha                                    | HSP90AA1     | 85  | 21             | 10            | 15.1%             | 0.00329 | 0.416 | 1  | 5  | P07900-2 P07900                                   |
| Matrin-3                                                          | MATR3        | 94  | 21             | 12            | 18.5%             | 0.00331 | 0.531 | 1  | 2  | P43243 A8MXP9                                     |
| Protein transport protein Sec24C                                  | SEC24C       | 118 | 20             | 11            | 15.1%             | 0.00244 | 0.416 | 1  | 3  | P53992 G5EA31 E7EP00                              |
| Major vault protein                                               | MVP          | 99  | 20             | 13            | 22.2%             | 0.00299 | 0.667 | 1  | 4  | Q14764                                            |
| Trifunctional purine biosynthetic protein adenosine-3             | GART         | 108 | 18             | 11            | 19.6%             | 0.00238 | 0.570 | 1  | 1  | P22102                                            |
| Poly [ADP-ribose] polymerase 1                                    | PARP1        | 113 | 17             | 11            | 17.8%             | 0.00224 | 0.507 | 1  | 4  | P09874                                            |
| Interleukin enhancer-binding factor 3                             | ILF3         | 95  | 17             | 9             | 19.3%             | 0.00253 | 0.560 | 1  | 3  | Q12906-7 Q12906                                   |
| Transitional endoplasmic reticulum ATPase                         | VCP          | 89  | 15             | 9             | 14.4%             | 0.00249 | 0.393 | 1  | 4  | P55072                                            |
| 116 kDa U5 small nuclear ribonucleoprotein component              | EFTUD2       | 109 | 15             | 10            | 16.0%             | 0.00214 | 0.445 | 2  | 1  | Q15029-2 K7EJ81 Q15029                            |
| Eukaryotic translation initiation factor 3 subunit C-like protein | EIF3CL       | 105 | 14             | 10            | 11.7%             | 0.00205 | 0.309 | 3  | 1  | B5ME19 H3BRV0 Q99613                              |
| Importin-7                                                        | IPO7         | 120 | 14             | 10            | 12.6%             | 0.00180 | 0.337 | 1  | 1  | O95373                                            |
| Puromycin-sensitive aminopeptidase                                | NPEPPS       | 103 | 14             | 6             | 7.4%              | 0.00204 | 0.186 | 1  | 2  | P55786 E9PLK3                                     |
| AP-2 complex subunit beta                                         | AP2B1        | 104 | 14             | 11            | 13.5%             | 0.00197 | 0.365 | 2  | 1  | P63010-2 K7EJ8 P63010 P63010-3                    |
| Hepatocyte growth factor-regulated tyrosine kinase substrate      | HGS          | 86  | 12             | 5             | 11.6%             | 0.00232 | 0.306 | 1  | 1  | O14964-2 Q14964                                   |
| Catenin alpha-1                                                   | CTNNA1       | 100 | 12             | 9             | 14.5%             | 0.00177 | 0.396 | 1  | 1  | P35221 F8W845                                     |
| AP-1 complex subunit beta-1                                       | AP1B1        | 105 | 12             | 9             | 10.6%             | 0.00170 | 0.276 | 1  | 2  | Q10567-2 Q10567 Q10567-4 Q10567-3                 |
| 26S proteasome non-ATPase regulatory subunit 1                    | PSMD1        | 106 | 12             | 8             | 15.6%             | 0.00174 | 0.432 | 1  | 2  | Q99460-2 Q99460                                   |
| AP-2 complex subunit alpha-1                                      | AP2A1        | 108 | 11             | 11            | 15.7%             | 0.00154 | 0.435 | 1  | 3  | Q95782-2 Q95782                                   |
| Lon protease homolog, mitochondrial                               | LONP1        | 99  | 11             | 8             | 15.3%             | 0.00167 | 0.422 | 1  | 2  | P36776 Q8N8X8 K7EKE6 K7EJE8 F5G227                |
| Splicing factor 3A subunit 1                                      | SF3A1        | 89  | 11             | 7             | 10.2%             | 0.00185 | 0.265 | 1  | 1  | Q15459                                            |
| Heterogeneous nuclear ribonucleoprotein U-like protein 2          | HNRNPUL2     | 85  | 11             | 6             | 12.0%             | 0.00197 | 0.318 | 1  | 1  | Q1KMD3                                            |
| LIM domain and actin-binding protein 1                            | LIMA1        | 85  | 11             | 4             | 8.0%              | 0.00245 | 0.202 | 2  | 1  | Q9UH86-2 F8V507 F8VQE1 Q9UH86 Q9UH86-4 Q9UH86-3   |
| Presequence protease, mitochondrial                               | PITRM1       | 114 | 10             | 6             | 10.6%             | 0.00129 | 0.276 | 1  | 3  | Q5JRX3-2 Q5JRX3 Q5JRX3-3                          |
| General vesicular transport factor p115                           | USO1         | 108 | 9              | 7             | 7.1%              | 0.00124 | 0.178 | 2  | 1  | O60763-2 F5H4X1 F5GYR8 O60763                     |
| Protein transport protein Sec24D                                  | SEC24D       | 113 | 9              | 7             | 8.1%              | 0.00116 | 0.205 | 1  | 2  | O94855-2 O94855                                   |
| DNA replication licensing factor MCM3                             | MCM3         | 91  | 9              | 7             | 9.3%              | 0.00149 | 0.239 | 1  | 3  | P25205 J3KQ69 B4DWWW4                             |
| Ephrin type-A receptor 2                                          | EPHA2        | 106 | 9              | 6             | 10.8%             | 0.00123 | 0.282 | 1  | 2  | P29317                                            |
| Ubiquitin carboxyl-terminal hydrolase 5                           | USP5         | 96  | 9              | 5             | 9.7%              | 0.00144 | 0.250 | 1  | 2  | P45974-2 P45974                                   |
| Neurabin-2                                                        | PPP1R9B      | 89  | 9              | 3             | 9.6%              | 0.00148 | 0.247 | 1  | 2  | Q96583                                            |
| Ankyrin-2                                                         | ANKK1        | 110 | 9              | 9             | 11.0%             | 0.00122 | 0.288 | 2  | 1  | Q9P0K7-2 E7EMX7 Q9P0K7 Q9P0K7-4 Q9P0K7-3          |
| Heat shock 70 kDa protein 4L                                      | HSPA4L       | 95  | 8              | 3             | 5.8%              | 0.00127 | 0.143 | 1  | 3  | Q95757 E9PDE8 E7ES43                              |
| DNA replication licensing factor MCM2                             | MCM2         | 102 | 8              | 4             | 5.3%              | 0.00118 | 0.130 | 1  | 4  | P497336 H0Y8E6                                    |
| Serrate RNA effector molecule homolog                             | SRRT         | 101 | 8              | 5             | 7.8%              | 0.00123 | 0.197 | 2  | 1  | Q9BXP5-2 H7C3A1 Q9BXP5 Q9BXP5-5 Q9BXP5-4 Q9BXP5-3 |
| Endothelin-converting enzyme 1                                    | ECE1         | 87  | 7              | 5             | 13.0%             | 0.00124 | 0.349 | 2  | 1  | P42892-3 B4DKB2 P42892 P42892-4                   |
| Smoothelin                                                        | SMTN         | 99  | 7              | 5             | 9.1%              | 0.00102 | 0.233 | 1  | 7  | P53814-5 P53814 P53814-6                          |
| Eukaryotic translation initiation factor 3 subunit B              | EIF3B        | 92  | 7              | 5             | 11.6%             | 0.00107 | 0.306 | 1  | 3  | P55884-2 P55884                                   |
| MAP7 domain-containing protein 1                                  | MAP7D1       | 93  | 7              | 4             | 6.8%              | 0.00117 | 0.169 | 1  | 1  | Q3KQU3-2 Q3KQU3 Q3KQU3-4                          |
| Pre-mRNA-processing factor 6                                      | PRPF6        | 107 | 6              | 6             | 8.2%              | 0.00089 | 0.208 | 1  | 1  | Q94906-2 Q94906                                   |
| POTE ankyrin domain family member J                               | POTEJ        | 117 | 6              | 3             | 3.2%              | 0.00077 | 0.076 | 3  | 1  | P0CG39                                            |
| Integrin alpha-3                                                  | ITGA3        | 114 | 6              | 5             | 5.9%              | 0.00075 | 0.146 | 1  | 5  | P26006-1 P26006                                   |
| Aspartyl/asparaginyl beta-hydroxylase                             | ASPH         | 86  | 6              | 3             | 7.0%              | 0.00110 | 0.175 | 1  | 3  | Q12797-10 Q12797                                  |
| KN motif and ankyrin repeat domain-containing protein 2           | KANK2        | 91  | 6              | 6             | 10.5%             | 0.00095 | 0.274 | 1  | 1  | Q63Z73-3 Q63Z73                                   |
| ATP-binding cassette sub-family F member 1                        | ABCF1        | 96  | 6              | 4             | 8.7%              | 0.00099 | 0.222 | 3  | 1  | Q8NE71-2 H0YGV7 Q8NE71                            |
| Condensin complex subunit 3                                       | NCAPG        | 114 | 6              | 4             | 5.5%              | 0.00079 | 0.135 | 1  | 1  | Q9BPX3                                            |
| Extended synaptotagmin-1                                          | ESYT1        | 123 | 6              | 4             | 5.2%              | 0.00072 | 0.127 | 1  | 1  | Q9BSJ8-2 Q9BSJ8                                   |
| DNA mismatch repair protein Msh2                                  | MSH2         | 105 | 5              | 5             | 7.1%              | 0.00077 | 0.178 | 2  | 1  | P43246-2 E9PHA6 P43246                            |
| Putative ribosomal RNA methyltransferase NOP2                     | NOP2         | 89  | 5              | 4             | 6.3%              | 0.00083 | 0.156 | 1  | 2  | P46087-2 P46087 P46087-4                          |
| Unconventional myosin-1e                                          | MYO1E        | 127 | 5              | 4             | 5.2%              | 0.00060 | 0.127 | 1  | 2  | Q12965                                            |
| Importin-4                                                        | IPO4         | 119 | 5              | 3             | 5.5%              | 0.00062 | 0.135 | 1  | 2  | Q8TEX9-2 Q8TEX9                                   |
| Importin-9                                                        | IPO9         | 116 | 5              | 5             | 6.0%              | 0.00064 | 0.148 | 1  | 3  | Q96P70                                            |
| Nck-associated protein 1                                          | NCKAP1       | 129 | 5              | 5             | 7.7%              | 0.00059 | 0.194 | 1  | 1  | Q9Y2A7-2 Q9Y2A7                                   |

## Supplemental Data 2

Kinesin-1 is a structural component of HSV-1 extracellular particles. Although microtubule motors were not previously detected in preparations of HSV-1 and PRV (references 20,21), the presence of kinesin-1 was indicated by the Kif5B-Bla reporter fusion in this study (Fig. 3). Shown here is a tandem mass spectrometry analysis of extracellular wild-type HSV-1 particles enriched for proteins in the range of approximately 100-150 kDa by SDS-PAGE extraction. The results were filtered for proteins with > 4 spectral counts and that were in the expected mass range. The presence of kinesin-1 is highlighted in blue. The lack of kinesin-1 detection in earlier studies may be accounted for by a low virion copy number. The current analysis benefited from advances in mass spectrometry and by enriching for proteins by mass prior to analysis.

**Supplemental Data 3** Data derived from automated analysis of capsid localization that supports Figures 1C. The spreadsheet includes all formula for post-analysis of automated data pipeline.

**\*\*Data is provided as a separate Excel file**

**Supplemental Data 4** Data derived from automated analysis of capsid localization that supports Figures 2D. These spreadsheet includes all formula for post-analysis of automated data pipeline.

**\*\*Data is provided as a separate Excel file**

**Supplemental Video 1** Motility of transiently expressed pUL36 in Vero and hTERT-RPE cells. The gene encoding pUL36 was cloned from PRV strain Becker as a GFP fusion and truncated for the C-terminal 115aa to prevent autoinhibition (pGS3384 in Extended Data Table 1). Recordings at left document representative cells displaying curvilinear transport. Recording at right exemplifies protein accumulation at the cell periphery and juxtannuclear. Images were captured at 10 frames/s.

**\*\*Movie is provided as a separate .mov file**

**Supplemental Video 2** Capsid motility in the vicinity of neuronal nuclei. Explanted chick dorsal root ganglia were infected with PRV-GS4284 (encodes a red-fluorescent capsid tag; pUL25/mCherry). Images were captured at 10 frames/s between 1-2 hpi.

**\*\*Movie is provided as a separate .mov file**

**Supplemental Figure 1** Compilation of unprocessed western blots used in the production of the figures. These images immediately follow in the remainder of this document.

# Sup Figure 1

## Related to Fig. 1a

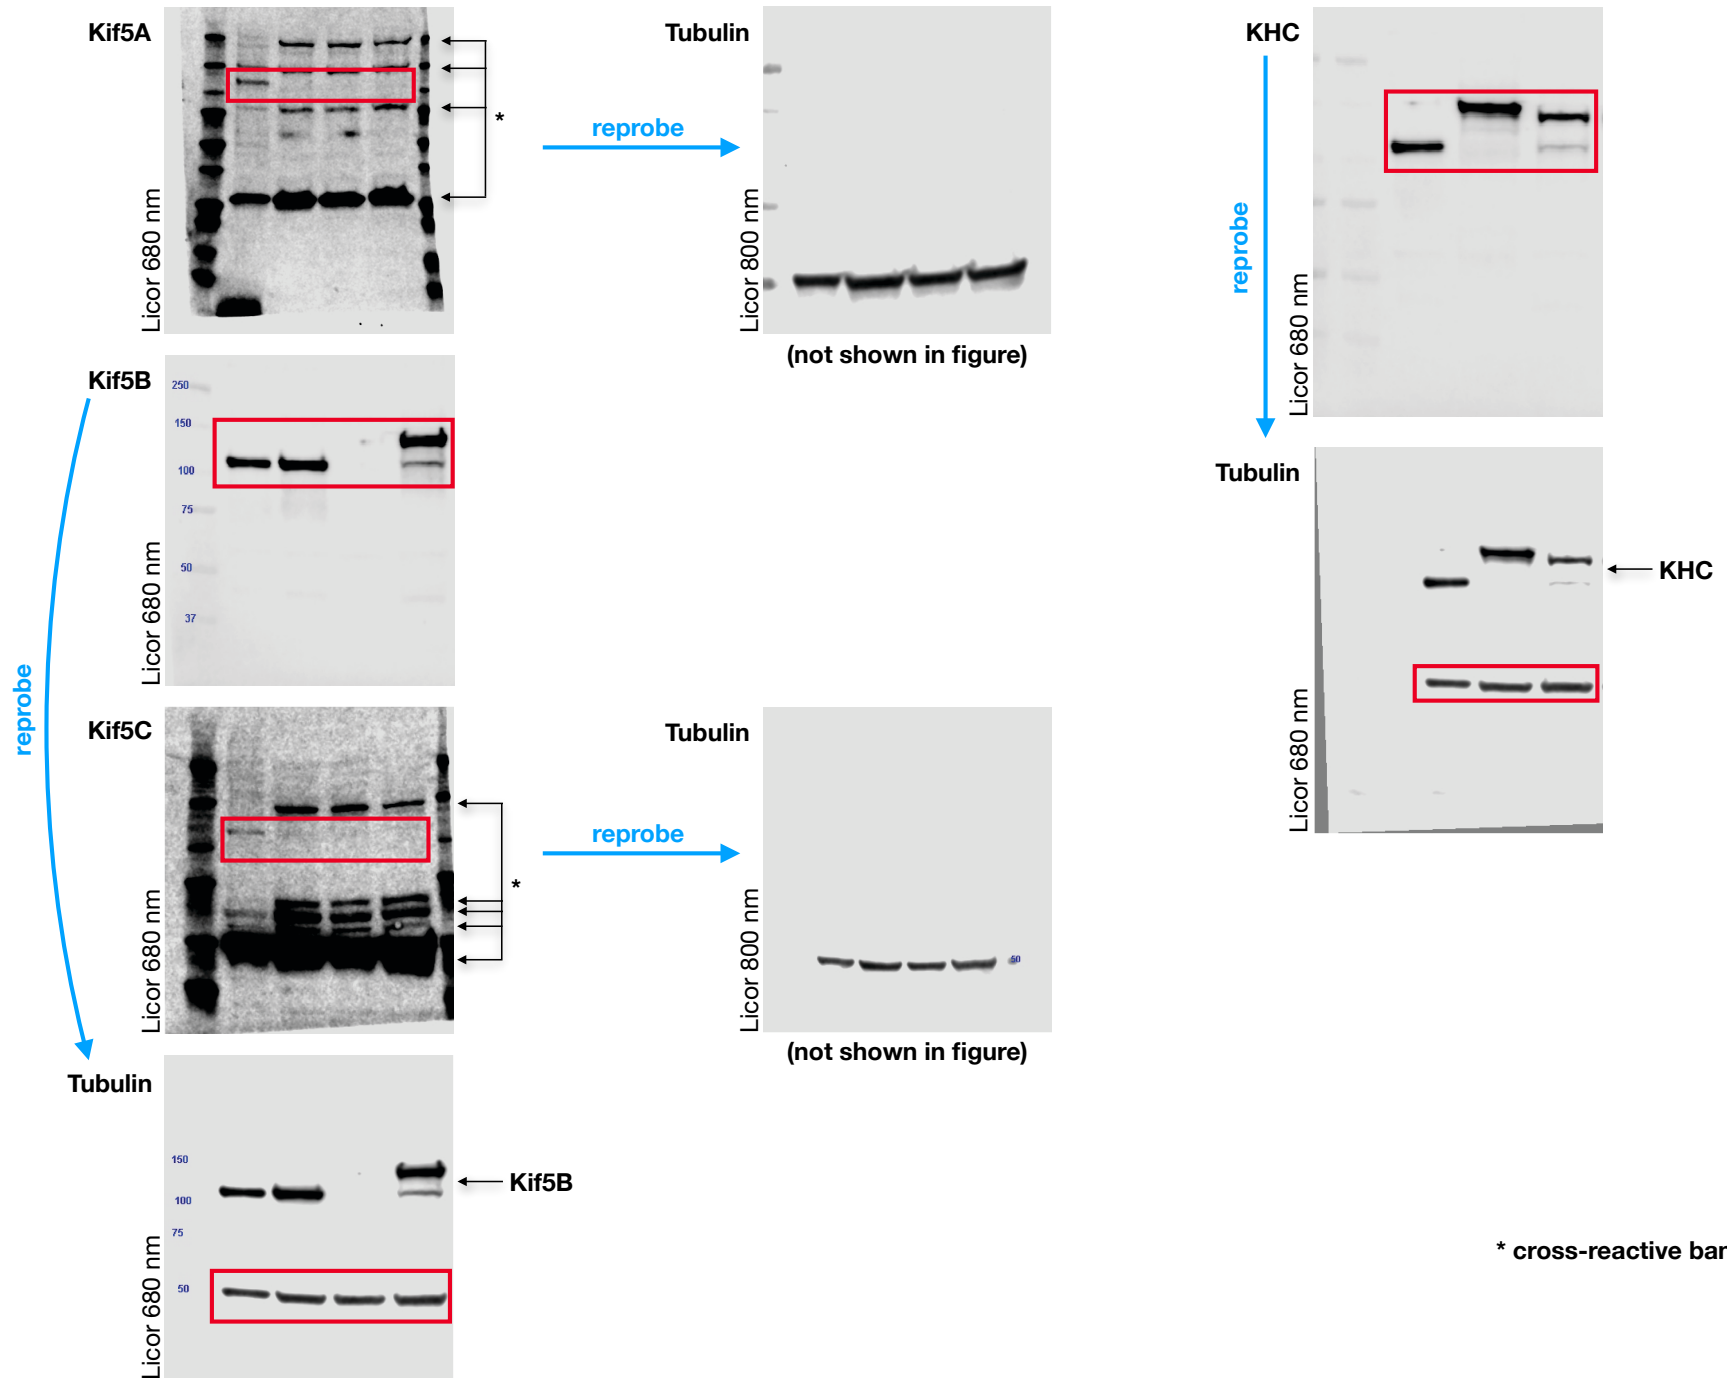

\* cross-reactive bands

# Related to Extended Data Fig. 2a

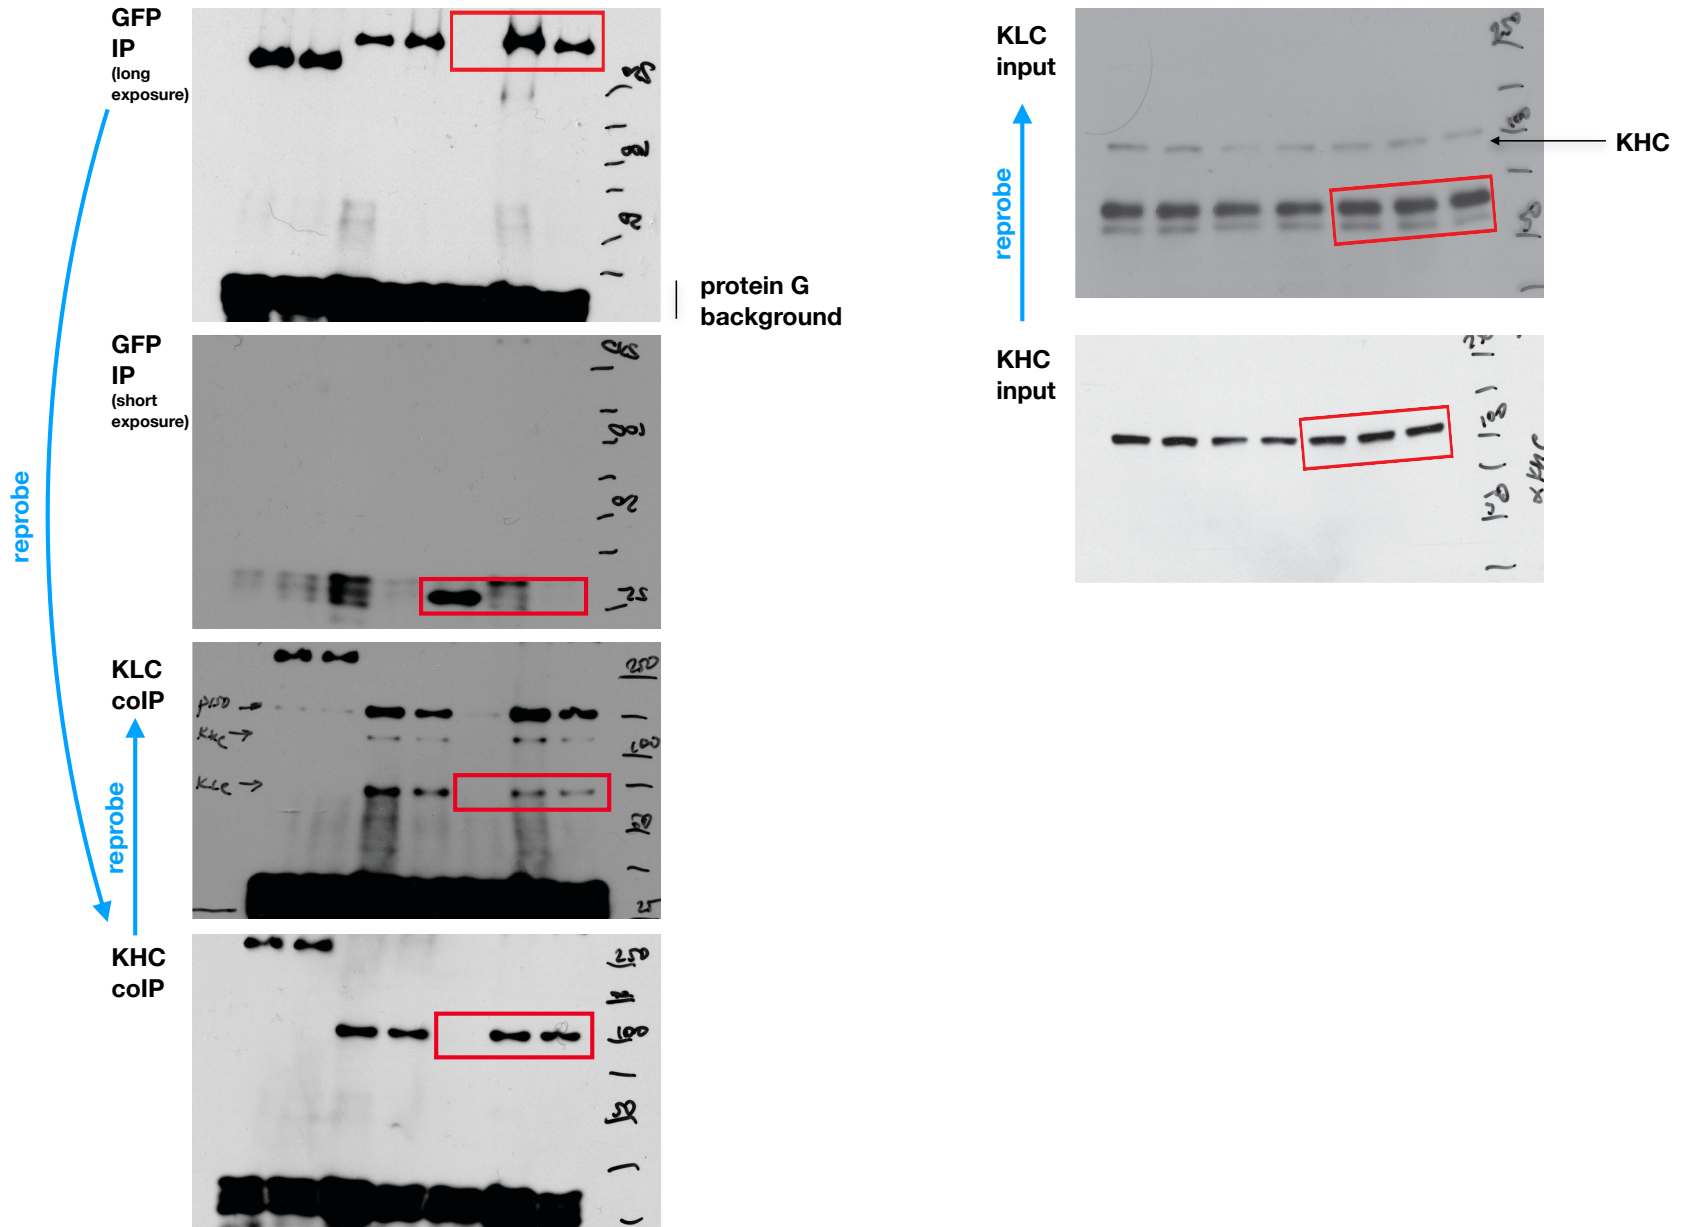

## Related to Extended Data Fig. 2c

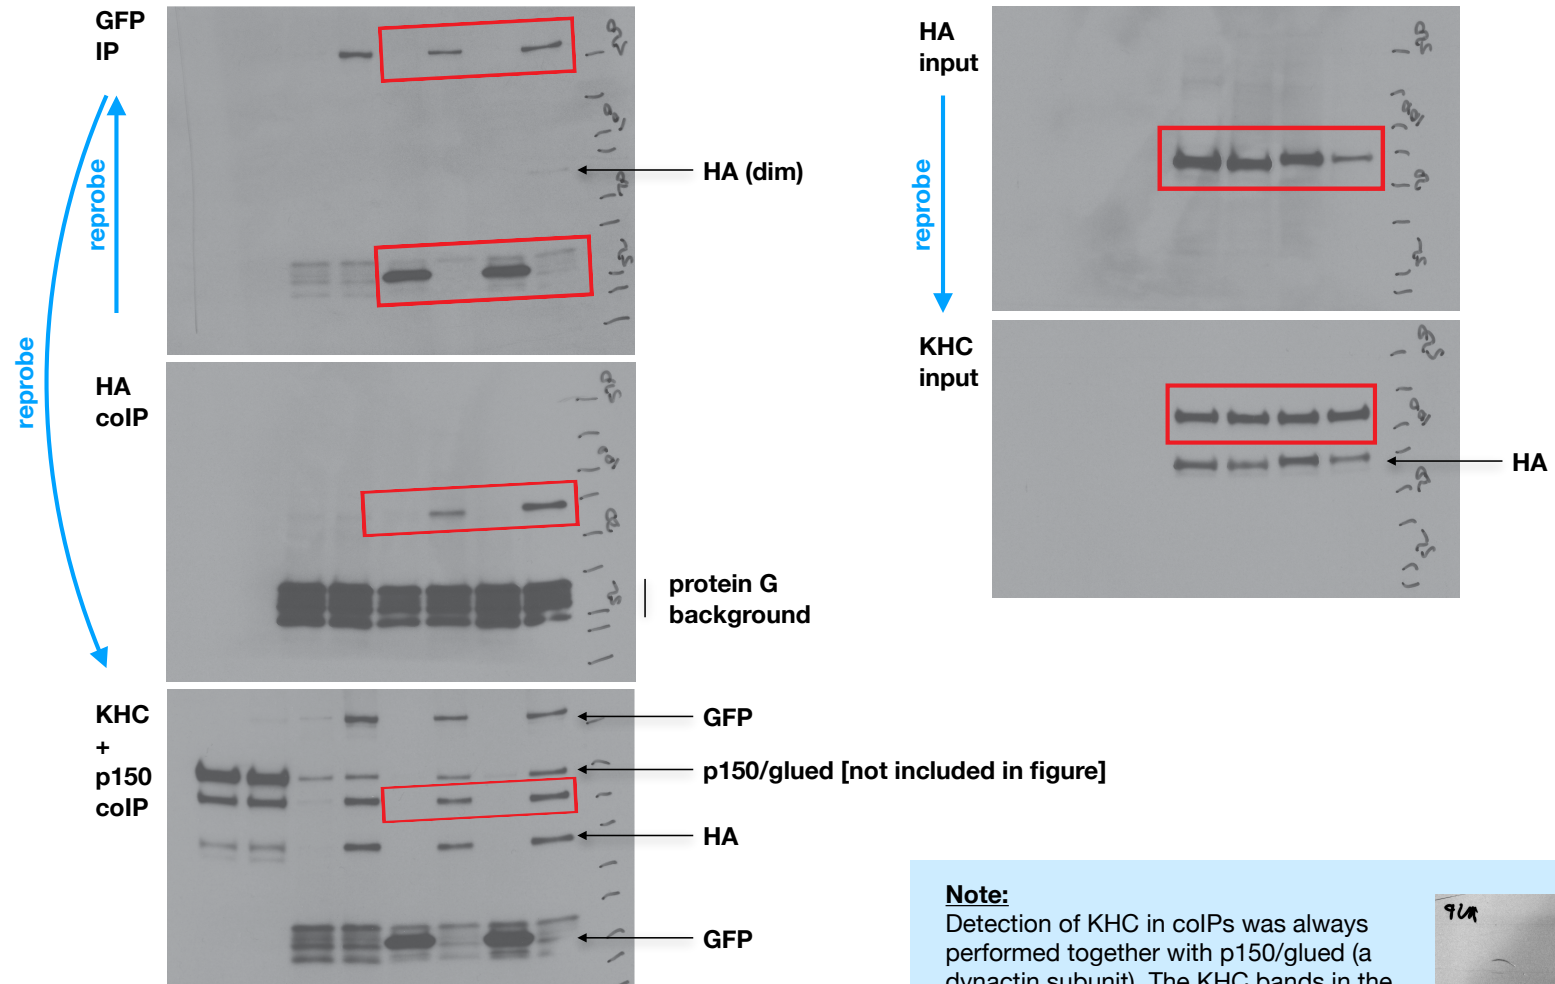

### Note:

Detection of KHC in colPs was always performed together with p150/glued (a dynactin subunit). The KHC bands in the colP correspond in MW to those observed in the KHC input blot. In further support that the bands identified as KHC are not a p150/glued product, we include a blot of p150/glued using the same cells (HEK293) to document that the Ab detects a single 150 kD species (right).

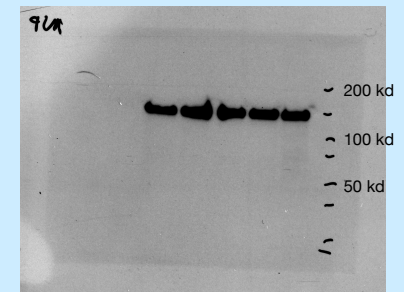



# Related to Extended Data Fig. 3b

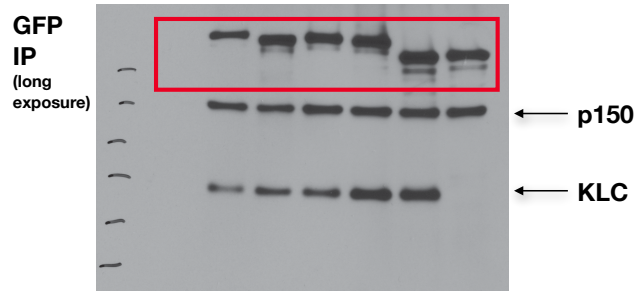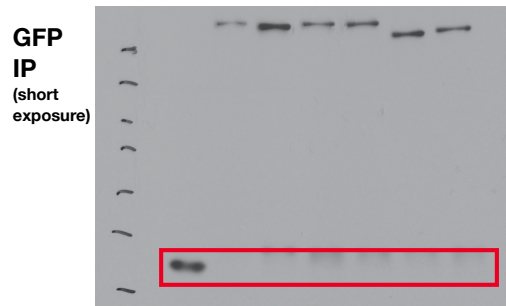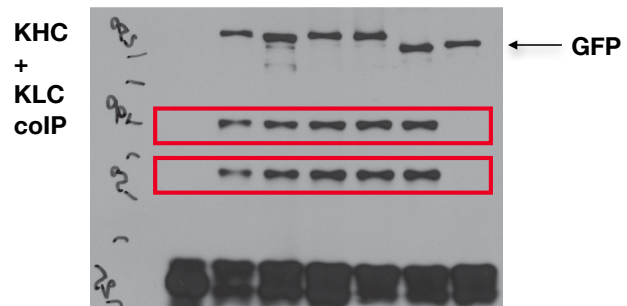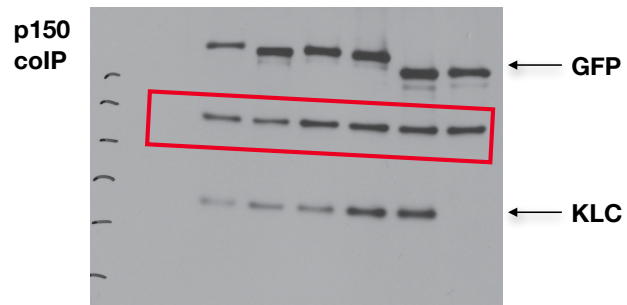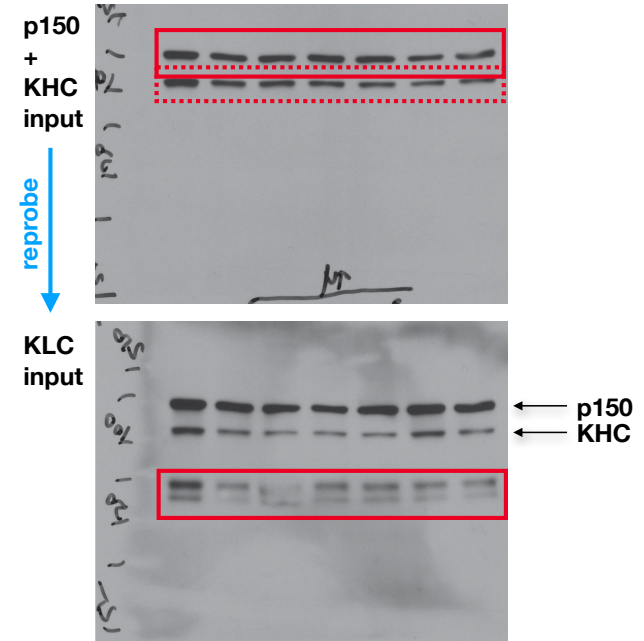



# Related to Extended Data Fig. 3c

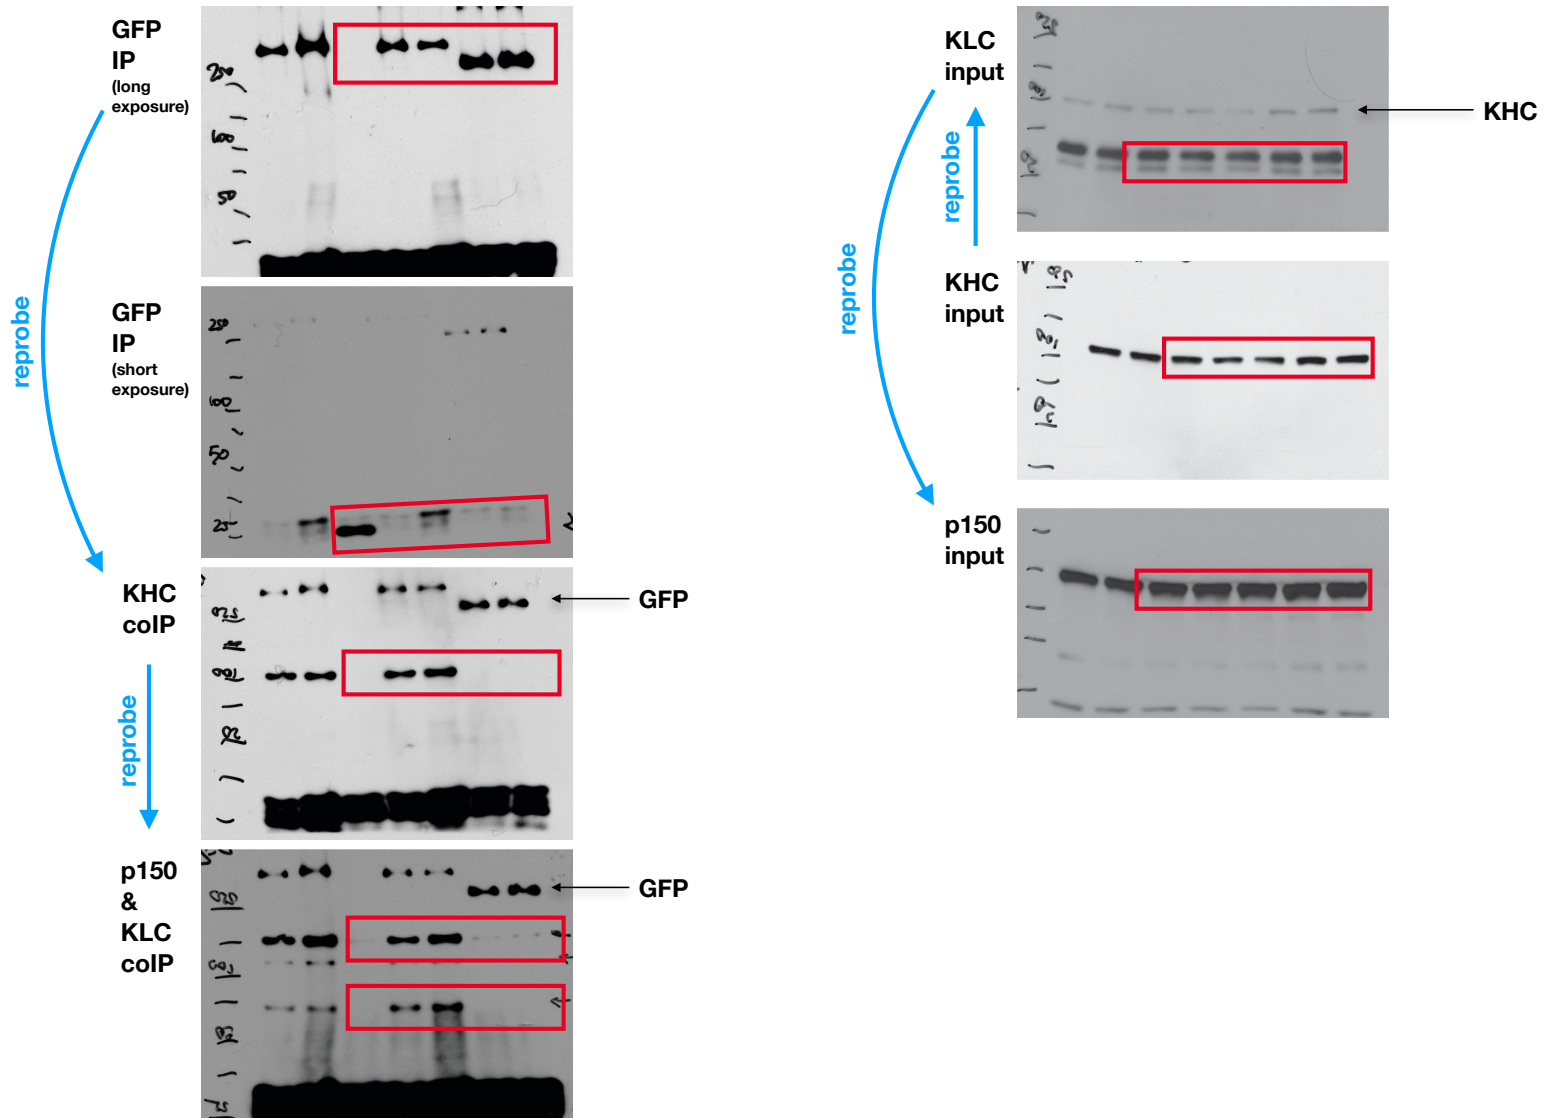

# Related to Extended Data Fig. 3d

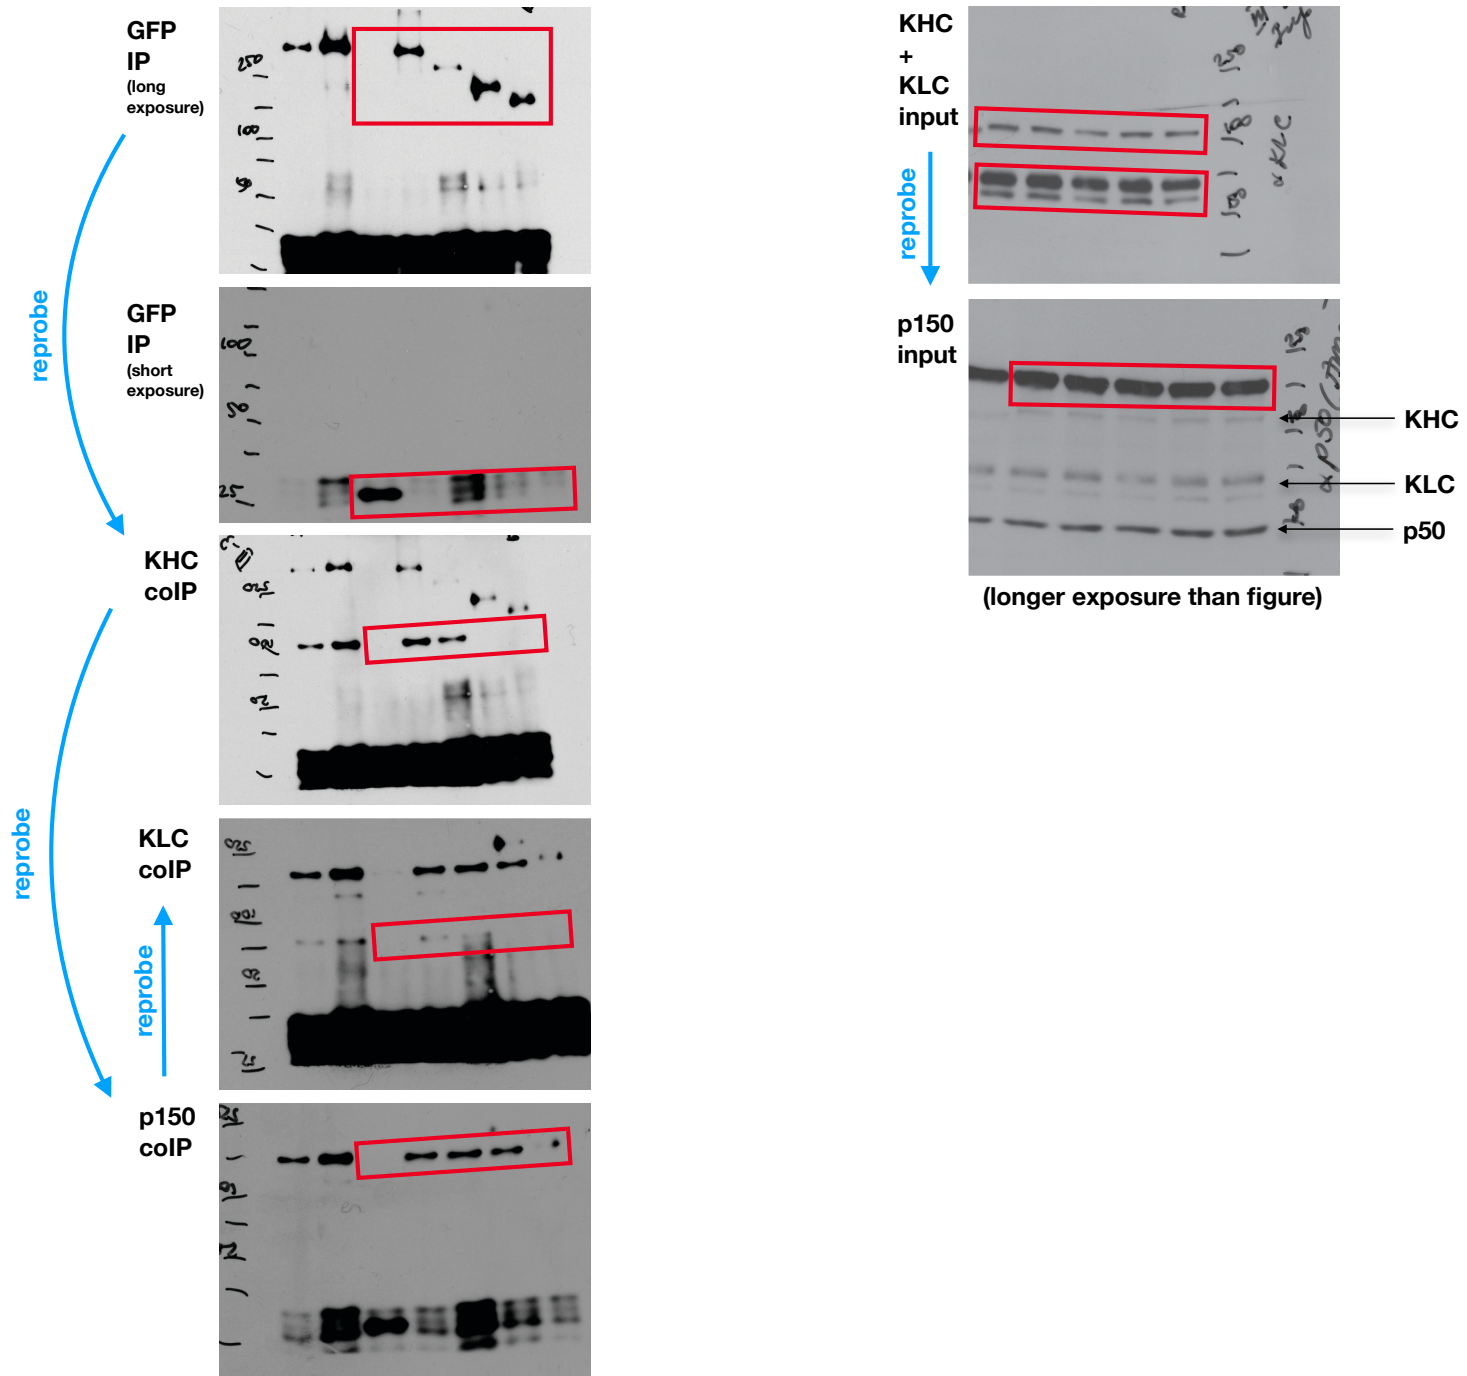

# Related to Extended Data Fig. 3e

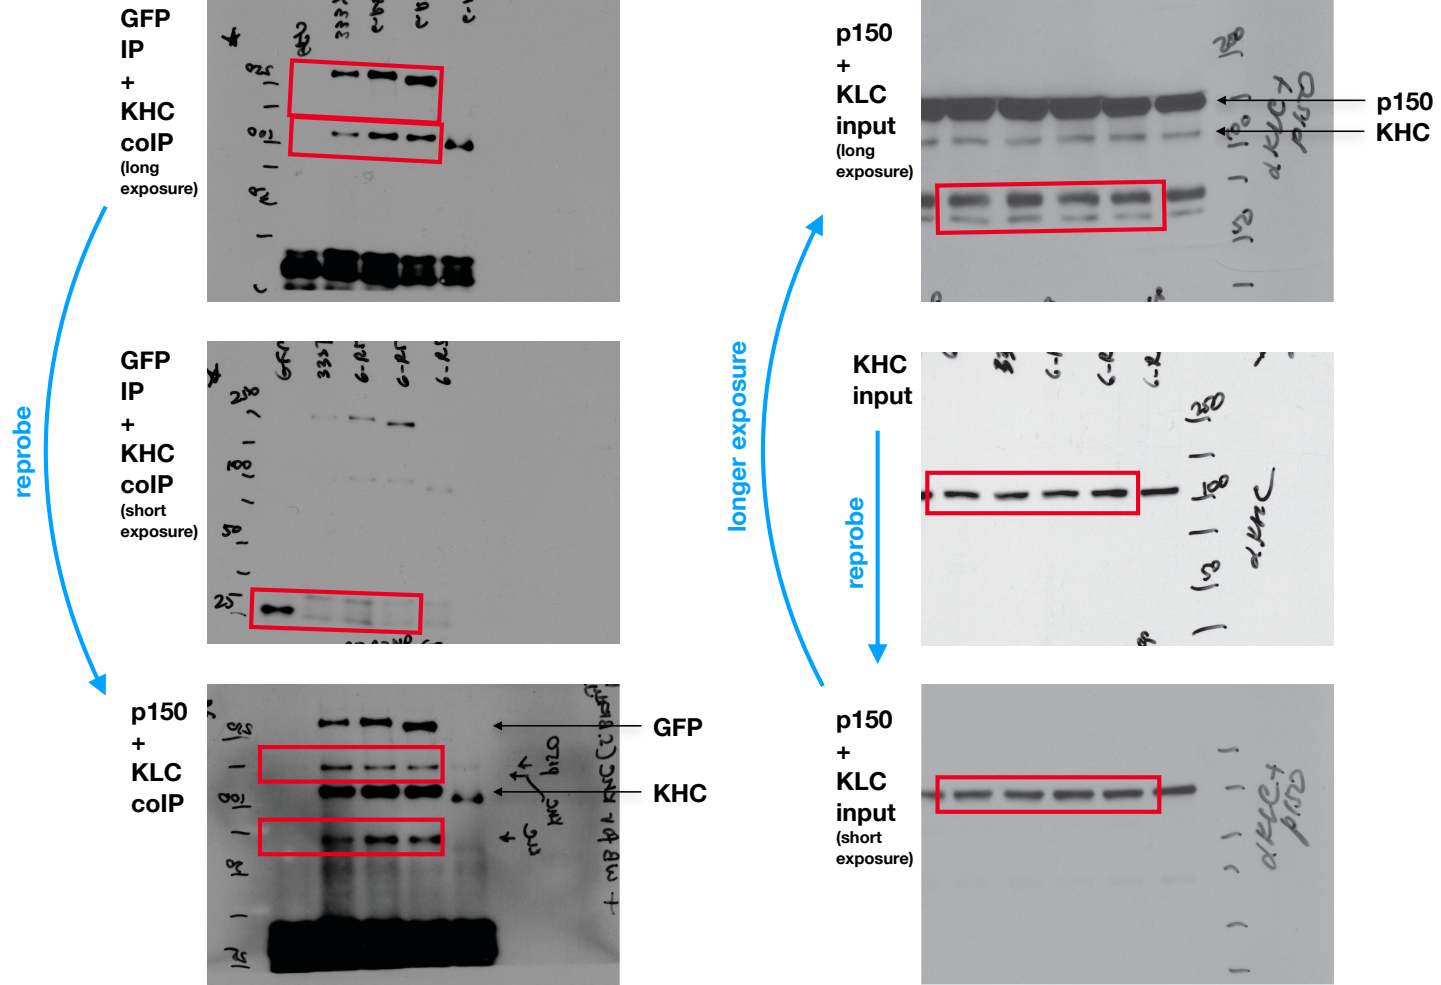

# Related to Extended Data Fig. 4b

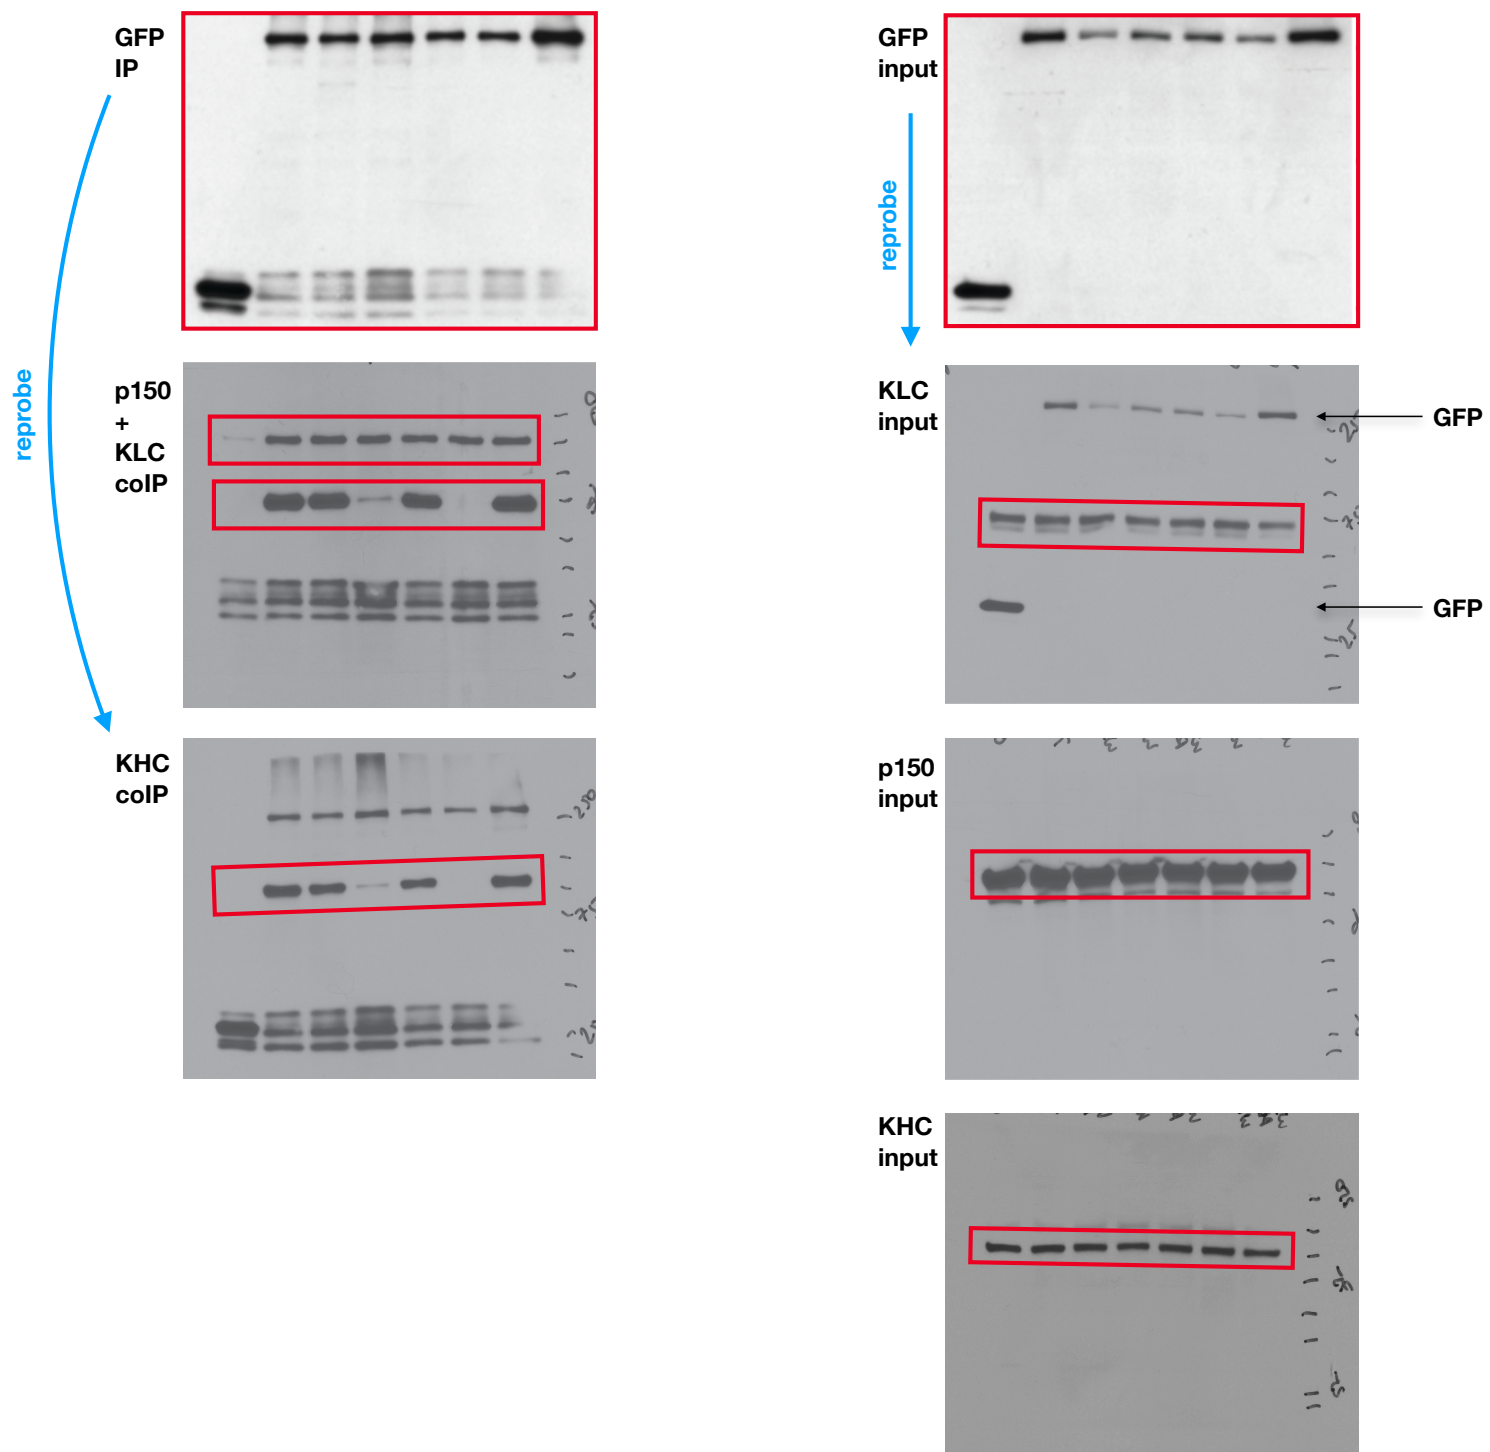



Related to Extended Data Fig. 4c

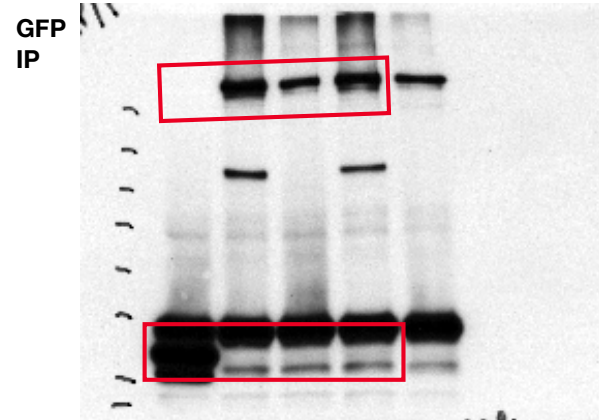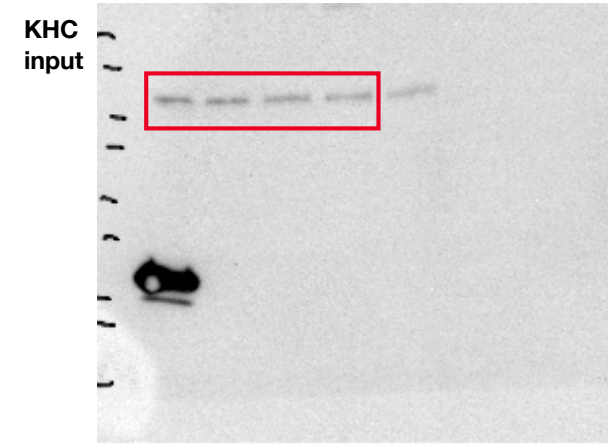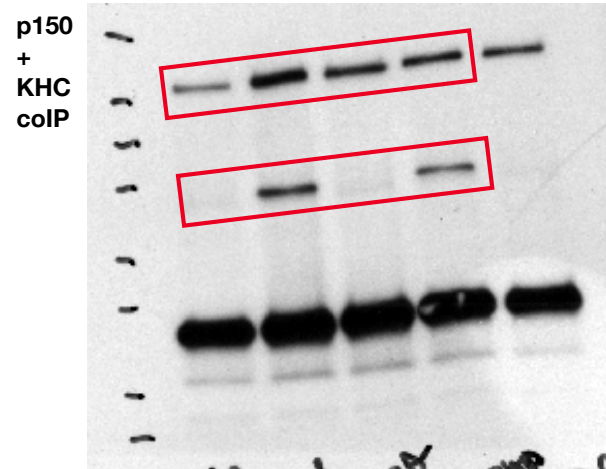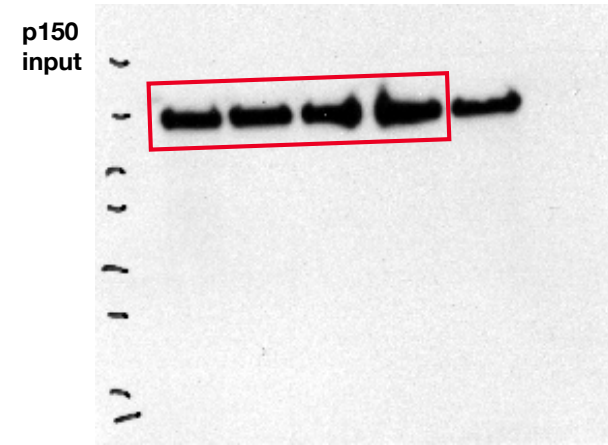

# Related to Extended Data Fig. 4d

GFP  
IP  
+  
KHC  
coIP

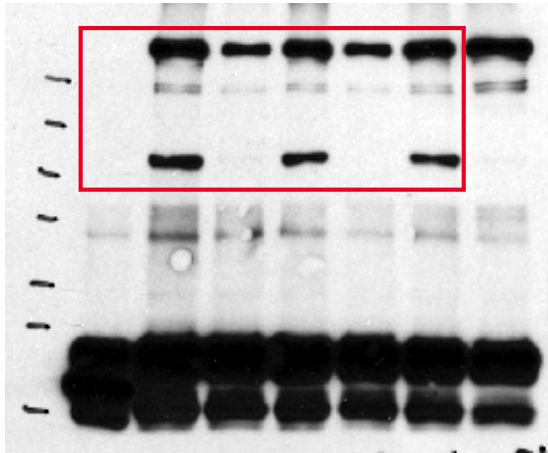

KHC  
input

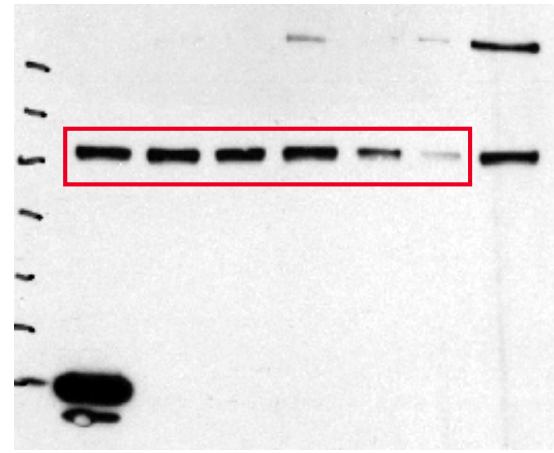

p150  
+  
KLC  
coIP  
(long  
exposure)

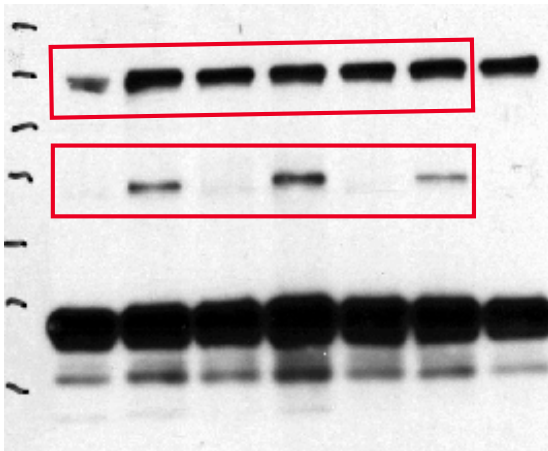

p150  
input

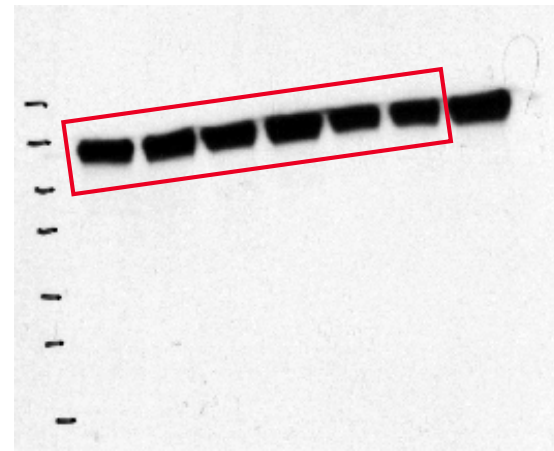

p150  
+  
KLC  
coIP  
(short  
exposure)

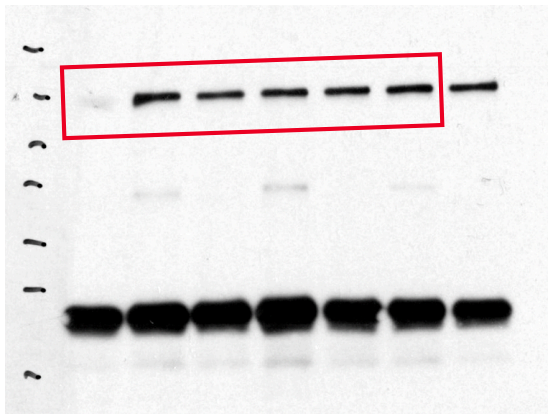

# Related to Extended Data Fig. 7a

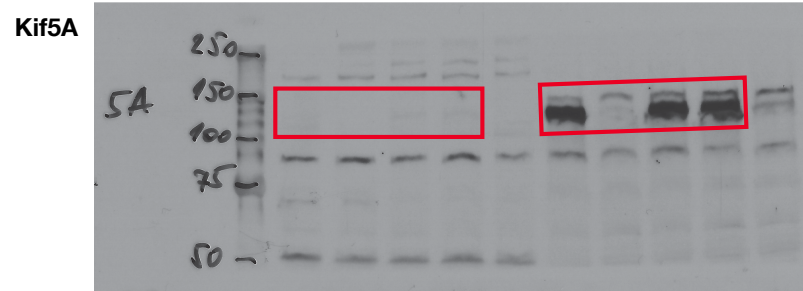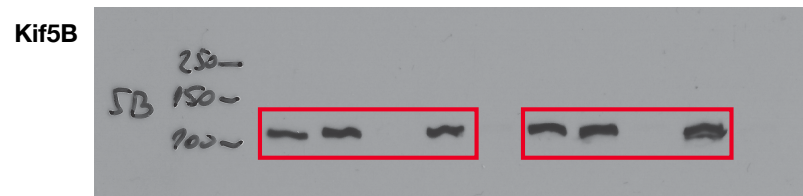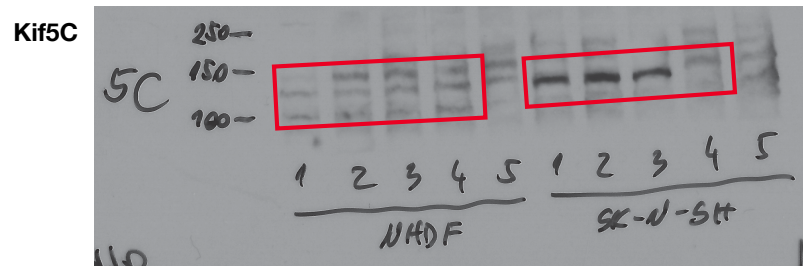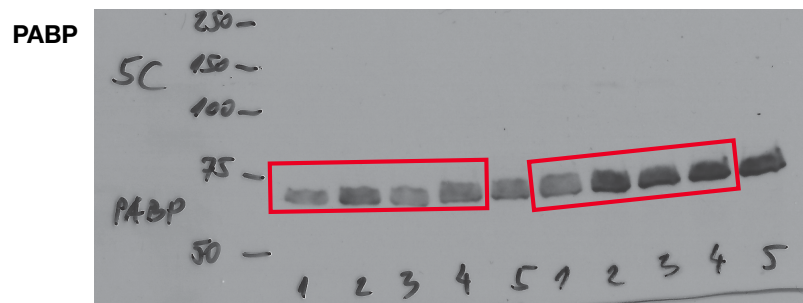

Supplement: NIHMS1754681-supplement-1754681_Sup_info.pdf [file NIHMS1754681-supplement-1754681_Sup_info.pdf]
