# Supplementary material
Source: PubMed Central journal article supplement (PMC8675142)
Supplement: NIHMS1754681-supplement-1754681_Sup_Data_3.pdf [file NIHMS1754681-supplement-1754681_Sup_Data_3.pdf]

| Item | Source   | FieldID | ObjID | Capsid Sum Intensity | Est # Capsids | Capsid>Cent |
|------|----------|---------|-------|----------------------|---------------|-------------|
| 1    | 1_WT.nd2 | 1       | 1     | 22093                | 1             | 37.01       |
| 2    | 1_WT.nd2 | 1       | 2     | 20034                | 1             | 71.59       |
| 3    | 1_WT.nd2 | 1       | 3     | 19083                | 1             | 66.61       |
| 4    | 1_WT.nd2 | 1       | 4     | 21202                | 1             | 47.2        |
| 5    | 1_WT.nd2 | 1       | 5     | 13686                | 1             | 44.82       |
| 6    | 1_WT.nd2 | 1       | 6     | 24472                | 1             | 37.2        |
| 7    | 1_WT.nd2 | 1       | 7     | 16906                | 1             | 36.72       |
| 8    | 1_WT.nd2 | 1       | 8     | 44784                | 2             | 22.83       |
| 9    | 1_WT.nd2 | 1       | 9     | 33778                | 2             | 18.97       |
| 10   | 1_WT.nd2 | 1       | 10    | 23276                | 1             | 12          |
| 11   | 1_WT.nd2 | 1       | 11    | 23731                | 1             | 10.77       |
| 12   | 1_WT.nd2 | 1       | 12    | 22508                | 1             | 12.08       |
| 13   | 1_WT.nd2 | 1       | 13    | 201538               | 10            | 24          |
| 14   | 1_WT.nd2 | 1       | 14    | 16205                | 1             | 5           |
| 15   | 1_WT.nd2 | 1       | 15    | 18361                | 1             | 71.7        |
| 16   | 1_WT.nd2 | 1       | 16    | 19515                | 1             | 15.81       |
| 17   | 1_WT.nd2 | 1       | 17    | 21264                | 1             | 24.7        |
| 18   | 1_WT.nd2 | 1       | 18    | 16145                | 1             | 103.12      |
| 19   | 1_WT.nd2 | 1       | 19    | 21480                | 1             | 17.46       |
| 20   | 1_WT.nd2 | 1       | 20    | 209348               | 10            | 16.28       |
| 21   | 1_WT.nd2 | 1       | 21    | 21340                | 1             | 40.31       |
| 22   | 1_WT.nd2 | 1       | 22    | 18739                | 1             | 36          |
| 23   | 1_WT.nd2 | 1       | 23    | 27763                | 1             | 0           |
| 24   | 1_WT.nd2 | 1       | 24    | 22617                | 1             | 61.61       |
| 25   | 1_WT.nd2 | 1       | 25    | 94800                | 5             | 15.81       |
| 26   | 1_WT.nd2 | 1       | 26    | 21511                | 1             | 42.64       |
| 27   | 1_WT.nd2 | 1       | 27    | 26322                | 1             | 67.03       |
| 28   | 1_WT.nd2 | 1       | 28    | 17039                | 1             | 32.57       |
| 29   | 1_WT.nd2 | 1       | 29    | 65711                | 3             | 60.02       |
| 30   | 1_WT.nd2 | 1       | 30    | 21928                | 1             | 43.91       |
| 31   | 1_WT.nd2 | 1       | 31    | 509185               | 25            | 42.43       |
| 32   | 1_WT.nd2 | 1       | 32    | 25940                | 1             | 54.71       |
| 33   | 1_WT.nd2 | 1       | 33    | 18025                | 1             | 43.83       |
| 34   | 1_WT.nd2 | 1       | 34    | 21060                | 1             | 0           |
| 35   | 1_WT.nd2 | 1       | 35    | 20280                | 1             | 25          |
| 36   | 1_WT.nd2 | 1       | 36    | 28339                | 1             | 47.85       |
| 37   | 1_WT.nd2 | 1       | 37    | 28331                | 1             | 42.44       |
| 38   | 1_WT.nd2 | 1       | 38    | 23553                | 1             | 60.17       |
| 39   | 1_WT.nd2 | 1       | 39    | 34231                | 2             | 59.21       |
| 40   | 1_WT.nd2 | 1       | 40    | 89886                | 4             | 48.51       |
| 41   | 1_WT.nd2 | 1       | 41    | 22392                | 1             | 5           |
| 42   | 1_WT.nd2 | 1       | 42    | 24326                | 1             | 24.04       |

|    |          |   |    |        |    |        |
|----|----------|---|----|--------|----|--------|
| 43 | 1_WT.nd2 | 1 | 43 | 22518  | 1  | 42.01  |
| 44 | 1_WT.nd2 | 1 | 44 | 24696  | 1  | 67.12  |
| 45 | 1_WT.nd2 | 1 | 45 | 307780 | 15 | 30.89  |
| 46 | 1_WT.nd2 | 1 | 46 | 20523  | 1  | 33.06  |
| 47 | 1_WT.nd2 | 1 | 47 | 52708  | 3  | 25.71  |
| 48 | 1_WT.nd2 | 1 | 48 | 21449  | 1  | 43.38  |
| 49 | 1_WT.nd2 | 1 | 49 | 16421  | 1  | 34.01  |
| 50 | 1_WT.nd2 | 1 | 50 | 25076  | 1  | 27.31  |
| 51 | 1_WT.nd2 | 1 | 51 | 22658  | 1  | 139.13 |
| 52 | 1_WT.nd2 | 1 | 52 | 21507  | 1  | 51.97  |
| 53 | 1_WT.nd2 | 1 | 53 | 39967  | 2  | 32     |
| 54 | 1_WT.nd2 | 1 | 54 | 508717 | 25 | 27.59  |
| 55 | 1_WT.nd2 | 1 | 55 | 40708  | 2  | 32.39  |
| 56 | 1_WT.nd2 | 1 | 56 | 19381  | 1  | 39.82  |
| 57 | 1_WT.nd2 | 1 | 57 | 17325  | 1  | 36.24  |
| 58 | 1_WT.nd2 | 1 | 58 | 20577  | 1  | 68.62  |
| 59 | 1_WT.nd2 | 1 | 59 | 30605  | 2  | 12.37  |
| 60 | 1_WT.nd2 | 1 | 60 | 18842  | 1  | 21.93  |
| 61 | 1_WT.nd2 | 1 | 61 | 20099  | 1  | 30.87  |
| 62 | 1_WT.nd2 | 1 | 62 | 205251 | 10 | 11.7   |
| 63 | 1_WT.nd2 | 1 | 63 | 16563  | 1  | 18.38  |
| 64 | 1_WT.nd2 | 1 | 64 | 22784  | 1  | 269.22 |
| 65 | 1_WT.nd2 | 1 | 65 | 22170  | 1  | 51.4   |
| 66 | 1_WT.nd2 | 1 | 66 | 66444  | 3  | 8.06   |
| 67 | 1_WT.nd2 | 1 | 67 | 20816  | 1  | 12.04  |
| 68 | 1_WT.nd2 | 1 | 68 | 21766  | 1  | 4.24   |
| 69 | 1_WT.nd2 | 1 | 69 | 21556  | 1  | 130.86 |
| 70 | 1_WT.nd2 | 1 | 70 | 21683  | 1  | 26.17  |
| 71 | 1_WT.nd2 | 1 | 71 | 20193  | 1  | 37.48  |
| 72 | 1_WT.nd2 | 1 | 72 | 209482 | 10 | 126.49 |
| 73 | 1_WT.nd2 | 1 | 73 | 19134  | 1  | 26.93  |
| 74 | 1_WT.nd2 | 1 | 74 | 20280  | 1  | 84.9   |
| 75 | 1_WT.nd2 | 1 | 75 | 16778  | 1  | 13.89  |
| 76 | 1_WT.nd2 | 1 | 76 | 22360  | 1  | 2      |
| 77 | 1_WT.nd2 | 1 | 77 | 20169  | 1  | 60.83  |
| 78 | 1_WT.nd2 | 1 | 78 | 23239  | 1  | 89.32  |
| 79 | 1_WT.nd2 | 1 | 79 | 20450  | 1  | 43.01  |
| 80 | 1_WT.nd2 | 1 | 80 | 17764  | 1  | 73.54  |
| 81 | 1_WT.nd2 | 1 | 81 | 20224  | 1  | 35.34  |
| 82 | 1_WT.nd2 | 1 | 82 | 20048  | 1  | 36.4   |
| 83 | 1_WT.nd2 | 1 | 83 | 18322  | 1  | 44     |
| 84 | 1_WT.nd2 | 1 | 84 | 21978  | 1  | 39.22  |
| 85 | 1_WT.nd2 | 1 | 85 | 63250  | 3  | 15.81  |

|     |          |   |     |        |    |        |
|-----|----------|---|-----|--------|----|--------|
| 86  | 1_WT.nd2 | 1 | 86  | 22001  | 1  | 29.97  |
| 87  | 1_WT.nd2 | 1 | 87  | 22559  | 1  | 35.69  |
| 88  | 1_WT.nd2 | 1 | 88  | 22945  | 1  | 12.53  |
| 89  | 1_WT.nd2 | 1 | 89  | 21517  | 1  | 15.56  |
| 90  | 1_WT.nd2 | 1 | 90  | 18705  | 1  | 2.24   |
| 91  | 1_WT.nd2 | 1 | 91  | 26764  | 1  | 5      |
| 92  | 1_WT.nd2 | 1 | 92  | 23345  | 1  | 44.91  |
| 93  | 1_WT.nd2 | 1 | 93  | 23428  | 1  | 2.83   |
| 94  | 1_WT.nd2 | 1 | 94  | 18001  | 1  | 41.44  |
| 95  | 1_WT.nd2 | 1 | 95  | 20554  | 1  | 0      |
| 96  | 1_WT.nd2 | 1 | 96  | 21951  | 1  | 5.83   |
| 97  | 1_WT.nd2 | 1 | 97  | 26464  | 1  | 0      |
| 98  | 1_WT.nd2 | 1 | 98  | 20119  | 1  | 6.4    |
| 99  | 1_WT.nd2 | 1 | 99  | 20830  | 1  | 17.03  |
| 100 | 1_WT.nd2 | 1 | 100 | 32682  | 2  | 39.05  |
| 101 | 1_WT.nd2 | 1 | 101 | 28518  | 1  | 34.13  |
| 102 | 1_WT.nd2 | 1 | 102 | 21771  | 1  | 48.84  |
| 103 | 1_WT.nd2 | 1 | 103 | 19919  | 1  | 12     |
| 104 | 1_WT.nd2 | 1 | 104 | 27156  | 1  | 31.95  |
| 105 | 1_WT.nd2 | 1 | 105 | 30181  | 2  | 42.38  |
| 106 | 1_WT.nd2 | 1 | 106 | 21318  | 1  | 73.08  |
| 107 | 1_WT.nd2 | 1 | 107 | 19344  | 1  | 77.49  |
| 108 | 1_WT.nd2 | 1 | 108 | 25626  | 1  | 58.8   |
| 109 | 1_WT.nd2 | 1 | 109 | 18347  | 1  | 63.89  |
| 110 | 1_WT.nd2 | 1 | 110 | 20754  | 1  | 73     |
| 111 | 1_WT.nd2 | 1 | 111 | 30191  | 2  | 45.79  |
| 112 | 1_WT.nd2 | 1 | 112 | 32903  | 2  | 11     |
| 113 | 1_WT.nd2 | 1 | 113 | 147185 | 7  | 80.6   |
| 114 | 1_WT.nd2 | 1 | 114 | 20613  | 1  | 68.88  |
| 115 | 1_WT.nd2 | 1 | 115 | 25727  | 1  | 6      |
| 116 | 1_WT.nd2 | 1 | 116 | 21641  | 1  | 68.26  |
| 117 | 1_WT.nd2 | 1 | 117 | 23490  | 1  | 84.05  |
| 118 | 1_WT.nd2 | 1 | 118 | 132182 | 7  | 70.03  |
| 119 | 1_WT.nd2 | 1 | 119 | 29377  | 1  | 98.41  |
| 120 | 1_WT.nd2 | 1 | 120 | 141506 | 7  | 80.95  |
| 121 | 1_WT.nd2 | 1 | 121 | 928326 | 46 | 72.25  |
| 122 | 1_WT.nd2 | 1 | 122 | 128835 | 6  | 80.96  |
| 123 | 1_WT.nd2 | 1 | 123 | 209160 | 10 | 78.45  |
| 124 | 1_WT.nd2 | 1 | 124 | 302727 | 15 | 76.49  |
| 125 | 1_WT.nd2 | 1 | 125 | 27462  | 1  | 108.27 |
| 126 | 1_WT.nd2 | 1 | 126 | 21205  | 1  | 108.42 |
| 127 | 1_WT.nd2 | 1 | 127 | 41195  | 2  | 89.99  |
| 128 | 1_WT.nd2 | 1 | 128 | 35682  | 2  | 35.34  |

|     |          |   |     |        |    |        |
|-----|----------|---|-----|--------|----|--------|
| 129 | 1_WT.nd2 | 1 | 129 | 402866 | 20 | 102.46 |
| 130 | 1_WT.nd2 | 1 | 130 | 58101  | 3  | 41.18  |
| 131 | 1_WT.nd2 | 1 | 131 | 20846  | 1  | 102.62 |
| 132 | 1_WT.nd2 | 1 | 132 | 37258  | 2  | 110.11 |
| 133 | 1_WT.nd2 | 1 | 133 | 16921  | 1  | 112.31 |
| 134 | 1_WT.nd2 | 1 | 134 | 64066  | 3  | 73.66  |
| 135 | 1_WT.nd2 | 1 | 135 | 16445  | 1  | 112.8  |
| 136 | 1_WT.nd2 | 1 | 136 | 23051  | 1  | 57.98  |
| 137 | 1_WT.nd2 | 1 | 137 | 20405  | 1  | 125    |
| 138 | 1_WT.nd2 | 1 | 138 | 30423  | 2  | 134.65 |
| 139 | 1_WT.nd2 | 1 | 139 | 15157  | 1  | 98.9   |
| 140 | 1_WT.nd2 | 1 | 140 | 20997  | 1  | 137.52 |
| 141 | 1_WT.nd2 | 1 | 141 | 22978  | 1  | 93.41  |
| 142 | 1_WT.nd2 | 1 | 142 | 150243 | 7  | 0      |
| 143 | 1_WT.nd2 | 1 | 143 | 83667  | 4  | 81.02  |
| 144 | 1_WT.nd2 | 1 | 144 | 131563 | 7  | 133.51 |
| 145 | 1_WT.nd2 | 1 | 145 | 21216  | 1  | 164.15 |
| 146 | 1_WT.nd2 | 2 | 1   | 19196  | 1  | 36.77  |
| 147 | 1_WT.nd2 | 2 | 2   | 18398  | 1  | 27.07  |
| 148 | 1_WT.nd2 | 2 | 3   | 18578  | 1  | 30.08  |
| 149 | 1_WT.nd2 | 2 | 4   | 22701  | 1  | 99.9   |
| 150 | 1_WT.nd2 | 2 | 5   | 19683  | 1  | 94.64  |
| 151 | 1_WT.nd2 | 2 | 6   | 18937  | 1  | 92.2   |
| 152 | 1_WT.nd2 | 2 | 7   | 19993  | 1  | 78.71  |
| 153 | 1_WT.nd2 | 2 | 8   | 20910  | 1  | 72.8   |
| 154 | 1_WT.nd2 | 2 | 9   | 18544  | 1  | 25.55  |
| 155 | 1_WT.nd2 | 2 | 10  | 56836  | 3  | 24.21  |
| 156 | 1_WT.nd2 | 2 | 11  | 43370  | 2  | 19.24  |
| 157 | 1_WT.nd2 | 2 | 12  | 19222  | 1  | 107.38 |
| 158 | 1_WT.nd2 | 2 | 13  | 19311  | 1  | 42.05  |
| 159 | 1_WT.nd2 | 2 | 14  | 18588  | 1  | 14.21  |
| 160 | 1_WT.nd2 | 2 | 15  | 22444  | 1  | 19.72  |
| 161 | 1_WT.nd2 | 2 | 16  | 23818  | 1  | 17.69  |
| 162 | 1_WT.nd2 | 2 | 17  | 19015  | 1  | 24.76  |
| 163 | 1_WT.nd2 | 2 | 18  | 20317  | 1  | 20.02  |
| 164 | 1_WT.nd2 | 2 | 19  | 21579  | 1  | 35.85  |
| 165 | 1_WT.nd2 | 2 | 20  | 29363  | 1  | 46.4   |
| 166 | 1_WT.nd2 | 2 | 21  | 18667  | 1  | 57.28  |
| 167 | 1_WT.nd2 | 2 | 22  | 20371  | 1  | 72.86  |
| 168 | 1_WT.nd2 | 2 | 23  | 21270  | 1  | 32     |
| 169 | 1_WT.nd2 | 2 | 24  | 17371  | 1  | 72.42  |
| 170 | 1_WT.nd2 | 2 | 25  | 23157  | 1  | 27.46  |
| 171 | 1_WT.nd2 | 2 | 26  | 21675  | 1  | 22.63  |

|     |          |   |    |        |    |        |
|-----|----------|---|----|--------|----|--------|
| 172 | 1_WT.nd2 | 2 | 27 | 44849  | 2  | 15.3   |
| 173 | 1_WT.nd2 | 2 | 28 | 24166  | 1  | 16.55  |
| 174 | 1_WT.nd2 | 2 | 29 | 49291  | 2  | 16.55  |
| 175 | 1_WT.nd2 | 2 | 30 | 18888  | 1  | 42.2   |
| 176 | 1_WT.nd2 | 2 | 31 | 55005  | 3  | 19.1   |
| 177 | 1_WT.nd2 | 2 | 32 | 24092  | 1  | 1      |
| 178 | 1_WT.nd2 | 2 | 33 | 17997  | 1  | 79.08  |
| 179 | 1_WT.nd2 | 2 | 34 | 23526  | 1  | 25     |
| 180 | 1_WT.nd2 | 2 | 35 | 18616  | 1  | 114.81 |
| 181 | 1_WT.nd2 | 2 | 36 | 25437  | 1  | 41.44  |
| 182 | 1_WT.nd2 | 2 | 37 | 39386  | 2  | 39.05  |
| 183 | 1_WT.nd2 | 2 | 38 | 23882  | 1  | 30.87  |
| 184 | 1_WT.nd2 | 2 | 39 | 35449  | 2  | 19.85  |
| 185 | 1_WT.nd2 | 2 | 40 | 73057  | 4  | 139.29 |
| 186 | 1_WT.nd2 | 2 | 41 | 200618 | 10 | 39.82  |
| 187 | 1_WT.nd2 | 2 | 42 | 36341  | 2  | 47.04  |
| 188 | 1_WT.nd2 | 2 | 43 | 56613  | 3  | 50.99  |
| 189 | 1_WT.nd2 | 2 | 44 | 21716  | 1  | 45.97  |
| 190 | 1_WT.nd2 | 2 | 45 | 37338  | 2  | 56.52  |
| 191 | 1_WT.nd2 | 2 | 46 | 26466  | 1  | 15.23  |
| 192 | 1_WT.nd2 | 2 | 47 | 34542  | 2  | 33.53  |
| 193 | 1_WT.nd2 | 2 | 48 | 18914  | 1  | 29.61  |
| 194 | 1_WT.nd2 | 2 | 49 | 29766  | 1  | 42.76  |
| 195 | 1_WT.nd2 | 2 | 50 | 20551  | 1  | 51     |
| 196 | 1_WT.nd2 | 2 | 51 | 27554  | 1  | 60.03  |
| 197 | 1_WT.nd2 | 2 | 52 | 19951  | 1  | 65.3   |
| 198 | 1_WT.nd2 | 2 | 53 | 262460 | 13 | 65.8   |
| 199 | 1_WT.nd2 | 2 | 54 | 22806  | 1  | 67.36  |
| 200 | 1_WT.nd2 | 2 | 55 | 20598  | 1  | 222.87 |
| 201 | 1_WT.nd2 | 2 | 56 | 33616  | 2  | 60.21  |
| 202 | 1_WT.nd2 | 2 | 57 | 23942  | 1  | 15.26  |
| 203 | 1_WT.nd2 | 2 | 58 | 23529  | 1  | 142.17 |
| 204 | 1_WT.nd2 | 2 | 59 | 20484  | 1  | 34     |
| 205 | 1_WT.nd2 | 2 | 60 | 41264  | 2  | 42.19  |
| 206 | 1_WT.nd2 | 2 | 61 | 27924  | 1  | 42.95  |
| 207 | 1_WT.nd2 | 2 | 62 | 66314  | 3  | 134.65 |
| 208 | 1_WT.nd2 | 2 | 63 | 64629  | 3  | 15.65  |
| 209 | 1_WT.nd2 | 2 | 64 | 25948  | 1  | 10.82  |
| 210 | 1_WT.nd2 | 2 | 65 | 477091 | 24 | 37.05  |
| 211 | 1_WT.nd2 | 2 | 66 | 18985  | 1  | 43.01  |
| 212 | 1_WT.nd2 | 2 | 67 | 22081  | 1  | 175    |
| 213 | 1_WT.nd2 | 2 | 68 | 20505  | 1  | 37.54  |
| 214 | 1_WT.nd2 | 2 | 69 | 21272  | 1  | 30.41  |

|     |          |   |     |        |    |       |
|-----|----------|---|-----|--------|----|-------|
| 215 | 1_WT.nd2 | 2 | 70  | 197020 | 10 | 76.66 |
| 216 | 1_WT.nd2 | 2 | 71  | 106249 | 5  | 33.94 |
| 217 | 1_WT.nd2 | 2 | 72  | 22801  | 1  | 54.74 |
| 218 | 1_WT.nd2 | 2 | 73  | 20236  | 1  | 34.79 |
| 219 | 1_WT.nd2 | 2 | 74  | 20550  | 1  | 50.22 |
| 220 | 1_WT.nd2 | 2 | 75  | 27676  | 1  | 57.8  |
| 221 | 1_WT.nd2 | 2 | 76  | 20302  | 1  | 34.41 |
| 222 | 1_WT.nd2 | 2 | 77  | 18190  | 1  | 22.36 |
| 223 | 1_WT.nd2 | 2 | 78  | 56193  | 3  | 40.16 |
| 224 | 1_WT.nd2 | 2 | 79  | 21507  | 1  | 53.04 |
| 225 | 1_WT.nd2 | 2 | 80  | 19555  | 1  | 21.95 |
| 226 | 1_WT.nd2 | 2 | 81  | 55802  | 3  | 33.3  |
| 227 | 1_WT.nd2 | 2 | 82  | 20670  | 1  | 56.92 |
| 228 | 1_WT.nd2 | 2 | 83  | 26267  | 1  | 65.76 |
| 229 | 1_WT.nd2 | 2 | 84  | 20806  | 1  | 27.46 |
| 230 | 1_WT.nd2 | 2 | 85  | 21584  | 1  | 67.42 |
| 231 | 1_WT.nd2 | 2 | 86  | 23930  | 1  | 19.42 |
| 232 | 1_WT.nd2 | 2 | 87  | 20875  | 1  | 13.34 |
| 233 | 1_WT.nd2 | 2 | 88  | 57123  | 3  | 0     |
| 234 | 1_WT.nd2 | 2 | 89  | 21219  | 1  | 37.66 |
| 235 | 1_WT.nd2 | 2 | 90  | 23070  | 1  | 21.93 |
| 236 | 1_WT.nd2 | 2 | 91  | 18494  | 1  | 47.54 |
| 237 | 1_WT.nd2 | 2 | 92  | 59314  | 3  | 0     |
| 238 | 1_WT.nd2 | 2 | 93  | 21436  | 1  | 32.02 |
| 239 | 1_WT.nd2 | 2 | 94  | 19482  | 1  | 13    |
| 240 | 1_WT.nd2 | 2 | 95  | 22954  | 1  | 38.64 |
| 241 | 1_WT.nd2 | 2 | 96  | 26563  | 1  | 40.26 |
| 242 | 1_WT.nd2 | 2 | 97  | 36925  | 2  | 56.08 |
| 243 | 1_WT.nd2 | 2 | 98  | 18955  | 1  | 62.51 |
| 244 | 1_WT.nd2 | 2 | 99  | 26717  | 1  | 69.05 |
| 245 | 1_WT.nd2 | 2 | 100 | 340454 | 17 | 62.63 |
| 246 | 1_WT.nd2 | 2 | 101 | 24801  | 1  | 69.26 |
| 247 | 1_WT.nd2 | 2 | 102 | 20008  | 1  | 51.55 |
| 248 | 1_WT.nd2 | 2 | 103 | 48490  | 2  | 66.75 |
| 249 | 1_WT.nd2 | 2 | 104 | 42382  | 2  | 65.28 |
| 250 | 1_WT.nd2 | 2 | 105 | 21624  | 1  | 28.16 |
| 251 | 1_WT.nd2 | 2 | 106 | 32564  | 2  | 63.03 |
| 252 | 1_WT.nd2 | 2 | 107 | 31358  | 2  | 3.61  |
| 253 | 1_WT.nd2 | 2 | 108 | 43570  | 2  | 64    |
| 254 | 1_WT.nd2 | 2 | 109 | 64868  | 3  | 71.03 |
| 255 | 1_WT.nd2 | 2 | 110 | 33357  | 2  | 83.1  |
| 256 | 1_WT.nd2 | 2 | 111 | 16982  | 1  | 19.72 |
| 257 | 1_WT.nd2 | 2 | 112 | 33777  | 2  | 38.33 |

|     |          |   |     |         |    |        |
|-----|----------|---|-----|---------|----|--------|
| 258 | 1_WT.nd2 | 2 | 113 | 20613   | 1  | 48     |
| 259 | 1_WT.nd2 | 2 | 114 | 22893   | 1  | 84.9   |
| 260 | 1_WT.nd2 | 2 | 115 | 19434   | 1  | 14.04  |
| 261 | 1_WT.nd2 | 2 | 116 | 57178   | 3  | 88     |
| 262 | 1_WT.nd2 | 2 | 117 | 38510   | 2  | 88.36  |
| 263 | 1_WT.nd2 | 2 | 118 | 135824  | 7  | 72.25  |
| 264 | 1_WT.nd2 | 2 | 119 | 21896   | 1  | 38.21  |
| 265 | 1_WT.nd2 | 2 | 120 | 21164   | 1  | 3.61   |
| 266 | 1_WT.nd2 | 2 | 121 | 165430  | 8  | 0      |
| 267 | 1_WT.nd2 | 2 | 122 | 484803  | 24 | 89.27  |
| 268 | 1_WT.nd2 | 2 | 123 | 819531  | 41 | 43.97  |
| 269 | 1_WT.nd2 | 2 | 124 | 150221  | 7  | 94.43  |
| 270 | 1_WT.nd2 | 2 | 125 | 625787  | 31 | 72.57  |
| 271 | 1_WT.nd2 | 2 | 126 | 41661   | 2  | 58.69  |
| 272 | 1_WT.nd2 | 2 | 127 | 65711   | 3  | 97.02  |
| 273 | 1_WT.nd2 | 2 | 128 | 22282   | 1  | 55.22  |
| 274 | 1_WT.nd2 | 2 | 129 | 37663   | 2  | 92.59  |
| 275 | 1_WT.nd2 | 2 | 130 | 28293   | 1  | 44.27  |
| 276 | 1_WT.nd2 | 2 | 131 | 1004537 | 50 | 69.92  |
| 277 | 1_WT.nd2 | 2 | 132 | 946529  | 47 | 93.15  |
| 278 | 1_WT.nd2 | 2 | 133 | 21475   | 1  | 18.79  |
| 279 | 1_WT.nd2 | 2 | 134 | 22698   | 1  | 98.84  |
| 280 | 1_WT.nd2 | 2 | 135 | 22778   | 1  | 47.3   |
| 281 | 1_WT.nd2 | 2 | 136 | 115620  | 6  | 58.25  |
| 282 | 1_WT.nd2 | 2 | 137 | 23101   | 1  | 29.68  |
| 283 | 1_WT.nd2 | 2 | 138 | 27860   | 1  | 61.07  |
| 284 | 1_WT.nd2 | 2 | 139 | 31503   | 2  | 59.82  |
| 285 | 1_WT.nd2 | 2 | 140 | 17971   | 1  | 17.46  |
| 286 | 1_WT.nd2 | 2 | 141 | 22252   | 1  | 58.6   |
| 287 | 1_WT.nd2 | 2 | 142 | 22674   | 1  | 56.04  |
| 288 | 1_WT.nd2 | 2 | 143 | 21680   | 1  | 100.57 |
| 289 | 1_WT.nd2 | 2 | 144 | 17885   | 1  | 108.41 |
| 290 | 1_WT.nd2 | 2 | 145 | 42954   | 2  | 77.8   |
| 291 | 1_WT.nd2 | 2 | 146 | 22061   | 1  | 85.91  |
| 292 | 1_WT.nd2 | 3 | 1   | 18193   | 1  | 89.04  |
| 293 | 1_WT.nd2 | 3 | 2   | 19811   | 1  | 0      |
| 294 | 1_WT.nd2 | 3 | 3   | 25343   | 1  | 40.45  |
| 295 | 1_WT.nd2 | 3 | 4   | 48738   | 2  | 26.68  |
| 296 | 1_WT.nd2 | 3 | 5   | 22093   | 1  | 20.81  |
| 297 | 1_WT.nd2 | 3 | 6   | 250622  | 12 | 18.38  |
| 298 | 1_WT.nd2 | 3 | 7   | 19787   | 1  | 5.83   |
| 299 | 1_WT.nd2 | 3 | 8   | 19314   | 1  | 12.37  |
| 300 | 1_WT.nd2 | 3 | 9   | 40042   | 2  | 10     |

|     |          |   |    |        |    |        |
|-----|----------|---|----|--------|----|--------|
| 301 | 1_WT.nd2 | 3 | 10 | 21508  | 1  | 43.84  |
| 302 | 1_WT.nd2 | 3 | 11 | 19549  | 1  | 90.44  |
| 303 | 1_WT.nd2 | 3 | 12 | 19873  | 1  | 105.68 |
| 304 | 1_WT.nd2 | 3 | 13 | 21437  | 1  | 51.16  |
| 305 | 1_WT.nd2 | 3 | 14 | 21533  | 1  | 77.9   |
| 306 | 1_WT.nd2 | 3 | 15 | 20499  | 1  | 93.17  |
| 307 | 1_WT.nd2 | 3 | 16 | 20240  | 1  | 31.91  |
| 308 | 1_WT.nd2 | 3 | 17 | 19939  | 1  | 13.6   |
| 309 | 1_WT.nd2 | 3 | 18 | 33337  | 2  | 73.08  |
| 310 | 1_WT.nd2 | 3 | 19 | 20324  | 1  | 28.43  |
| 311 | 1_WT.nd2 | 3 | 20 | 22772  | 1  | 123.69 |
| 312 | 1_WT.nd2 | 3 | 21 | 21021  | 1  | 58     |
| 313 | 1_WT.nd2 | 3 | 22 | 372288 | 19 | 18.87  |
| 314 | 1_WT.nd2 | 3 | 23 | 17382  | 1  | 114.14 |
| 315 | 1_WT.nd2 | 3 | 24 | 22164  | 1  | 33.24  |
| 316 | 1_WT.nd2 | 3 | 25 | 20545  | 1  | 39.56  |
| 317 | 1_WT.nd2 | 3 | 26 | 22083  | 1  | 0      |
| 318 | 1_WT.nd2 | 3 | 27 | 27479  | 1  | 9.06   |
| 319 | 1_WT.nd2 | 3 | 28 | 23996  | 1  | 47.51  |
| 320 | 1_WT.nd2 | 3 | 29 | 22201  | 1  | 72.06  |
| 321 | 1_WT.nd2 | 3 | 30 | 23477  | 1  | 86.45  |
| 322 | 1_WT.nd2 | 3 | 31 | 50185  | 2  | 9.22   |
| 323 | 1_WT.nd2 | 3 | 32 | 35274  | 2  | 10.3   |
| 324 | 1_WT.nd2 | 3 | 33 | 22142  | 1  | 14.21  |
| 325 | 1_WT.nd2 | 3 | 34 | 37859  | 2  | 45.35  |
| 326 | 1_WT.nd2 | 3 | 35 | 21222  | 1  | 16.28  |
| 327 | 1_WT.nd2 | 3 | 36 | 107721 | 5  | 32.25  |
| 328 | 1_WT.nd2 | 3 | 37 | 29789  | 1  | 35.47  |
| 329 | 1_WT.nd2 | 3 | 38 | 17351  | 1  | 46.14  |
| 330 | 1_WT.nd2 | 3 | 39 | 17977  | 1  | 86.35  |
| 331 | 1_WT.nd2 | 3 | 40 | 144866 | 7  | 30.53  |
| 332 | 1_WT.nd2 | 3 | 41 | 20338  | 1  | 57.98  |
| 333 | 1_WT.nd2 | 3 | 42 | 22552  | 1  | 24.19  |
| 334 | 1_WT.nd2 | 3 | 43 | 77821  | 4  | 26.68  |
| 335 | 1_WT.nd2 | 3 | 44 | 21777  | 1  | 67.2   |
| 336 | 1_WT.nd2 | 3 | 45 | 566953 | 28 | 24.76  |
| 337 | 1_WT.nd2 | 3 | 46 | 55578  | 3  | 26.17  |
| 338 | 1_WT.nd2 | 3 | 47 | 39833  | 2  | 29.7   |
| 339 | 1_WT.nd2 | 3 | 48 | 17593  | 1  | 37.8   |
| 340 | 1_WT.nd2 | 3 | 49 | 117987 | 6  | 28.32  |
| 341 | 1_WT.nd2 | 3 | 50 | 112314 | 6  | 24.76  |
| 342 | 1_WT.nd2 | 3 | 51 | 55734  | 3  | 29.41  |
| 343 | 1_WT.nd2 | 3 | 52 | 26004  | 1  | 43.05  |



|     |          |   |    |        |    |       |
|-----|----------|---|----|--------|----|-------|
| 344 | 1_WT.nd2 | 3 | 53 | 45570  | 2  | 26.08 |
| 345 | 1_WT.nd2 | 3 | 54 | 22009  | 1  | 65.15 |
| 346 | 1_WT.nd2 | 3 | 55 | 70006  | 3  | 24.84 |
| 347 | 1_WT.nd2 | 3 | 56 | 21341  | 1  | 88.32 |
| 348 | 1_WT.nd2 | 3 | 57 | 23219  | 1  | 8.06  |
| 349 | 1_WT.nd2 | 3 | 58 | 73453  | 4  | 26.25 |
| 350 | 1_WT.nd2 | 3 | 59 | 55714  | 3  | 15.52 |
| 351 | 1_WT.nd2 | 3 | 60 | 32734  | 2  | 21.95 |
| 352 | 1_WT.nd2 | 3 | 61 | 23354  | 1  | 9.43  |
| 353 | 1_WT.nd2 | 3 | 62 | 109506 | 5  | 0     |
| 354 | 1_WT.nd2 | 3 | 63 | 54327  | 3  | 16.76 |
| 355 | 1_WT.nd2 | 3 | 64 | 25826  | 1  | 58.22 |
| 356 | 1_WT.nd2 | 3 | 65 | 63623  | 3  | 0     |
| 357 | 1_WT.nd2 | 3 | 66 | 19720  | 1  | 0     |
| 358 | 1_WT.nd2 | 3 | 67 | 60326  | 3  | 16.12 |
| 359 | 1_WT.nd2 | 3 | 68 | 58520  | 3  | 12    |
| 360 | 1_WT.nd2 | 3 | 69 | 65500  | 3  | 6     |
| 361 | 1_WT.nd2 | 3 | 70 | 26699  | 1  | 70.21 |
| 362 | 1_WT.nd2 | 3 | 71 | 22417  | 1  | 56.04 |
| 363 | 1_WT.nd2 | 3 | 72 | 35089  | 2  | 9     |
| 364 | 1_WT.nd2 | 3 | 73 | 45315  | 2  | 0     |
| 365 | 1_WT.nd2 | 3 | 74 | 45957  | 2  | 6.08  |
| 366 | 1_WT.nd2 | 3 | 75 | 39302  | 2  | 2.83  |
| 367 | 1_WT.nd2 | 3 | 76 | 29852  | 1  | 1     |
| 368 | 1_WT.nd2 | 3 | 77 | 107407 | 5  | 2     |
| 369 | 1_WT.nd2 | 3 | 78 | 36757  | 2  | 7.07  |
| 370 | 1_WT.nd2 | 3 | 79 | 30440  | 2  | 5.83  |
| 371 | 1_WT.nd2 | 3 | 80 | 23876  | 1  | 0     |
| 372 | 1_WT.nd2 | 3 | 81 | 32049  | 2  | 20.12 |
| 373 | 1_WT.nd2 | 3 | 82 | 27264  | 1  | 54.15 |
| 374 | 1_WT.nd2 | 3 | 83 | 54532  | 3  | 1.41  |
| 375 | 1_WT.nd2 | 3 | 84 | 413825 | 21 | 7.07  |
| 376 | 1_WT.nd2 | 3 | 85 | 18837  | 1  | 5.1   |
| 377 | 1_WT.nd2 | 3 | 86 | 20871  | 1  | 4.12  |
| 378 | 1_WT.nd2 | 3 | 87 | 19124  | 1  | 10    |
| 379 | 1_WT.nd2 | 3 | 88 | 16746  | 1  | 11.18 |
| 380 | 1_WT.nd2 | 3 | 89 | 115743 | 6  | 33.54 |
| 381 | 1_WT.nd2 | 3 | 90 | 34471  | 2  | 16    |
| 382 | 1_WT.nd2 | 3 | 91 | 20838  | 1  | 28.16 |
| 383 | 1_WT.nd2 | 3 | 92 | 20699  | 1  | 21.63 |
| 384 | 1_WT.nd2 | 3 | 93 | 37286  | 2  | 18.11 |
| 385 | 1_WT.nd2 | 3 | 94 | 62560  | 3  | 23.09 |
| 386 | 1_WT.nd2 | 3 | 95 | 23734  | 1  | 82.76 |

|     |          |   |     |        |    |       |
|-----|----------|---|-----|--------|----|-------|
| 387 | 1_WT.nd2 | 3 | 96  | 49964  | 2  | 27    |
| 388 | 1_WT.nd2 | 3 | 97  | 21765  | 1  | 35.36 |
| 389 | 1_WT.nd2 | 3 | 98  | 22800  | 1  | 37.54 |
| 390 | 1_WT.nd2 | 3 | 99  | 32803  | 2  | 32.56 |
| 391 | 1_WT.nd2 | 3 | 100 | 60196  | 3  | 32.02 |
| 392 | 1_WT.nd2 | 3 | 101 | 24645  | 1  | 32.02 |
| 393 | 1_WT.nd2 | 3 | 102 | 62908  | 3  | 32.39 |
| 394 | 1_WT.nd2 | 3 | 103 | 48527  | 2  | 36.01 |
| 395 | 1_WT.nd2 | 3 | 104 | 20541  | 1  | 38.47 |
| 396 | 1_WT.nd2 | 3 | 105 | 47666  | 2  | 38.01 |
| 397 | 1_WT.nd2 | 3 | 106 | 27914  | 1  | 67.36 |
| 398 | 1_WT.nd2 | 3 | 107 | 47321  | 2  | 42.11 |
| 399 | 1_WT.nd2 | 3 | 108 | 20390  | 1  | 43.93 |
| 400 | 1_WT.nd2 | 3 | 109 | 57970  | 3  | 29.07 |
| 401 | 1_WT.nd2 | 3 | 110 | 301819 | 15 | 47.17 |
| 402 | 1_WT.nd2 | 3 | 111 | 23019  | 1  | 49.82 |
| 403 | 1_WT.nd2 | 3 | 112 | 22218  | 1  | 53.34 |
| 404 | 1_WT.nd2 | 3 | 113 | 46095  | 2  | 52.09 |
| 405 | 1_WT.nd2 | 3 | 114 | 21240  | 1  | 27.07 |
| 406 | 1_WT.nd2 | 3 | 115 | 28937  | 1  | 56.01 |
| 407 | 1_WT.nd2 | 3 | 116 | 21316  | 1  | 18.68 |
| 408 | 1_WT.nd2 | 3 | 117 | 18386  | 1  | 93.86 |
| 409 | 1_WT.nd2 | 3 | 118 | 20972  | 1  | 41.15 |
| 410 | 1_WT.nd2 | 3 | 119 | 44791  | 2  | 63.01 |
| 411 | 1_WT.nd2 | 3 | 120 | 18519  | 1  | 63.64 |
| 412 | 1_WT.nd2 | 3 | 121 | 20624  | 1  | 15.3  |
| 413 | 1_WT.nd2 | 3 | 122 | 27182  | 1  | 68.47 |
| 414 | 1_WT.nd2 | 3 | 123 | 21546  | 1  | 53.31 |
| 415 | 1_WT.nd2 | 3 | 124 | 20057  | 1  | 99.72 |
| 416 | 1_WT.nd2 | 3 | 125 | 22705  | 1  | 26.17 |
| 417 | 1_WT.nd2 | 3 | 126 | 19760  | 1  | 57.28 |
| 418 | 1_WT.nd2 | 3 | 127 | 19234  | 1  | 10.82 |
| 419 | 1_WT.nd2 | 3 | 128 | 25417  | 1  | 7.81  |
| 420 | 1_WT.nd2 | 3 | 129 | 19996  | 1  | 50.25 |
| 421 | 1_WT.nd2 | 3 | 130 | 270594 | 13 | 20.02 |
| 422 | 1_WT.nd2 | 3 | 131 | 28308  | 1  | 0     |
| 423 | 1_WT.nd2 | 3 | 132 | 16631  | 1  | 7.07  |
| 424 | 1_WT.nd2 | 3 | 133 | 22415  | 1  | 21.93 |
| 425 | 1_WT.nd2 | 3 | 134 | 21132  | 1  | 58.69 |
| 426 | 1_WT.nd2 | 3 | 135 | 23708  | 1  | 45.31 |
| 427 | 1_WT.nd2 | 3 | 136 | 28570  | 1  | 66.48 |
| 428 | 1_WT.nd2 | 3 | 137 | 20993  | 1  | 43.38 |
| 429 | 1_WT.nd2 | 3 | 138 | 23200  | 1  | 9.22  |

|     |          |   |     |        |   |        |
|-----|----------|---|-----|--------|---|--------|
| 430 | 1_WT.nd2 | 3 | 139 | 21024  | 1 | 32.76  |
| 431 | 1_WT.nd2 | 3 | 140 | 37715  | 2 | 2.24   |
| 432 | 1_WT.nd2 | 3 | 141 | 127371 | 6 | 18.25  |
| 433 | 1_WT.nd2 | 3 | 142 | 17274  | 1 | 109.66 |
| 434 | 1_WT.nd2 | 3 | 143 | 47380  | 2 | 50.25  |
| 435 | 1_WT.nd2 | 3 | 144 | 16833  | 1 | 89.59  |
| 436 | 1_WT.nd2 | 3 | 145 | 29600  | 1 | 84.63  |
| 437 | 1_WT.nd2 | 3 | 146 | 18262  | 1 | 120.74 |
| 438 | 1_WT.nd2 | 3 | 147 | 78156  | 4 | 41.19  |
| 439 | 1_WT.nd2 | 3 | 148 | 17997  | 1 | 73.25  |
| 440 | 1_WT.nd2 | 3 | 149 | 24682  | 1 | 64.54  |
| 441 | 1_WT.nd2 | 3 | 150 | 161066 | 8 | 47     |
| 442 | 1_WT.nd2 | 3 | 151 | 89776  | 4 | 47.2   |
| 443 | 1_WT.nd2 | 3 | 152 | 136791 | 7 | 50.01  |
| 444 | 1_WT.nd2 | 3 | 153 | 22734  | 1 | 77.88  |
| 445 | 1_WT.nd2 | 3 | 154 | 54962  | 3 | 58     |
| 446 | 1_WT.nd2 | 3 | 155 | 144458 | 7 | 58.55  |
| 447 | 1_WT.nd2 | 3 | 156 | 149822 | 7 | 59.03  |
| 448 | 1_WT.nd2 | 3 | 157 | 101989 | 5 | 61.03  |
| 449 | 1_WT.nd2 | 3 | 158 | 144614 | 7 | 60.54  |
| 450 | 1_WT.nd2 | 3 | 159 | 19473  | 1 | 120.21 |
| 451 | 1_WT.nd2 | 3 | 160 | 23571  | 1 | 76.03  |
| 452 | 1_WT.nd2 | 3 | 161 | 68150  | 3 | 69.35  |
| 453 | 1_WT.nd2 | 3 | 162 | 71094  | 4 | 73.5   |
| 454 | 1_WT.nd2 | 3 | 163 | 123822 | 6 | 76.32  |
| 455 | 1_WT.nd2 | 3 | 164 | 20861  | 1 | 89.81  |
| 456 | 1_WT.nd2 | 3 | 165 | 28206  | 1 | 81.41  |
| 457 | 1_WT.nd2 | 3 | 166 | 19501  | 1 | 109.84 |
| 458 | 1_WT.nd2 | 3 | 167 | 28847  | 1 | 56.01  |
| 459 | 1_WT.nd2 | 3 | 168 | 138678 | 7 | 64.88  |
| 460 | 1_WT.nd2 | 3 | 169 | 21655  | 1 | 129.2  |
| 461 | 1_WT.nd2 | 3 | 170 | 19400  | 1 | 124.46 |
| 462 | 1_WT.nd2 | 3 | 171 | 18212  | 1 | 101.95 |
| 463 | 1_WT.nd2 | 3 | 172 | 19270  | 1 | 132.74 |
| 464 | 1_WT.nd2 | 3 | 173 | 18228  | 1 | 160.33 |
| 465 | 1_WT.nd2 | 3 | 174 | 28042  | 1 | 87.64  |
| 466 | 1_WT.nd2 | 3 | 175 | 45829  | 2 | 65.12  |
| 467 | 1_WT.nd2 | 3 | 176 | 20282  | 1 | 117.55 |
| 468 | 1_WT.nd2 | 3 | 177 | 19481  | 1 | 101.4  |
| 469 | 1_WT.nd2 | 4 | 1   | 19830  | 1 | 46.75  |
| 470 | 1_WT.nd2 | 4 | 2   | 18161  | 1 | 10.63  |
| 471 | 1_WT.nd2 | 4 | 3   | 16819  | 1 | 33.3   |
| 472 | 1_WT.nd2 | 4 | 4   | 22772  | 1 | 49.24  |

|     |          |   |    |        |    |        |
|-----|----------|---|----|--------|----|--------|
| 473 | 1_WT.nd2 | 4 | 5  | 22363  | 1  | 18     |
| 474 | 1_WT.nd2 | 4 | 6  | 20406  | 1  | 34.67  |
| 475 | 1_WT.nd2 | 4 | 7  | 20551  | 1  | 106.78 |
| 476 | 1_WT.nd2 | 4 | 8  | 321003 | 16 | 103.08 |
| 477 | 1_WT.nd2 | 4 | 9  | 19999  | 1  | 56.04  |
| 478 | 1_WT.nd2 | 4 | 10 | 92715  | 5  | 95.78  |
| 479 | 1_WT.nd2 | 4 | 11 | 38017  | 2  | 92.42  |
| 480 | 1_WT.nd2 | 4 | 12 | 19210  | 1  | 58.31  |
| 481 | 1_WT.nd2 | 4 | 13 | 82544  | 4  | 29.02  |
| 482 | 1_WT.nd2 | 4 | 14 | 19330  | 1  | 112.38 |
| 483 | 1_WT.nd2 | 4 | 15 | 18522  | 1  | 17.49  |
| 484 | 1_WT.nd2 | 4 | 16 | 19223  | 1  | 0      |
| 485 | 1_WT.nd2 | 4 | 17 | 37505  | 2  | 58.52  |
| 486 | 1_WT.nd2 | 4 | 18 | 23489  | 1  | 52.17  |
| 487 | 1_WT.nd2 | 4 | 19 | 17499  | 1  | 89.5   |
| 488 | 1_WT.nd2 | 4 | 20 | 23484  | 1  | 29     |
| 489 | 1_WT.nd2 | 4 | 21 | 18708  | 1  | 82.81  |
| 490 | 1_WT.nd2 | 4 | 22 | 31017  | 2  | 58.69  |
| 491 | 1_WT.nd2 | 4 | 23 | 23149  | 1  | 18     |
| 492 | 1_WT.nd2 | 4 | 24 | 20480  | 1  | 82.07  |
| 493 | 1_WT.nd2 | 4 | 25 | 24582  | 1  | 0      |
| 494 | 1_WT.nd2 | 4 | 26 | 99332  | 5  | 7.28   |
| 495 | 1_WT.nd2 | 4 | 27 | 24157  | 1  | 82.81  |
| 496 | 1_WT.nd2 | 4 | 28 | 22944  | 1  | 15.23  |
| 497 | 1_WT.nd2 | 4 | 29 | 62704  | 3  | 5.39   |
| 498 | 1_WT.nd2 | 4 | 30 | 25541  | 1  | 36.06  |
| 499 | 1_WT.nd2 | 4 | 31 | 82579  | 4  | 8.54   |
| 500 | 1_WT.nd2 | 4 | 32 | 24502  | 1  | 33.84  |
| 501 | 1_WT.nd2 | 4 | 33 | 30348  | 2  | 15     |
| 502 | 1_WT.nd2 | 4 | 34 | 21271  | 1  | 20     |
| 503 | 1_WT.nd2 | 4 | 35 | 23286  | 1  | 26     |
| 504 | 1_WT.nd2 | 4 | 36 | 30316  | 2  | 14.04  |
| 505 | 1_WT.nd2 | 4 | 37 | 77688  | 4  | 9.49   |
| 506 | 1_WT.nd2 | 4 | 38 | 368250 | 18 | 30.15  |
| 507 | 1_WT.nd2 | 4 | 39 | 93992  | 5  | 6.4    |
| 508 | 1_WT.nd2 | 4 | 40 | 118549 | 6  | 6.32   |
| 509 | 1_WT.nd2 | 4 | 41 | 19814  | 1  | 67.27  |
| 510 | 1_WT.nd2 | 4 | 42 | 27276  | 1  | 32.53  |
| 511 | 1_WT.nd2 | 4 | 43 | 165757 | 8  | 8.25   |
| 512 | 1_WT.nd2 | 4 | 44 | 23050  | 1  | 44.2   |
| 513 | 1_WT.nd2 | 4 | 45 | 37022  | 2  | 6.4    |
| 514 | 1_WT.nd2 | 4 | 46 | 636123 | 32 | 11.18  |
| 515 | 1_WT.nd2 | 4 | 47 | 24242  | 1  | 12.04  |

|     |          |   |    |        |    |        |
|-----|----------|---|----|--------|----|--------|
| 516 | 1_WT.nd2 | 4 | 48 | 32095  | 2  | 0      |
| 517 | 1_WT.nd2 | 4 | 49 | 67567  | 3  | 17.89  |
| 518 | 1_WT.nd2 | 4 | 50 | 23023  | 1  | 0      |
| 519 | 1_WT.nd2 | 4 | 51 | 19854  | 1  | 7.21   |
| 520 | 1_WT.nd2 | 4 | 52 | 35744  | 2  | 48.84  |
| 521 | 1_WT.nd2 | 4 | 53 | 25570  | 1  | 24.7   |
| 522 | 1_WT.nd2 | 4 | 54 | 41721  | 2  | 0      |
| 523 | 1_WT.nd2 | 4 | 55 | 63752  | 3  | 49.41  |
| 524 | 1_WT.nd2 | 4 | 56 | 56216  | 3  | 0      |
| 525 | 1_WT.nd2 | 4 | 57 | 391212 | 19 | 32.76  |
| 526 | 1_WT.nd2 | 4 | 58 | 32014  | 2  | 12.53  |
| 527 | 1_WT.nd2 | 4 | 59 | 27581  | 1  | 43.57  |
| 528 | 1_WT.nd2 | 4 | 60 | 34426  | 2  | 12.04  |
| 529 | 1_WT.nd2 | 4 | 61 | 21371  | 1  | 54.71  |
| 530 | 1_WT.nd2 | 4 | 62 | 24735  | 1  | 8.25   |
| 531 | 1_WT.nd2 | 4 | 63 | 20291  | 1  | 16.12  |
| 532 | 1_WT.nd2 | 4 | 64 | 46850  | 2  | 18.97  |
| 533 | 1_WT.nd2 | 4 | 65 | 22067  | 1  | 27.2   |
| 534 | 1_WT.nd2 | 4 | 66 | 360702 | 18 | 24.04  |
| 535 | 1_WT.nd2 | 4 | 67 | 23247  | 1  | 26     |
| 536 | 1_WT.nd2 | 4 | 68 | 29509  | 1  | 54.2   |
| 537 | 1_WT.nd2 | 4 | 69 | 78698  | 4  | 27.29  |
| 538 | 1_WT.nd2 | 4 | 70 | 85402  | 4  | 33.06  |
| 539 | 1_WT.nd2 | 4 | 71 | 298282 | 15 | 35.69  |
| 540 | 1_WT.nd2 | 4 | 72 | 77194  | 4  | 39     |
| 541 | 1_WT.nd2 | 4 | 73 | 39832  | 2  | 44     |
| 542 | 1_WT.nd2 | 4 | 74 | 19805  | 1  | 24.33  |
| 543 | 1_WT.nd2 | 4 | 75 | 27120  | 1  | 53     |
| 544 | 1_WT.nd2 | 4 | 76 | 84715  | 4  | 54     |
| 545 | 1_WT.nd2 | 4 | 77 | 19143  | 1  | 66.94  |
| 546 | 1_WT.nd2 | 4 | 78 | 24428  | 1  | 17.09  |
| 547 | 1_WT.nd2 | 4 | 79 | 21176  | 1  | 18.36  |
| 548 | 1_WT.nd2 | 4 | 80 | 21043  | 1  | 20.62  |
| 549 | 1_WT.nd2 | 4 | 81 | 80888  | 4  | 36.24  |
| 550 | 1_WT.nd2 | 4 | 82 | 87571  | 4  | 41.73  |
| 551 | 1_WT.nd2 | 4 | 83 | 145171 | 7  | 48.84  |
| 552 | 1_WT.nd2 | 4 | 84 | 193529 | 10 | 59.55  |
| 553 | 1_WT.nd2 | 4 | 85 | 23781  | 1  | 42     |
| 554 | 1_WT.nd2 | 4 | 86 | 124647 | 6  | 70.01  |
| 555 | 1_WT.nd2 | 4 | 87 | 109287 | 5  | 76.37  |
| 556 | 1_WT.nd2 | 4 | 88 | 225093 | 11 | 97.2   |
| 557 | 1_WT.nd2 | 4 | 89 | 39300  | 2  | 80.61  |
| 558 | 1_WT.nd2 | 4 | 90 | 25873  | 1  | 111.22 |

|     |          |   |    |        |    |        |
|-----|----------|---|----|--------|----|--------|
| 559 | 1_WT.nd2 | 4 | 91 | 66049  | 3  | 87.68  |
| 560 | 1_WT.nd2 | 4 | 92 | 19887  | 1  | 82.87  |
| 561 | 1_WT.nd2 | 4 | 93 | 29691  | 1  | 73.08  |
| 562 | 1_WT.nd2 | 4 | 94 | 23566  | 1  | 97.08  |
| 563 | 1_WT.nd2 | 4 | 95 | 38650  | 2  | 87.86  |
| 564 | 1_WT.nd2 | 5 | 1  | 17971  | 1  | 9.85   |
| 565 | 1_WT.nd2 | 5 | 2  | 21896  | 1  | 21.4   |
| 566 | 1_WT.nd2 | 5 | 3  | 22226  | 1  | 16.76  |
| 567 | 1_WT.nd2 | 5 | 4  | 20793  | 1  | 17     |
| 568 | 1_WT.nd2 | 5 | 5  | 20121  | 1  | 33.62  |
| 569 | 1_WT.nd2 | 5 | 6  | 22609  | 1  | 32.25  |
| 570 | 1_WT.nd2 | 5 | 7  | 38965  | 2  | 33.3   |
| 571 | 1_WT.nd2 | 5 | 8  | 24175  | 1  | 29.15  |
| 572 | 1_WT.nd2 | 5 | 9  | 50295  | 3  | 34.66  |
| 573 | 1_WT.nd2 | 5 | 10 | 20125  | 1  | 41.18  |
| 574 | 1_WT.nd2 | 5 | 11 | 281749 | 14 | 46.57  |
| 575 | 1_WT.nd2 | 5 | 12 | 63913  | 3  | 29.07  |
| 576 | 1_WT.nd2 | 5 | 13 | 21763  | 1  | 54.33  |
| 577 | 1_WT.nd2 | 5 | 14 | 20191  | 1  | 112.77 |
| 578 | 1_WT.nd2 | 5 | 15 | 19206  | 1  | 61.01  |
| 579 | 1_WT.nd2 | 5 | 16 | 18679  | 1  | 42.05  |
| 580 | 1_WT.nd2 | 5 | 17 | 19600  | 1  | 59.93  |
| 581 | 1_WT.nd2 | 5 | 18 | 19264  | 1  | 54.2   |
| 582 | 1_WT.nd2 | 5 | 19 | 18546  | 1  | 66.89  |
| 583 | 1_WT.nd2 | 5 | 20 | 19595  | 1  | 81.04  |
| 584 | 1_WT.nd2 | 5 | 21 | 24306  | 1  | 52.89  |
| 585 | 1_WT.nd2 | 5 | 22 | 17414  | 1  | 82.81  |
| 586 | 1_WT.nd2 | 5 | 23 | 23331  | 1  | 0      |
| 587 | 1_WT.nd2 | 5 | 24 | 21619  | 1  | 58.24  |
| 588 | 1_WT.nd2 | 5 | 25 | 20426  | 1  | 77.1   |
| 589 | 1_WT.nd2 | 5 | 26 | 516678 | 26 | 9      |
| 590 | 1_WT.nd2 | 5 | 27 | 41091  | 2  | 6      |
| 591 | 1_WT.nd2 | 5 | 28 | 23047  | 1  | 1      |
| 592 | 1_WT.nd2 | 5 | 29 | 48133  | 2  | 5      |
| 593 | 1_WT.nd2 | 5 | 30 | 19980  | 1  | 60.42  |
| 594 | 1_WT.nd2 | 5 | 31 | 60986  | 3  | 9.22   |
| 595 | 1_WT.nd2 | 5 | 32 | 223899 | 11 | 37.34  |
| 596 | 1_WT.nd2 | 5 | 33 | 26178  | 1  | 16     |
| 597 | 1_WT.nd2 | 5 | 34 | 24843  | 1  | 24.02  |
| 598 | 1_WT.nd2 | 5 | 35 | 19044  | 1  | 59.36  |
| 599 | 1_WT.nd2 | 5 | 36 | 60263  | 3  | 13.6   |
| 600 | 1_WT.nd2 | 5 | 37 | 96902  | 5  | 10.63  |
| 601 | 1_WT.nd2 | 5 | 38 | 114084 | 6  | 10.77  |

|     |          |   |    |        |    |       |
|-----|----------|---|----|--------|----|-------|
| 602 | 1_WT.nd2 | 5 | 39 | 22217  | 1  | 4     |
| 603 | 1_WT.nd2 | 5 | 40 | 26521  | 1  | 66.49 |
| 604 | 1_WT.nd2 | 5 | 41 | 127611 | 6  | 13    |
| 605 | 1_WT.nd2 | 5 | 42 | 87266  | 4  | 17    |
| 606 | 1_WT.nd2 | 5 | 43 | 20009  | 1  | 29.07 |
| 607 | 1_WT.nd2 | 5 | 44 | 41413  | 2  | 20    |
| 608 | 1_WT.nd2 | 5 | 45 | 22225  | 1  | 0     |
| 609 | 1_WT.nd2 | 5 | 46 | 40870  | 2  | 24.19 |
| 610 | 1_WT.nd2 | 5 | 47 | 217913 | 11 | 5.83  |
| 611 | 1_WT.nd2 | 5 | 48 | 37556  | 2  | 0     |
| 612 | 1_WT.nd2 | 5 | 49 | 46730  | 2  | 0     |
| 613 | 1_WT.nd2 | 5 | 50 | 20688  | 1  | 35.74 |
| 614 | 1_WT.nd2 | 5 | 51 | 34296  | 2  | 12.08 |
| 615 | 1_WT.nd2 | 5 | 52 | 22431  | 1  | 2     |
| 616 | 1_WT.nd2 | 5 | 53 | 26321  | 1  | 45.88 |
| 617 | 1_WT.nd2 | 5 | 54 | 20673  | 1  | 0     |
| 618 | 1_WT.nd2 | 5 | 55 | 46979  | 2  | 8.94  |
| 619 | 1_WT.nd2 | 5 | 56 | 27440  | 1  | 8.54  |
| 620 | 1_WT.nd2 | 5 | 57 | 17504  | 1  | 20.52 |
| 621 | 1_WT.nd2 | 5 | 58 | 45009  | 2  | 18.03 |
| 622 | 1_WT.nd2 | 5 | 59 | 23599  | 1  | 46.87 |
| 623 | 1_WT.nd2 | 5 | 60 | 37225  | 2  | 24.04 |
| 624 | 1_WT.nd2 | 5 | 61 | 56173  | 3  | 55.44 |
| 625 | 1_WT.nd2 | 5 | 62 | 86708  | 4  | 27.66 |
| 626 | 1_WT.nd2 | 5 | 63 | 22176  | 1  | 40.16 |
| 627 | 1_WT.nd2 | 5 | 64 | 18245  | 1  | 55.44 |
| 628 | 1_WT.nd2 | 5 | 65 | 22044  | 1  | 47    |
| 629 | 1_WT.nd2 | 5 | 66 | 389965 | 19 | 55    |
| 630 | 1_WT.nd2 | 5 | 67 | 30510  | 2  | 60    |
| 631 | 1_WT.nd2 | 5 | 68 | 20121  | 1  | 76.49 |
| 632 | 1_WT.nd2 | 5 | 69 | 17362  | 1  | 15    |
| 633 | 1_WT.nd2 | 5 | 70 | 24643  | 1  | 47.42 |
| 634 | 1_WT.nd2 | 5 | 71 | 21944  | 1  | 37    |
| 635 | 1_WT.nd2 | 5 | 72 | 20563  | 1  | 25    |
| 636 | 1_WT.nd2 | 5 | 73 | 76108  | 4  | 38.28 |
| 637 | 1_WT.nd2 | 5 | 74 | 94776  | 5  | 43.28 |
| 638 | 1_WT.nd2 | 5 | 75 | 19597  | 1  | 49.65 |
| 639 | 1_WT.nd2 | 5 | 76 | 96558  | 5  | 50.91 |
| 640 | 1_WT.nd2 | 5 | 77 | 91723  | 5  | 60.88 |
| 641 | 1_WT.nd2 | 5 | 78 | 22079  | 1  | 46.17 |
| 642 | 1_WT.nd2 | 5 | 79 | 45872  | 2  | 65.76 |
| 643 | 1_WT.nd2 | 5 | 80 | 81426  | 4  | 72.14 |
| 644 | 1_WT.nd2 | 5 | 81 | 130180 | 6  | 77.78 |

|     |          |   |    |        |    |        |
|-----|----------|---|----|--------|----|--------|
| 645 | 1_WT.nd2 | 5 | 82 | 22784  | 1  | 84.53  |
| 646 | 1_WT.nd2 | 5 | 83 | 21519  | 1  | 88.41  |
| 647 | 1_WT.nd2 | 5 | 84 | 413524 | 21 | 92.02  |
| 648 | 1_WT.nd2 | 5 | 85 | 19247  | 1  | 90.09  |
| 649 | 1_WT.nd2 | 5 | 86 | 20362  | 1  | 78.77  |
| 650 | 1_WT.nd2 | 5 | 87 | 18683  | 1  | 127.58 |
| 651 | 1_WT.nd2 | 6 | 1  | 16219  | 1  | 9.43   |
| 652 | 1_WT.nd2 | 6 | 2  | 19950  | 1  | 10.3   |
| 653 | 1_WT.nd2 | 6 | 3  | 21130  | 1  | 122.77 |
| 654 | 1_WT.nd2 | 6 | 4  | 20932  | 1  | 62.94  |
| 655 | 1_WT.nd2 | 6 | 5  | 74961  | 4  | 55.17  |
| 656 | 1_WT.nd2 | 6 | 6  | 636317 | 32 | 46.4   |
| 657 | 1_WT.nd2 | 6 | 7  | 60605  | 3  | 43.28  |
| 658 | 1_WT.nd2 | 6 | 8  | 20572  | 1  | 24.08  |
| 659 | 1_WT.nd2 | 6 | 9  | 71886  | 4  | 39.96  |
| 660 | 1_WT.nd2 | 6 | 10 | 17985  | 1  | 26.08  |
| 661 | 1_WT.nd2 | 6 | 11 | 36742  | 2  | 39.4   |
| 662 | 1_WT.nd2 | 6 | 12 | 19960  | 1  | 116.28 |
| 663 | 1_WT.nd2 | 6 | 13 | 23609  | 1  | 35.36  |
| 664 | 1_WT.nd2 | 6 | 14 | 18479  | 1  | 12.04  |
| 665 | 1_WT.nd2 | 6 | 15 | 21549  | 1  | 2.24   |
| 666 | 1_WT.nd2 | 6 | 16 | 20175  | 1  | 20     |
| 667 | 1_WT.nd2 | 6 | 17 | 21597  | 1  | 33.38  |
| 668 | 1_WT.nd2 | 6 | 18 | 22753  | 1  | 29.27  |
| 669 | 1_WT.nd2 | 6 | 19 | 18064  | 1  | 3.61   |
| 670 | 1_WT.nd2 | 6 | 20 | 30518  | 2  | 25     |
| 671 | 1_WT.nd2 | 6 | 21 | 22279  | 1  | 10.2   |
| 672 | 1_WT.nd2 | 6 | 22 | 16158  | 1  | 146.51 |
| 673 | 1_WT.nd2 | 6 | 23 | 21591  | 1  | 6.71   |
| 674 | 1_WT.nd2 | 6 | 24 | 23528  | 1  | 23.26  |
| 675 | 1_WT.nd2 | 6 | 25 | 22361  | 1  | 26.83  |
| 676 | 1_WT.nd2 | 6 | 26 | 17470  | 1  | 65.3   |
| 677 | 1_WT.nd2 | 6 | 27 | 91525  | 5  | 38.33  |
| 678 | 1_WT.nd2 | 6 | 28 | 68934  | 3  | 25     |
| 679 | 1_WT.nd2 | 6 | 29 | 39258  | 2  | 37     |
| 680 | 1_WT.nd2 | 6 | 30 | 96137  | 5  | 2.24   |
| 681 | 1_WT.nd2 | 6 | 31 | 98183  | 5  | 29.15  |
| 682 | 1_WT.nd2 | 6 | 32 | 21474  | 1  | 25.32  |
| 683 | 1_WT.nd2 | 6 | 33 | 83341  | 4  | 17.09  |
| 684 | 1_WT.nd2 | 6 | 34 | 33812  | 2  | 14.32  |
| 685 | 1_WT.nd2 | 6 | 35 | 24671  | 1  | 37.58  |
| 686 | 1_WT.nd2 | 6 | 36 | 22935  | 1  | 10.3   |
| 687 | 1_WT.nd2 | 6 | 37 | 37844  | 2  | 8.49   |



|     |          |   |    |       |   |        |
|-----|----------|---|----|-------|---|--------|
| 688 | 1_WT.nd2 | 6 | 38 | 27472 | 1 | 5      |
| 689 | 1_WT.nd2 | 6 | 39 | 74195 | 4 | 7.62   |
| 690 | 1_WT.nd2 | 6 | 40 | 47552 | 2 | 10     |
| 691 | 1_WT.nd2 | 6 | 41 | 20177 | 1 | 40.85  |
| 692 | 1_WT.nd2 | 6 | 42 | 69720 | 3 | 12     |
| 693 | 1_WT.nd2 | 6 | 43 | 37268 | 2 | 15.52  |
| 694 | 1_WT.nd2 | 6 | 44 | 59952 | 3 | 30.68  |
| 695 | 1_WT.nd2 | 6 | 45 | 43328 | 2 | 26.83  |
| 696 | 1_WT.nd2 | 6 | 46 | 44072 | 2 | 34.18  |
| 697 | 1_WT.nd2 | 6 | 47 | 58557 | 3 | 39.56  |
| 698 | 1_WT.nd2 | 6 | 48 | 19268 | 1 | 23.32  |
| 699 | 1_WT.nd2 | 6 | 49 | 21084 | 1 | 56.8   |
| 700 | 1_WT.nd2 | 6 | 50 | 19280 | 1 | 38.9   |
| 701 | 1_WT.nd2 | 6 | 51 | 21481 | 1 | 50.21  |
| 702 | 1_WT.nd2 | 6 | 52 | 18830 | 1 | 35.69  |
| 703 | 1_WT.nd2 | 6 | 53 | 24726 | 1 | 1.41   |
| 704 | 1_WT.nd2 | 6 | 54 | 22423 | 1 | 8.06   |
| 705 | 1_WT.nd2 | 6 | 55 | 43399 | 2 | 50.49  |
| 706 | 1_WT.nd2 | 6 | 56 | 22485 | 1 | 5      |
| 707 | 1_WT.nd2 | 6 | 57 | 19617 | 1 | 108.91 |
| 708 | 1_WT.nd2 | 6 | 58 | 18983 | 1 | 107.35 |
| 709 | 1_WT.nd2 | 6 | 59 | 37740 | 2 | 46.17  |
| 710 | 1_WT.nd2 | 6 | 60 | 36153 | 2 | 29.15  |
| 711 | 1_WT.nd2 | 6 | 61 | 24418 | 1 | 26.4   |
| 712 | 1_WT.nd2 | 6 | 62 | 19731 | 1 | 61.4   |
| 713 | 1_WT.nd2 | 6 | 63 | 23948 | 1 | 24.76  |
| 714 | 1_WT.nd2 | 6 | 64 | 38431 | 2 | 22.85  |
| 715 | 1_WT.nd2 | 6 | 65 | 32901 | 2 | 22.56  |
| 716 | 1_WT.nd2 | 6 | 66 | 18705 | 1 | 132.88 |
| 717 | 1_WT.nd2 | 6 | 67 | 45428 | 2 | 27.66  |
| 718 | 1_WT.nd2 | 6 | 68 | 35253 | 2 | 28.02  |
| 719 | 1_WT.nd2 | 6 | 69 | 21653 | 1 | 85.44  |
| 720 | 1_WT.nd2 | 6 | 70 | 24990 | 1 | 32.25  |
| 721 | 1_WT.nd2 | 6 | 71 | 23623 | 1 | 35.17  |
| 722 | 1_WT.nd2 | 6 | 72 | 21553 | 1 | 40.8   |
| 723 | 1_WT.nd2 | 6 | 73 | 64138 | 3 | 52.2   |
| 724 | 1_WT.nd2 | 6 | 74 | 27923 | 1 | 55.95  |
| 725 | 1_WT.nd2 | 6 | 75 | 29872 | 1 | 51.24  |
| 726 | 1_WT.nd2 | 6 | 76 | 23448 | 1 | 70.38  |
| 727 | 1_WT.nd2 | 6 | 77 | 21943 | 1 | 66.48  |
| 728 | 1_WT.nd2 | 6 | 78 | 43074 | 2 | 24.17  |
| 729 | 1_WT.nd2 | 6 | 79 | 19384 | 1 | 84.4   |
| 730 | 1_WT.nd2 | 6 | 80 | 51987 | 3 | 22.47  |

|     |          |   |     |        |    |        |
|-----|----------|---|-----|--------|----|--------|
| 731 | 1_WT.nd2 | 6 | 81  | 25148  | 1  | 19.21  |
| 732 | 1_WT.nd2 | 6 | 82  | 111682 | 6  | 0      |
| 733 | 1_WT.nd2 | 6 | 83  | 25870  | 1  | 39     |
| 734 | 1_WT.nd2 | 6 | 84  | 19959  | 1  | 107.22 |
| 735 | 1_WT.nd2 | 6 | 85  | 19201  | 1  | 37.95  |
| 736 | 1_WT.nd2 | 6 | 86  | 20812  | 1  | 2.24   |
| 737 | 1_WT.nd2 | 6 | 87  | 17781  | 1  | 5.1    |
| 738 | 1_WT.nd2 | 6 | 88  | 26513  | 1  | 12.65  |
| 739 | 1_WT.nd2 | 6 | 89  | 22701  | 1  | 6      |
| 740 | 1_WT.nd2 | 6 | 90  | 28333  | 1  | 6.32   |
| 741 | 1_WT.nd2 | 6 | 91  | 19138  | 1  | 66.12  |
| 742 | 1_WT.nd2 | 6 | 92  | 19344  | 1  | 92.11  |
| 743 | 1_WT.nd2 | 6 | 93  | 20368  | 1  | 78.77  |
| 744 | 1_WT.nd2 | 6 | 94  | 24951  | 1  | 33     |
| 745 | 1_WT.nd2 | 6 | 95  | 22101  | 1  | 46     |
| 746 | 1_WT.nd2 | 6 | 96  | 294434 | 15 | 50.99  |
| 747 | 1_WT.nd2 | 6 | 97  | 190022 | 9  | 46.04  |
| 748 | 1_WT.nd2 | 6 | 98  | 30079  | 1  | 83.57  |
| 749 | 1_WT.nd2 | 6 | 99  | 178846 | 9  | 8.49   |
| 750 | 1_WT.nd2 | 6 | 100 | 18732  | 1  | 54.34  |
| 751 | 1_WT.nd2 | 6 | 101 | 99139  | 5  | 1      |
| 752 | 1_WT.nd2 | 6 | 102 | 89848  | 4  | 16     |
| 753 | 1_WT.nd2 | 6 | 103 | 140487 | 7  | 0      |
| 754 | 1_WT.nd2 | 6 | 104 | 139347 | 7  | 10.2   |
| 755 | 1_WT.nd2 | 6 | 105 | 45761  | 2  | 82.86  |
| 756 | 1_WT.nd2 | 6 | 106 | 21784  | 1  | 92.44  |
| 757 | 1_WT.nd2 | 6 | 107 | 89194  | 4  | 95.52  |
| 758 | 1_WT.nd2 | 6 | 108 | 28804  | 1  | 24.84  |
| 759 | 1_WT.nd2 | 6 | 109 | 19268  | 1  | 33.02  |
| 760 | 1_WT.nd2 | 6 | 110 | 23362  | 1  | 109.59 |
| 761 | 1_WT.nd2 | 6 | 111 | 38911  | 2  | 105.77 |
| 762 | 1_WT.nd2 | 6 | 112 | 29963  | 1  | 47.2   |
| 763 | 1_WT.nd2 | 6 | 113 | 20948  | 1  | 73.06  |
| 764 | 1_WT.nd2 | 6 | 114 | 25124  | 1  | 44.82  |
| 765 | 1_WT.nd2 | 6 | 115 | 19918  | 1  | 58.01  |
| 766 | 1_WT.nd2 | 6 | 116 | 21082  | 1  | 74.11  |
| 767 | 1_WT.nd2 | 6 | 117 | 18415  | 1  | 60.21  |
| 768 | 1_WT.nd2 | 6 | 118 | 21344  | 1  | 79.23  |
| 769 | 1_WT.nd2 | 6 | 119 | 21382  | 1  | 62.63  |
| 770 | 1_WT.nd2 | 6 | 120 | 18128  | 1  | 0      |
| 771 | 1_WT.nd2 | 6 | 121 | 22105  | 1  | 111.83 |
| 772 | 1_WT.nd2 | 6 | 122 | 23074  | 1  | 13.45  |
| 773 | 1_WT.nd2 | 6 | 123 | 23270  | 1  | 71     |

|     |          |   |     |       |   |        |
|-----|----------|---|-----|-------|---|--------|
| 774 | 1_WT.nd2 | 6 | 124 | 29633 | 1 | 129.2  |
| 775 | 1_WT.nd2 | 6 | 125 | 37069 | 2 | 79.03  |
| 776 | 1_WT.nd2 | 6 | 126 | 10331 | 1 | 129.56 |
| 777 | 1_WT.nd2 | 6 | 127 | 21614 | 1 | 67.12  |
| 778 | 1_WT.nd2 | 6 | 128 | 22231 | 1 | 135.42 |
| 779 | 1_WT.nd2 | 6 | 129 | 17687 | 1 | 154.25 |
| 780 | 1_WT.nd2 | 6 | 130 | 47138 | 2 | 110    |
| 781 | 1_WT.nd2 | 7 | 1   | 18364 | 1 | 10.3   |
| 782 | 1_WT.nd2 | 7 | 2   | 20893 | 1 | 122.77 |
| 783 | 1_WT.nd2 | 7 | 3   | 54287 | 3 | 55.17  |
| 784 | 1_WT.nd2 | 7 | 4   | 40664 | 2 | 46.62  |
| 785 | 1_WT.nd2 | 7 | 5   | 54039 | 3 | 42.64  |
| 786 | 1_WT.nd2 | 7 | 6   | 18679 | 1 | 25.46  |
| 787 | 1_WT.nd2 | 7 | 7   | 55220 | 3 | 39.82  |
| 788 | 1_WT.nd2 | 7 | 8   | 28963 | 1 | 39.4   |
| 789 | 1_WT.nd2 | 7 | 9   | 18596 | 1 | 116.28 |
| 790 | 1_WT.nd2 | 7 | 10  | 22120 | 1 | 35.69  |
| 791 | 1_WT.nd2 | 7 | 11  | 18282 | 1 | 12.04  |
| 792 | 1_WT.nd2 | 7 | 12  | 19947 | 1 | 2.24   |
| 793 | 1_WT.nd2 | 7 | 13  | 18487 | 1 | 20     |
| 794 | 1_WT.nd2 | 7 | 14  | 19396 | 1 | 37.34  |
| 795 | 1_WT.nd2 | 7 | 15  | 22083 | 1 | 30.15  |
| 796 | 1_WT.nd2 | 7 | 16  | 17142 | 1 | 3.16   |
| 797 | 1_WT.nd2 | 7 | 17  | 25982 | 1 | 25     |
| 798 | 1_WT.nd2 | 7 | 18  | 20690 | 1 | 11.18  |
| 799 | 1_WT.nd2 | 7 | 19  | 21351 | 1 | 5.83   |
| 800 | 1_WT.nd2 | 7 | 20  | 21218 | 1 | 22.85  |
| 801 | 1_WT.nd2 | 7 | 21  | 20030 | 1 | 27.29  |
| 802 | 1_WT.nd2 | 7 | 22  | 71372 | 4 | 39     |
| 803 | 1_WT.nd2 | 7 | 23  | 44017 | 2 | 26     |
| 804 | 1_WT.nd2 | 7 | 24  | 69579 | 3 | 3      |
| 805 | 1_WT.nd2 | 7 | 25  | 95438 | 5 | 28.28  |
| 806 | 1_WT.nd2 | 7 | 26  | 60567 | 3 | 17.72  |
| 807 | 1_WT.nd2 | 7 | 27  | 23476 | 1 | 14.32  |
| 808 | 1_WT.nd2 | 7 | 28  | 23773 | 1 | 36.67  |
| 809 | 1_WT.nd2 | 7 | 29  | 32817 | 2 | 8.49   |
| 810 | 1_WT.nd2 | 7 | 30  | 24855 | 1 | 4.24   |
| 811 | 1_WT.nd2 | 7 | 31  | 95308 | 5 | 7.62   |
| 812 | 1_WT.nd2 | 7 | 32  | 39300 | 2 | 11     |
| 813 | 1_WT.nd2 | 7 | 33  | 26699 | 1 | 12.04  |
| 814 | 1_WT.nd2 | 7 | 34  | 25968 | 1 | 15.81  |
| 815 | 1_WT.nd2 | 7 | 35  | 73266 | 4 | 26.4   |
| 816 | 1_WT.nd2 | 7 | 36  | 35336 | 2 | 34.79  |

|     |          |   |    |        |   |        |
|-----|----------|---|----|--------|---|--------|
| 817 | 1_WT.nd2 | 7 | 37 | 42062  | 2 | 39.29  |
| 818 | 1_WT.nd2 | 7 | 38 | 19365  | 1 | 56.36  |
| 819 | 1_WT.nd2 | 7 | 39 | 18671  | 1 | 38.6   |
| 820 | 1_WT.nd2 | 7 | 40 | 19877  | 1 | 50.21  |
| 821 | 1_WT.nd2 | 7 | 41 | 22645  | 1 | 2.24   |
| 822 | 1_WT.nd2 | 7 | 42 | 20466  | 1 | 7.21   |
| 823 | 1_WT.nd2 | 7 | 43 | 28181  | 1 | 50.49  |
| 824 | 1_WT.nd2 | 7 | 44 | 21504  | 1 | 5      |
| 825 | 1_WT.nd2 | 7 | 45 | 17848  | 1 | 107.78 |
| 826 | 1_WT.nd2 | 7 | 46 | 22775  | 1 | 43.68  |
| 827 | 1_WT.nd2 | 7 | 47 | 24755  | 1 | 26.42  |
| 828 | 1_WT.nd2 | 7 | 48 | 26354  | 1 | 23.6   |
| 829 | 1_WT.nd2 | 7 | 49 | 19258  | 1 | 58.69  |
| 830 | 1_WT.nd2 | 7 | 50 | 23165  | 1 | 21.21  |
| 831 | 1_WT.nd2 | 7 | 51 | 24379  | 1 | 20.12  |
| 832 | 1_WT.nd2 | 7 | 52 | 22080  | 1 | 19.42  |
| 833 | 1_WT.nd2 | 7 | 53 | 17680  | 1 | 133.3  |
| 834 | 1_WT.nd2 | 7 | 54 | 20213  | 1 | 24     |
| 835 | 1_WT.nd2 | 7 | 55 | 24647  | 1 | 26.93  |
| 836 | 1_WT.nd2 | 7 | 56 | 22138  | 1 | 27.07  |
| 837 | 1_WT.nd2 | 7 | 57 | 22119  | 1 | 34.93  |
| 838 | 1_WT.nd2 | 7 | 58 | 44998  | 2 | 52.2   |
| 839 | 1_WT.nd2 | 7 | 59 | 25968  | 1 | 56.46  |
| 840 | 1_WT.nd2 | 7 | 60 | 20942  | 1 | 51.24  |
| 841 | 1_WT.nd2 | 7 | 61 | 22025  | 1 | 70.38  |
| 842 | 1_WT.nd2 | 7 | 62 | 17487  | 1 | 83.43  |
| 843 | 1_WT.nd2 | 7 | 63 | 27498  | 1 | 25.06  |
| 844 | 1_WT.nd2 | 7 | 64 | 33949  | 2 | 22.83  |
| 845 | 1_WT.nd2 | 7 | 65 | 19258  | 1 | 20.25  |
| 846 | 1_WT.nd2 | 7 | 66 | 31709  | 2 | 16.97  |
| 847 | 1_WT.nd2 | 7 | 67 | 22332  | 1 | 39     |
| 848 | 1_WT.nd2 | 7 | 68 | 18726  | 1 | 107.22 |
| 849 | 1_WT.nd2 | 7 | 69 | 19672  | 1 | 2.24   |
| 850 | 1_WT.nd2 | 7 | 70 | 21631  | 1 | 12.37  |
| 851 | 1_WT.nd2 | 7 | 71 | 20737  | 1 | 6      |
| 852 | 1_WT.nd2 | 7 | 72 | 24916  | 1 | 6.32   |
| 853 | 1_WT.nd2 | 7 | 73 | 18487  | 1 | 23.32  |
| 854 | 1_WT.nd2 | 7 | 74 | 23929  | 1 | 33     |
| 855 | 1_WT.nd2 | 7 | 75 | 101792 | 5 | 43.32  |
| 856 | 1_WT.nd2 | 7 | 76 | 22979  | 1 | 45.1   |
| 857 | 1_WT.nd2 | 7 | 77 | 46425  | 2 | 52.8   |
| 858 | 1_WT.nd2 | 7 | 78 | 20499  | 1 | 2.83   |
| 859 | 1_WT.nd2 | 7 | 79 | 11427  | 1 | 12.65  |

|     |          |   |    |        |   |        |
|-----|----------|---|----|--------|---|--------|
| 860 | 1_WT.nd2 | 7 | 80 | 20983  | 1 | 91.21  |
| 861 | 1_WT.nd2 | 7 | 81 | 24282  | 1 | 24.08  |
| 862 | 1_WT.nd2 | 7 | 82 | 42555  | 2 | 96.51  |
| 863 | 1_WT.nd2 | 7 | 83 | 27832  | 1 | 45.8   |
| 864 | 1_WT.nd2 | 7 | 84 | 24424  | 1 | 105.51 |
| 865 | 1_WT.nd2 | 7 | 85 | 21123  | 1 | 44.82  |
| 866 | 1_WT.nd2 | 7 | 86 | 21512  | 1 | 111.02 |
| 867 | 1_WT.nd2 | 7 | 87 | 19796  | 1 | 12.73  |
| 868 | 1_WT.nd2 | 7 | 88 | 21856  | 1 | 70     |
| 869 | 1_WT.nd2 | 7 | 89 | 26684  | 1 | 128.6  |
| 870 | 1_WT.nd2 | 7 | 90 | 7629   | 0 | 129.56 |
| 871 | 1_WT.nd2 | 8 | 1  | 21505  | 1 | 26.42  |
| 872 | 1_WT.nd2 | 8 | 2  | 17746  | 1 | 113.85 |
| 873 | 1_WT.nd2 | 8 | 3  | 16833  | 1 | 29.53  |
| 874 | 1_WT.nd2 | 8 | 4  | 20583  | 1 | 29.7   |
| 875 | 1_WT.nd2 | 8 | 5  | 23395  | 1 | 24.04  |
| 876 | 1_WT.nd2 | 8 | 6  | 25798  | 1 | 97.67  |
| 877 | 1_WT.nd2 | 8 | 7  | 22426  | 1 | 10     |
| 878 | 1_WT.nd2 | 8 | 8  | 21784  | 1 | 86.7   |
| 879 | 1_WT.nd2 | 8 | 9  | 20948  | 1 | 17     |
| 880 | 1_WT.nd2 | 8 | 10 | 21947  | 1 | 26.08  |
| 881 | 1_WT.nd2 | 8 | 11 | 19903  | 1 | 40.71  |
| 882 | 1_WT.nd2 | 8 | 12 | 21212  | 1 | 7      |
| 883 | 1_WT.nd2 | 8 | 13 | 22660  | 1 | 3      |
| 884 | 1_WT.nd2 | 8 | 14 | 22743  | 1 | 27.73  |
| 885 | 1_WT.nd2 | 8 | 15 | 59724  | 3 | 0      |
| 886 | 1_WT.nd2 | 8 | 16 | 93573  | 5 | 0      |
| 887 | 1_WT.nd2 | 8 | 17 | 57051  | 3 | 0      |
| 888 | 1_WT.nd2 | 8 | 18 | 53059  | 3 | 6      |
| 889 | 1_WT.nd2 | 8 | 19 | 52299  | 3 | 8.25   |
| 890 | 1_WT.nd2 | 8 | 20 | 109825 | 5 | 13     |
| 891 | 1_WT.nd2 | 8 | 21 | 140832 | 7 | 19.7   |
| 892 | 1_WT.nd2 | 8 | 22 | 24071  | 1 | 14.04  |
| 893 | 1_WT.nd2 | 8 | 23 | 60471  | 3 | 46.32  |
| 894 | 1_WT.nd2 | 8 | 24 | 107464 | 5 | 27     |
| 895 | 1_WT.nd2 | 8 | 25 | 44075  | 2 | 43.01  |
| 896 | 1_WT.nd2 | 8 | 26 | 85827  | 4 | 35.38  |
| 897 | 1_WT.nd2 | 8 | 27 | 22209  | 1 | 41.11  |
| 898 | 1_WT.nd2 | 8 | 28 | 20352  | 1 | 73.25  |
| 899 | 1_WT.nd2 | 8 | 29 | 20952  | 1 | 37.34  |
| 900 | 1_WT.nd2 | 8 | 30 | 21307  | 1 | 68.01  |
| 901 | 1_WT.nd2 | 8 | 31 | 33910  | 2 | 72.18  |
| 902 | 1_WT.nd2 | 8 | 32 | 21758  | 1 | 89.31  |

|     |          |   |    |        |   |        |
|-----|----------|---|----|--------|---|--------|
| 903 | 1_WT.nd2 | 8 | 33 | 21384  | 1 | 10.3   |
| 904 | 1_WT.nd2 | 8 | 34 | 18732  | 1 | 18     |
| 905 | 1_WT.nd2 | 8 | 35 | 127199 | 6 | 57.14  |
| 906 | 1_WT.nd2 | 8 | 36 | 38697  | 2 | 53.24  |
| 907 | 1_WT.nd2 | 8 | 37 | 21440  | 1 | 48.05  |
| 908 | 1_WT.nd2 | 8 | 38 | 19176  | 1 | 62.36  |
| 909 | 1_WT.nd2 | 8 | 39 | 21936  | 1 | 32.06  |
| 910 | 1_WT.nd2 | 8 | 40 | 27310  | 1 | 19     |
| 911 | 1_WT.nd2 | 8 | 41 | 22029  | 1 | 56.01  |
| 912 | 1_WT.nd2 | 8 | 42 | 21235  | 1 | 85.29  |
| 913 | 1_WT.nd2 | 8 | 43 | 22086  | 1 | 69.78  |
| 914 | 1_WT.nd2 | 8 | 44 | 17929  | 1 | 89.38  |
| 915 | 1_WT.nd2 | 8 | 45 | 20675  | 1 | 94.87  |
| 916 | 1_WT.nd2 | 8 | 46 | 24407  | 1 | 87.78  |
| 917 | 1_WT.nd2 | 8 | 47 | 18592  | 1 | 39.05  |
| 918 | 1_WT.nd2 | 8 | 48 | 21140  | 1 | 23.77  |
| 919 | 1_WT.nd2 | 8 | 49 | 26391  | 1 | 83.63  |
| 920 | 1_WT.nd2 | 8 | 50 | 19983  | 1 | 44.69  |
| 921 | 1_WT.nd2 | 8 | 51 | 21908  | 1 | 32     |
| 922 | 1_WT.nd2 | 8 | 52 | 24881  | 1 | 138.72 |
| 923 | 1_WT.nd2 | 8 | 53 | 19271  | 1 | 133.96 |
| 924 | 1_WT.nd2 | 8 | 54 | 22040  | 1 | 151.49 |
| 925 | 1_WT.nd2 | 8 | 55 | 18008  | 1 | 201.02 |
| 926 | 1_WT.nd2 | 8 | 56 | 19402  | 1 | 210.1  |
| 927 | 1_WT.nd2 | 8 | 57 | 27257  | 1 | 67.07  |
| 928 | 1_WT.nd2 | 8 | 58 | 19001  | 1 | 82.02  |
| 929 | 1_WT.nd2 | 9 | 1  | 20636  | 1 | 128.14 |
| 930 | 1_WT.nd2 | 9 | 2  | 43780  | 2 | 34     |
| 931 | 1_WT.nd2 | 9 | 3  | 23492  | 1 | 113.11 |
| 932 | 1_WT.nd2 | 9 | 4  | 25249  | 1 | 22.14  |
| 933 | 1_WT.nd2 | 9 | 5  | 19494  | 1 | 108.04 |
| 934 | 1_WT.nd2 | 9 | 6  | 18892  | 1 | 100.12 |
| 935 | 1_WT.nd2 | 9 | 7  | 23994  | 1 | 79.4   |
| 936 | 1_WT.nd2 | 9 | 8  | 21229  | 1 | 19.85  |
| 937 | 1_WT.nd2 | 9 | 9  | 31794  | 2 | 6      |
| 938 | 1_WT.nd2 | 9 | 10 | 24078  | 1 | 0      |
| 939 | 1_WT.nd2 | 9 | 11 | 33905  | 2 | 1      |
| 940 | 1_WT.nd2 | 9 | 12 | 29433  | 1 | 2      |
| 941 | 1_WT.nd2 | 9 | 13 | 17752  | 1 | 47.38  |
| 942 | 1_WT.nd2 | 9 | 14 | 19564  | 1 | 14.32  |
| 943 | 1_WT.nd2 | 9 | 15 | 17855  | 1 | 38.9   |
| 944 | 1_WT.nd2 | 9 | 16 | 17925  | 1 | 50.48  |
| 945 | 1_WT.nd2 | 9 | 17 | 17198  | 1 | 31.95  |

|     |          |   |    |        |   |        |
|-----|----------|---|----|--------|---|--------|
| 946 | 1_WT.nd2 | 9 | 18 | 28422  | 1 | 39.32  |
| 947 | 1_WT.nd2 | 9 | 19 | 23924  | 1 | 41.59  |
| 948 | 1_WT.nd2 | 9 | 20 | 19487  | 1 | 0      |
| 949 | 1_WT.nd2 | 9 | 21 | 20073  | 1 | 68.95  |
| 950 | 1_WT.nd2 | 9 | 22 | 39398  | 2 | 23.41  |
| 951 | 1_WT.nd2 | 9 | 23 | 36464  | 2 | 31.38  |
| 952 | 1_WT.nd2 | 9 | 24 | 32923  | 2 | 7.28   |
| 953 | 1_WT.nd2 | 9 | 25 | 45015  | 2 | 0      |
| 954 | 1_WT.nd2 | 9 | 26 | 90077  | 4 | 0      |
| 955 | 1_WT.nd2 | 9 | 27 | 60122  | 3 | 0      |
| 956 | 1_WT.nd2 | 9 | 28 | 38878  | 2 | 0      |
| 957 | 1_WT.nd2 | 9 | 29 | 39911  | 2 | 0      |
| 958 | 1_WT.nd2 | 9 | 30 | 127293 | 6 | 0      |
| 959 | 1_WT.nd2 | 9 | 31 | 21864  | 1 | 4.24   |
| 960 | 1_WT.nd2 | 9 | 32 | 29550  | 1 | 49.4   |
| 961 | 1_WT.nd2 | 9 | 33 | 45868  | 2 | 10     |
| 962 | 1_WT.nd2 | 9 | 34 | 24433  | 1 | 2.83   |
| 963 | 1_WT.nd2 | 9 | 35 | 131734 | 7 | 11.7   |
| 964 | 1_WT.nd2 | 9 | 36 | 76823  | 4 | 19.72  |
| 965 | 1_WT.nd2 | 9 | 37 | 24189  | 1 | 60.01  |
| 966 | 1_WT.nd2 | 9 | 38 | 35486  | 2 | 20.81  |
| 967 | 1_WT.nd2 | 9 | 39 | 62020  | 3 | 31.76  |
| 968 | 1_WT.nd2 | 9 | 40 | 21764  | 1 | 75.74  |
| 969 | 1_WT.nd2 | 9 | 41 | 72742  | 4 | 27.8   |
| 970 | 1_WT.nd2 | 9 | 42 | 22624  | 1 | 78.59  |
| 971 | 1_WT.nd2 | 9 | 43 | 29629  | 1 | 93.01  |
| 972 | 1_WT.nd2 | 9 | 44 | 23368  | 1 | 102.46 |
| 973 | 1_WT.nd2 | 9 | 45 | 21145  | 1 | 37.34  |
| 974 | 1_WT.nd2 | 9 | 46 | 22118  | 1 | 77.39  |
| 975 | 1_WT.nd2 | 9 | 47 | 17522  | 1 | 125.48 |
| 976 | 1_WT.nd2 | 9 | 48 | 67514  | 3 | 123.47 |
| 977 | 1_WT.nd2 | 9 | 49 | 21678  | 1 | 32.65  |
| 978 | 1_WT.nd2 | 9 | 50 | 60180  | 3 | 123.49 |
| 979 | 1_WT.nd2 | 9 | 51 | 23078  | 1 | 131.32 |
| 980 | 1_WT.nd2 | 9 | 52 | 77802  | 4 | 124.15 |
| 981 | 1_WT.nd2 | 9 | 53 | 71274  | 4 | 126.06 |
| 982 | 1_WT.nd2 | 9 | 54 | 33416  | 2 | 127.06 |
| 983 | 1_WT.nd2 | 9 | 55 | 52540  | 3 | 129    |
| 984 | 1_WT.nd2 | 9 | 56 | 98613  | 5 | 140.8  |
| 985 | 1_WT.nd2 | 9 | 57 | 20645  | 1 | 7.07   |
| 986 | 1_WT.nd2 | 9 | 58 | 18235  | 1 | 64.03  |
| 987 | 1_WT.nd2 | 9 | 59 | 20127  | 1 | 22     |
| 988 | 1_WT.nd2 | 9 | 60 | 20663  | 1 | 157.19 |

|      |          |    |     |        |    |        |
|------|----------|----|-----|--------|----|--------|
| 989  | 1_WT.nd2 | 9  | 61  | 30700  | 2  | 144.59 |
| 990  | 1_WT.nd2 | 9  | 62  | 19729  | 1  | 11.18  |
| 991  | 1_WT.nd2 | 9  | 63  | 38226  | 2  | 11.66  |
| 992  | 1_WT.nd2 | 9  | 64  | 74837  | 4  | 7.07   |
| 993  | 1_WT.nd2 | 9  | 65  | 35033  | 2  | 0      |
| 994  | 1_WT.nd2 | 9  | 66  | 46402  | 2  | 0      |
| 995  | 1_WT.nd2 | 9  | 67  | 419854 | 21 | 62.94  |
| 996  | 1_WT.nd2 | 9  | 68  | 22820  | 1  | 48.01  |
| 997  | 1_WT.nd2 | 9  | 69  | 19959  | 1  | 67.12  |
| 998  | 1_WT.nd2 | 9  | 70  | 26215  | 1  | 10.2   |
| 999  | 1_WT.nd2 | 9  | 71  | 25114  | 1  | 1      |
| 1000 | 1_WT.nd2 | 9  | 72  | 85268  | 4  | 13.6   |
| 1001 | 1_WT.nd2 | 9  | 73  | 27623  | 1  | 27.29  |
| 1002 | 1_WT.nd2 | 9  | 74  | 26439  | 1  | 33.6   |
| 1003 | 1_WT.nd2 | 9  | 75  | 108984 | 5  | 38.95  |
| 1004 | 1_WT.nd2 | 9  | 76  | 19474  | 1  | 39.05  |
| 1005 | 1_WT.nd2 | 9  | 77  | 39348  | 2  | 46.84  |
| 1006 | 1_WT.nd2 | 9  | 78  | 23060  | 1  | 70.72  |
| 1007 | 1_WT.nd2 | 9  | 79  | 23056  | 1  | 67.8   |
| 1008 | 1_WT.nd2 | 9  | 80  | 21147  | 1  | 79.03  |
| 1009 | 1_WT.nd2 | 9  | 81  | 22185  | 1  | 66.01  |
| 1010 | 1_WT.nd2 | 9  | 82  | 84557  | 4  | 43.91  |
| 1011 | 1_WT.nd2 | 9  | 83  | 20027  | 1  | 25.06  |
| 1012 | 1_WT.nd2 | 9  | 84  | 24974  | 1  | 162.61 |
| 1013 | 1_WT.nd2 | 9  | 85  | 28161  | 1  | 36.77  |
| 1014 | 1_WT.nd2 | 9  | 86  | 20646  | 1  | 96.34  |
| 1015 | 1_WT.nd2 | 9  | 87  | 113434 | 6  | 47.01  |
| 1016 | 1_WT.nd2 | 9  | 88  | 22754  | 1  | 72.37  |
| 1017 | 1_WT.nd2 | 9  | 89  | 23662  | 1  | 115.12 |
| 1018 | 1_WT.nd2 | 9  | 90  | 19959  | 1  | 112.87 |
| 1019 | 1_WT.nd2 | 9  | 91  | 21306  | 1  | 115.12 |
| 1020 | 1_WT.nd2 | 9  | 92  | 20861  | 1  | 196.29 |
| 1021 | 1_WT.nd2 | 9  | 93  | 17681  | 1  | 205.39 |
| 1022 | 1_WT.nd2 | 9  | 94  | 24741  | 1  | 117.69 |
| 1023 | 1_WT.nd2 | 9  | 95  | 27137  | 1  | 89.94  |
| 1024 | 1_WT.nd2 | 9  | 96  | 22546  | 1  | 97.64  |
| 1025 | 1_WT.nd2 | 9  | 97  | 20633  | 1  | 27.78  |
| 1026 | 1_WT.nd2 | 9  | 98  | 80251  | 4  | 97.84  |
| 1027 | 1_WT.nd2 | 9  | 99  | 23693  | 1  | 220.42 |
| 1028 | 1_WT.nd2 | 9  | 100 | 43051  | 2  | 106.15 |
| 1029 | 1_WT.nd2 | 9  | 101 | 21464  | 1  | 110.68 |
| 1030 | 1_WT.nd2 | 10 | 1   | 18955  | 1  | 28.23  |
| 1031 | 1_WT.nd2 | 10 | 2   | 18561  | 1  | 60.3   |



|      |          |    |    |        |    |        |
|------|----------|----|----|--------|----|--------|
| 1032 | 1_WT.nd2 | 10 | 3  | 24269  | 1  | 34     |
| 1033 | 1_WT.nd2 | 10 | 4  | 293600 | 15 | 23.41  |
| 1034 | 1_WT.nd2 | 10 | 5  | 21805  | 1  | 23.6   |
| 1035 | 1_WT.nd2 | 10 | 6  | 21925  | 1  | 39     |
| 1036 | 1_WT.nd2 | 10 | 7  | 20779  | 1  | 91.92  |
| 1037 | 1_WT.nd2 | 10 | 8  | 19167  | 1  | 8.06   |
| 1038 | 1_WT.nd2 | 10 | 9  | 16242  | 1  | 36.77  |
| 1039 | 1_WT.nd2 | 10 | 10 | 14625  | 1  | 32.31  |
| 1040 | 1_WT.nd2 | 10 | 11 | 18159  | 1  | 160.8  |
| 1041 | 1_WT.nd2 | 10 | 12 | 25856  | 1  | 109.48 |
| 1042 | 1_WT.nd2 | 10 | 13 | 20305  | 1  | 94.51  |
| 1043 | 1_WT.nd2 | 10 | 14 | 170354 | 8  | 129.47 |
| 1044 | 1_WT.nd2 | 10 | 15 | 22307  | 1  | 138.41 |
| 1045 | 1_WT.nd2 | 10 | 16 | 72283  | 4  | 140.68 |
| 1046 | 1_WT.nd2 | 10 | 17 | 69957  | 3  | 145.33 |
| 1047 | 1_WT.nd2 | 10 | 18 | 17636  | 1  | 83.63  |
| 1048 | 1_WT.nd2 | 10 | 19 | 38871  | 2  | 164.75 |
| 1049 | 1_WT.nd2 | 10 | 20 | 108278 | 5  | 170.84 |
| 1050 | 1_WT.nd2 | 10 | 21 | 22787  | 1  | 169.58 |
| 1051 | 1_WT.nd2 | 10 | 22 | 20365  | 1  | 92.44  |
| 1052 | 1_WT.nd2 | 10 | 23 | 20123  | 1  | 179.95 |
| 1053 | 1_WT.nd2 | 10 | 24 | 45708  | 2  | 175.39 |
| 1054 | 1_WT.nd2 | 10 | 25 | 51508  | 3  | 178.27 |
| 1055 | 1_WT.nd2 | 10 | 26 | 47990  | 2  | 183.21 |
| 1056 | 1_WT.nd2 | 10 | 27 | 57057  | 3  | 181.99 |
| 1057 | 1_WT.nd2 | 10 | 28 | 765431 | 38 | 182.46 |
| 1058 | 1_WT.nd2 | 10 | 29 | 21468  | 1  | 181.5  |
| 1059 | 1_WT.nd2 | 10 | 30 | 17246  | 1  | 7      |
| 1060 | 1_WT.nd2 | 10 | 31 | 15716  | 1  | 168.47 |
| 1061 | 1_WT.nd2 | 10 | 32 | 20974  | 1  | 107    |
| 1062 | 1_WT.nd2 | 10 | 33 | 84462  | 4  | 167.03 |
| 1063 | 1_WT.nd2 | 10 | 34 | 17890  | 1  | 149.09 |
| 1064 | 1_WT.nd2 | 10 | 35 | 60264  | 3  | 155.17 |
| 1065 | 1_WT.nd2 | 10 | 36 | 34412  | 2  | 153.44 |
| 1066 | 1_WT.nd2 | 10 | 37 | 25901  | 1  | 141.23 |
| 1067 | 1_WT.nd2 | 10 | 38 | 73249  | 4  | 146.89 |
| 1068 | 1_WT.nd2 | 10 | 39 | 19768  | 1  | 39.96  |
| 1069 | 1_WT.nd2 | 10 | 40 | 22640  | 1  | 39.22  |
| 1070 | 1_WT.nd2 | 10 | 41 | 72605  | 4  | 135.07 |
| 1071 | 1_WT.nd2 | 10 | 42 | 24098  | 1  | 46     |
| 1072 | 1_WT.nd2 | 10 | 43 | 427569 | 21 | 92.63  |
| 1073 | 1_WT.nd2 | 10 | 44 | 20467  | 1  | 117.2  |
| 1074 | 1_WT.nd2 | 10 | 45 | 21245  | 1  | 127.64 |

|      |          |    |    |        |    |        |
|------|----------|----|----|--------|----|--------|
| 1075 | 1_WT.nd2 | 10 | 46 | 20223  | 1  | 47.2   |
| 1076 | 1_WT.nd2 | 10 | 47 | 20092  | 1  | 102.73 |
| 1077 | 1_WT.nd2 | 10 | 48 | 21570  | 1  | 109.57 |
| 1078 | 1_WT.nd2 | 10 | 49 | 20623  | 1  | 22     |
| 1079 | 1_WT.nd2 | 10 | 50 | 20517  | 1  | 218.18 |
| 1080 | 1_WT.nd2 | 10 | 51 | 65669  | 3  | 56.46  |
| 1081 | 1_WT.nd2 | 10 | 52 | 51051  | 3  | 63.07  |
| 1082 | 1_WT.nd2 | 10 | 53 | 24037  | 1  | 180.35 |
| 1083 | 1_WT.nd2 | 10 | 54 | 20099  | 1  | 36.07  |
| 1084 | 1_WT.nd2 | 10 | 55 | 115323 | 6  | 72.01  |
| 1085 | 1_WT.nd2 | 10 | 56 | 93669  | 5  | 73.35  |
| 1086 | 1_WT.nd2 | 10 | 57 | 20388  | 1  | 36.62  |
| 1087 | 1_WT.nd2 | 10 | 58 | 149219 | 7  | 68.51  |
| 1088 | 1_WT.nd2 | 10 | 59 | 60190  | 3  | 69.66  |
| 1089 | 1_WT.nd2 | 10 | 60 | 18635  | 1  | 45.54  |
| 1090 | 1_WT.nd2 | 10 | 61 | 68355  | 3  | 67.88  |
| 1091 | 1_WT.nd2 | 10 | 62 | 21703  | 1  | 109.27 |
| 1092 | 1_WT.nd2 | 10 | 63 | 112621 | 6  | 65.76  |
| 1093 | 1_WT.nd2 | 10 | 64 | 146740 | 7  | 63.25  |
| 1094 | 1_WT.nd2 | 10 | 65 | 737127 | 37 | 71.59  |
| 1095 | 1_WT.nd2 | 10 | 66 | 28039  | 1  | 0      |
| 1096 | 1_WT.nd2 | 10 | 67 | 24723  | 1  | 175.87 |
| 1097 | 1_WT.nd2 | 10 | 68 | 22849  | 1  | 206.63 |
| 1098 | 1_WT.nd2 | 10 | 69 | 169967 | 8  | 61.77  |
| 1099 | 1_WT.nd2 | 10 | 70 | 56202  | 3  | 20.52  |
| 1100 | 1_WT.nd2 | 10 | 71 | 92478  | 5  | 57.7   |
| 1101 | 1_WT.nd2 | 10 | 72 | 126901 | 6  | 52.81  |
| 1102 | 1_WT.nd2 | 10 | 73 | 22664  | 1  | 161.7  |
| 1103 | 1_WT.nd2 | 10 | 74 | 21061  | 1  | 75     |
| 1104 | 1_WT.nd2 | 10 | 75 | 44389  | 2  | 135.34 |
| 1105 | 1_WT.nd2 | 10 | 76 | 22871  | 1  | 74.46  |
| 1106 | 1_WT.nd2 | 10 | 77 | 90293  | 4  | 50.22  |
| 1107 | 1_WT.nd2 | 10 | 78 | 23695  | 1  | 176.78 |
| 1108 | 1_WT.nd2 | 10 | 79 | 36518  | 2  | 150.42 |
| 1109 | 1_WT.nd2 | 10 | 80 | 41083  | 2  | 44.72  |
| 1110 | 1_WT.nd2 | 10 | 81 | 21796  | 1  | 136.49 |
| 1111 | 1_WT.nd2 | 10 | 82 | 20024  | 1  | 7.07   |
| 1112 | 1_WT.nd2 | 10 | 83 | 19693  | 1  | 32.06  |
| 1113 | 1_WT.nd2 | 10 | 84 | 80358  | 4  | 38.08  |
| 1114 | 1_WT.nd2 | 10 | 85 | 105195 | 5  | 34.44  |
| 1115 | 1_WT.nd2 | 10 | 86 | 43674  | 2  | 42.44  |
| 1116 | 1_WT.nd2 | 10 | 87 | 26057  | 1  | 187.1  |
| 1117 | 1_WT.nd2 | 10 | 88 | 50632  | 3  | 41.11  |

|      |          |    |     |        |   |        |
|------|----------|----|-----|--------|---|--------|
| 1118 | 1_WT.nd2 | 10 | 89  | 22606  | 1 | 42.43  |
| 1119 | 1_WT.nd2 | 10 | 90  | 20844  | 1 | 70.84  |
| 1120 | 1_WT.nd2 | 10 | 91  | 30087  | 1 | 101.6  |
| 1121 | 1_WT.nd2 | 10 | 92  | 113993 | 6 | 176.15 |
| 1122 | 1_WT.nd2 | 10 | 93  | 92723  | 5 | 25.32  |
| 1123 | 1_WT.nd2 | 10 | 94  | 26507  | 1 | 38.21  |
| 1124 | 1_WT.nd2 | 10 | 95  | 20153  | 1 | 145.52 |
| 1125 | 1_WT.nd2 | 10 | 96  | 23453  | 1 | 66.22  |
| 1126 | 1_WT.nd2 | 10 | 97  | 69457  | 3 | 196.79 |
| 1127 | 1_WT.nd2 | 10 | 98  | 62394  | 3 | 183    |
| 1128 | 1_WT.nd2 | 10 | 99  | 24393  | 1 | 34.13  |
| 1129 | 1_WT.nd2 | 10 | 100 | 21046  | 1 | 170.06 |
| 1130 | 1_WT.nd2 | 10 | 101 | 21538  | 1 | 198.91 |
| 1131 | 1_WT.nd2 | 10 | 102 | 32942  | 2 | 203.08 |
| 1132 | 1_WT.nd2 | 10 | 103 | 19300  | 1 | 95.82  |
| 1133 | 1_WT.nd2 | 10 | 104 | 38490  | 2 | 134.16 |
| 1134 | 1_WT.nd2 | 10 | 105 | 21512  | 1 | 31.91  |
| 1135 | 1_WT.nd2 | 10 | 106 | 22978  | 1 | 64.08  |
| 1136 | 1_WT.nd2 | 10 | 107 | 25011  | 1 | 28.02  |
| 1137 | 1_WT.nd2 | 10 | 108 | 39514  | 2 | 18.6   |
| 1138 | 1_WT.nd2 | 10 | 109 | 19262  | 1 | 13.6   |
| 1139 | 1_WT.nd2 | 10 | 110 | 17902  | 1 | 73.78  |
| 1140 | 1_WT.nd2 | 10 | 111 | 20779  | 1 | 35.23  |
| 1141 | 1_WT.nd2 | 10 | 112 | 22051  | 1 | 39.81  |
| 1142 | 1_WT.nd2 | 10 | 113 | 23003  | 1 | 18.44  |
| 1143 | 1_WT.nd2 | 10 | 114 | 19206  | 1 | 32.65  |
| 1144 | 1_WT.nd2 | 10 | 115 | 19479  | 1 | 12.17  |
| 1145 | 1_WT.nd2 | 10 | 116 | 23346  | 1 | 33.24  |
| 1    | 2_WT.nd2 | 1  | 1   | 18870  | 1 | 127.02 |
| 2    | 2_WT.nd2 | 1  | 2   | 15634  | 1 | 130.86 |
| 3    | 2_WT.nd2 | 1  | 3   | 23872  | 1 | 50.33  |
| 4    | 2_WT.nd2 | 1  | 4   | 22416  | 1 | 62.63  |
| 5    | 2_WT.nd2 | 1  | 5   | 17233  | 1 | 69.29  |
| 6    | 2_WT.nd2 | 1  | 6   | 20578  | 1 | 87.73  |
| 7    | 2_WT.nd2 | 1  | 7   | 17556  | 1 | 48.8   |
| 8    | 2_WT.nd2 | 1  | 8   | 28857  | 1 | 37.44  |
| 9    | 2_WT.nd2 | 1  | 9   | 11653  | 1 | 27.02  |
| 10   | 2_WT.nd2 | 1  | 10  | 44092  | 2 | 44.41  |
| 11   | 2_WT.nd2 | 1  | 11  | 27380  | 1 | 38.64  |
| 12   | 2_WT.nd2 | 1  | 12  | 46418  | 2 | 32.98  |
| 13   | 2_WT.nd2 | 1  | 13  | 20296  | 1 | 53.08  |
| 14   | 2_WT.nd2 | 1  | 14  | 22803  | 1 | 22.67  |
| 15   | 2_WT.nd2 | 1  | 15  | 24032  | 1 | 28.3   |

|    |          |   |    |        |    |       |
|----|----------|---|----|--------|----|-------|
| 16 | 2_WT.nd2 | 1 | 16 | 38318  | 2  | 10.82 |
| 17 | 2_WT.nd2 | 1 | 17 | 58641  | 3  | 24.08 |
| 18 | 2_WT.nd2 | 1 | 18 | 12092  | 1  | 2.24  |
| 19 | 2_WT.nd2 | 1 | 19 | 42563  | 2  | 13.32 |
| 20 | 2_WT.nd2 | 1 | 20 | 82550  | 4  | 29.68 |
| 21 | 2_WT.nd2 | 1 | 21 | 25216  | 1  | 28.18 |
| 22 | 2_WT.nd2 | 1 | 22 | 25911  | 1  | 27.2  |
| 23 | 2_WT.nd2 | 1 | 23 | 8805   | 0  | 30.46 |
| 24 | 2_WT.nd2 | 1 | 24 | 81440  | 4  | 33.11 |
| 25 | 2_WT.nd2 | 1 | 25 | 51927  | 3  | 30.81 |
| 26 | 2_WT.nd2 | 1 | 26 | 36169  | 2  | 30.15 |
| 27 | 2_WT.nd2 | 1 | 27 | 34046  | 2  | 33    |
| 28 | 2_WT.nd2 | 1 | 28 | 33441  | 2  | 35.13 |
| 29 | 2_WT.nd2 | 1 | 29 | 39692  | 2  | 36    |
| 30 | 2_WT.nd2 | 1 | 30 | 53729  | 3  | 15.81 |
| 31 | 2_WT.nd2 | 1 | 31 | 19687  | 1  | 42.11 |
| 32 | 2_WT.nd2 | 1 | 32 | 22370  | 1  | 7.62  |
| 33 | 2_WT.nd2 | 1 | 33 | 36275  | 2  | 43.28 |
| 34 | 2_WT.nd2 | 1 | 34 | 15550  | 1  | 3     |
| 35 | 2_WT.nd2 | 1 | 35 | 29867  | 1  | 40    |
| 36 | 2_WT.nd2 | 1 | 36 | 43809  | 2  | 4.24  |
| 37 | 2_WT.nd2 | 1 | 37 | 63560  | 3  | 9.9   |
| 38 | 2_WT.nd2 | 1 | 38 | 35024  | 2  | 24.41 |
| 39 | 2_WT.nd2 | 1 | 39 | 19613  | 1  | 37.44 |
| 40 | 2_WT.nd2 | 1 | 40 | 19315  | 1  | 34.71 |
| 41 | 2_WT.nd2 | 1 | 41 | 21135  | 1  | 44.72 |
| 42 | 2_WT.nd2 | 1 | 42 | 16546  | 1  | 63.25 |
| 43 | 2_WT.nd2 | 1 | 43 | 20056  | 1  | 40.82 |
| 44 | 2_WT.nd2 | 1 | 44 | 22496  | 1  | 81    |
| 45 | 2_WT.nd2 | 1 | 45 | 243549 | 12 | 70.29 |
| 46 | 2_WT.nd2 | 1 | 46 | 21520  | 1  | 70    |
| 47 | 2_WT.nd2 | 1 | 47 | 23400  | 1  | 73    |
| 48 | 2_WT.nd2 | 1 | 48 | 19856  | 1  | 69.64 |
| 49 | 2_WT.nd2 | 1 | 49 | 16393  | 1  | 70.06 |
| 50 | 2_WT.nd2 | 1 | 50 | 47555  | 2  | 63.29 |
| 51 | 2_WT.nd2 | 1 | 51 | 40619  | 2  | 61.07 |
| 52 | 2_WT.nd2 | 1 | 52 | 28632  | 1  | 57    |
| 53 | 2_WT.nd2 | 1 | 53 | 24047  | 1  | 57.87 |
| 54 | 2_WT.nd2 | 1 | 54 | 91836  | 5  | 50    |
| 55 | 2_WT.nd2 | 1 | 55 | 70279  | 3  | 44.01 |
| 56 | 2_WT.nd2 | 1 | 56 | 17700  | 1  | 53.04 |
| 57 | 2_WT.nd2 | 1 | 57 | 153614 | 8  | 0     |
| 58 | 2_WT.nd2 | 1 | 58 | 17504  | 1  | 57.14 |

|     |          |   |     |        |   |       |
|-----|----------|---|-----|--------|---|-------|
| 59  | 2_WT.nd2 | 1 | 59  | 22832  | 1 | 62.37 |
| 60  | 2_WT.nd2 | 1 | 60  | 60400  | 3 | 24    |
| 61  | 2_WT.nd2 | 1 | 61  | 52491  | 3 | 19    |
| 62  | 2_WT.nd2 | 1 | 62  | 68795  | 3 | 62.77 |
| 63  | 2_WT.nd2 | 1 | 63  | 30473  | 2 | 59.08 |
| 64  | 2_WT.nd2 | 1 | 64  | 119427 | 6 | 12    |
| 65  | 2_WT.nd2 | 1 | 65  | 21353  | 1 | 61.72 |
| 66  | 2_WT.nd2 | 1 | 66  | 18934  | 1 | 28.3  |
| 67  | 2_WT.nd2 | 1 | 67  | 42553  | 2 | 6.08  |
| 68  | 2_WT.nd2 | 1 | 68  | 30357  | 2 | 32.45 |
| 69  | 2_WT.nd2 | 1 | 69  | 15717  | 1 | 74.81 |
| 70  | 2_WT.nd2 | 1 | 70  | 27754  | 1 | 30    |
| 71  | 2_WT.nd2 | 1 | 71  | 24638  | 1 | 23.35 |
| 72  | 2_WT.nd2 | 1 | 72  | 42131  | 2 | 2     |
| 73  | 2_WT.nd2 | 1 | 73  | 25339  | 1 | 7.21  |
| 74  | 2_WT.nd2 | 1 | 74  | 22111  | 1 | 6     |
| 75  | 2_WT.nd2 | 1 | 75  | 36996  | 2 | 5     |
| 76  | 2_WT.nd2 | 1 | 76  | 32602  | 2 | 70.06 |
| 77  | 2_WT.nd2 | 1 | 77  | 107075 | 5 | 0     |
| 78  | 2_WT.nd2 | 1 | 78  | 82291  | 4 | 65.49 |
| 79  | 2_WT.nd2 | 1 | 79  | 43028  | 2 | 33.38 |
| 80  | 2_WT.nd2 | 1 | 80  | 57654  | 3 | 44.41 |
| 81  | 2_WT.nd2 | 1 | 81  | 115964 | 6 | 26.25 |
| 82  | 2_WT.nd2 | 1 | 82  | 54170  | 3 | 62.37 |
| 83  | 2_WT.nd2 | 1 | 83  | 53807  | 3 | 58.55 |
| 84  | 2_WT.nd2 | 1 | 84  | 82008  | 4 | 54.34 |
| 85  | 2_WT.nd2 | 1 | 85  | 39731  | 2 | 50.01 |
| 86  | 2_WT.nd2 | 1 | 86  | 74723  | 4 | 35.17 |
| 87  | 2_WT.nd2 | 1 | 87  | 24899  | 1 | 41.76 |
| 88  | 2_WT.nd2 | 1 | 88  | 26668  | 1 | 32.2  |
| 89  | 2_WT.nd2 | 1 | 89  | 31060  | 2 | 42.95 |
| 90  | 2_WT.nd2 | 1 | 90  | 23125  | 1 | 60.14 |
| 91  | 2_WT.nd2 | 1 | 91  | 67595  | 3 | 28.16 |
| 92  | 2_WT.nd2 | 1 | 92  | 20132  | 1 | 41.4  |
| 93  | 2_WT.nd2 | 1 | 93  | 20267  | 1 | 52.8  |
| 94  | 2_WT.nd2 | 1 | 94  | 23405  | 1 | 38.18 |
| 95  | 2_WT.nd2 | 1 | 95  | 50196  | 2 | 82    |
| 96  | 2_WT.nd2 | 1 | 96  | 25976  | 1 | 5.66  |
| 97  | 2_WT.nd2 | 1 | 97  | 18270  | 1 | 52.33 |
| 98  | 2_WT.nd2 | 1 | 98  | 22557  | 1 | 20.59 |
| 99  | 2_WT.nd2 | 1 | 99  | 23568  | 1 | 20.52 |
| 100 | 2_WT.nd2 | 1 | 100 | 31346  | 2 | 26.25 |
| 101 | 2_WT.nd2 | 1 | 101 | 31081  | 2 | 33.97 |

|     |          |   |     |        |    |        |
|-----|----------|---|-----|--------|----|--------|
| 102 | 2_WT.nd2 | 1 | 102 | 35974  | 2  | 38.42  |
| 103 | 2_WT.nd2 | 1 | 103 | 35306  | 2  | 47.01  |
| 104 | 2_WT.nd2 | 1 | 104 | 62802  | 3  | 52.8   |
| 105 | 2_WT.nd2 | 1 | 105 | 32563  | 2  | 55.08  |
| 106 | 2_WT.nd2 | 1 | 106 | 64703  | 3  | 65.44  |
| 107 | 2_WT.nd2 | 1 | 107 | 19628  | 1  | 40.85  |
| 108 | 2_WT.nd2 | 1 | 108 | 21783  | 1  | 35.47  |
| 109 | 2_WT.nd2 | 1 | 109 | 20470  | 1  | 50.91  |
| 110 | 2_WT.nd2 | 1 | 110 | 21240  | 1  | 60.93  |
| 111 | 2_WT.nd2 | 1 | 111 | 20656  | 1  | 71.2   |
| 112 | 2_WT.nd2 | 1 | 112 | 22424  | 1  | 78.6   |
| 113 | 2_WT.nd2 | 1 | 113 | 22500  | 1  | 76.12  |
| 114 | 2_WT.nd2 | 1 | 114 | 25732  | 1  | 88.64  |
| 115 | 2_WT.nd2 | 1 | 115 | 72540  | 4  | 17.8   |
| 116 | 2_WT.nd2 | 1 | 116 | 19576  | 1  | 38.42  |
| 117 | 2_WT.nd2 | 1 | 117 | 56688  | 3  | 11.7   |
| 118 | 2_WT.nd2 | 1 | 118 | 75800  | 4  | 7      |
| 119 | 2_WT.nd2 | 1 | 119 | 19617  | 1  | 14.21  |
| 120 | 2_WT.nd2 | 1 | 120 | 24438  | 1  | 21.1   |
| 121 | 2_WT.nd2 | 2 | 1   | 554210 | 28 | 9      |
| 122 | 2_WT.nd2 | 2 | 2   | 19181  | 1  | 50.92  |
| 123 | 2_WT.nd2 | 2 | 3   | 27376  | 1  | 34.13  |
| 124 | 2_WT.nd2 | 2 | 4   | 15804  | 1  | 99.36  |
| 125 | 2_WT.nd2 | 2 | 5   | 27937  | 1  | 32.02  |
| 126 | 2_WT.nd2 | 2 | 6   | 23919  | 1  | 28.16  |
| 127 | 2_WT.nd2 | 2 | 7   | 22561  | 1  | 37.12  |
| 128 | 2_WT.nd2 | 2 | 8   | 29589  | 1  | 19.03  |
| 129 | 2_WT.nd2 | 2 | 9   | 202389 | 10 | 44     |
| 130 | 2_WT.nd2 | 2 | 10  | 22200  | 1  | 15.03  |
| 131 | 2_WT.nd2 | 2 | 11  | 23135  | 1  | 47.17  |
| 132 | 2_WT.nd2 | 2 | 12  | 26322  | 1  | 12.53  |
| 133 | 2_WT.nd2 | 2 | 13  | 16441  | 1  | 146.73 |
| 134 | 2_WT.nd2 | 2 | 14  | 19476  | 1  | 30     |
| 135 | 2_WT.nd2 | 2 | 15  | 62337  | 3  | 36     |
| 136 | 2_WT.nd2 | 2 | 16  | 49116  | 2  | 47.01  |
| 137 | 2_WT.nd2 | 2 | 17  | 529160 | 26 | 57.87  |
| 138 | 2_WT.nd2 | 2 | 18  | 19056  | 1  | 83     |
| 139 | 2_WT.nd2 | 2 | 19  | 36157  | 2  | 46     |
| 140 | 2_WT.nd2 | 2 | 20  | 39181  | 2  | 38.05  |
| 141 | 2_WT.nd2 | 2 | 21  | 19751  | 1  | 42.76  |
| 142 | 2_WT.nd2 | 2 | 22  | 38338  | 2  | 37     |
| 143 | 2_WT.nd2 | 2 | 23  | 24076  | 1  | 36.67  |
| 144 | 2_WT.nd2 | 2 | 24  | 61830  | 3  | 31.02  |

|     |          |   |    |        |    |        |
|-----|----------|---|----|--------|----|--------|
| 145 | 2_WT.nd2 | 2 | 25 | 48025  | 2  | 30.15  |
| 146 | 2_WT.nd2 | 2 | 26 | 111371 | 6  | 134.47 |
| 147 | 2_WT.nd2 | 2 | 27 | 17922  | 1  | 55     |
| 148 | 2_WT.nd2 | 2 | 28 | 17921  | 1  | 65.8   |
| 149 | 2_WT.nd2 | 2 | 29 | 18949  | 1  | 44.27  |
| 150 | 2_WT.nd2 | 2 | 30 | 22167  | 1  | 37.01  |
| 151 | 2_WT.nd2 | 2 | 31 | 18223  | 1  | 41     |
| 152 | 2_WT.nd2 | 2 | 32 | 60997  | 3  | 131.02 |
| 153 | 2_WT.nd2 | 2 | 33 | 233918 | 12 | 126.06 |
| 154 | 2_WT.nd2 | 2 | 34 | 19034  | 1  | 193    |
| 155 | 2_WT.nd2 | 2 | 35 | 25468  | 1  | 119    |
| 156 | 2_WT.nd2 | 2 | 36 | 21617  | 1  | 109.46 |
| 157 | 2_WT.nd2 | 2 | 37 | 21535  | 1  | 11.4   |
| 158 | 2_WT.nd2 | 2 | 38 | 30917  | 2  | 51.55  |
| 159 | 2_WT.nd2 | 2 | 39 | 19744  | 1  | 62.39  |
| 160 | 2_WT.nd2 | 2 | 40 | 17062  | 1  | 66.71  |
| 161 | 2_WT.nd2 | 2 | 41 | 23198  | 1  | 70.66  |
| 162 | 2_WT.nd2 | 2 | 42 | 23663  | 1  | 82.86  |
| 163 | 2_WT.nd2 | 2 | 43 | 22133  | 1  | 34.44  |
| 164 | 2_WT.nd2 | 2 | 44 | 18667  | 1  | 99.36  |
| 165 | 2_WT.nd2 | 2 | 45 | 30456  | 2  | 14.14  |
| 166 | 2_WT.nd2 | 2 | 46 | 17160  | 1  | 118.87 |
| 167 | 2_WT.nd2 | 2 | 47 | 22268  | 1  | 114.28 |
| 168 | 2_WT.nd2 | 2 | 48 | 24308  | 1  | 5.39   |
| 169 | 2_WT.nd2 | 2 | 49 | 345953 | 17 | 56.46  |
| 170 | 2_WT.nd2 | 2 | 50 | 94987  | 5  | 2      |
| 171 | 2_WT.nd2 | 2 | 51 | 84072  | 4  | 3.16   |
| 172 | 2_WT.nd2 | 2 | 52 | 18920  | 1  | 146.37 |
| 173 | 2_WT.nd2 | 2 | 53 | 62531  | 3  | 7      |
| 174 | 2_WT.nd2 | 2 | 54 | 53928  | 3  | 7.81   |
| 175 | 2_WT.nd2 | 2 | 55 | 50333  | 3  | 14.14  |
| 176 | 2_WT.nd2 | 2 | 56 | 165024 | 8  | 70.21  |
| 177 | 2_WT.nd2 | 2 | 57 | 26397  | 1  | 13.93  |
| 178 | 2_WT.nd2 | 2 | 58 | 30822  | 2  | 14.21  |
| 179 | 2_WT.nd2 | 2 | 59 | 35598  | 2  | 76.49  |
| 180 | 2_WT.nd2 | 2 | 60 | 86262  | 4  | 75.96  |
| 181 | 2_WT.nd2 | 2 | 61 | 103302 | 5  | 77.94  |
| 182 | 2_WT.nd2 | 2 | 62 | 23095  | 1  | 14.56  |
| 183 | 2_WT.nd2 | 2 | 63 | 132176 | 7  | 74.43  |
| 184 | 2_WT.nd2 | 2 | 64 | 96334  | 5  | 67.74  |
| 185 | 2_WT.nd2 | 2 | 65 | 35318  | 2  | 32.25  |
| 186 | 2_WT.nd2 | 2 | 66 | 21175  | 1  | 9.22   |
| 187 | 2_WT.nd2 | 2 | 67 | 34310  | 2  | 90.05  |

|     |          |   |     |        |    |        |
|-----|----------|---|-----|--------|----|--------|
| 188 | 2_WT.nd2 | 2 | 68  | 149758 | 7  | 59.62  |
| 189 | 2_WT.nd2 | 2 | 69  | 20119  | 1  | 5      |
| 190 | 2_WT.nd2 | 2 | 70  | 109837 | 5  | 56.86  |
| 191 | 2_WT.nd2 | 2 | 71  | 42633  | 2  | 87.92  |
| 192 | 2_WT.nd2 | 2 | 72  | 114656 | 6  | 51.89  |
| 193 | 2_WT.nd2 | 2 | 73  | 45767  | 2  | 0      |
| 194 | 2_WT.nd2 | 2 | 74  | 97996  | 5  | 22.85  |
| 195 | 2_WT.nd2 | 2 | 75  | 90903  | 5  | 45.69  |
| 196 | 2_WT.nd2 | 2 | 76  | 105265 | 5  | 39.81  |
| 197 | 2_WT.nd2 | 2 | 77  | 944132 | 47 | 21.93  |
| 198 | 2_WT.nd2 | 2 | 78  | 64488  | 3  | 33.54  |
| 199 | 2_WT.nd2 | 2 | 79  | 49050  | 2  | 30.81  |
| 200 | 2_WT.nd2 | 2 | 80  | 20622  | 1  | 13.89  |
| 201 | 2_WT.nd2 | 2 | 81  | 54354  | 3  | 2      |
| 202 | 2_WT.nd2 | 2 | 82  | 20507  | 1  | 53.6   |
| 203 | 2_WT.nd2 | 2 | 83  | 24661  | 1  | 104.31 |
| 204 | 2_WT.nd2 | 2 | 84  | 19119  | 1  | 20.1   |
| 205 | 2_WT.nd2 | 2 | 85  | 18738  | 1  | 104    |
| 206 | 2_WT.nd2 | 2 | 86  | 22122  | 1  | 0      |
| 207 | 2_WT.nd2 | 2 | 87  | 20907  | 1  | 9.22   |
| 208 | 2_WT.nd2 | 2 | 88  | 247469 | 12 | 0      |
| 209 | 2_WT.nd2 | 2 | 89  | 39785  | 2  | 16     |
| 210 | 2_WT.nd2 | 2 | 90  | 33098  | 2  | 16.49  |
| 211 | 2_WT.nd2 | 2 | 91  | 26949  | 1  | 22.47  |
| 212 | 2_WT.nd2 | 2 | 92  | 37425  | 2  | 22.85  |
| 213 | 2_WT.nd2 | 2 | 93  | 80448  | 4  | 30.02  |
| 214 | 2_WT.nd2 | 2 | 94  | 35650  | 2  | 38.01  |
| 215 | 2_WT.nd2 | 2 | 95  | 51092  | 3  | 36.24  |
| 216 | 2_WT.nd2 | 2 | 96  | 27933  | 1  | 41.19  |
| 217 | 2_WT.nd2 | 2 | 97  | 118038 | 6  | 44.55  |
| 218 | 2_WT.nd2 | 2 | 98  | 32355  | 2  | 38.01  |
| 219 | 2_WT.nd2 | 2 | 99  | 23020  | 1  | 61.29  |
| 220 | 2_WT.nd2 | 2 | 100 | 27660  | 1  | 91.24  |
| 221 | 2_WT.nd2 | 2 | 101 | 60653  | 3  | 90.79  |
| 222 | 2_WT.nd2 | 2 | 102 | 33434  | 2  | 90.14  |
| 223 | 2_WT.nd2 | 2 | 103 | 20186  | 1  | 136.74 |
| 224 | 2_WT.nd2 | 2 | 104 | 27758  | 1  | 103.39 |
| 225 | 2_WT.nd2 | 2 | 105 | 97309  | 5  | 94.34  |
| 226 | 2_WT.nd2 | 2 | 106 | 41073  | 2  | 110.07 |
| 227 | 2_WT.nd2 | 2 | 107 | 19648  | 1  | 125.2  |
| 228 | 2_WT.nd2 | 3 | 1   | 21137  | 1  | 50.93  |
| 229 | 2_WT.nd2 | 3 | 2   | 22137  | 1  | 4      |
| 230 | 2_WT.nd2 | 3 | 3   | 22333  | 1  | 0      |



|     |          |   |    |        |   |        |
|-----|----------|---|----|--------|---|--------|
| 231 | 2_WT.nd2 | 3 | 4  | 20794  | 1 | 3.16   |
| 232 | 2_WT.nd2 | 3 | 5  | 20497  | 1 | 9.43   |
| 233 | 2_WT.nd2 | 3 | 6  | 19680  | 1 | 41.11  |
| 234 | 2_WT.nd2 | 3 | 7  | 23910  | 1 | 39.7   |
| 235 | 2_WT.nd2 | 3 | 8  | 23150  | 1 | 31.38  |
| 236 | 2_WT.nd2 | 3 | 9  | 29323  | 1 | 41.15  |
| 237 | 2_WT.nd2 | 3 | 10 | 22584  | 1 | 40.5   |
| 238 | 2_WT.nd2 | 3 | 11 | 21491  | 1 | 44.28  |
| 239 | 2_WT.nd2 | 3 | 12 | 13088  | 1 | 42.2   |
| 240 | 2_WT.nd2 | 3 | 13 | 31233  | 2 | 42.58  |
| 241 | 2_WT.nd2 | 3 | 14 | 18798  | 1 | 74.09  |
| 242 | 2_WT.nd2 | 3 | 15 | 22759  | 1 | 45.18  |
| 243 | 2_WT.nd2 | 3 | 16 | 19213  | 1 | 49.16  |
| 244 | 2_WT.nd2 | 3 | 17 | 19830  | 1 | 36.77  |
| 245 | 2_WT.nd2 | 3 | 18 | 17845  | 1 | 69     |
| 246 | 2_WT.nd2 | 3 | 19 | 17779  | 1 | 75.06  |
| 247 | 2_WT.nd2 | 3 | 20 | 18517  | 1 | 75.33  |
| 248 | 2_WT.nd2 | 3 | 21 | 19084  | 1 | 15.26  |
| 249 | 2_WT.nd2 | 3 | 22 | 18711  | 1 | 15.3   |
| 250 | 2_WT.nd2 | 3 | 23 | 20655  | 1 | 8.94   |
| 251 | 2_WT.nd2 | 3 | 24 | 34828  | 2 | 6      |
| 252 | 2_WT.nd2 | 3 | 25 | 18451  | 1 | 6      |
| 253 | 2_WT.nd2 | 3 | 26 | 19981  | 1 | 87.09  |
| 254 | 2_WT.nd2 | 3 | 27 | 22064  | 1 | 12     |
| 255 | 2_WT.nd2 | 3 | 28 | 18597  | 1 | 21     |
| 256 | 2_WT.nd2 | 3 | 29 | 19069  | 1 | 38.12  |
| 257 | 2_WT.nd2 | 3 | 30 | 23686  | 1 | 31     |
| 258 | 2_WT.nd2 | 3 | 31 | 19318  | 1 | 30     |
| 259 | 2_WT.nd2 | 3 | 32 | 28285  | 1 | 26.17  |
| 260 | 2_WT.nd2 | 3 | 33 | 22400  | 1 | 23     |
| 261 | 2_WT.nd2 | 3 | 34 | 58355  | 3 | 21.59  |
| 262 | 2_WT.nd2 | 3 | 35 | 16373  | 1 | 126.83 |
| 263 | 2_WT.nd2 | 3 | 36 | 92800  | 5 | 16     |
| 264 | 2_WT.nd2 | 3 | 37 | 22296  | 1 | 16.03  |
| 265 | 2_WT.nd2 | 3 | 38 | 135579 | 7 | 6.08   |
| 266 | 2_WT.nd2 | 3 | 39 | 89618  | 4 | 7.62   |
| 267 | 2_WT.nd2 | 3 | 40 | 81082  | 4 | 3.61   |
| 268 | 2_WT.nd2 | 3 | 41 | 84785  | 4 | 5      |
| 269 | 2_WT.nd2 | 3 | 42 | 82112  | 4 | 2      |
| 270 | 2_WT.nd2 | 3 | 43 | 48258  | 2 | 5      |
| 271 | 2_WT.nd2 | 3 | 44 | 65006  | 3 | 1.41   |
| 272 | 2_WT.nd2 | 3 | 45 | 20284  | 1 | 3      |
| 273 | 2_WT.nd2 | 3 | 46 | 54816  | 3 | 7.28   |

|     |          |   |    |        |    |        |
|-----|----------|---|----|--------|----|--------|
| 274 | 2_WT.nd2 | 3 | 47 | 69383  | 3  | 7      |
| 275 | 2_WT.nd2 | 3 | 48 | 78301  | 4  | 7.07   |
| 276 | 2_WT.nd2 | 3 | 49 | 21581  | 1  | 17.46  |
| 277 | 2_WT.nd2 | 3 | 50 | 133611 | 7  | 5      |
| 278 | 2_WT.nd2 | 3 | 51 | 132068 | 7  | 5.39   |
| 279 | 2_WT.nd2 | 3 | 52 | 25851  | 1  | 10.77  |
| 280 | 2_WT.nd2 | 3 | 53 | 116247 | 6  | 10.77  |
| 281 | 2_WT.nd2 | 3 | 54 | 21393  | 1  | 31.02  |
| 282 | 2_WT.nd2 | 3 | 55 | 18802  | 1  | 14.32  |
| 283 | 2_WT.nd2 | 3 | 56 | 15873  | 1  | 86.38  |
| 284 | 2_WT.nd2 | 3 | 57 | 20642  | 1  | 101.12 |
| 285 | 2_WT.nd2 | 3 | 58 | 20335  | 1  | 62.2   |
| 286 | 2_WT.nd2 | 3 | 59 | 17772  | 1  | 68.07  |
| 287 | 2_WT.nd2 | 3 | 60 | 28464  | 1  | 64.4   |
| 288 | 2_WT.nd2 | 3 | 61 | 45806  | 2  | 60.22  |
| 289 | 2_WT.nd2 | 3 | 62 | 140592 | 7  | 0      |
| 290 | 2_WT.nd2 | 3 | 63 | 110511 | 5  | 0      |
| 291 | 2_WT.nd2 | 3 | 64 | 21425  | 1  | 46.84  |
| 292 | 2_WT.nd2 | 3 | 65 | 95104  | 5  | 0      |
| 293 | 2_WT.nd2 | 3 | 66 | 59367  | 3  | 0      |
| 294 | 2_WT.nd2 | 3 | 67 | 107758 | 5  | 30.41  |
| 295 | 2_WT.nd2 | 3 | 68 | 28367  | 1  | 50.92  |
| 296 | 2_WT.nd2 | 3 | 69 | 59510  | 3  | 28.3   |
| 297 | 2_WT.nd2 | 3 | 70 | 38168  | 2  | 55.66  |
| 298 | 2_WT.nd2 | 3 | 71 | 38004  | 2  | 26.4   |
| 299 | 2_WT.nd2 | 3 | 72 | 40406  | 2  | 41.18  |
| 300 | 2_WT.nd2 | 3 | 73 | 38959  | 2  | 61.1   |
| 301 | 2_WT.nd2 | 3 | 74 | 65363  | 3  | 26.17  |
| 302 | 2_WT.nd2 | 3 | 75 | 281749 | 14 | 0      |
| 303 | 2_WT.nd2 | 3 | 76 | 42747  | 2  | 25.61  |
| 304 | 2_WT.nd2 | 3 | 77 | 22632  | 1  | 113.14 |
| 305 | 2_WT.nd2 | 3 | 78 | 97479  | 5  | 18.38  |
| 306 | 2_WT.nd2 | 3 | 79 | 145019 | 7  | 0      |
| 307 | 2_WT.nd2 | 3 | 80 | 58360  | 3  | 23.6   |
| 308 | 2_WT.nd2 | 3 | 81 | 34934  | 2  | 28.18  |
| 309 | 2_WT.nd2 | 3 | 82 | 21205  | 1  | 57.97  |
| 310 | 2_WT.nd2 | 3 | 83 | 94030  | 5  | 10     |
| 311 | 2_WT.nd2 | 3 | 84 | 46540  | 2  | 27.89  |
| 312 | 2_WT.nd2 | 3 | 85 | 41097  | 2  | 8.6    |
| 313 | 2_WT.nd2 | 3 | 86 | 62710  | 3  | 5      |
| 314 | 2_WT.nd2 | 3 | 87 | 19883  | 1  | 15.23  |
| 315 | 2_WT.nd2 | 3 | 88 | 68877  | 3  | 2.24   |
| 316 | 2_WT.nd2 | 3 | 89 | 19635  | 1  | 35     |

|     |          |   |     |        |    |        |
|-----|----------|---|-----|--------|----|--------|
| 317 | 2_WT.nd2 | 3 | 90  | 22657  | 1  | 131.1  |
| 318 | 2_WT.nd2 | 3 | 91  | 19420  | 1  | 45.79  |
| 319 | 2_WT.nd2 | 3 | 92  | 21104  | 1  | 43.57  |
| 320 | 2_WT.nd2 | 3 | 93  | 18854  | 1  | 92.96  |
| 321 | 2_WT.nd2 | 3 | 94  | 50187  | 2  | 52.5   |
| 322 | 2_WT.nd2 | 3 | 95  | 34336  | 2  | 59.23  |
| 323 | 2_WT.nd2 | 3 | 96  | 18067  | 1  | 26.17  |
| 324 | 2_WT.nd2 | 3 | 97  | 19842  | 1  | 68.03  |
| 325 | 2_WT.nd2 | 3 | 98  | 128618 | 6  | 50.33  |
| 326 | 2_WT.nd2 | 3 | 99  | 18238  | 1  | 58.05  |
| 327 | 2_WT.nd2 | 3 | 100 | 99915  | 5  | 46.86  |
| 328 | 2_WT.nd2 | 3 | 101 | 155416 | 8  | 42.72  |
| 329 | 2_WT.nd2 | 3 | 102 | 292313 | 15 | 37.12  |
| 330 | 2_WT.nd2 | 3 | 103 | 18831  | 1  | 38.83  |
| 331 | 2_WT.nd2 | 3 | 104 | 41652  | 2  | 31     |
| 332 | 2_WT.nd2 | 3 | 105 | 20382  | 1  | 10     |
| 333 | 2_WT.nd2 | 3 | 106 | 181176 | 9  | 30.36  |
| 334 | 2_WT.nd2 | 3 | 107 | 127674 | 6  | 28.86  |
| 335 | 2_WT.nd2 | 3 | 108 | 81183  | 4  | 39.32  |
| 336 | 2_WT.nd2 | 3 | 109 | 97917  | 5  | 25.02  |
| 337 | 2_WT.nd2 | 3 | 110 | 79217  | 4  | 34     |
| 338 | 2_WT.nd2 | 3 | 111 | 183454 | 9  | 35.06  |
| 339 | 2_WT.nd2 | 3 | 112 | 88917  | 4  | 47.1   |
| 340 | 2_WT.nd2 | 3 | 113 | 24884  | 1  | 1      |
| 341 | 2_WT.nd2 | 3 | 114 | 25335  | 1  | 0      |
| 342 | 2_WT.nd2 | 3 | 115 | 43754  | 2  | 1.41   |
| 343 | 2_WT.nd2 | 3 | 116 | 131217 | 7  | 68.18  |
| 344 | 2_WT.nd2 | 3 | 117 | 222769 | 11 | 42.95  |
| 345 | 2_WT.nd2 | 3 | 118 | 170705 | 8  | 51.2   |
| 346 | 2_WT.nd2 | 3 | 119 | 49549  | 2  | 58.42  |
| 347 | 2_WT.nd2 | 3 | 120 | 188110 | 9  | 101.49 |
| 348 | 2_WT.nd2 | 3 | 121 | 21641  | 1  | 119.27 |
| 349 | 2_WT.nd2 | 3 | 122 | 100198 | 5  | 31.95  |
| 350 | 2_WT.nd2 | 3 | 123 | 137053 | 7  | 55.79  |
| 351 | 2_WT.nd2 | 3 | 124 | 65960  | 3  | 66.29  |
| 352 | 2_WT.nd2 | 3 | 125 | 139688 | 7  | 96.18  |
| 353 | 2_WT.nd2 | 3 | 126 | 120193 | 6  | 0      |
| 354 | 2_WT.nd2 | 3 | 127 | 45236  | 2  | 61.39  |
| 355 | 2_WT.nd2 | 3 | 128 | 59544  | 3  | 77.28  |
| 356 | 2_WT.nd2 | 3 | 129 | 130099 | 6  | 91.41  |
| 357 | 2_WT.nd2 | 3 | 130 | 28207  | 1  | 95.69  |
| 358 | 2_WT.nd2 | 3 | 131 | 61409  | 3  | 0      |
| 359 | 2_WT.nd2 | 3 | 132 | 140632 | 7  | 83.74  |

|     |          |   |     |        |    |        |
|-----|----------|---|-----|--------|----|--------|
| 360 | 2_WT.nd2 | 3 | 133 | 23462  | 1  | 26.02  |
| 361 | 2_WT.nd2 | 3 | 134 | 49971  | 2  | 61.98  |
| 362 | 2_WT.nd2 | 3 | 135 | 48696  | 2  | 67.19  |
| 363 | 2_WT.nd2 | 3 | 136 | 116377 | 6  | 73.08  |
| 364 | 2_WT.nd2 | 3 | 137 | 21549  | 1  | 84.2   |
| 365 | 2_WT.nd2 | 3 | 138 | 57708  | 3  | 81.25  |
| 366 | 2_WT.nd2 | 3 | 139 | 81917  | 4  | 87.56  |
| 367 | 2_WT.nd2 | 3 | 140 | 22927  | 1  | 77.47  |
| 368 | 2_WT.nd2 | 3 | 141 | 29380  | 1  | 91.68  |
| 369 | 2_WT.nd2 | 3 | 142 | 19053  | 1  | 31.06  |
| 370 | 2_WT.nd2 | 3 | 143 | 51973  | 3  | 10.77  |
| 371 | 2_WT.nd2 | 3 | 144 | 137665 | 7  | 126.37 |
| 372 | 2_WT.nd2 | 3 | 145 | 342440 | 17 | 140.62 |
| 373 | 2_WT.nd2 | 3 | 146 | 22817  | 1  | 102.46 |
| 374 | 2_WT.nd2 | 3 | 147 | 30149  | 2  | 117.72 |
| 375 | 2_WT.nd2 | 3 | 148 | 22800  | 1  | 122.54 |
| 376 | 2_WT.nd2 | 3 | 149 | 251717 | 13 | 166.9  |
| 377 | 2_WT.nd2 | 3 | 150 | 46652  | 2  | 47.51  |
| 378 | 2_WT.nd2 | 3 | 151 | 32615  | 2  | 56.57  |
| 379 | 2_WT.nd2 | 3 | 152 | 19369  | 1  | 61.72  |
| 380 | 2_WT.nd2 | 3 | 153 | 23649  | 1  | 58.24  |
| 381 | 2_WT.nd2 | 3 | 154 | 27583  | 1  | 56.3   |
| 382 | 2_WT.nd2 | 3 | 155 | 38406  | 2  | 65.37  |
| 383 | 2_WT.nd2 | 3 | 156 | 21910  | 1  | 90.43  |
| 384 | 2_WT.nd2 | 3 | 157 | 21063  | 1  | 76     |
| 385 | 2_WT.nd2 | 3 | 158 | 39706  | 2  | 120.28 |
| 386 | 2_WT.nd2 | 3 | 159 | 18124  | 1  | 0      |
| 387 | 2_WT.nd2 | 3 | 160 | 22121  | 1  | 88.53  |
| 388 | 2_WT.nd2 | 3 | 161 | 61257  | 3  | 69.43  |
| 389 | 2_WT.nd2 | 3 | 162 | 23563  | 1  | 60.21  |
| 390 | 2_WT.nd2 | 3 | 163 | 20005  | 1  | 6.32   |
| 391 | 2_WT.nd2 | 3 | 164 | 21402  | 1  | 66.94  |
| 392 | 2_WT.nd2 | 3 | 165 | 28769  | 1  | 14     |
| 393 | 2_WT.nd2 | 3 | 166 | 31404  | 2  | 73.25  |
| 394 | 2_WT.nd2 | 3 | 167 | 20723  | 1  | 46.1   |
| 395 | 2_WT.nd2 | 3 | 168 | 20460  | 1  | 85.73  |
| 396 | 2_WT.nd2 | 3 | 169 | 24335  | 1  | 6      |
| 397 | 2_WT.nd2 | 3 | 170 | 21228  | 1  | 59.46  |
| 398 | 2_WT.nd2 | 3 | 171 | 24063  | 1  | 46.01  |
| 399 | 2_WT.nd2 | 3 | 172 | 27562  | 1  | 3.61   |
| 400 | 2_WT.nd2 | 3 | 173 | 24538  | 1  | 52.24  |
| 401 | 2_WT.nd2 | 3 | 174 | 62254  | 3  | 50.64  |
| 402 | 2_WT.nd2 | 3 | 175 | 33703  | 2  | 99.54  |

|     |          |   |     |        |    |        |
|-----|----------|---|-----|--------|----|--------|
| 403 | 2_WT.nd2 | 3 | 176 | 19649  | 1  | 23     |
| 404 | 2_WT.nd2 | 3 | 177 | 37504  | 2  | 42.01  |
| 405 | 2_WT.nd2 | 3 | 178 | 48192  | 2  | 78.29  |
| 406 | 2_WT.nd2 | 3 | 179 | 42692  | 2  | 48.47  |
| 407 | 2_WT.nd2 | 3 | 180 | 41857  | 2  | 38.47  |
| 408 | 2_WT.nd2 | 3 | 181 | 29670  | 1  | 35.51  |
| 409 | 2_WT.nd2 | 3 | 182 | 19425  | 1  | 29.15  |
| 410 | 2_WT.nd2 | 3 | 183 | 20918  | 1  | 27.2   |
| 411 | 2_WT.nd2 | 3 | 184 | 24320  | 1  | 39.82  |
| 412 | 2_WT.nd2 | 3 | 185 | 25919  | 1  | 12.81  |
| 413 | 2_WT.nd2 | 3 | 186 | 20151  | 1  | 169.76 |
| 414 | 2_WT.nd2 | 3 | 187 | 20009  | 1  | 53.54  |
| 415 | 2_WT.nd2 | 3 | 188 | 20241  | 1  | 49.82  |
| 416 | 2_WT.nd2 | 3 | 189 | 28633  | 1  | 8.06   |
| 417 | 2_WT.nd2 | 3 | 190 | 39759  | 2  | 2      |
| 418 | 2_WT.nd2 | 3 | 191 | 21304  | 1  | 125.59 |
| 419 | 2_WT.nd2 | 3 | 192 | 11809  | 1  | 49.41  |
| 420 | 2_WT.nd2 | 3 | 193 | 23643  | 1  | 5.39   |
| 421 | 2_WT.nd2 | 3 | 194 | 18156  | 1  | 124.06 |
| 422 | 2_WT.nd2 | 3 | 195 | 32740  | 2  | 12.04  |
| 423 | 2_WT.nd2 | 3 | 196 | 22167  | 1  | 180.24 |
| 424 | 2_WT.nd2 | 3 | 197 | 37204  | 2  | 47.07  |
| 425 | 2_WT.nd2 | 3 | 198 | 147809 | 7  | 75.5   |
| 426 | 2_WT.nd2 | 3 | 199 | 123659 | 6  | 0      |
| 427 | 2_WT.nd2 | 3 | 200 | 64461  | 3  | 82.97  |
| 428 | 2_WT.nd2 | 3 | 201 | 161354 | 8  | 64.56  |
| 429 | 2_WT.nd2 | 3 | 202 | 143859 | 7  | 0      |
| 430 | 2_WT.nd2 | 3 | 203 | 220779 | 11 | 0      |
| 431 | 2_WT.nd2 | 3 | 204 | 138123 | 7  | 86.68  |
| 432 | 2_WT.nd2 | 3 | 205 | 120731 | 6  | 106.51 |
| 433 | 2_WT.nd2 | 3 | 206 | 109210 | 5  | 56.3   |
| 434 | 2_WT.nd2 | 3 | 207 | 385895 | 19 | 95.13  |
| 435 | 2_WT.nd2 | 3 | 208 | 58727  | 3  | 77.79  |
| 436 | 2_WT.nd2 | 3 | 209 | 59078  | 3  | 54.42  |
| 437 | 2_WT.nd2 | 3 | 210 | 26443  | 1  | 112.54 |
| 438 | 2_WT.nd2 | 3 | 211 | 131733 | 7  | 101.24 |
| 439 | 2_WT.nd2 | 3 | 212 | 86599  | 4  | 106.23 |
| 440 | 2_WT.nd2 | 3 | 213 | 47969  | 2  | 52.8   |
| 441 | 2_WT.nd2 | 3 | 214 | 88452  | 4  | 51.11  |
| 442 | 2_WT.nd2 | 3 | 215 | 50557  | 3  | 116.28 |
| 443 | 2_WT.nd2 | 3 | 216 | 19640  | 1  | 187.01 |
| 444 | 2_WT.nd2 | 3 | 217 | 20735  | 1  | 53.04  |
| 445 | 2_WT.nd2 | 3 | 218 | 92055  | 5  | 110.68 |

|     |          |   |     |        |    |        |
|-----|----------|---|-----|--------|----|--------|
| 446 | 2_WT.nd2 | 3 | 219 | 37522  | 2  | 52.01  |
| 447 | 2_WT.nd2 | 4 | 1   | 22574  | 1  | 23.41  |
| 448 | 2_WT.nd2 | 4 | 2   | 19977  | 1  | 2.83   |
| 449 | 2_WT.nd2 | 4 | 3   | 19605  | 1  | 0      |
| 450 | 2_WT.nd2 | 4 | 4   | 18406  | 1  | 6      |
| 451 | 2_WT.nd2 | 4 | 5   | 15907  | 1  | 14.87  |
| 452 | 2_WT.nd2 | 4 | 6   | 131739 | 7  | 12.73  |
| 453 | 2_WT.nd2 | 4 | 7   | 191578 | 10 | 38.95  |
| 454 | 2_WT.nd2 | 4 | 8   | 96857  | 5  | 64.38  |
| 455 | 2_WT.nd2 | 4 | 9   | 17124  | 1  | 61.91  |
| 456 | 2_WT.nd2 | 4 | 10  | 22264  | 1  | 86.98  |
| 457 | 2_WT.nd2 | 4 | 11  | 17269  | 1  | 77.08  |
| 458 | 2_WT.nd2 | 4 | 12  | 21041  | 1  | 50.61  |
| 459 | 2_WT.nd2 | 4 | 13  | 25481  | 1  | 55.04  |
| 460 | 2_WT.nd2 | 4 | 14  | 18608  | 1  | 21.26  |
| 461 | 2_WT.nd2 | 4 | 15  | 48196  | 2  | 33.6   |
| 462 | 2_WT.nd2 | 4 | 16  | 28093  | 1  | 61.35  |
| 463 | 2_WT.nd2 | 4 | 17  | 22969  | 1  | 43.83  |
| 464 | 2_WT.nd2 | 4 | 18  | 30167  | 2  | 40.25  |
| 465 | 2_WT.nd2 | 4 | 19  | 27539  | 1  | 29.53  |
| 466 | 2_WT.nd2 | 4 | 20  | 28935  | 1  | 26.08  |
| 467 | 2_WT.nd2 | 4 | 21  | 24556  | 1  | 18.38  |
| 468 | 2_WT.nd2 | 4 | 22  | 22980  | 1  | 13.6   |
| 469 | 2_WT.nd2 | 4 | 23  | 25346  | 1  | 17.46  |
| 470 | 2_WT.nd2 | 4 | 24  | 20070  | 1  | 6.4    |
| 471 | 2_WT.nd2 | 4 | 25  | 24800  | 1  | 0      |
| 472 | 2_WT.nd2 | 4 | 26  | 22159  | 1  | 0      |
| 473 | 2_WT.nd2 | 4 | 27  | 26198  | 1  | 12.73  |
| 474 | 2_WT.nd2 | 4 | 28  | 23538  | 1  | 102.08 |
| 475 | 2_WT.nd2 | 4 | 29  | 24875  | 1  | 27.02  |
| 476 | 2_WT.nd2 | 4 | 30  | 17483  | 1  | 92.14  |
| 477 | 2_WT.nd2 | 4 | 31  | 17332  | 1  | 104.8  |
| 478 | 2_WT.nd2 | 4 | 32  | 20745  | 1  | 81.94  |
| 479 | 2_WT.nd2 | 4 | 33  | 16983  | 1  | 105    |
| 480 | 2_WT.nd2 | 4 | 34  | 50588  | 3  | 28.16  |
| 481 | 2_WT.nd2 | 4 | 35  | 51841  | 3  | 69.32  |
| 482 | 2_WT.nd2 | 4 | 36  | 36036  | 2  | 23.09  |
| 483 | 2_WT.nd2 | 4 | 37  | 62893  | 3  | 56.57  |
| 484 | 2_WT.nd2 | 4 | 38  | 41812  | 2  | 18.68  |
| 485 | 2_WT.nd2 | 4 | 39  | 21346  | 1  | 7.21   |
| 486 | 2_WT.nd2 | 4 | 40  | 21237  | 1  | 58.69  |
| 487 | 2_WT.nd2 | 4 | 41  | 23532  | 1  | 57.94  |
| 488 | 2_WT.nd2 | 4 | 42  | 66532  | 3  | 13.34  |

|     |          |   |    |        |    |       |
|-----|----------|---|----|--------|----|-------|
| 489 | 2_WT.nd2 | 4 | 43 | 21597  | 1  | 57.27 |
| 490 | 2_WT.nd2 | 4 | 44 | 20674  | 1  | 5.1   |
| 491 | 2_WT.nd2 | 4 | 45 | 23551  | 1  | 46.17 |
| 492 | 2_WT.nd2 | 4 | 46 | 50291  | 3  | 5.83  |
| 493 | 2_WT.nd2 | 4 | 47 | 21293  | 1  | 4     |
| 494 | 2_WT.nd2 | 4 | 48 | 22761  | 1  | 5.39  |
| 495 | 2_WT.nd2 | 4 | 49 | 24870  | 1  | 3.16  |
| 496 | 2_WT.nd2 | 4 | 50 | 27567  | 1  | 0     |
| 497 | 2_WT.nd2 | 4 | 51 | 41025  | 2  | 57.71 |
| 498 | 2_WT.nd2 | 4 | 52 | 32940  | 2  | 3.16  |
| 499 | 2_WT.nd2 | 4 | 53 | 74546  | 4  | 2.24  |
| 500 | 2_WT.nd2 | 4 | 54 | 57902  | 3  | 5.83  |
| 501 | 2_WT.nd2 | 4 | 55 | 21260  | 1  | 13.42 |
| 502 | 2_WT.nd2 | 4 | 56 | 47200  | 2  | 0     |
| 503 | 2_WT.nd2 | 4 | 57 | 30203  | 2  | 21.1  |
| 504 | 2_WT.nd2 | 4 | 58 | 55378  | 3  | 23.77 |
| 505 | 2_WT.nd2 | 4 | 59 | 27123  | 1  | 25.5  |
| 506 | 2_WT.nd2 | 4 | 60 | 33377  | 2  | 1     |
| 507 | 2_WT.nd2 | 4 | 61 | 40542  | 2  | 26.93 |
| 508 | 2_WT.nd2 | 4 | 62 | 25878  | 1  | 0     |
| 509 | 2_WT.nd2 | 4 | 63 | 17541  | 1  | 24.76 |
| 510 | 2_WT.nd2 | 4 | 64 | 18889  | 1  | 18.87 |
| 511 | 2_WT.nd2 | 4 | 65 | 99397  | 5  | 25.08 |
| 512 | 2_WT.nd2 | 4 | 66 | 200340 | 10 | 20.25 |
| 513 | 2_WT.nd2 | 4 | 67 | 101347 | 5  | 28.16 |
| 514 | 2_WT.nd2 | 4 | 68 | 62966  | 3  | 17.8  |
| 515 | 2_WT.nd2 | 4 | 69 | 137826 | 7  | 16.28 |
| 516 | 2_WT.nd2 | 4 | 70 | 113665 | 6  | 20.62 |
| 517 | 2_WT.nd2 | 4 | 71 | 183624 | 9  | 14.32 |
| 518 | 2_WT.nd2 | 4 | 72 | 37093  | 2  | 27.07 |
| 519 | 2_WT.nd2 | 4 | 73 | 100035 | 5  | 8     |
| 520 | 2_WT.nd2 | 4 | 74 | 100134 | 5  | 15.81 |
| 521 | 2_WT.nd2 | 4 | 75 | 107606 | 5  | 3.16  |
| 522 | 2_WT.nd2 | 4 | 76 | 63055  | 3  | 74.33 |
| 523 | 2_WT.nd2 | 4 | 77 | 94566  | 5  | 20.02 |
| 524 | 2_WT.nd2 | 4 | 78 | 133837 | 7  | 22    |
| 525 | 2_WT.nd2 | 4 | 79 | 38076  | 2  | 0     |
| 526 | 2_WT.nd2 | 4 | 80 | 62873  | 3  | 28.46 |
| 527 | 2_WT.nd2 | 4 | 81 | 95197  | 5  | 29    |
| 528 | 2_WT.nd2 | 4 | 82 | 21253  | 1  | 40    |
| 529 | 2_WT.nd2 | 4 | 83 | 23341  | 1  | 14.32 |
| 530 | 2_WT.nd2 | 4 | 84 | 30265  | 2  | 29    |
| 531 | 2_WT.nd2 | 4 | 85 | 91715  | 5  | 79.62 |

|     |          |   |     |        |   |       |
|-----|----------|---|-----|--------|---|-------|
| 532 | 2_WT.nd2 | 4 | 86  | 52043  | 3 | 21    |
| 533 | 2_WT.nd2 | 4 | 87  | 29880  | 1 | 74.81 |
| 534 | 2_WT.nd2 | 4 | 88  | 28286  | 1 | 19.7  |
| 535 | 2_WT.nd2 | 4 | 89  | 65684  | 3 | 66.37 |
| 536 | 2_WT.nd2 | 4 | 90  | 42512  | 2 | 17    |
| 537 | 2_WT.nd2 | 4 | 91  | 29904  | 1 | 15.3  |
| 538 | 2_WT.nd2 | 4 | 92  | 56533  | 3 | 61.03 |
| 539 | 2_WT.nd2 | 4 | 93  | 36649  | 2 | 12    |
| 540 | 2_WT.nd2 | 4 | 94  | 28271  | 1 | 40.85 |
| 541 | 2_WT.nd2 | 4 | 95  | 49969  | 2 | 8.06  |
| 542 | 2_WT.nd2 | 4 | 96  | 24815  | 1 | 67    |
| 543 | 2_WT.nd2 | 4 | 97  | 31159  | 2 | 24    |
| 544 | 2_WT.nd2 | 4 | 98  | 47558  | 2 | 58.08 |
| 545 | 2_WT.nd2 | 4 | 99  | 26542  | 1 | 27.02 |
| 546 | 2_WT.nd2 | 4 | 100 | 21675  | 1 | 3.16  |
| 547 | 2_WT.nd2 | 4 | 101 | 20491  | 1 | 43    |
| 548 | 2_WT.nd2 | 4 | 102 | 22449  | 1 | 6.71  |
| 549 | 2_WT.nd2 | 4 | 103 | 72373  | 4 | 54.33 |
| 550 | 2_WT.nd2 | 4 | 104 | 37652  | 2 | 4.12  |
| 551 | 2_WT.nd2 | 4 | 105 | 33923  | 2 | 52.95 |
| 552 | 2_WT.nd2 | 4 | 106 | 115840 | 6 | 43.08 |
| 553 | 2_WT.nd2 | 4 | 107 | 46912  | 2 | 23.32 |
| 554 | 2_WT.nd2 | 4 | 108 | 46182  | 2 | 4     |
| 555 | 2_WT.nd2 | 4 | 109 | 20652  | 1 | 59.01 |
| 556 | 2_WT.nd2 | 4 | 110 | 34576  | 2 | 0     |
| 557 | 2_WT.nd2 | 4 | 111 | 47081  | 2 | 35.78 |
| 558 | 2_WT.nd2 | 4 | 112 | 31873  | 2 | 32.25 |
| 559 | 2_WT.nd2 | 4 | 113 | 22612  | 1 | 0     |
| 560 | 2_WT.nd2 | 4 | 114 | 19989  | 1 | 34.71 |
| 561 | 2_WT.nd2 | 4 | 115 | 22456  | 1 | 5.83  |
| 562 | 2_WT.nd2 | 4 | 116 | 20049  | 1 | 7.81  |
| 563 | 2_WT.nd2 | 4 | 117 | 21327  | 1 | 24.04 |
| 564 | 2_WT.nd2 | 4 | 118 | 18974  | 1 | 3     |
| 565 | 2_WT.nd2 | 4 | 119 | 60821  | 3 | 61.98 |
| 566 | 2_WT.nd2 | 4 | 120 | 31985  | 2 | 62.37 |
| 567 | 2_WT.nd2 | 4 | 121 | 18689  | 1 | 69.35 |
| 568 | 2_WT.nd2 | 4 | 122 | 24203  | 1 | 23.85 |
| 569 | 2_WT.nd2 | 4 | 123 | 18110  | 1 | 28.43 |
| 570 | 2_WT.nd2 | 4 | 124 | 23897  | 1 | 51.48 |
| 571 | 2_WT.nd2 | 4 | 125 | 38301  | 2 | 52.2  |
| 572 | 2_WT.nd2 | 4 | 126 | 21633  | 1 | 36.07 |
| 573 | 2_WT.nd2 | 4 | 127 | 28691  | 1 | 46.39 |
| 574 | 2_WT.nd2 | 4 | 128 | 22728  | 1 | 42.43 |



|     |          |   |     |        |    |        |
|-----|----------|---|-----|--------|----|--------|
| 575 | 2_WT.nd2 | 4 | 129 | 20071  | 1  | 57     |
| 576 | 2_WT.nd2 | 4 | 130 | 33024  | 2  | 100.77 |
| 577 | 2_WT.nd2 | 4 | 131 | 65988  | 3  | 38.64  |
| 578 | 2_WT.nd2 | 4 | 132 | 18504  | 1  | 105.68 |
| 579 | 2_WT.nd2 | 4 | 133 | 22526  | 1  | 49.65  |
| 580 | 2_WT.nd2 | 4 | 134 | 25833  | 1  | 36.14  |
| 581 | 2_WT.nd2 | 4 | 135 | 20266  | 1  | 96.9   |
| 582 | 2_WT.nd2 | 4 | 136 | 41014  | 2  | 105.55 |
| 583 | 2_WT.nd2 | 4 | 137 | 23055  | 1  | 92.91  |
| 584 | 2_WT.nd2 | 4 | 138 | 20839  | 1  | 42.06  |
| 585 | 2_WT.nd2 | 4 | 139 | 19945  | 1  | 60.11  |
| 586 | 2_WT.nd2 | 4 | 140 | 37378  | 2  | 26.4   |
| 587 | 2_WT.nd2 | 4 | 141 | 111165 | 6  | 86.76  |
| 588 | 2_WT.nd2 | 4 | 142 | 34595  | 2  | 26.17  |
| 589 | 2_WT.nd2 | 4 | 143 | 98734  | 5  | 26.4   |
| 590 | 2_WT.nd2 | 4 | 144 | 29007  | 1  | 92.85  |
| 591 | 2_WT.nd2 | 4 | 145 | 132874 | 7  | 31.38  |
| 592 | 2_WT.nd2 | 4 | 146 | 39922  | 2  | 24.41  |
| 593 | 2_WT.nd2 | 4 | 147 | 163619 | 8  | 85     |
| 594 | 2_WT.nd2 | 4 | 148 | 72624  | 4  | 58.14  |
| 595 | 2_WT.nd2 | 4 | 149 | 82628  | 4  | 87.28  |
| 596 | 2_WT.nd2 | 4 | 150 | 17730  | 1  | 77.62  |
| 597 | 2_WT.nd2 | 4 | 151 | 47675  | 2  | 83.82  |
| 598 | 2_WT.nd2 | 4 | 152 | 63551  | 3  | 32.7   |
| 599 | 2_WT.nd2 | 4 | 153 | 77259  | 4  | 38.6   |
| 600 | 2_WT.nd2 | 4 | 154 | 125958 | 6  | 62.01  |
| 601 | 2_WT.nd2 | 4 | 155 | 30759  | 2  | 43.42  |
| 602 | 2_WT.nd2 | 4 | 156 | 113852 | 6  | 65.55  |
| 603 | 2_WT.nd2 | 4 | 157 | 206981 | 10 | 66.71  |
| 604 | 2_WT.nd2 | 4 | 158 | 243954 | 12 | 77.1   |
| 605 | 2_WT.nd2 | 4 | 159 | 32872  | 2  | 46.87  |
| 606 | 2_WT.nd2 | 4 | 160 | 279059 | 14 | 72.92  |
| 607 | 2_WT.nd2 | 4 | 161 | 18561  | 1  | 75.43  |
| 608 | 2_WT.nd2 | 4 | 162 | 65739  | 3  | 50.25  |
| 609 | 2_WT.nd2 | 4 | 163 | 26393  | 1  | 91.14  |
| 610 | 2_WT.nd2 | 4 | 164 | 140133 | 7  | 23.02  |
| 611 | 2_WT.nd2 | 4 | 165 | 80879  | 4  | 85.59  |
| 612 | 2_WT.nd2 | 4 | 166 | 149205 | 7  | 88     |
| 613 | 2_WT.nd2 | 4 | 167 | 58275  | 3  | 4      |
| 614 | 2_WT.nd2 | 4 | 168 | 293736 | 15 | 91.09  |
| 615 | 2_WT.nd2 | 4 | 169 | 324338 | 16 | 91.66  |
| 616 | 2_WT.nd2 | 4 | 170 | 148772 | 7  | 93.21  |
| 617 | 2_WT.nd2 | 4 | 171 | 88182  | 4  | 81.61  |

|     |          |   |     |        |    |        |
|-----|----------|---|-----|--------|----|--------|
| 618 | 2_WT.nd2 | 4 | 172 | 130470 | 6  | 95.34  |
| 619 | 2_WT.nd2 | 4 | 173 | 52239  | 3  | 83.82  |
| 620 | 2_WT.nd2 | 4 | 174 | 51227  | 3  | 100.69 |
| 621 | 2_WT.nd2 | 4 | 175 | 46071  | 2  | 102.14 |
| 622 | 2_WT.nd2 | 4 | 176 | 76138  | 4  | 6.4    |
| 623 | 2_WT.nd2 | 4 | 177 | 22027  | 1  | 80.53  |
| 624 | 2_WT.nd2 | 4 | 178 | 19786  | 1  | 76.55  |
| 625 | 2_WT.nd2 | 4 | 179 | 107570 | 5  | 101.79 |
| 626 | 2_WT.nd2 | 4 | 180 | 98559  | 5  | 104.05 |
| 627 | 2_WT.nd2 | 4 | 181 | 57130  | 3  | 105.95 |
| 628 | 2_WT.nd2 | 4 | 182 | 193381 | 10 | 98.49  |
| 629 | 2_WT.nd2 | 4 | 183 | 36388  | 2  | 84.31  |
| 630 | 2_WT.nd2 | 4 | 184 | 25809  | 1  | 66.07  |
| 631 | 2_WT.nd2 | 4 | 185 | 91959  | 5  | 104.2  |
| 632 | 2_WT.nd2 | 4 | 186 | 40050  | 2  | 90.82  |
| 633 | 2_WT.nd2 | 4 | 187 | 135459 | 7  | 112.93 |
| 634 | 2_WT.nd2 | 4 | 188 | 19677  | 1  | 57.01  |
| 635 | 2_WT.nd2 | 4 | 189 | 60001  | 3  | 108.72 |
| 636 | 2_WT.nd2 | 4 | 190 | 34023  | 2  | 95.51  |
| 637 | 2_WT.nd2 | 4 | 191 | 57064  | 3  | 114.4  |
| 638 | 2_WT.nd2 | 4 | 192 | 19471  | 1  | 42.01  |
| 639 | 2_WT.nd2 | 4 | 193 | 21638  | 1  | 82.73  |
| 640 | 2_WT.nd2 | 4 | 194 | 90664  | 5  | 120.42 |
| 641 | 2_WT.nd2 | 4 | 195 | 20592  | 1  | 30.61  |
| 642 | 2_WT.nd2 | 4 | 196 | 122278 | 6  | 112.27 |
| 643 | 2_WT.nd2 | 4 | 197 | 47415  | 2  | 116.78 |
| 644 | 2_WT.nd2 | 4 | 198 | 67827  | 3  | 17.26  |
| 645 | 2_WT.nd2 | 4 | 199 | 30238  | 2  | 135.21 |
| 646 | 2_WT.nd2 | 4 | 200 | 21312  | 1  | 115.73 |
| 647 | 2_WT.nd2 | 4 | 201 | 35414  | 2  | 29.53  |
| 648 | 2_WT.nd2 | 4 | 202 | 22381  | 1  | 27.46  |
| 649 | 2_WT.nd2 | 4 | 203 | 22826  | 1  | 13.6   |
| 650 | 2_WT.nd2 | 4 | 204 | 24517  | 1  | 20.59  |
| 651 | 2_WT.nd2 | 4 | 205 | 23908  | 1  | 41.23  |
| 652 | 2_WT.nd2 | 4 | 206 | 20148  | 1  | 133.15 |
| 653 | 2_WT.nd2 | 4 | 207 | 20869  | 1  | 43.32  |
| 654 | 2_WT.nd2 | 4 | 208 | 21199  | 1  | 46.39  |
| 655 | 2_WT.nd2 | 4 | 209 | 23406  | 1  | 102.83 |
| 656 | 2_WT.nd2 | 4 | 210 | 16965  | 1  | 56.73  |
| 657 | 2_WT.nd2 | 4 | 211 | 18550  | 1  | 75.96  |
| 658 | 2_WT.nd2 | 4 | 212 | 19795  | 1  | 147.32 |
| 659 | 2_WT.nd2 | 4 | 213 | 17655  | 1  | 121.83 |
| 660 | 2_WT.nd2 | 4 | 214 | 18609  | 1  | 135.42 |

|     |          |   |     |        |   |        |
|-----|----------|---|-----|--------|---|--------|
| 661 | 2_WT.nd2 | 4 | 215 | 18147  | 1 | 99.32  |
| 662 | 2_WT.nd2 | 4 | 216 | 18229  | 1 | 191.55 |
| 663 | 2_WT.nd2 | 4 | 217 | 18603  | 1 | 222.01 |
| 664 | 2_WT.nd2 | 5 | 1   | 19109  | 1 | 114.11 |
| 665 | 2_WT.nd2 | 5 | 2   | 16760  | 1 | 27.2   |
| 666 | 2_WT.nd2 | 5 | 3   | 16741  | 1 | 131.53 |
| 667 | 2_WT.nd2 | 5 | 4   | 46180  | 2 | 121.41 |
| 668 | 2_WT.nd2 | 5 | 5   | 57240  | 3 | 11.66  |
| 669 | 2_WT.nd2 | 5 | 6   | 18523  | 1 | 17.03  |
| 670 | 2_WT.nd2 | 5 | 7   | 16589  | 1 | 15     |
| 671 | 2_WT.nd2 | 5 | 8   | 20182  | 1 | 18.25  |
| 672 | 2_WT.nd2 | 5 | 9   | 161382 | 8 | 13.6   |
| 673 | 2_WT.nd2 | 5 | 10  | 18653  | 1 | 27.66  |
| 674 | 2_WT.nd2 | 5 | 11  | 18361  | 1 | 33.94  |
| 675 | 2_WT.nd2 | 5 | 12  | 22137  | 1 | 43.14  |
| 676 | 2_WT.nd2 | 5 | 13  | 17573  | 1 | 47.51  |
| 677 | 2_WT.nd2 | 5 | 14  | 25000  | 1 | 53.85  |
| 678 | 2_WT.nd2 | 5 | 15  | 27824  | 1 | 63.03  |
| 679 | 2_WT.nd2 | 5 | 16  | 65365  | 3 | 52.33  |
| 680 | 2_WT.nd2 | 5 | 17  | 21739  | 1 | 72.18  |
| 681 | 2_WT.nd2 | 5 | 18  | 23219  | 1 | 77.79  |
| 682 | 2_WT.nd2 | 5 | 19  | 20779  | 1 | 112.81 |
| 683 | 2_WT.nd2 | 5 | 20  | 20525  | 1 | 87.68  |
| 684 | 2_WT.nd2 | 5 | 21  | 19518  | 1 | 84.4   |
| 685 | 2_WT.nd2 | 5 | 22  | 18615  | 1 | 42.54  |
| 686 | 2_WT.nd2 | 5 | 23  | 18526  | 1 | 108.52 |
| 687 | 2_WT.nd2 | 5 | 24  | 34223  | 2 | 46.62  |
| 688 | 2_WT.nd2 | 5 | 25  | 41920  | 2 | 35.47  |
| 689 | 2_WT.nd2 | 5 | 26  | 29201  | 1 | 32.53  |
| 690 | 2_WT.nd2 | 5 | 27  | 24031  | 1 | 36.4   |
| 691 | 2_WT.nd2 | 5 | 28  | 19851  | 1 | 71.78  |
| 692 | 2_WT.nd2 | 5 | 29  | 53581  | 3 | 26.91  |
| 693 | 2_WT.nd2 | 5 | 30  | 20773  | 1 | 24.76  |
| 694 | 2_WT.nd2 | 5 | 31  | 30589  | 2 | 18.44  |
| 695 | 2_WT.nd2 | 5 | 32  | 20506  | 1 | 14.87  |
| 696 | 2_WT.nd2 | 5 | 33  | 52551  | 3 | 8.06   |
| 697 | 2_WT.nd2 | 5 | 34  | 20481  | 1 | 3.61   |
| 698 | 2_WT.nd2 | 5 | 35  | 17938  | 1 | 0      |
| 699 | 2_WT.nd2 | 5 | 36  | 37594  | 2 | 7.21   |
| 700 | 2_WT.nd2 | 5 | 37  | 18468  | 1 | 23.09  |
| 701 | 2_WT.nd2 | 5 | 38  | 19291  | 1 | 94.58  |
| 702 | 2_WT.nd2 | 5 | 39  | 29058  | 1 | 20.52  |
| 703 | 2_WT.nd2 | 5 | 40  | 19989  | 1 | 33.24  |

|     |          |   |    |        |    |       |
|-----|----------|---|----|--------|----|-------|
| 704 | 2_WT.nd2 | 5 | 41 | 20787  | 1  | 28.43 |
| 705 | 2_WT.nd2 | 5 | 42 | 360525 | 18 | 36.77 |
| 706 | 2_WT.nd2 | 5 | 43 | 28458  | 1  | 29.73 |
| 707 | 2_WT.nd2 | 5 | 44 | 25466  | 1  | 27.31 |
| 708 | 2_WT.nd2 | 5 | 45 | 30378  | 2  | 24.74 |
| 709 | 2_WT.nd2 | 5 | 46 | 40650  | 2  | 20.59 |
| 710 | 2_WT.nd2 | 5 | 47 | 23473  | 1  | 16.76 |
| 711 | 2_WT.nd2 | 5 | 48 | 19365  | 1  | 49.65 |
| 712 | 2_WT.nd2 | 5 | 49 | 250122 | 12 | 14.21 |
| 713 | 2_WT.nd2 | 5 | 50 | 17792  | 1  | 34.01 |
| 714 | 2_WT.nd2 | 5 | 51 | 64077  | 3  | 0     |
| 715 | 2_WT.nd2 | 5 | 52 | 22925  | 1  | 25.63 |
| 716 | 2_WT.nd2 | 5 | 53 | 20370  | 1  | 10.44 |
| 717 | 2_WT.nd2 | 5 | 54 | 21035  | 1  | 11.4  |
| 718 | 2_WT.nd2 | 5 | 55 | 30957  | 2  | 6.4   |
| 719 | 2_WT.nd2 | 5 | 56 | 20677  | 1  | 30.41 |
| 720 | 2_WT.nd2 | 5 | 57 | 56957  | 3  | 8     |
| 721 | 2_WT.nd2 | 5 | 58 | 17336  | 1  | 91.18 |
| 722 | 2_WT.nd2 | 5 | 59 | 52900  | 3  | 9.9   |
| 723 | 2_WT.nd2 | 5 | 60 | 26744  | 1  | 7.07  |
| 724 | 2_WT.nd2 | 5 | 61 | 30111  | 1  | 42.38 |
| 725 | 2_WT.nd2 | 5 | 62 | 135482 | 7  | 21.93 |
| 726 | 2_WT.nd2 | 5 | 63 | 45155  | 2  | 26.93 |
| 727 | 2_WT.nd2 | 5 | 64 | 21609  | 1  | 46.24 |
| 728 | 2_WT.nd2 | 5 | 65 | 63389  | 3  | 53.49 |
| 729 | 2_WT.nd2 | 5 | 66 | 60019  | 3  | 22.02 |
| 730 | 2_WT.nd2 | 5 | 67 | 37149  | 2  | 59.46 |
| 731 | 2_WT.nd2 | 5 | 68 | 20493  | 1  | 72.01 |
| 732 | 2_WT.nd2 | 5 | 69 | 37797  | 2  | 63.91 |
| 733 | 2_WT.nd2 | 5 | 70 | 33962  | 2  | 68.62 |
| 734 | 2_WT.nd2 | 5 | 71 | 117622 | 6  | 22.85 |
| 735 | 2_WT.nd2 | 5 | 72 | 44006  | 2  | 56.46 |
| 736 | 2_WT.nd2 | 5 | 73 | 24065  | 1  | 31.32 |
| 737 | 2_WT.nd2 | 5 | 74 | 36166  | 2  | 66.94 |
| 738 | 2_WT.nd2 | 5 | 75 | 20463  | 1  | 42    |
| 739 | 2_WT.nd2 | 5 | 76 | 19582  | 1  | 73.93 |
| 740 | 2_WT.nd2 | 5 | 77 | 19611  | 1  | 54.13 |
| 741 | 2_WT.nd2 | 5 | 78 | 19513  | 1  | 32    |
| 742 | 2_WT.nd2 | 5 | 79 | 73664  | 4  | 17.12 |
| 743 | 2_WT.nd2 | 5 | 80 | 28502  | 1  | 14    |
| 744 | 2_WT.nd2 | 5 | 81 | 19130  | 1  | 26    |
| 745 | 2_WT.nd2 | 5 | 82 | 22071  | 1  | 13.15 |
| 746 | 2_WT.nd2 | 5 | 83 | 19321  | 1  | 60.44 |

|     |          |   |     |        |   |        |
|-----|----------|---|-----|--------|---|--------|
| 747 | 2_WT.nd2 | 5 | 84  | 70584  | 4 | 8.06   |
| 748 | 2_WT.nd2 | 5 | 85  | 53666  | 3 | 8.25   |
| 749 | 2_WT.nd2 | 5 | 86  | 23241  | 1 | 11.4   |
| 750 | 2_WT.nd2 | 5 | 87  | 22430  | 1 | 2      |
| 751 | 2_WT.nd2 | 5 | 88  | 22155  | 1 | 47     |
| 752 | 2_WT.nd2 | 5 | 89  | 42832  | 2 | 18.03  |
| 753 | 2_WT.nd2 | 5 | 90  | 77923  | 4 | 20.1   |
| 754 | 2_WT.nd2 | 5 | 91  | 24804  | 1 | 61.98  |
| 755 | 2_WT.nd2 | 5 | 92  | 20051  | 1 | 7      |
| 756 | 2_WT.nd2 | 5 | 93  | 21170  | 1 | 11.18  |
| 757 | 2_WT.nd2 | 5 | 94  | 19081  | 1 | 1      |
| 758 | 2_WT.nd2 | 5 | 95  | 19425  | 1 | 73.35  |
| 759 | 2_WT.nd2 | 5 | 96  | 19779  | 1 | 14     |
| 760 | 2_WT.nd2 | 5 | 97  | 20126  | 1 | 15.81  |
| 761 | 2_WT.nd2 | 5 | 98  | 17129  | 1 | 116.02 |
| 762 | 2_WT.nd2 | 5 | 99  | 28247  | 1 | 64.78  |
| 763 | 2_WT.nd2 | 5 | 100 | 15077  | 1 | 61.81  |
| 764 | 2_WT.nd2 | 5 | 101 | 17907  | 1 | 36.01  |
| 765 | 2_WT.nd2 | 5 | 102 | 16230  | 1 | 118.68 |
| 766 | 2_WT.nd2 | 5 | 103 | 28650  | 1 | 50.61  |
| 767 | 2_WT.nd2 | 5 | 104 | 28852  | 1 | 48.51  |
| 768 | 2_WT.nd2 | 5 | 105 | 22977  | 1 | 110.22 |
| 769 | 2_WT.nd2 | 5 | 106 | 20244  | 1 | 57.25  |
| 770 | 2_WT.nd2 | 5 | 107 | 23114  | 1 | 39.56  |
| 771 | 2_WT.nd2 | 5 | 108 | 27463  | 1 | 92.36  |
| 772 | 2_WT.nd2 | 5 | 109 | 46515  | 2 | 63.01  |
| 773 | 2_WT.nd2 | 5 | 110 | 28137  | 1 | 26.17  |
| 774 | 2_WT.nd2 | 5 | 111 | 30860  | 2 | 35     |
| 775 | 2_WT.nd2 | 5 | 112 | 23610  | 1 | 34.71  |
| 776 | 2_WT.nd2 | 5 | 113 | 19229  | 1 | 63.6   |
| 777 | 2_WT.nd2 | 5 | 114 | 35254  | 2 | 129.24 |
| 778 | 2_WT.nd2 | 5 | 115 | 54375  | 3 | 31.06  |
| 779 | 2_WT.nd2 | 5 | 116 | 122324 | 6 | 114.48 |
| 780 | 2_WT.nd2 | 5 | 117 | 30681  | 2 | 127.24 |
| 781 | 2_WT.nd2 | 5 | 118 | 37586  | 2 | 36.24  |
| 782 | 2_WT.nd2 | 5 | 119 | 44108  | 2 | 47.8   |
| 783 | 2_WT.nd2 | 5 | 120 | 25410  | 1 | 35.74  |
| 784 | 2_WT.nd2 | 5 | 121 | 40027  | 2 | 32.31  |
| 785 | 2_WT.nd2 | 5 | 122 | 30751  | 2 | 38.47  |
| 786 | 2_WT.nd2 | 5 | 123 | 50720  | 3 | 50     |
| 787 | 2_WT.nd2 | 5 | 124 | 19939  | 1 | 47.27  |
| 788 | 2_WT.nd2 | 5 | 125 | 24243  | 1 | 8.06   |
| 789 | 2_WT.nd2 | 5 | 126 | 41843  | 2 | 59.46  |

|     |          |   |     |        |    |        |
|-----|----------|---|-----|--------|----|--------|
| 790 | 2_WT.nd2 | 5 | 127 | 21961  | 1  | 73.05  |
| 791 | 2_WT.nd2 | 5 | 128 | 38340  | 2  | 63.51  |
| 792 | 2_WT.nd2 | 5 | 129 | 72136  | 4  | 62.77  |
| 793 | 2_WT.nd2 | 5 | 130 | 32926  | 2  | 73.25  |
| 794 | 2_WT.nd2 | 5 | 131 | 43553  | 2  | 72.25  |
| 795 | 2_WT.nd2 | 5 | 132 | 39393  | 2  | 78.39  |
| 796 | 2_WT.nd2 | 5 | 133 | 149294 | 7  | 71.56  |
| 797 | 2_WT.nd2 | 5 | 134 | 37173  | 2  | 73     |
| 798 | 2_WT.nd2 | 5 | 135 | 126678 | 6  | 70.33  |
| 799 | 2_WT.nd2 | 5 | 136 | 40918  | 2  | 53.08  |
| 800 | 2_WT.nd2 | 5 | 137 | 96474  | 5  | 109    |
| 801 | 2_WT.nd2 | 5 | 138 | 43442  | 2  | 67.23  |
| 802 | 2_WT.nd2 | 5 | 139 | 101336 | 5  | 68.88  |
| 803 | 2_WT.nd2 | 5 | 140 | 19966  | 1  | 130.7  |
| 804 | 2_WT.nd2 | 5 | 141 | 46836  | 2  | 76.24  |
| 805 | 2_WT.nd2 | 5 | 142 | 90121  | 4  | 78.49  |
| 806 | 2_WT.nd2 | 5 | 143 | 45391  | 2  | 79.91  |
| 807 | 2_WT.nd2 | 5 | 144 | 76210  | 4  | 84.2   |
| 808 | 2_WT.nd2 | 5 | 145 | 106021 | 5  | 100.42 |
| 809 | 2_WT.nd2 | 5 | 146 | 176636 | 9  | 103.95 |
| 810 | 2_WT.nd2 | 5 | 147 | 39185  | 2  | 127.88 |
| 811 | 2_WT.nd2 | 5 | 148 | 39682  | 2  | 95.19  |
| 812 | 2_WT.nd2 | 5 | 149 | 110311 | 5  | 88.09  |
| 813 | 2_WT.nd2 | 5 | 150 | 25580  | 1  | 15     |
| 814 | 2_WT.nd2 | 5 | 151 | 91495  | 5  | 92.1   |
| 815 | 2_WT.nd2 | 5 | 152 | 53619  | 3  | 110.34 |
| 816 | 2_WT.nd2 | 5 | 153 | 25164  | 1  | 125.8  |
| 817 | 2_WT.nd2 | 5 | 154 | 23227  | 1  | 120.88 |
| 818 | 2_WT.nd2 | 5 | 155 | 19624  | 1  | 76.01  |
| 819 | 2_WT.nd2 | 5 | 156 | 24976  | 1  | 85.15  |
| 820 | 2_WT.nd2 | 5 | 157 | 202559 | 10 | 99.04  |
| 821 | 2_WT.nd2 | 5 | 158 | 24432  | 1  | 91.39  |
| 822 | 2_WT.nd2 | 5 | 159 | 142711 | 7  | 94.49  |
| 823 | 2_WT.nd2 | 5 | 160 | 19123  | 1  | 119.67 |
| 824 | 2_WT.nd2 | 5 | 161 | 44478  | 2  | 80.62  |
| 825 | 2_WT.nd2 | 5 | 162 | 102202 | 5  | 107.52 |
| 826 | 2_WT.nd2 | 5 | 163 | 141743 | 7  | 93.41  |
| 827 | 2_WT.nd2 | 5 | 164 | 177732 | 9  | 94.02  |
| 828 | 2_WT.nd2 | 5 | 165 | 21321  | 1  | 83.22  |
| 829 | 2_WT.nd2 | 5 | 166 | 43623  | 2  | 92.96  |
| 830 | 2_WT.nd2 | 5 | 167 | 25068  | 1  | 9.85   |
| 831 | 2_WT.nd2 | 5 | 168 | 18795  | 1  | 94.18  |
| 832 | 2_WT.nd2 | 5 | 169 | 35829  | 2  | 86.45  |

|     |          |   |     |        |   |        |
|-----|----------|---|-----|--------|---|--------|
| 833 | 2_WT.nd2 | 5 | 170 | 17949  | 1 | 105.68 |
| 834 | 2_WT.nd2 | 5 | 171 | 54398  | 3 | 69.64  |
| 835 | 2_WT.nd2 | 5 | 172 | 85682  | 4 | 112.16 |
| 836 | 2_WT.nd2 | 5 | 173 | 26917  | 1 | 116.85 |
| 837 | 2_WT.nd2 | 5 | 174 | 19685  | 1 | 47.52  |
| 838 | 2_WT.nd2 | 5 | 175 | 39412  | 2 | 137.41 |
| 839 | 2_WT.nd2 | 5 | 176 | 19714  | 1 | 46.1   |
| 840 | 2_WT.nd2 | 5 | 177 | 20692  | 1 | 79.63  |
| 841 | 2_WT.nd2 | 5 | 178 | 22035  | 1 | 59.46  |
| 842 | 2_WT.nd2 | 5 | 179 | 18115  | 1 | 119.01 |
| 843 | 2_WT.nd2 | 5 | 180 | 21089  | 1 | 95.63  |
| 844 | 2_WT.nd2 | 5 | 181 | 21955  | 1 | 35.36  |
| 845 | 2_WT.nd2 | 5 | 182 | 15870  | 1 | 151.17 |
| 846 | 2_WT.nd2 | 5 | 183 | 21054  | 1 | 25.81  |
| 847 | 2_WT.nd2 | 5 | 184 | 20104  | 1 | 41.01  |
| 848 | 2_WT.nd2 | 5 | 185 | 21823  | 1 | 52.01  |
| 849 | 2_WT.nd2 | 5 | 186 | 38021  | 2 | 60.8   |
| 850 | 2_WT.nd2 | 5 | 187 | 20015  | 1 | 148.27 |
| 851 | 2_WT.nd2 | 5 | 188 | 20130  | 1 | 153.05 |
| 852 | 2_WT.nd2 | 5 | 189 | 27199  | 1 | 66.4   |
| 853 | 2_WT.nd2 | 5 | 190 | 20119  | 1 | 75.24  |
| 854 | 2_WT.nd2 | 5 | 191 | 18003  | 1 | 128.39 |
| 855 | 2_WT.nd2 | 6 | 1   | 15985  | 1 | 101.02 |
| 856 | 2_WT.nd2 | 6 | 2   | 22631  | 1 | 21.54  |
| 857 | 2_WT.nd2 | 6 | 3   | 22764  | 1 | 15.81  |
| 858 | 2_WT.nd2 | 6 | 4   | 22371  | 1 | 13.45  |
| 859 | 2_WT.nd2 | 6 | 5   | 25621  | 1 | 15.65  |
| 860 | 2_WT.nd2 | 6 | 6   | 18765  | 1 | 22.09  |
| 861 | 2_WT.nd2 | 6 | 7   | 53154  | 3 | 9.43   |
| 862 | 2_WT.nd2 | 6 | 8   | 70089  | 3 | 5      |
| 863 | 2_WT.nd2 | 6 | 9   | 46870  | 2 | 1      |
| 864 | 2_WT.nd2 | 6 | 10  | 97860  | 5 | 1      |
| 865 | 2_WT.nd2 | 6 | 11  | 18918  | 1 | 14     |
| 866 | 2_WT.nd2 | 6 | 12  | 17066  | 1 | 19.1   |
| 867 | 2_WT.nd2 | 6 | 13  | 117819 | 6 | 4.24   |
| 868 | 2_WT.nd2 | 6 | 14  | 19272  | 1 | 20.22  |
| 869 | 2_WT.nd2 | 6 | 15  | 19381  | 1 | 24.19  |
| 870 | 2_WT.nd2 | 6 | 16  | 20821  | 1 | 44.29  |
| 871 | 2_WT.nd2 | 6 | 17  | 19820  | 1 | 24.02  |
| 872 | 2_WT.nd2 | 6 | 18  | 20396  | 1 | 83.1   |
| 873 | 2_WT.nd2 | 6 | 19  | 33532  | 2 | 20.62  |
| 874 | 2_WT.nd2 | 6 | 20  | 21822  | 1 | 14.87  |
| 875 | 2_WT.nd2 | 6 | 21  | 18329  | 1 | 7      |

|     |          |   |    |        |    |       |
|-----|----------|---|----|--------|----|-------|
| 876 | 2_WT.nd2 | 6 | 22 | 19514  | 1  | 36.67 |
| 877 | 2_WT.nd2 | 6 | 23 | 25721  | 1  | 33.24 |
| 878 | 2_WT.nd2 | 6 | 24 | 28109  | 1  | 25.81 |
| 879 | 2_WT.nd2 | 6 | 25 | 21855  | 1  | 41.19 |
| 880 | 2_WT.nd2 | 6 | 26 | 25767  | 1  | 3.16  |
| 881 | 2_WT.nd2 | 6 | 27 | 20227  | 1  | 15.03 |
| 882 | 2_WT.nd2 | 6 | 28 | 31358  | 2  | 3.16  |
| 883 | 2_WT.nd2 | 6 | 29 | 46363  | 2  | 7.07  |
| 884 | 2_WT.nd2 | 6 | 30 | 21194  | 1  | 18.11 |
| 885 | 2_WT.nd2 | 6 | 31 | 17025  | 1  | 15.3  |
| 886 | 2_WT.nd2 | 6 | 32 | 64640  | 3  | 15.26 |
| 887 | 2_WT.nd2 | 6 | 33 | 143897 | 7  | 19    |
| 888 | 2_WT.nd2 | 6 | 34 | 17960  | 1  | 80.11 |
| 889 | 2_WT.nd2 | 6 | 35 | 40598  | 2  | 4.24  |
| 890 | 2_WT.nd2 | 6 | 36 | 67776  | 3  | 22    |
| 891 | 2_WT.nd2 | 6 | 37 | 82678  | 4  | 18    |
| 892 | 2_WT.nd2 | 6 | 38 | 37671  | 2  | 5     |
| 893 | 2_WT.nd2 | 6 | 39 | 106187 | 5  | 17.72 |
| 894 | 2_WT.nd2 | 6 | 40 | 24671  | 1  | 34.01 |
| 895 | 2_WT.nd2 | 6 | 41 | 111451 | 6  | 17.12 |
| 896 | 2_WT.nd2 | 6 | 42 | 47393  | 2  | 6.32  |
| 897 | 2_WT.nd2 | 6 | 43 | 125002 | 6  | 18.03 |
| 898 | 2_WT.nd2 | 6 | 44 | 50540  | 3  | 12.73 |
| 899 | 2_WT.nd2 | 6 | 45 | 201565 | 10 | 21.1  |
| 900 | 2_WT.nd2 | 6 | 46 | 18096  | 1  | 39.82 |
| 901 | 2_WT.nd2 | 6 | 47 | 34639  | 2  | 24.08 |
| 902 | 2_WT.nd2 | 6 | 48 | 130836 | 7  | 26.17 |
| 903 | 2_WT.nd2 | 6 | 49 | 19038  | 1  | 25.81 |
| 904 | 2_WT.nd2 | 6 | 50 | 30681  | 2  | 36.4  |
| 905 | 2_WT.nd2 | 6 | 51 | 49423  | 2  | 41.04 |
| 906 | 2_WT.nd2 | 6 | 52 | 67998  | 3  | 32.8  |
| 907 | 2_WT.nd2 | 6 | 53 | 20148  | 1  | 28.84 |
| 908 | 2_WT.nd2 | 6 | 54 | 49249  | 2  | 39.41 |
| 909 | 2_WT.nd2 | 6 | 55 | 48833  | 2  | 44.94 |
| 910 | 2_WT.nd2 | 6 | 56 | 31373  | 2  | 50.25 |
| 911 | 2_WT.nd2 | 6 | 57 | 39511  | 2  | 43.05 |
| 912 | 2_WT.nd2 | 6 | 58 | 20284  | 1  | 57.28 |
| 913 | 2_WT.nd2 | 6 | 59 | 27258  | 1  | 46.1  |
| 914 | 2_WT.nd2 | 6 | 60 | 18419  | 1  | 48.55 |
| 915 | 2_WT.nd2 | 6 | 61 | 19096  | 1  | 37.54 |
| 916 | 2_WT.nd2 | 6 | 62 | 21100  | 1  | 53.74 |
| 917 | 2_WT.nd2 | 6 | 63 | 19873  | 1  | 60.22 |
| 918 | 2_WT.nd2 | 6 | 64 | 19807  | 1  | 47.17 |



|     |          |   |     |       |   |        |
|-----|----------|---|-----|-------|---|--------|
| 919 | 2_WT.nd2 | 6 | 65  | 21090 | 1 | 66.19  |
| 920 | 2_WT.nd2 | 6 | 66  | 18852 | 1 | 40     |
| 921 | 2_WT.nd2 | 6 | 67  | 22719 | 1 | 76.94  |
| 922 | 2_WT.nd2 | 6 | 68  | 19741 | 1 | 50.01  |
| 923 | 2_WT.nd2 | 6 | 69  | 21851 | 1 | 32.65  |
| 924 | 2_WT.nd2 | 6 | 70  | 21788 | 1 | 57.43  |
| 925 | 2_WT.nd2 | 6 | 71  | 22545 | 1 | 38.08  |
| 926 | 2_WT.nd2 | 6 | 72  | 20155 | 1 | 36.77  |
| 927 | 2_WT.nd2 | 6 | 73  | 21048 | 1 | 40.5   |
| 928 | 2_WT.nd2 | 6 | 74  | 41512 | 2 | 60.11  |
| 929 | 2_WT.nd2 | 6 | 75  | 78054 | 4 | 53.91  |
| 930 | 2_WT.nd2 | 6 | 76  | 22030 | 1 | 45.62  |
| 931 | 2_WT.nd2 | 6 | 77  | 19882 | 1 | 50.54  |
| 932 | 2_WT.nd2 | 6 | 78  | 38234 | 2 | 61.72  |
| 933 | 2_WT.nd2 | 6 | 79  | 24099 | 1 | 56.61  |
| 934 | 2_WT.nd2 | 6 | 80  | 17417 | 1 | 50.7   |
| 935 | 2_WT.nd2 | 6 | 81  | 72942 | 4 | 65.6   |
| 936 | 2_WT.nd2 | 6 | 82  | 32835 | 2 | 61.59  |
| 937 | 2_WT.nd2 | 6 | 83  | 21461 | 1 | 5      |
| 938 | 2_WT.nd2 | 6 | 84  | 29680 | 1 | 65.22  |
| 939 | 2_WT.nd2 | 6 | 85  | 20699 | 1 | 37.12  |
| 940 | 2_WT.nd2 | 6 | 86  | 35094 | 2 | 0      |
| 941 | 2_WT.nd2 | 6 | 87  | 19797 | 1 | 34.18  |
| 942 | 2_WT.nd2 | 6 | 88  | 22346 | 1 | 23.77  |
| 943 | 2_WT.nd2 | 6 | 89  | 19226 | 1 | 14.32  |
| 944 | 2_WT.nd2 | 6 | 90  | 34877 | 2 | 70.18  |
| 945 | 2_WT.nd2 | 6 | 91  | 19110 | 1 | 29.02  |
| 946 | 2_WT.nd2 | 6 | 92  | 74524 | 4 | 18     |
| 947 | 2_WT.nd2 | 6 | 93  | 23940 | 1 | 29     |
| 948 | 2_WT.nd2 | 6 | 94  | 20947 | 1 | 75     |
| 949 | 2_WT.nd2 | 6 | 95  | 27195 | 1 | 14     |
| 950 | 2_WT.nd2 | 6 | 96  | 39676 | 2 | 80.01  |
| 951 | 2_WT.nd2 | 6 | 97  | 29060 | 1 | 13     |
| 952 | 2_WT.nd2 | 6 | 98  | 43691 | 2 | 8.06   |
| 953 | 2_WT.nd2 | 6 | 99  | 29152 | 1 | 97.53  |
| 954 | 2_WT.nd2 | 6 | 100 | 18420 | 1 | 65.15  |
| 955 | 2_WT.nd2 | 6 | 101 | 86167 | 4 | 12.65  |
| 956 | 2_WT.nd2 | 6 | 102 | 34939 | 2 | 14.14  |
| 957 | 2_WT.nd2 | 6 | 103 | 39363 | 2 | 17.72  |
| 958 | 2_WT.nd2 | 6 | 104 | 21696 | 1 | 112.79 |
| 959 | 2_WT.nd2 | 6 | 105 | 36872 | 2 | 24     |
| 960 | 2_WT.nd2 | 6 | 106 | 20915 | 1 | 40.31  |
| 961 | 2_WT.nd2 | 6 | 107 | 20555 | 1 | 32.25  |

|      |          |   |     |        |   |        |
|------|----------|---|-----|--------|---|--------|
| 962  | 2_WT.nd2 | 6 | 108 | 22548  | 1 | 123.76 |
| 963  | 2_WT.nd2 | 6 | 109 | 32120  | 2 | 34     |
| 964  | 2_WT.nd2 | 6 | 110 | 59688  | 3 | 40     |
| 965  | 2_WT.nd2 | 6 | 111 | 28488  | 1 | 12.37  |
| 966  | 2_WT.nd2 | 6 | 112 | 36459  | 2 | 73.54  |
| 967  | 2_WT.nd2 | 6 | 113 | 28510  | 1 | 151.82 |
| 968  | 2_WT.nd2 | 6 | 114 | 16729  | 1 | 120.95 |
| 969  | 2_WT.nd2 | 6 | 115 | 21255  | 1 | 152.59 |
| 970  | 2_WT.nd2 | 6 | 116 | 101424 | 5 | 160.08 |
| 971  | 2_WT.nd2 | 6 | 117 | 105123 | 5 | 172.7  |
| 972  | 2_WT.nd2 | 6 | 118 | 22046  | 1 | 70.8   |
| 973  | 2_WT.nd2 | 6 | 119 | 20225  | 1 | 48     |
| 974  | 2_WT.nd2 | 6 | 120 | 21708  | 1 | 31.76  |
| 975  | 2_WT.nd2 | 6 | 121 | 25724  | 1 | 57.58  |
| 976  | 2_WT.nd2 | 6 | 122 | 34219  | 2 | 26.4   |
| 977  | 2_WT.nd2 | 6 | 123 | 73196  | 4 | 24.08  |
| 978  | 2_WT.nd2 | 6 | 124 | 31187  | 2 | 180.45 |
| 979  | 2_WT.nd2 | 6 | 125 | 45428  | 2 | 21.95  |
| 980  | 2_WT.nd2 | 6 | 126 | 33181  | 2 | 18.03  |
| 981  | 2_WT.nd2 | 6 | 127 | 42200  | 2 | 20     |
| 982  | 2_WT.nd2 | 6 | 128 | 44259  | 2 | 27.46  |
| 983  | 2_WT.nd2 | 6 | 129 | 43270  | 2 | 189.71 |
| 984  | 2_WT.nd2 | 6 | 130 | 19476  | 1 | 56.59  |
| 985  | 2_WT.nd2 | 6 | 131 | 23847  | 1 | 57.98  |
| 986  | 2_WT.nd2 | 6 | 132 | 43729  | 2 | 200.25 |
| 987  | 2_WT.nd2 | 6 | 133 | 80603  | 4 | 116.81 |
| 988  | 2_WT.nd2 | 6 | 134 | 20966  | 1 | 67.23  |
| 989  | 2_WT.nd2 | 6 | 135 | 20179  | 1 | 39.96  |
| 990  | 2_WT.nd2 | 6 | 136 | 20420  | 1 | 107.3  |
| 991  | 2_WT.nd2 | 6 | 137 | 20400  | 1 | 95     |
| 992  | 2_WT.nd2 | 6 | 138 | 19429  | 1 | 109.02 |
| 993  | 2_WT.nd2 | 6 | 139 | 20786  | 1 | 49.01  |
| 994  | 2_WT.nd2 | 6 | 140 | 20355  | 1 | 40.2   |
| 995  | 2_WT.nd2 | 6 | 141 | 19295  | 1 | 108.12 |
| 996  | 2_WT.nd2 | 6 | 142 | 33494  | 2 | 136.8  |
| 997  | 2_WT.nd2 | 6 | 143 | 21730  | 1 | 29.41  |
| 998  | 2_WT.nd2 | 6 | 144 | 49399  | 2 | 14.76  |
| 999  | 2_WT.nd2 | 6 | 145 | 20954  | 1 | 15.3   |
| 1000 | 2_WT.nd2 | 6 | 146 | 88117  | 4 | 15.13  |
| 1001 | 2_WT.nd2 | 6 | 147 | 67652  | 3 | 19.7   |
| 1002 | 2_WT.nd2 | 6 | 148 | 55162  | 3 | 24.84  |
| 1003 | 2_WT.nd2 | 6 | 149 | 87035  | 4 | 30.41  |
| 1004 | 2_WT.nd2 | 6 | 150 | 19971  | 1 | 23.54  |

|      |          |   |     |        |   |       |
|------|----------|---|-----|--------|---|-------|
| 1005 | 2_WT.nd2 | 6 | 151 | 22151  | 1 | 82.76 |
| 1006 | 2_WT.nd2 | 6 | 152 | 66364  | 3 | 34.21 |
| 1007 | 2_WT.nd2 | 6 | 153 | 21238  | 1 | 43.84 |
| 1008 | 2_WT.nd2 | 7 | 1   | 16623  | 1 | 39.12 |
| 1009 | 2_WT.nd2 | 7 | 2   | 19009  | 1 | 42.72 |
| 1010 | 2_WT.nd2 | 7 | 3   | 17278  | 1 | 14.04 |
| 1011 | 2_WT.nd2 | 7 | 4   | 16512  | 1 | 49.09 |
| 1012 | 2_WT.nd2 | 7 | 5   | 20010  | 1 | 41.23 |
| 1013 | 2_WT.nd2 | 7 | 6   | 18495  | 1 | 40.85 |
| 1014 | 2_WT.nd2 | 7 | 7   | 45410  | 2 | 35.51 |
| 1015 | 2_WT.nd2 | 7 | 8   | 18709  | 1 | 24.17 |
| 1016 | 2_WT.nd2 | 7 | 9   | 18100  | 1 | 18.44 |
| 1017 | 2_WT.nd2 | 7 | 10  | 19935  | 1 | 20.62 |
| 1018 | 2_WT.nd2 | 7 | 11  | 22261  | 1 | 23.71 |
| 1019 | 2_WT.nd2 | 7 | 12  | 18888  | 1 | 8.49  |
| 1020 | 2_WT.nd2 | 7 | 13  | 24011  | 1 | 46.04 |
| 1021 | 2_WT.nd2 | 7 | 14  | 21744  | 1 | 41.15 |
| 1022 | 2_WT.nd2 | 7 | 15  | 32081  | 2 | 23.41 |
| 1023 | 2_WT.nd2 | 7 | 16  | 99335  | 5 | 45.34 |
| 1024 | 2_WT.nd2 | 7 | 17  | 30875  | 2 | 36.4  |
| 1025 | 2_WT.nd2 | 7 | 18  | 18805  | 1 | 44.01 |
| 1026 | 2_WT.nd2 | 7 | 19  | 21703  | 1 | 27.07 |
| 1027 | 2_WT.nd2 | 7 | 20  | 21539  | 1 | 33.62 |
| 1028 | 2_WT.nd2 | 7 | 21  | 21373  | 1 | 34.89 |
| 1029 | 2_WT.nd2 | 7 | 22  | 77106  | 4 | 22.47 |
| 1030 | 2_WT.nd2 | 7 | 23  | 23464  | 1 | 13.45 |
| 1031 | 2_WT.nd2 | 7 | 24  | 21695  | 1 | 25    |
| 1032 | 2_WT.nd2 | 7 | 25  | 123451 | 6 | 25.61 |
| 1033 | 2_WT.nd2 | 7 | 26  | 28097  | 1 | 30.07 |
| 1034 | 2_WT.nd2 | 7 | 27  | 22718  | 1 | 38.28 |
| 1035 | 2_WT.nd2 | 7 | 28  | 43547  | 2 | 17    |
| 1036 | 2_WT.nd2 | 7 | 29  | 20567  | 1 | 29.7  |
| 1037 | 2_WT.nd2 | 7 | 30  | 47817  | 2 | 19.85 |
| 1038 | 2_WT.nd2 | 7 | 31  | 33136  | 2 | 36.24 |
| 1039 | 2_WT.nd2 | 7 | 32  | 23528  | 1 | 27.78 |
| 1040 | 2_WT.nd2 | 7 | 33  | 37850  | 2 | 15    |
| 1041 | 2_WT.nd2 | 7 | 34  | 59486  | 3 | 27.2  |
| 1042 | 2_WT.nd2 | 7 | 35  | 37181  | 2 | 17.03 |
| 1043 | 2_WT.nd2 | 7 | 36  | 22735  | 1 | 59.08 |
| 1044 | 2_WT.nd2 | 7 | 37  | 27191  | 1 | 62.97 |
| 1045 | 2_WT.nd2 | 7 | 38  | 21003  | 1 | 36.24 |
| 1046 | 2_WT.nd2 | 7 | 39  | 30836  | 2 | 0     |
| 1047 | 2_WT.nd2 | 7 | 40  | 28210  | 1 | 14.56 |

|      |          |   |    |        |   |       |
|------|----------|---|----|--------|---|-------|
| 1048 | 2_WT.nd2 | 7 | 41 | 19929  | 1 | 10.3  |
| 1049 | 2_WT.nd2 | 7 | 42 | 19579  | 1 | 63.13 |
| 1050 | 2_WT.nd2 | 7 | 43 | 133087 | 7 | 33.14 |
| 1051 | 2_WT.nd2 | 7 | 44 | 19318  | 1 | 12.08 |
| 1052 | 2_WT.nd2 | 7 | 45 | 17207  | 1 | 7.07  |
| 1053 | 2_WT.nd2 | 7 | 46 | 27221  | 1 | 0     |
| 1054 | 2_WT.nd2 | 7 | 47 | 30575  | 2 | 0     |
| 1055 | 2_WT.nd2 | 7 | 48 | 44240  | 2 | 4.47  |
| 1056 | 2_WT.nd2 | 7 | 49 | 29584  | 1 | 7.81  |
| 1057 | 2_WT.nd2 | 7 | 50 | 23377  | 1 | 11.05 |
| 1058 | 2_WT.nd2 | 7 | 51 | 57989  | 3 | 57.97 |
| 1059 | 2_WT.nd2 | 7 | 52 | 24076  | 1 | 13.6  |
| 1060 | 2_WT.nd2 | 7 | 53 | 20021  | 1 | 80.23 |
| 1061 | 2_WT.nd2 | 7 | 54 | 25973  | 1 | 17    |
| 1062 | 2_WT.nd2 | 7 | 55 | 21006  | 1 | 1.41  |
| 1063 | 2_WT.nd2 | 7 | 56 | 24224  | 1 | 26.48 |
| 1064 | 2_WT.nd2 | 7 | 57 | 33065  | 2 | 0     |
| 1065 | 2_WT.nd2 | 7 | 58 | 20929  | 1 | 28    |
| 1066 | 2_WT.nd2 | 7 | 59 | 17949  | 1 | 65.31 |
| 1067 | 2_WT.nd2 | 7 | 60 | 25737  | 1 | 42.49 |
| 1068 | 2_WT.nd2 | 7 | 61 | 24005  | 1 | 41.79 |
| 1069 | 2_WT.nd2 | 7 | 62 | 20622  | 1 | 43.83 |
| 1070 | 2_WT.nd2 | 7 | 63 | 19585  | 1 | 68.1  |
| 1071 | 2_WT.nd2 | 7 | 64 | 18662  | 1 | 49.2  |
| 1072 | 2_WT.nd2 | 7 | 65 | 19110  | 1 | 39.2  |
| 1073 | 2_WT.nd2 | 7 | 66 | 21129  | 1 | 60.03 |
| 1074 | 2_WT.nd2 | 7 | 67 | 96067  | 5 | 28.79 |
| 1075 | 2_WT.nd2 | 7 | 68 | 25562  | 1 | 52.61 |
| 1076 | 2_WT.nd2 | 7 | 69 | 30452  | 2 | 48.66 |
| 1077 | 2_WT.nd2 | 7 | 70 | 21497  | 1 | 9.43  |
| 1078 | 2_WT.nd2 | 7 | 71 | 20156  | 1 | 44.91 |
| 1079 | 2_WT.nd2 | 7 | 72 | 29412  | 1 | 34.48 |
| 1080 | 2_WT.nd2 | 7 | 73 | 18256  | 1 | 40    |
| 1081 | 2_WT.nd2 | 7 | 74 | 60020  | 3 | 29.07 |
| 1082 | 2_WT.nd2 | 7 | 75 | 53457  | 3 | 25.24 |
| 1083 | 2_WT.nd2 | 7 | 76 | 34417  | 2 | 17.69 |
| 1084 | 2_WT.nd2 | 7 | 77 | 25398  | 1 | 23.43 |
| 1085 | 2_WT.nd2 | 7 | 78 | 18691  | 1 | 5.83  |
| 1086 | 2_WT.nd2 | 7 | 79 | 19221  | 1 | 25.94 |
| 1087 | 2_WT.nd2 | 7 | 80 | 22947  | 1 | 20.12 |
| 1088 | 2_WT.nd2 | 7 | 81 | 20929  | 1 | 71.11 |
| 1089 | 2_WT.nd2 | 7 | 82 | 115096 | 6 | 24.7  |
| 1090 | 2_WT.nd2 | 7 | 83 | 33594  | 2 | 21.84 |

|      |          |   |     |        |   |        |
|------|----------|---|-----|--------|---|--------|
| 1091 | 2_WT.nd2 | 7 | 84  | 41738  | 2 | 18.25  |
| 1092 | 2_WT.nd2 | 7 | 85  | 74636  | 4 | 15.3   |
| 1093 | 2_WT.nd2 | 7 | 86  | 148214 | 7 | 9.06   |
| 1094 | 2_WT.nd2 | 7 | 87  | 22286  | 1 | 79.83  |
| 1095 | 2_WT.nd2 | 7 | 88  | 142803 | 7 | 9      |
| 1096 | 2_WT.nd2 | 7 | 89  | 30787  | 2 | 11.18  |
| 1097 | 2_WT.nd2 | 7 | 90  | 19685  | 1 | 13.04  |
| 1098 | 2_WT.nd2 | 7 | 91  | 28361  | 1 | 81.93  |
| 1099 | 2_WT.nd2 | 7 | 92  | 18194  | 1 | 89.84  |
| 1100 | 2_WT.nd2 | 7 | 93  | 45941  | 2 | 7.62   |
| 1101 | 2_WT.nd2 | 7 | 94  | 74603  | 4 | 4.24   |
| 1102 | 2_WT.nd2 | 7 | 95  | 48187  | 2 | 4.12   |
| 1103 | 2_WT.nd2 | 7 | 96  | 153875 | 8 | 20.02  |
| 1104 | 2_WT.nd2 | 7 | 97  | 42601  | 2 | 52.5   |
| 1105 | 2_WT.nd2 | 7 | 98  | 154136 | 8 | 36     |
| 1106 | 2_WT.nd2 | 7 | 99  | 59096  | 3 | 14     |
| 1107 | 2_WT.nd2 | 7 | 100 | 28889  | 1 | 64.28  |
| 1108 | 2_WT.nd2 | 7 | 101 | 155943 | 8 | 31     |
| 1109 | 2_WT.nd2 | 7 | 102 | 168820 | 8 | 26     |
| 1110 | 2_WT.nd2 | 7 | 103 | 128527 | 6 | 19     |
| 1111 | 2_WT.nd2 | 7 | 104 | 54706  | 3 | 70.41  |
| 1112 | 2_WT.nd2 | 7 | 105 | 97995  | 5 | 40     |
| 1113 | 2_WT.nd2 | 7 | 106 | 121255 | 6 | 46     |
| 1114 | 2_WT.nd2 | 7 | 107 | 125732 | 6 | 52     |
| 1115 | 2_WT.nd2 | 7 | 108 | 58741  | 3 | 77.49  |
| 1116 | 2_WT.nd2 | 7 | 109 | 103702 | 5 | 60     |
| 1117 | 2_WT.nd2 | 7 | 110 | 23816  | 1 | 67.07  |
| 1118 | 2_WT.nd2 | 7 | 111 | 18774  | 1 | 144.78 |
| 1119 | 2_WT.nd2 | 7 | 112 | 20425  | 1 | 76.38  |
| 1120 | 2_WT.nd2 | 7 | 113 | 21131  | 1 | 72.01  |
| 1121 | 2_WT.nd2 | 7 | 114 | 15356  | 1 | 77.01  |
| 1122 | 2_WT.nd2 | 7 | 115 | 19963  | 1 | 82.81  |
| 1123 | 2_WT.nd2 | 7 | 116 | 25257  | 1 | 81.22  |
| 1124 | 2_WT.nd2 | 7 | 117 | 19005  | 1 | 48.7   |
| 1125 | 2_WT.nd2 | 7 | 118 | 21594  | 1 | 32.57  |
| 1126 | 2_WT.nd2 | 7 | 119 | 20446  | 1 | 127.91 |
| 1127 | 2_WT.nd2 | 7 | 120 | 19495  | 1 | 44.78  |
| 1128 | 2_WT.nd2 | 7 | 121 | 20851  | 1 | 117.89 |
| 1129 | 2_WT.nd2 | 7 | 122 | 21488  | 1 | 52.8   |
| 1130 | 2_WT.nd2 | 7 | 123 | 19236  | 1 | 82.33  |
| 1131 | 2_WT.nd2 | 7 | 124 | 19930  | 1 | 60.03  |
| 1132 | 2_WT.nd2 | 7 | 125 | 20900  | 1 | 90.71  |
| 1133 | 2_WT.nd2 | 7 | 126 | 37389  | 2 | 39.12  |

|      |          |   |     |        |   |       |
|------|----------|---|-----|--------|---|-------|
| 1134 | 2_WT.nd2 | 7 | 127 | 148409 | 7 | 21.1  |
| 1135 | 2_WT.nd2 | 7 | 128 | 77189  | 4 | 21.59 |
| 1136 | 2_WT.nd2 | 7 | 129 | 76076  | 4 | 22.14 |
| 1137 | 2_WT.nd2 | 7 | 130 | 22337  | 1 | 57.38 |
| 1138 | 2_WT.nd2 | 7 | 131 | 19742  | 1 | 22.47 |
| 1139 | 2_WT.nd2 | 7 | 132 | 89220  | 4 | 21.59 |
| 1140 | 2_WT.nd2 | 7 | 133 | 35934  | 2 | 25.94 |
| 1141 | 2_WT.nd2 | 7 | 134 | 19105  | 1 | 56.4  |
| 1142 | 2_WT.nd2 | 7 | 135 | 21041  | 1 | 14.42 |
| 1143 | 2_WT.nd2 | 7 | 136 | 55902  | 3 | 22.36 |
| 1144 | 2_WT.nd2 | 7 | 137 | 36568  | 2 | 26.25 |
| 1145 | 2_WT.nd2 | 7 | 138 | 87461  | 4 | 23.19 |
| 1146 | 2_WT.nd2 | 7 | 139 | 24547  | 1 | 12    |
| 1147 | 2_WT.nd2 | 7 | 140 | 38577  | 2 | 19.42 |
| 1148 | 2_WT.nd2 | 7 | 141 | 19924  | 1 | 92.13 |
| 1149 | 2_WT.nd2 | 7 | 142 | 155769 | 8 | 14.14 |
| 1150 | 2_WT.nd2 | 7 | 143 | 19434  | 1 | 35.17 |
| 1151 | 2_WT.nd2 | 7 | 144 | 20203  | 1 | 0     |
| 1152 | 2_WT.nd2 | 7 | 145 | 21576  | 1 | 20    |
| 1153 | 2_WT.nd2 | 7 | 146 | 19687  | 1 | 30    |
| 1154 | 2_WT.nd2 | 7 | 147 | 20035  | 1 | 24.35 |
| 1155 | 2_WT.nd2 | 7 | 148 | 47617  | 2 | 30.48 |
| 1156 | 2_WT.nd2 | 7 | 149 | 21825  | 1 | 27.31 |
| 1157 | 2_WT.nd2 | 7 | 150 | 17587  | 1 | 55.79 |
| 1158 | 2_WT.nd2 | 7 | 151 | 28867  | 1 | 53.08 |
| 1159 | 2_WT.nd2 | 7 | 152 | 60834  | 3 | 54    |
| 1160 | 2_WT.nd2 | 7 | 153 | 41276  | 2 | 58.31 |
| 1161 | 2_WT.nd2 | 8 | 1   | 18102  | 1 | 5     |
| 1162 | 2_WT.nd2 | 8 | 2   | 20643  | 1 | 6     |
| 1163 | 2_WT.nd2 | 8 | 3   | 35420  | 2 | 12.53 |
| 1164 | 2_WT.nd2 | 8 | 4   | 18608  | 1 | 13.89 |
| 1165 | 2_WT.nd2 | 8 | 5   | 18414  | 1 | 31.38 |
| 1166 | 2_WT.nd2 | 8 | 6   | 17855  | 1 | 38.47 |
| 1167 | 2_WT.nd2 | 8 | 7   | 37510  | 2 | 0     |
| 1168 | 2_WT.nd2 | 8 | 8   | 33682  | 2 | 0     |
| 1169 | 2_WT.nd2 | 8 | 9   | 19831  | 1 | 28.86 |
| 1170 | 2_WT.nd2 | 8 | 10  | 38476  | 2 | 21.63 |
| 1171 | 2_WT.nd2 | 8 | 11  | 21827  | 1 | 27.46 |
| 1172 | 2_WT.nd2 | 8 | 12  | 45695  | 2 | 22.63 |
| 1173 | 2_WT.nd2 | 8 | 13  | 37940  | 2 | 21.63 |
| 1174 | 2_WT.nd2 | 8 | 14  | 44715  | 2 | 24.21 |
| 1175 | 2_WT.nd2 | 8 | 15  | 38344  | 2 | 22.36 |
| 1176 | 2_WT.nd2 | 8 | 16  | 42513  | 2 | 25.5  |

|      |          |   |    |        |   |        |
|------|----------|---|----|--------|---|--------|
| 1177 | 2_WT.nd2 | 8 | 17 | 18950  | 1 | 74.33  |
| 1178 | 2_WT.nd2 | 8 | 18 | 77340  | 4 | 26.93  |
| 1179 | 2_WT.nd2 | 8 | 19 | 124366 | 6 | 30.41  |
| 1180 | 2_WT.nd2 | 8 | 20 | 19519  | 1 | 37     |
| 1181 | 2_WT.nd2 | 8 | 21 | 50524  | 3 | 34.53  |
| 1182 | 2_WT.nd2 | 8 | 22 | 34957  | 2 | 37     |
| 1183 | 2_WT.nd2 | 8 | 23 | 47641  | 2 | 82.64  |
| 1184 | 2_WT.nd2 | 8 | 24 | 30575  | 2 | 86.4   |
| 1185 | 2_WT.nd2 | 8 | 25 | 18934  | 1 | 41.48  |
| 1186 | 2_WT.nd2 | 8 | 26 | 65988  | 3 | 89.27  |
| 1187 | 2_WT.nd2 | 8 | 27 | 159419 | 8 | 94.37  |
| 1188 | 2_WT.nd2 | 8 | 28 | 59419  | 3 | 96.8   |
| 1189 | 2_WT.nd2 | 8 | 29 | 125468 | 6 | 95.75  |
| 1190 | 2_WT.nd2 | 8 | 30 | 128463 | 6 | 96.15  |
| 1191 | 2_WT.nd2 | 8 | 31 | 34004  | 2 | 98.48  |
| 1192 | 2_WT.nd2 | 8 | 32 | 74992  | 4 | 103.41 |
| 1193 | 2_WT.nd2 | 8 | 33 | 39121  | 2 | 107.17 |
| 1194 | 2_WT.nd2 | 8 | 34 | 33678  | 2 | 111.13 |
| 1195 | 2_WT.nd2 | 8 | 35 | 21293  | 1 | 116    |
| 1196 | 2_WT.nd2 | 8 | 36 | 21652  | 1 | 179.23 |
| 1197 | 2_WT.nd2 | 8 | 37 | 43263  | 2 | 125.87 |
| 1198 | 2_WT.nd2 | 8 | 38 | 33252  | 2 | 185.65 |
| 1199 | 2_WT.nd2 | 8 | 39 | 23884  | 1 | 142.13 |
| 1200 | 2_WT.nd2 | 8 | 40 | 43849  | 2 | 161.2  |
| 1201 | 2_WT.nd2 | 8 | 41 | 50058  | 2 | 176.82 |
| 1202 | 2_WT.nd2 | 8 | 42 | 84324  | 4 | 175.41 |
| 1203 | 2_WT.nd2 | 8 | 43 | 83551  | 4 | 160.03 |
| 1204 | 2_WT.nd2 | 8 | 44 | 29760  | 1 | 65.03  |
| 1205 | 2_WT.nd2 | 8 | 45 | 95940  | 5 | 171.06 |
| 1206 | 2_WT.nd2 | 8 | 46 | 20503  | 1 | 60     |
| 1207 | 2_WT.nd2 | 8 | 47 | 19016  | 1 | 56     |
| 1208 | 2_WT.nd2 | 8 | 48 | 20387  | 1 | 51.66  |
| 1209 | 2_WT.nd2 | 8 | 49 | 23154  | 1 | 50.04  |
| 1210 | 2_WT.nd2 | 8 | 50 | 20895  | 1 | 205    |
| 1211 | 2_WT.nd2 | 8 | 51 | 22492  | 1 | 0      |
| 1212 | 2_WT.nd2 | 8 | 52 | 19099  | 1 | 27.73  |
| 1213 | 2_WT.nd2 | 8 | 53 | 23999  | 1 | 25     |
| 1214 | 2_WT.nd2 | 8 | 54 | 16613  | 1 | 63     |
| 1215 | 2_WT.nd2 | 8 | 55 | 21690  | 1 | 12.17  |
| 1216 | 2_WT.nd2 | 8 | 56 | 17705  | 1 | 177.05 |
| 1217 | 2_WT.nd2 | 8 | 57 | 22854  | 1 | 24.19  |
| 1218 | 2_WT.nd2 | 8 | 58 | 21438  | 1 | 22     |
| 1219 | 2_WT.nd2 | 8 | 59 | 26097  | 1 | 27.86  |

|      |          |   |     |       |   |       |
|------|----------|---|-----|-------|---|-------|
| 1220 | 2_WT.nd2 | 8 | 60  | 24514 | 1 | 34.18 |
| 1221 | 2_WT.nd2 | 8 | 61  | 25506 | 1 | 39.82 |
| 1222 | 2_WT.nd2 | 8 | 62  | 16832 | 1 | 32.8  |
| 1223 | 2_WT.nd2 | 8 | 63  | 19097 | 1 | 25.06 |
| 1224 | 2_WT.nd2 | 8 | 64  | 20525 | 1 | 53.04 |
| 1225 | 2_WT.nd2 | 8 | 65  | 23081 | 1 | 44.55 |
| 1226 | 2_WT.nd2 | 8 | 66  | 25054 | 1 | 38.47 |
| 1227 | 2_WT.nd2 | 8 | 67  | 22144 | 1 | 26.48 |
| 1228 | 2_WT.nd2 | 8 | 68  | 24503 | 1 | 24    |
| 1229 | 2_WT.nd2 | 8 | 69  | 22076 | 1 | 18.03 |
| 1230 | 2_WT.nd2 | 8 | 70  | 48648 | 2 | 13.6  |
| 1231 | 2_WT.nd2 | 8 | 71  | 19178 | 1 | 9.9   |
| 1232 | 2_WT.nd2 | 8 | 72  | 58297 | 3 | 15.3  |
| 1233 | 2_WT.nd2 | 8 | 73  | 52918 | 3 | 8.06  |
| 1234 | 2_WT.nd2 | 8 | 74  | 28376 | 1 | 0     |
| 1235 | 2_WT.nd2 | 8 | 75  | 46978 | 2 | 11.18 |
| 1236 | 2_WT.nd2 | 8 | 76  | 49317 | 2 | 14.21 |
| 1237 | 2_WT.nd2 | 8 | 77  | 18811 | 1 | 5     |
| 1238 | 2_WT.nd2 | 8 | 78  | 74891 | 4 | 20    |
| 1239 | 2_WT.nd2 | 8 | 79  | 22618 | 1 | 19.24 |
| 1240 | 2_WT.nd2 | 8 | 80  | 47819 | 2 | 29.07 |
| 1241 | 2_WT.nd2 | 8 | 81  | 68243 | 3 | 8.94  |
| 1242 | 2_WT.nd2 | 8 | 82  | 44445 | 2 | 5     |
| 1243 | 2_WT.nd2 | 8 | 83  | 57813 | 3 | 0     |
| 1244 | 2_WT.nd2 | 8 | 84  | 56765 | 3 | 46.04 |
| 1245 | 2_WT.nd2 | 8 | 85  | 19675 | 1 | 2.24  |
| 1246 | 2_WT.nd2 | 8 | 86  | 22441 | 1 | 54.01 |
| 1247 | 2_WT.nd2 | 8 | 87  | 21920 | 1 | 55.73 |
| 1248 | 2_WT.nd2 | 8 | 88  | 24471 | 1 | 59.67 |
| 1249 | 2_WT.nd2 | 8 | 89  | 19963 | 1 | 50.12 |
| 1250 | 2_WT.nd2 | 8 | 90  | 19440 | 1 | 59.94 |
| 1251 | 2_WT.nd2 | 8 | 91  | 70802 | 4 | 53.26 |
| 1252 | 2_WT.nd2 | 8 | 92  | 21354 | 1 | 37.11 |
| 1253 | 2_WT.nd2 | 8 | 93  | 45106 | 2 | 66.84 |
| 1254 | 2_WT.nd2 | 8 | 94  | 60876 | 3 | 63.64 |
| 1255 | 2_WT.nd2 | 8 | 95  | 27859 | 1 | 74.03 |
| 1256 | 2_WT.nd2 | 8 | 96  | 20486 | 1 | 71.45 |
| 1257 | 2_WT.nd2 | 8 | 97  | 23553 | 1 | 67.48 |
| 1258 | 2_WT.nd2 | 8 | 98  | 21558 | 1 | 73.55 |
| 1259 | 2_WT.nd2 | 8 | 99  | 26561 | 1 | 66.19 |
| 1260 | 2_WT.nd2 | 8 | 100 | 16510 | 1 | 79.4  |
| 1261 | 2_WT.nd2 | 8 | 101 | 19445 | 1 | 75.8  |
| 1262 | 2_WT.nd2 | 8 | 102 | 21301 | 1 | 74.95 |



|      |          |   |     |        |   |       |
|------|----------|---|-----|--------|---|-------|
| 1263 | 2_WT.nd2 | 8 | 103 | 21126  | 1 | 70.34 |
| 1264 | 2_WT.nd2 | 8 | 104 | 120695 | 6 | 71.06 |
| 1265 | 2_WT.nd2 | 8 | 105 | 67374  | 3 | 71.11 |
| 1266 | 2_WT.nd2 | 8 | 106 | 36221  | 2 | 79.43 |
| 1267 | 2_WT.nd2 | 8 | 107 | 22230  | 1 | 82.22 |
| 1268 | 2_WT.nd2 | 8 | 108 | 45818  | 2 | 83.86 |
| 1269 | 2_WT.nd2 | 8 | 109 | 19003  | 1 | 88.23 |
| 1270 | 2_WT.nd2 | 8 | 110 | 19844  | 1 | 85.33 |
| 1271 | 2_WT.nd2 | 9 | 1   | 16645  | 1 | 8     |
| 1272 | 2_WT.nd2 | 9 | 2   | 15649  | 1 | 97.58 |
| 1273 | 2_WT.nd2 | 9 | 3   | 20099  | 1 | 83.52 |
| 1274 | 2_WT.nd2 | 9 | 4   | 31592  | 2 | 16.76 |
| 1275 | 2_WT.nd2 | 9 | 5   | 43951  | 2 | 12.65 |
| 1276 | 2_WT.nd2 | 9 | 6   | 23291  | 1 | 26.68 |
| 1277 | 2_WT.nd2 | 9 | 7   | 21766  | 1 | 9.43  |
| 1278 | 2_WT.nd2 | 9 | 8   | 33087  | 2 | 9.22  |
| 1279 | 2_WT.nd2 | 9 | 9   | 43322  | 2 | 10    |
| 1280 | 2_WT.nd2 | 9 | 10  | 21967  | 1 | 12.37 |
| 1281 | 2_WT.nd2 | 9 | 11  | 20713  | 1 | 57.01 |
| 1282 | 2_WT.nd2 | 9 | 12  | 20105  | 1 | 15.65 |
| 1283 | 2_WT.nd2 | 9 | 13  | 20661  | 1 | 15.3  |
| 1284 | 2_WT.nd2 | 9 | 14  | 68310  | 3 | 1     |
| 1285 | 2_WT.nd2 | 9 | 15  | 40469  | 2 | 20.12 |
| 1286 | 2_WT.nd2 | 9 | 16  | 21417  | 1 | 27.2  |
| 1287 | 2_WT.nd2 | 9 | 17  | 18772  | 1 | 1.41  |
| 1288 | 2_WT.nd2 | 9 | 18  | 31153  | 2 | 0     |
| 1289 | 2_WT.nd2 | 9 | 19  | 18172  | 1 | 27.51 |
| 1290 | 2_WT.nd2 | 9 | 20  | 62087  | 3 | 30.89 |
| 1291 | 2_WT.nd2 | 9 | 21  | 18939  | 1 | 15.81 |
| 1292 | 2_WT.nd2 | 9 | 22  | 22622  | 1 | 11.4  |
| 1293 | 2_WT.nd2 | 9 | 23  | 53319  | 3 | 34.37 |
| 1294 | 2_WT.nd2 | 9 | 24  | 103062 | 5 | 27.89 |
| 1295 | 2_WT.nd2 | 9 | 25  | 49765  | 2 | 6.32  |
| 1296 | 2_WT.nd2 | 9 | 26  | 34199  | 2 | 7.81  |
| 1297 | 2_WT.nd2 | 9 | 27  | 87871  | 4 | 24.17 |
| 1298 | 2_WT.nd2 | 9 | 28  | 18661  | 1 | 49.4  |
| 1299 | 2_WT.nd2 | 9 | 29  | 56606  | 3 | 22.63 |
| 1300 | 2_WT.nd2 | 9 | 30  | 165484 | 8 | 21.4  |
| 1301 | 2_WT.nd2 | 9 | 31  | 81483  | 4 | 24.6  |
| 1302 | 2_WT.nd2 | 9 | 32  | 99295  | 5 | 28.46 |
| 1303 | 2_WT.nd2 | 9 | 33  | 81177  | 4 | 32.76 |
| 1304 | 2_WT.nd2 | 9 | 34  | 21510  | 1 | 24.52 |
| 1305 | 2_WT.nd2 | 9 | 35  | 153019 | 8 | 37.34 |

|      |          |   |    |        |    |        |
|------|----------|---|----|--------|----|--------|
| 1306 | 2_WT.nd2 | 9 | 36 | 144276 | 7  | 43.29  |
| 1307 | 2_WT.nd2 | 9 | 37 | 99572  | 5  | 48.09  |
| 1308 | 2_WT.nd2 | 9 | 38 | 30696  | 2  | 51.01  |
| 1309 | 2_WT.nd2 | 9 | 39 | 52808  | 3  | 55     |
| 1310 | 2_WT.nd2 | 9 | 40 | 27156  | 1  | 12     |
| 1311 | 2_WT.nd2 | 9 | 41 | 37008  | 2  | 60     |
| 1312 | 2_WT.nd2 | 9 | 42 | 24110  | 1  | 35.74  |
| 1313 | 2_WT.nd2 | 9 | 43 | 25210  | 1  | 75     |
| 1314 | 2_WT.nd2 | 9 | 44 | 23312  | 1  | 72.95  |
| 1315 | 2_WT.nd2 | 9 | 45 | 62669  | 3  | 50.29  |
| 1316 | 2_WT.nd2 | 9 | 46 | 66363  | 3  | 13     |
| 1317 | 2_WT.nd2 | 9 | 47 | 19031  | 1  | 70.6   |
| 1318 | 2_WT.nd2 | 9 | 48 | 32013  | 2  | 11.18  |
| 1319 | 2_WT.nd2 | 9 | 49 | 27678  | 1  | 10.05  |
| 1320 | 2_WT.nd2 | 9 | 50 | 32154  | 2  | 20.25  |
| 1321 | 2_WT.nd2 | 9 | 51 | 59399  | 3  | 9.22   |
| 1322 | 2_WT.nd2 | 9 | 52 | 129573 | 6  | 9.22   |
| 1323 | 2_WT.nd2 | 9 | 53 | 156684 | 8  | 4      |
| 1324 | 2_WT.nd2 | 9 | 54 | 154407 | 8  | 5      |
| 1325 | 2_WT.nd2 | 9 | 55 | 185546 | 9  | 14.32  |
| 1326 | 2_WT.nd2 | 9 | 56 | 100288 | 5  | 7      |
| 1327 | 2_WT.nd2 | 9 | 57 | 69664  | 3  | 13     |
| 1328 | 2_WT.nd2 | 9 | 58 | 109596 | 5  | 0      |
| 1329 | 2_WT.nd2 | 9 | 59 | 90412  | 4  | 0      |
| 1330 | 2_WT.nd2 | 9 | 60 | 119140 | 6  | 20.1   |
| 1331 | 2_WT.nd2 | 9 | 61 | 109181 | 5  | 25.08  |
| 1332 | 2_WT.nd2 | 9 | 62 | 19411  | 1  | 103.58 |
| 1333 | 2_WT.nd2 | 9 | 63 | 103541 | 5  | 0      |
| 1334 | 2_WT.nd2 | 9 | 64 | 21872  | 1  | 100.7  |
| 1335 | 2_WT.nd2 | 9 | 65 | 142831 | 7  | 1.41   |
| 1336 | 2_WT.nd2 | 9 | 66 | 56396  | 3  | 25     |
| 1337 | 2_WT.nd2 | 9 | 67 | 21972  | 1  | 39.46  |
| 1338 | 2_WT.nd2 | 9 | 68 | 82630  | 4  | 45.54  |
| 1339 | 2_WT.nd2 | 9 | 69 | 40221  | 2  | 29     |
| 1340 | 2_WT.nd2 | 9 | 70 | 254805 | 13 | 8.49   |
| 1341 | 2_WT.nd2 | 9 | 71 | 26010  | 1  | 25.96  |
| 1342 | 2_WT.nd2 | 9 | 72 | 93727  | 5  | 33.06  |
| 1343 | 2_WT.nd2 | 9 | 73 | 18872  | 1  | 88.6   |
| 1344 | 2_WT.nd2 | 9 | 74 | 81928  | 4  | 41     |
| 1345 | 2_WT.nd2 | 9 | 75 | 34429  | 2  | 35.36  |
| 1346 | 2_WT.nd2 | 9 | 76 | 45537  | 2  | 28.28  |
| 1347 | 2_WT.nd2 | 9 | 77 | 18190  | 1  | 29.73  |
| 1348 | 2_WT.nd2 | 9 | 78 | 114271 | 6  | 38.29  |

|      |          |   |     |        |    |        |
|------|----------|---|-----|--------|----|--------|
| 1349 | 2_WT.nd2 | 9 | 79  | 46243  | 2  | 51.04  |
| 1350 | 2_WT.nd2 | 9 | 80  | 122756 | 6  | 34.66  |
| 1351 | 2_WT.nd2 | 9 | 81  | 85853  | 4  | 52.33  |
| 1352 | 2_WT.nd2 | 9 | 82  | 74271  | 4  | 35.47  |
| 1353 | 2_WT.nd2 | 9 | 83  | 33249  | 2  | 32.45  |
| 1354 | 2_WT.nd2 | 9 | 84  | 24452  | 1  | 56.08  |
| 1355 | 2_WT.nd2 | 9 | 85  | 35359  | 2  | 41.59  |
| 1356 | 2_WT.nd2 | 9 | 86  | 25154  | 1  | 59.01  |
| 1357 | 2_WT.nd2 | 9 | 87  | 28520  | 1  | 37.16  |
| 1358 | 2_WT.nd2 | 9 | 88  | 20699  | 1  | 14     |
| 1359 | 2_WT.nd2 | 9 | 89  | 26331  | 1  | 27.51  |
| 1360 | 2_WT.nd2 | 9 | 90  | 19527  | 1  | 39.81  |
| 1361 | 2_WT.nd2 | 9 | 91  | 73085  | 4  | 20.4   |
| 1362 | 2_WT.nd2 | 9 | 92  | 88905  | 4  | 16     |
| 1363 | 2_WT.nd2 | 9 | 93  | 89727  | 4  | 13.34  |
| 1364 | 2_WT.nd2 | 9 | 94  | 65902  | 3  | 13.42  |
| 1365 | 2_WT.nd2 | 9 | 95  | 21671  | 1  | 10.82  |
| 1366 | 2_WT.nd2 | 9 | 96  | 152195 | 8  | 5.83   |
| 1367 | 2_WT.nd2 | 9 | 97  | 22653  | 1  | 61.39  |
| 1368 | 2_WT.nd2 | 9 | 98  | 19731  | 1  | 31.78  |
| 1369 | 2_WT.nd2 | 9 | 99  | 20518  | 1  | 77     |
| 1370 | 2_WT.nd2 | 9 | 100 | 15804  | 1  | 44     |
| 1371 | 2_WT.nd2 | 9 | 101 | 21552  | 1  | 6.32   |
| 1372 | 2_WT.nd2 | 9 | 102 | 18305  | 1  | 90.45  |
| 1373 | 2_WT.nd2 | 9 | 103 | 24113  | 1  | 42     |
| 1374 | 2_WT.nd2 | 9 | 104 | 30357  | 2  | 40.26  |
| 1375 | 2_WT.nd2 | 9 | 105 | 19986  | 1  | 105.12 |
| 1376 | 2_WT.nd2 | 9 | 106 | 19736  | 1  | 108.17 |
| 1377 | 2_WT.nd2 | 9 | 107 | 19415  | 1  | 67.62  |
| 1378 | 2_WT.nd2 | 9 | 108 | 20324  | 1  | 87.71  |
| 1379 | 2_WT.nd2 | 9 | 109 | 26406  | 1  | 71.87  |
| 1380 | 2_WT.nd2 | 9 | 110 | 18008  | 1  | 76.11  |
| 1381 | 2_WT.nd2 | 9 | 111 | 19575  | 1  | 47.01  |
| 1382 | 2_WT.nd2 | 9 | 112 | 44916  | 2  | 53     |
| 1383 | 2_WT.nd2 | 9 | 113 | 40745  | 2  | 49     |
| 1384 | 2_WT.nd2 | 9 | 114 | 83074  | 4  | 36.06  |
| 1385 | 2_WT.nd2 | 9 | 115 | 171765 | 9  | 21.1   |
| 1386 | 2_WT.nd2 | 9 | 116 | 19594  | 1  | 28.84  |
| 1387 | 2_WT.nd2 | 9 | 117 | 212646 | 11 | 16.97  |
| 1388 | 2_WT.nd2 | 9 | 118 | 68648  | 3  | 19.92  |
| 1389 | 2_WT.nd2 | 9 | 119 | 52183  | 3  | 22.36  |
| 1390 | 2_WT.nd2 | 9 | 120 | 22687  | 1  | 26     |
| 1391 | 2_WT.nd2 | 9 | 121 | 43079  | 2  | 27.07  |

|      |          |   |     |        |   |       |
|------|----------|---|-----|--------|---|-------|
| 1392 | 2_WT.nd2 | 9 | 122 | 96093  | 5 | 32    |
| 1393 | 2_WT.nd2 | 9 | 123 | 159886 | 8 | 35.69 |
| 1394 | 2_WT.nd2 | 9 | 124 | 23814  | 1 | 52.17 |
| 1395 | 2_WT.nd2 | 9 | 125 | 56463  | 3 | 55.08 |
| 1396 | 2_WT.nd2 | 9 | 126 | 15808  | 1 | 19.24 |
| 1397 | 2_WT.nd2 | 9 | 127 | 56285  | 3 | 57.01 |
| 1398 | 2_WT.nd2 | 9 | 128 | 26193  | 1 | 48.84 |
| 1399 | 2_WT.nd2 | 9 | 129 | 27764  | 1 | 58    |
| 1400 | 2_WT.nd2 | 9 | 130 | 17750  | 1 | 27.46 |
| 1401 | 2_WT.nd2 | 9 | 131 | 25963  | 1 | 59.14 |
| 1402 | 2_WT.nd2 | 9 | 132 | 21256  | 1 | 31.78 |
| 1403 | 2_WT.nd2 | 9 | 133 | 24495  | 1 | 80.05 |
| 1404 | 2_WT.nd2 | 9 | 134 | 19043  | 1 | 84.65 |
| 1405 | 2_WT.nd2 | 9 | 135 | 31758  | 2 | 78.23 |
| 1406 | 2_WT.nd2 | 9 | 136 | 17993  | 1 | 22.85 |
| 1407 | 2_WT.nd2 | 9 | 137 | 18980  | 1 | 12    |
| 1408 | 2_WT.nd2 | 9 | 138 | 20976  | 1 | 57.25 |
| 1409 | 2_WT.nd2 | 9 | 139 | 22887  | 1 | 69.26 |
| 1410 | 2_WT.nd2 | 9 | 140 | 21792  | 1 | 13.6  |
| 1411 | 2_WT.nd2 | 9 | 141 | 17513  | 1 | 22    |
| 1412 | 2_WT.nd2 | 9 | 142 | 23040  | 1 | 86.09 |
| 1413 | 2_WT.nd2 | 9 | 143 | 17432  | 1 | 54.42 |
| 1414 | 2_WT.nd2 | 9 | 144 | 112792 | 6 | 7.07  |
| 1415 | 2_WT.nd2 | 9 | 145 | 55136  | 3 | 26.17 |
| 1416 | 2_WT.nd2 | 9 | 146 | 37137  | 2 | 11.7  |
| 1417 | 2_WT.nd2 | 9 | 147 | 21566  | 1 | 59.68 |
| 1418 | 2_WT.nd2 | 9 | 148 | 79307  | 4 | 7.21  |
| 1419 | 2_WT.nd2 | 9 | 149 | 24982  | 1 | 7.07  |
| 1420 | 2_WT.nd2 | 9 | 150 | 51821  | 3 | 40.01 |
| 1421 | 2_WT.nd2 | 9 | 151 | 48875  | 2 | 20.22 |
| 1422 | 2_WT.nd2 | 9 | 152 | 22180  | 1 | 2     |
| 1423 | 2_WT.nd2 | 9 | 153 | 32900  | 2 | 44.28 |
| 1424 | 2_WT.nd2 | 9 | 154 | 29921  | 1 | 16.12 |
| 1425 | 2_WT.nd2 | 9 | 155 | 18024  | 1 | 8.54  |
| 1426 | 2_WT.nd2 | 9 | 156 | 76057  | 4 | 27    |
| 1427 | 2_WT.nd2 | 9 | 157 | 30693  | 2 | 34.01 |
| 1428 | 2_WT.nd2 | 9 | 158 | 37550  | 2 | 22.02 |
| 1429 | 2_WT.nd2 | 9 | 159 | 22681  | 1 | 19    |
| 1430 | 2_WT.nd2 | 9 | 160 | 21351  | 1 | 5     |
| 1431 | 2_WT.nd2 | 9 | 161 | 26363  | 1 | 31    |
| 1432 | 2_WT.nd2 | 9 | 162 | 20693  | 1 | 46.87 |
| 1433 | 2_WT.nd2 | 9 | 163 | 22616  | 1 | 0     |
| 1434 | 2_WT.nd2 | 9 | 164 | 18697  | 1 | 19.24 |

|      |          |   |     |        |   |        |
|------|----------|---|-----|--------|---|--------|
| 1435 | 2_WT.nd2 | 9 | 165 | 23549  | 1 | 68.73  |
| 1    | 3_WT.nd2 | 1 | 1   | 14277  | 1 | 104.81 |
| 2    | 3_WT.nd2 | 1 | 2   | 16974  | 1 | 11.18  |
| 3    | 3_WT.nd2 | 1 | 3   | 38672  | 2 | 2      |
| 4    | 3_WT.nd2 | 1 | 4   | 21884  | 1 | 36     |
| 5    | 3_WT.nd2 | 1 | 5   | 16111  | 1 | 16     |
| 6    | 3_WT.nd2 | 1 | 6   | 17623  | 1 | 11.05  |
| 7    | 3_WT.nd2 | 1 | 7   | 17296  | 1 | 13.89  |
| 8    | 3_WT.nd2 | 1 | 8   | 15878  | 1 | 36.12  |
| 9    | 3_WT.nd2 | 1 | 9   | 15735  | 1 | 26.17  |
| 10   | 3_WT.nd2 | 1 | 10  | 20455  | 1 | 16.97  |
| 11   | 3_WT.nd2 | 1 | 11  | 16301  | 1 | 32.8   |
| 12   | 3_WT.nd2 | 1 | 12  | 28331  | 1 | 40.31  |
| 13   | 3_WT.nd2 | 1 | 13  | 19306  | 1 | 44.18  |
| 14   | 3_WT.nd2 | 1 | 14  | 19737  | 1 | 24.08  |
| 15   | 3_WT.nd2 | 1 | 15  | 18751  | 1 | 89.55  |
| 16   | 3_WT.nd2 | 1 | 16  | 21692  | 1 | 16.03  |
| 17   | 3_WT.nd2 | 1 | 17  | 22181  | 1 | 46.17  |
| 18   | 3_WT.nd2 | 1 | 18  | 16802  | 1 | 79.06  |
| 19   | 3_WT.nd2 | 1 | 19  | 20311  | 1 | 4      |
| 20   | 3_WT.nd2 | 1 | 20  | 119402 | 6 | 17     |
| 21   | 3_WT.nd2 | 1 | 21  | 19914  | 1 | 0      |
| 22   | 3_WT.nd2 | 1 | 22  | 83765  | 4 | 11.4   |
| 23   | 3_WT.nd2 | 1 | 23  | 135991 | 7 | 5.66   |
| 24   | 3_WT.nd2 | 1 | 24  | 19201  | 1 | 69.18  |
| 25   | 3_WT.nd2 | 1 | 25  | 59717  | 3 | 7.62   |
| 26   | 3_WT.nd2 | 1 | 26  | 18822  | 1 | 57.49  |
| 27   | 3_WT.nd2 | 1 | 27  | 18832  | 1 | 10.44  |
| 28   | 3_WT.nd2 | 1 | 28  | 20729  | 1 | 54.12  |
| 29   | 3_WT.nd2 | 1 | 29  | 126077 | 6 | 12.04  |
| 30   | 3_WT.nd2 | 1 | 30  | 19384  | 1 | 55     |
| 31   | 3_WT.nd2 | 1 | 31  | 17638  | 1 | 52.15  |
| 32   | 3_WT.nd2 | 1 | 32  | 20442  | 1 | 22.8   |
| 33   | 3_WT.nd2 | 1 | 33  | 16616  | 1 | 26.25  |
| 34   | 3_WT.nd2 | 1 | 34  | 98265  | 5 | 25.63  |
| 35   | 3_WT.nd2 | 1 | 35  | 56765  | 3 | 29.43  |
| 36   | 3_WT.nd2 | 1 | 36  | 103181 | 5 | 30.46  |
| 37   | 3_WT.nd2 | 1 | 37  | 17116  | 1 | 67.88  |
| 38   | 3_WT.nd2 | 1 | 38  | 23528  | 1 | 48.47  |
| 39   | 3_WT.nd2 | 1 | 39  | 98297  | 5 | 27.2   |
| 40   | 3_WT.nd2 | 1 | 40  | 54503  | 3 | 26.17  |
| 41   | 3_WT.nd2 | 1 | 41  | 78822  | 4 | 17.03  |
| 42   | 3_WT.nd2 | 1 | 42  | 111019 | 6 | 14.76  |

|    |          |   |    |        |   |        |
|----|----------|---|----|--------|---|--------|
| 43 | 3_WT.nd2 | 1 | 43 | 55447  | 3 | 19.42  |
| 44 | 3_WT.nd2 | 1 | 44 | 65180  | 3 | 18.44  |
| 45 | 3_WT.nd2 | 1 | 45 | 39320  | 2 | 25.61  |
| 46 | 3_WT.nd2 | 1 | 46 | 26434  | 1 | 30.02  |
| 47 | 3_WT.nd2 | 1 | 47 | 35455  | 2 | 23.35  |
| 48 | 3_WT.nd2 | 1 | 48 | 40652  | 2 | 25.81  |
| 49 | 3_WT.nd2 | 1 | 49 | 24489  | 1 | 30.48  |
| 50 | 3_WT.nd2 | 1 | 50 | 39282  | 2 | 28.3   |
| 51 | 3_WT.nd2 | 1 | 51 | 20731  | 1 | 5      |
| 52 | 3_WT.nd2 | 1 | 52 | 36085  | 2 | 34     |
| 53 | 3_WT.nd2 | 1 | 53 | 25026  | 1 | 31.4   |
| 54 | 3_WT.nd2 | 1 | 54 | 33572  | 2 | 44.28  |
| 55 | 3_WT.nd2 | 1 | 55 | 17543  | 1 | 91.48  |
| 56 | 3_WT.nd2 | 1 | 56 | 20689  | 1 | 136.42 |
| 57 | 3_WT.nd2 | 1 | 57 | 18614  | 1 | 54.08  |
| 58 | 3_WT.nd2 | 1 | 58 | 20229  | 1 | 43.32  |
| 59 | 3_WT.nd2 | 1 | 59 | 15918  | 1 | 122.64 |
| 60 | 3_WT.nd2 | 1 | 60 | 47418  | 2 | 78.71  |
| 61 | 3_WT.nd2 | 1 | 61 | 17865  | 1 | 45.34  |
| 62 | 3_WT.nd2 | 1 | 62 | 16951  | 1 | 64.12  |
| 63 | 3_WT.nd2 | 1 | 63 | 16769  | 1 | 73.06  |
| 64 | 3_WT.nd2 | 1 | 64 | 22513  | 1 | 72.84  |
| 65 | 3_WT.nd2 | 1 | 65 | 35145  | 2 | 83     |
| 66 | 3_WT.nd2 | 1 | 66 | 23985  | 1 | 84.02  |
| 67 | 3_WT.nd2 | 1 | 67 | 15995  | 1 | 63.66  |
| 68 | 3_WT.nd2 | 1 | 68 | 16138  | 1 | 91     |
| 69 | 3_WT.nd2 | 1 | 69 | 27800  | 1 | 92.27  |
| 70 | 3_WT.nd2 | 1 | 70 | 19482  | 1 | 10.2   |
| 71 | 3_WT.nd2 | 1 | 71 | 27929  | 1 | 58.41  |
| 72 | 3_WT.nd2 | 1 | 72 | 16124  | 1 | 98.99  |
| 73 | 3_WT.nd2 | 1 | 73 | 20868  | 1 | 33.02  |
| 74 | 3_WT.nd2 | 1 | 74 | 29380  | 1 | 57.31  |
| 75 | 3_WT.nd2 | 1 | 75 | 37185  | 2 | 52.84  |
| 76 | 3_WT.nd2 | 1 | 76 | 25807  | 1 | 42.2   |
| 77 | 3_WT.nd2 | 1 | 77 | 57412  | 3 | 45.62  |
| 78 | 3_WT.nd2 | 1 | 78 | 47253  | 2 | 40.31  |
| 79 | 3_WT.nd2 | 1 | 79 | 21637  | 1 | 24.21  |
| 80 | 3_WT.nd2 | 1 | 80 | 19380  | 1 | 42.06  |
| 81 | 3_WT.nd2 | 1 | 81 | 21263  | 1 | 31.05  |
| 82 | 3_WT.nd2 | 1 | 82 | 143601 | 7 | 20.62  |
| 83 | 3_WT.nd2 | 1 | 83 | 61231  | 3 | 2.24   |
| 84 | 3_WT.nd2 | 1 | 84 | 77473  | 4 | 3      |
| 85 | 3_WT.nd2 | 1 | 85 | 61803  | 3 | 14.32  |

|     |          |   |     |       |   |        |
|-----|----------|---|-----|-------|---|--------|
| 86  | 3_WT.nd2 | 1 | 86  | 82615 | 4 | 10.44  |
| 87  | 3_WT.nd2 | 1 | 87  | 38597 | 2 | 7.21   |
| 88  | 3_WT.nd2 | 1 | 88  | 45209 | 2 | 5      |
| 89  | 3_WT.nd2 | 1 | 89  | 21357 | 1 | 37.8   |
| 90  | 3_WT.nd2 | 1 | 90  | 19445 | 1 | 12.81  |
| 91  | 3_WT.nd2 | 1 | 91  | 23287 | 1 | 4.12   |
| 92  | 3_WT.nd2 | 1 | 92  | 15829 | 1 | 88.96  |
| 93  | 3_WT.nd2 | 1 | 93  | 50604 | 3 | 21.84  |
| 94  | 3_WT.nd2 | 1 | 94  | 43449 | 2 | 17.46  |
| 95  | 3_WT.nd2 | 1 | 95  | 17727 | 1 | 6.4    |
| 96  | 3_WT.nd2 | 1 | 96  | 17127 | 1 | 104.48 |
| 97  | 3_WT.nd2 | 1 | 97  | 18170 | 1 | 33.12  |
| 98  | 3_WT.nd2 | 1 | 98  | 19191 | 1 | 114.63 |
| 99  | 3_WT.nd2 | 1 | 99  | 16969 | 1 | 52.81  |
| 100 | 3_WT.nd2 | 1 | 100 | 18254 | 1 | 53.94  |
| 101 | 3_WT.nd2 | 1 | 101 | 78193 | 4 | 63.25  |
| 102 | 3_WT.nd2 | 1 | 102 | 24424 | 1 | 76.66  |
| 103 | 3_WT.nd2 | 1 | 103 | 18173 | 1 | 94.25  |
| 104 | 3_WT.nd2 | 2 | 1   | 19091 | 1 | 27.86  |
| 105 | 3_WT.nd2 | 2 | 2   | 21612 | 1 | 19.65  |
| 106 | 3_WT.nd2 | 2 | 3   | 18037 | 1 | 14.04  |
| 107 | 3_WT.nd2 | 2 | 4   | 30616 | 2 | 19.1   |
| 108 | 3_WT.nd2 | 2 | 5   | 18903 | 1 | 26.57  |
| 109 | 3_WT.nd2 | 2 | 6   | 16473 | 1 | 76     |
| 110 | 3_WT.nd2 | 2 | 7   | 25729 | 1 | 39.01  |
| 111 | 3_WT.nd2 | 2 | 8   | 23366 | 1 | 36.4   |
| 112 | 3_WT.nd2 | 2 | 9   | 17425 | 1 | 74.04  |
| 113 | 3_WT.nd2 | 2 | 10  | 16559 | 1 | 83.74  |
| 114 | 3_WT.nd2 | 2 | 11  | 20913 | 1 | 46.87  |
| 115 | 3_WT.nd2 | 2 | 12  | 19203 | 1 | 25     |
| 116 | 3_WT.nd2 | 2 | 13  | 22318 | 1 | 41.62  |
| 117 | 3_WT.nd2 | 2 | 14  | 23778 | 1 | 54.08  |
| 118 | 3_WT.nd2 | 2 | 15  | 27790 | 1 | 50.7   |
| 119 | 3_WT.nd2 | 2 | 16  | 19224 | 1 | 43     |
| 120 | 3_WT.nd2 | 2 | 17  | 18380 | 1 | 36.72  |
| 121 | 3_WT.nd2 | 2 | 18  | 63197 | 3 | 28.44  |
| 122 | 3_WT.nd2 | 2 | 19  | 17984 | 1 | 45.69  |
| 123 | 3_WT.nd2 | 2 | 20  | 32590 | 2 | 22.83  |
| 124 | 3_WT.nd2 | 2 | 21  | 38277 | 2 | 29.15  |
| 125 | 3_WT.nd2 | 2 | 22  | 19409 | 1 | 37.85  |
| 126 | 3_WT.nd2 | 2 | 23  | 32602 | 2 | 102.18 |
| 127 | 3_WT.nd2 | 2 | 24  | 25697 | 1 | 27.66  |
| 128 | 3_WT.nd2 | 2 | 25  | 25171 | 1 | 46.17  |

|     |          |   |    |       |   |        |
|-----|----------|---|----|-------|---|--------|
| 129 | 3_WT.nd2 | 2 | 26 | 63029 | 3 | 41.44  |
| 130 | 3_WT.nd2 | 2 | 27 | 62298 | 3 | 36.88  |
| 131 | 3_WT.nd2 | 2 | 28 | 29856 | 1 | 64.41  |
| 132 | 3_WT.nd2 | 2 | 29 | 30284 | 2 | 24.08  |
| 133 | 3_WT.nd2 | 2 | 30 | 22475 | 1 | 78.55  |
| 134 | 3_WT.nd2 | 2 | 31 | 43311 | 2 | 85.88  |
| 135 | 3_WT.nd2 | 2 | 32 | 18714 | 1 | 97.99  |
| 136 | 3_WT.nd2 | 2 | 33 | 25046 | 1 | 66.29  |
| 137 | 3_WT.nd2 | 2 | 34 | 59555 | 3 | 48.88  |
| 138 | 3_WT.nd2 | 2 | 35 | 42273 | 2 | 39     |
| 139 | 3_WT.nd2 | 2 | 36 | 18831 | 1 | 81.88  |
| 140 | 3_WT.nd2 | 2 | 37 | 53095 | 3 | 33.96  |
| 141 | 3_WT.nd2 | 2 | 38 | 17436 | 1 | 29.12  |
| 142 | 3_WT.nd2 | 2 | 39 | 18416 | 1 | 34.93  |
| 143 | 3_WT.nd2 | 2 | 40 | 17313 | 1 | 97.16  |
| 144 | 3_WT.nd2 | 2 | 41 | 25148 | 1 | 28.6   |
| 145 | 3_WT.nd2 | 2 | 42 | 31955 | 2 | 29     |
| 146 | 3_WT.nd2 | 2 | 43 | 16234 | 1 | 103.81 |
| 147 | 3_WT.nd2 | 2 | 44 | 16692 | 1 | 47.17  |
| 148 | 3_WT.nd2 | 2 | 45 | 15745 | 1 | 38.9   |
| 149 | 3_WT.nd2 | 2 | 46 | 12194 | 1 | 38.9   |
| 150 | 3_WT.nd2 | 2 | 47 | 44276 | 2 | 136.42 |
| 151 | 3_WT.nd2 | 3 | 1  | 16248 | 1 | 17.49  |
| 152 | 3_WT.nd2 | 3 | 2  | 18542 | 1 | 9.22   |
| 153 | 3_WT.nd2 | 3 | 3  | 52412 | 3 | 4.12   |
| 154 | 3_WT.nd2 | 3 | 4  | 57761 | 3 | 0      |
| 155 | 3_WT.nd2 | 3 | 5  | 26864 | 1 | 0      |
| 156 | 3_WT.nd2 | 3 | 6  | 17614 | 1 | 9      |
| 157 | 3_WT.nd2 | 3 | 7  | 21708 | 1 | 14.04  |
| 158 | 3_WT.nd2 | 3 | 8  | 18076 | 1 | 19     |
| 159 | 3_WT.nd2 | 3 | 9  | 28798 | 1 | 24.17  |
| 160 | 3_WT.nd2 | 3 | 10 | 19244 | 1 | 25     |
| 161 | 3_WT.nd2 | 3 | 11 | 40147 | 2 | 27.51  |
| 162 | 3_WT.nd2 | 3 | 12 | 28315 | 1 | 29     |
| 163 | 3_WT.nd2 | 3 | 13 | 24343 | 1 | 31.32  |
| 164 | 3_WT.nd2 | 3 | 14 | 16602 | 1 | 35.36  |
| 165 | 3_WT.nd2 | 3 | 15 | 39390 | 2 | 41.98  |
| 166 | 3_WT.nd2 | 3 | 16 | 17221 | 1 | 77.9   |
| 167 | 3_WT.nd2 | 3 | 17 | 53687 | 3 | 126.89 |
| 168 | 3_WT.nd2 | 3 | 18 | 20734 | 1 | 12     |
| 169 | 3_WT.nd2 | 3 | 19 | 40788 | 2 | 19.85  |
| 170 | 3_WT.nd2 | 3 | 20 | 15354 | 1 | 138.44 |
| 171 | 3_WT.nd2 | 3 | 21 | 29362 | 1 | 34.66  |



|     |          |   |    |        |   |        |
|-----|----------|---|----|--------|---|--------|
| 172 | 3_WT.nd2 | 3 | 22 | 25119  | 1 | 29.73  |
| 173 | 3_WT.nd2 | 3 | 23 | 39265  | 2 | 25.61  |
| 174 | 3_WT.nd2 | 3 | 24 | 18150  | 1 | 43.19  |
| 175 | 3_WT.nd2 | 3 | 25 | 39855  | 2 | 21.1   |
| 176 | 3_WT.nd2 | 3 | 26 | 29850  | 1 | 40.22  |
| 177 | 3_WT.nd2 | 3 | 27 | 18764  | 1 | 80.62  |
| 178 | 3_WT.nd2 | 3 | 28 | 65782  | 3 | 15.62  |
| 179 | 3_WT.nd2 | 3 | 29 | 21057  | 1 | 48.41  |
| 180 | 3_WT.nd2 | 3 | 30 | 19627  | 1 | 53.26  |
| 181 | 3_WT.nd2 | 3 | 31 | 82167  | 4 | 10.77  |
| 182 | 3_WT.nd2 | 3 | 32 | 22996  | 1 | 0      |
| 183 | 3_WT.nd2 | 3 | 33 | 90816  | 5 | 9      |
| 184 | 3_WT.nd2 | 3 | 34 | 19843  | 1 | 1      |
| 185 | 3_WT.nd2 | 3 | 35 | 20692  | 1 | 0      |
| 186 | 3_WT.nd2 | 3 | 36 | 74380  | 4 | 7.62   |
| 187 | 3_WT.nd2 | 3 | 37 | 81322  | 4 | 8.06   |
| 188 | 3_WT.nd2 | 3 | 38 | 133889 | 7 | 10.63  |
| 189 | 3_WT.nd2 | 3 | 39 | 150467 | 7 | 18.36  |
| 190 | 3_WT.nd2 | 3 | 40 | 16739  | 1 | 87.3   |
| 191 | 3_WT.nd2 | 3 | 41 | 18639  | 1 | 28     |
| 192 | 3_WT.nd2 | 3 | 42 | 20966  | 1 | 24.19  |
| 193 | 3_WT.nd2 | 3 | 43 | 20007  | 1 | 21.59  |
| 194 | 3_WT.nd2 | 3 | 44 | 21339  | 1 | 37.74  |
| 195 | 3_WT.nd2 | 3 | 45 | 22200  | 1 | 25.24  |
| 196 | 3_WT.nd2 | 3 | 46 | 32347  | 2 | 28.65  |
| 197 | 3_WT.nd2 | 3 | 47 | 19125  | 1 | 32.65  |
| 198 | 3_WT.nd2 | 3 | 48 | 18111  | 1 | 132.65 |
| 199 | 3_WT.nd2 | 3 | 49 | 49805  | 2 | 22.47  |
| 200 | 3_WT.nd2 | 3 | 50 | 60758  | 3 | 3.61   |
| 201 | 3_WT.nd2 | 3 | 51 | 17865  | 1 | 104.65 |
| 202 | 3_WT.nd2 | 3 | 52 | 73438  | 4 | 27.73  |
| 203 | 3_WT.nd2 | 3 | 53 | 26302  | 1 | 2      |
| 204 | 3_WT.nd2 | 3 | 54 | 36816  | 2 | 35.13  |
| 205 | 3_WT.nd2 | 3 | 55 | 18783  | 1 | 82.73  |
| 206 | 3_WT.nd2 | 3 | 56 | 22987  | 1 | 0      |
| 207 | 3_WT.nd2 | 3 | 57 | 22851  | 1 | 68.88  |
| 208 | 3_WT.nd2 | 3 | 58 | 23058  | 1 | 75.07  |
| 209 | 3_WT.nd2 | 3 | 59 | 18941  | 1 | 76.32  |
| 210 | 3_WT.nd2 | 3 | 60 | 17958  | 1 | 62.27  |
| 211 | 3_WT.nd2 | 3 | 61 | 16022  | 1 | 64.85  |
| 212 | 3_WT.nd2 | 3 | 62 | 16898  | 1 | 77.62  |
| 213 | 3_WT.nd2 | 3 | 63 | 16923  | 1 | 69.35  |
| 214 | 3_WT.nd2 | 3 | 64 | 19174  | 1 | 73.06  |

|     |          |   |    |       |   |        |
|-----|----------|---|----|-------|---|--------|
| 215 | 3_WT.nd2 | 3 | 65 | 22356 | 1 | 72     |
| 216 | 3_WT.nd2 | 3 | 66 | 19348 | 1 | 65.74  |
| 217 | 3_WT.nd2 | 3 | 67 | 22238 | 1 | 86.12  |
| 218 | 3_WT.nd2 | 3 | 68 | 22855 | 1 | 81.54  |
| 219 | 3_WT.nd2 | 3 | 69 | 86483 | 4 | 75.8   |
| 220 | 3_WT.nd2 | 3 | 70 | 48833 | 2 | 71.7   |
| 221 | 3_WT.nd2 | 3 | 71 | 61163 | 3 | 62.2   |
| 222 | 3_WT.nd2 | 3 | 72 | 39945 | 2 | 70.72  |
| 223 | 3_WT.nd2 | 3 | 73 | 50616 | 3 | 66.22  |
| 224 | 3_WT.nd2 | 3 | 74 | 21970 | 1 | 80.16  |
| 225 | 3_WT.nd2 | 3 | 75 | 35360 | 2 | 75.69  |
| 226 | 3_WT.nd2 | 3 | 76 | 18081 | 1 | 57.57  |
| 227 | 3_WT.nd2 | 3 | 77 | 19188 | 1 | 106    |
| 228 | 3_WT.nd2 | 3 | 78 | 19180 | 1 | 68.01  |
| 229 | 3_WT.nd2 | 3 | 79 | 15708 | 1 | 66.48  |
| 230 | 3_WT.nd2 | 3 | 80 | 20363 | 1 | 39.82  |
| 231 | 3_WT.nd2 | 3 | 81 | 22559 | 1 | 55.87  |
| 232 | 3_WT.nd2 | 3 | 82 | 31804 | 2 | 23.77  |
| 233 | 3_WT.nd2 | 3 | 83 | 20264 | 1 | 42.76  |
| 234 | 3_WT.nd2 | 3 | 84 | 18594 | 1 | 127.46 |
| 235 | 3_WT.nd2 | 3 | 85 | 55053 | 3 | 19.8   |
| 236 | 3_WT.nd2 | 3 | 86 | 19307 | 1 | 119.89 |
| 237 | 3_WT.nd2 | 3 | 87 | 23217 | 1 | 21.95  |
| 238 | 3_WT.nd2 | 3 | 88 | 19918 | 1 | 26.68  |
| 239 | 3_WT.nd2 | 3 | 89 | 48093 | 2 | 31.4   |
| 240 | 3_WT.nd2 | 3 | 90 | 49657 | 2 | 36.01  |
| 241 | 3_WT.nd2 | 3 | 91 | 19717 | 1 | 72.34  |
| 242 | 3_WT.nd2 | 3 | 92 | 27463 | 1 | 57.87  |
| 243 | 3_WT.nd2 | 3 | 93 | 36311 | 2 | 94     |
| 244 | 3_WT.nd2 | 3 | 94 | 19370 | 1 | 98.41  |
| 245 | 3_WT.nd2 | 3 | 95 | 20777 | 1 | 98.08  |
| 246 | 3_WT.nd2 | 4 | 1  | 17267 | 1 | 12     |
| 247 | 3_WT.nd2 | 4 | 2  | 95910 | 5 | 1.41   |
| 248 | 3_WT.nd2 | 4 | 3  | 24015 | 1 | 2      |
| 249 | 3_WT.nd2 | 4 | 4  | 71951 | 4 | 13.34  |
| 250 | 3_WT.nd2 | 4 | 5  | 56708 | 3 | 26.4   |
| 251 | 3_WT.nd2 | 4 | 6  | 29448 | 1 | 33.24  |
| 252 | 3_WT.nd2 | 4 | 7  | 20887 | 1 | 46.53  |
| 253 | 3_WT.nd2 | 4 | 8  | 57639 | 3 | 43.74  |
| 254 | 3_WT.nd2 | 4 | 9  | 17132 | 1 | 48.38  |
| 255 | 3_WT.nd2 | 4 | 10 | 15010 | 1 | 97.94  |
| 256 | 3_WT.nd2 | 4 | 11 | 17240 | 1 | 78.89  |
| 257 | 3_WT.nd2 | 4 | 12 | 18263 | 1 | 13.42  |

|     |          |   |    |       |   |        |
|-----|----------|---|----|-------|---|--------|
| 258 | 3_WT.nd2 | 4 | 13 | 17657 | 1 | 8.94   |
| 259 | 3_WT.nd2 | 4 | 14 | 19817 | 1 | 9.22   |
| 260 | 3_WT.nd2 | 4 | 15 | 27806 | 1 | 128.13 |
| 261 | 3_WT.nd2 | 4 | 16 | 19567 | 1 | 12.04  |
| 262 | 3_WT.nd2 | 4 | 17 | 26428 | 1 | 130.75 |
| 263 | 3_WT.nd2 | 4 | 18 | 58913 | 3 | 20.62  |
| 264 | 3_WT.nd2 | 4 | 19 | 17070 | 1 | 101.53 |
| 265 | 3_WT.nd2 | 4 | 20 | 19589 | 1 | 29     |
| 266 | 3_WT.nd2 | 4 | 21 | 22294 | 1 | 36.77  |
| 267 | 3_WT.nd2 | 4 | 22 | 17727 | 1 | 15     |
| 268 | 3_WT.nd2 | 4 | 23 | 23467 | 1 | 31.11  |
| 269 | 3_WT.nd2 | 4 | 24 | 29001 | 1 | 26.17  |
| 270 | 3_WT.nd2 | 4 | 25 | 21680 | 1 | 22.63  |
| 271 | 3_WT.nd2 | 4 | 26 | 18842 | 1 | 42.44  |
| 272 | 3_WT.nd2 | 4 | 27 | 37708 | 2 | 17.69  |
| 273 | 3_WT.nd2 | 4 | 28 | 21916 | 1 | 126.1  |
| 274 | 3_WT.nd2 | 4 | 29 | 27338 | 1 | 15.81  |
| 275 | 3_WT.nd2 | 4 | 30 | 50756 | 3 | 19.92  |
| 276 | 3_WT.nd2 | 4 | 31 | 24184 | 1 | 165.3  |
| 277 | 3_WT.nd2 | 4 | 32 | 51714 | 3 | 12.08  |
| 278 | 3_WT.nd2 | 4 | 33 | 19912 | 1 | 48     |
| 279 | 3_WT.nd2 | 4 | 34 | 60833 | 3 | 10     |
| 280 | 3_WT.nd2 | 4 | 35 | 64681 | 3 | 7.62   |
| 281 | 3_WT.nd2 | 4 | 36 | 73899 | 4 | 12.08  |
| 282 | 3_WT.nd2 | 4 | 37 | 67946 | 3 | 9.43   |
| 283 | 3_WT.nd2 | 4 | 38 | 43380 | 2 | 16.4   |
| 284 | 3_WT.nd2 | 4 | 39 | 54022 | 3 | 19.1   |
| 285 | 3_WT.nd2 | 4 | 40 | 89031 | 4 | 20.59  |
| 286 | 3_WT.nd2 | 4 | 41 | 17340 | 1 | 68.01  |
| 287 | 3_WT.nd2 | 4 | 42 | 19372 | 1 | 0      |
| 288 | 3_WT.nd2 | 4 | 43 | 15670 | 1 | 72.67  |
| 289 | 3_WT.nd2 | 4 | 44 | 20834 | 1 | 43.38  |
| 290 | 3_WT.nd2 | 4 | 45 | 30899 | 2 | 64.5   |
| 291 | 3_WT.nd2 | 4 | 46 | 17263 | 1 | 80.02  |
| 292 | 3_WT.nd2 | 4 | 47 | 19705 | 1 | 18.44  |
| 293 | 3_WT.nd2 | 4 | 48 | 60014 | 3 | 23.32  |
| 294 | 3_WT.nd2 | 4 | 49 | 29865 | 1 | 28.18  |
| 295 | 3_WT.nd2 | 4 | 50 | 95321 | 5 | 3.61   |
| 296 | 3_WT.nd2 | 4 | 51 | 87251 | 4 | 28.64  |
| 297 | 3_WT.nd2 | 4 | 52 | 16395 | 1 | 118.21 |
| 298 | 3_WT.nd2 | 4 | 53 | 24271 | 1 | 0      |
| 299 | 3_WT.nd2 | 4 | 54 | 20622 | 1 | 38.01  |
| 300 | 3_WT.nd2 | 4 | 55 | 15697 | 1 | 82.1   |

|     |          |   |    |       |   |        |
|-----|----------|---|----|-------|---|--------|
| 301 | 3_WT.nd2 | 4 | 56 | 26067 | 1 | 145.06 |
| 302 | 3_WT.nd2 | 4 | 57 | 23346 | 1 | 18.44  |
| 303 | 3_WT.nd2 | 4 | 58 | 22651 | 1 | 150.36 |
| 304 | 3_WT.nd2 | 4 | 59 | 16835 | 1 | 143    |
| 305 | 3_WT.nd2 | 4 | 60 | 20121 | 1 | 147.23 |
| 306 | 3_WT.nd2 | 4 | 61 | 31432 | 2 | 66.1   |
| 307 | 3_WT.nd2 | 4 | 62 | 17619 | 1 | 51.61  |
| 308 | 3_WT.nd2 | 4 | 63 | 17259 | 1 | 73.98  |
| 309 | 3_WT.nd2 | 4 | 64 | 20534 | 1 | 0      |
| 310 | 3_WT.nd2 | 4 | 65 | 17853 | 1 | 80.16  |
| 311 | 3_WT.nd2 | 4 | 66 | 20522 | 1 | 106    |
| 312 | 3_WT.nd2 | 4 | 67 | 17227 | 1 | 57.71  |
| 313 | 3_WT.nd2 | 4 | 68 | 18820 | 1 | 33.62  |
| 314 | 3_WT.nd2 | 4 | 69 | 19325 | 1 | 83.63  |
| 315 | 3_WT.nd2 | 4 | 70 | 19203 | 1 | 67.78  |
| 316 | 3_WT.nd2 | 4 | 71 | 16627 | 1 | 65.52  |
| 317 | 3_WT.nd2 | 4 | 72 | 21343 | 1 | 77.82  |
| 318 | 3_WT.nd2 | 4 | 73 | 17767 | 1 | 154.02 |
| 319 | 3_WT.nd2 | 4 | 74 | 23967 | 1 | 23.77  |
| 320 | 3_WT.nd2 | 4 | 75 | 29805 | 1 | 20.52  |
| 321 | 3_WT.nd2 | 4 | 76 | 23330 | 1 | 19.8   |
| 322 | 3_WT.nd2 | 4 | 77 | 21153 | 1 | 21.47  |
| 323 | 3_WT.nd2 | 4 | 78 | 40725 | 2 | 35.23  |
| 324 | 3_WT.nd2 | 4 | 79 | 19133 | 1 | 43.29  |
| 325 | 3_WT.nd2 | 4 | 80 | 33090 | 2 | 31.4   |
| 326 | 3_WT.nd2 | 4 | 81 | 26900 | 1 | 35.06  |
| 327 | 3_WT.nd2 | 5 | 1  | 21024 | 1 | 41.11  |
| 328 | 3_WT.nd2 | 5 | 2  | 33042 | 2 | 21.02  |
| 329 | 3_WT.nd2 | 5 | 3  | 19282 | 1 | 19     |
| 330 | 3_WT.nd2 | 5 | 4  | 39960 | 2 | 16.64  |
| 331 | 3_WT.nd2 | 5 | 5  | 24312 | 1 | 20.25  |
| 332 | 3_WT.nd2 | 5 | 6  | 17418 | 1 | 0      |
| 333 | 3_WT.nd2 | 5 | 7  | 16269 | 1 | 36.12  |
| 334 | 3_WT.nd2 | 5 | 8  | 16019 | 1 | 50     |
| 335 | 3_WT.nd2 | 5 | 9  | 16968 | 1 | 24.02  |
| 336 | 3_WT.nd2 | 5 | 10 | 17414 | 1 | 44.55  |
| 337 | 3_WT.nd2 | 5 | 11 | 19244 | 1 | 68.68  |
| 338 | 3_WT.nd2 | 5 | 12 | 20527 | 1 | 109.77 |
| 339 | 3_WT.nd2 | 5 | 13 | 17896 | 1 | 10.3   |
| 340 | 3_WT.nd2 | 5 | 14 | 17398 | 1 | 93.81  |
| 341 | 3_WT.nd2 | 5 | 15 | 36204 | 2 | 59.91  |
| 342 | 3_WT.nd2 | 5 | 16 | 40454 | 2 | 54.71  |
| 343 | 3_WT.nd2 | 5 | 17 | 67003 | 3 | 40.52  |

|     |          |   |    |       |   |        |
|-----|----------|---|----|-------|---|--------|
| 344 | 3_WT.nd2 | 5 | 18 | 88598 | 4 | 29.43  |
| 345 | 3_WT.nd2 | 5 | 19 | 17518 | 1 | 99.54  |
| 346 | 3_WT.nd2 | 5 | 20 | 61904 | 3 | 23     |
| 347 | 3_WT.nd2 | 5 | 21 | 53967 | 3 | 17     |
| 348 | 3_WT.nd2 | 5 | 22 | 34213 | 2 | 13     |
| 349 | 3_WT.nd2 | 5 | 23 | 22814 | 1 | 9      |
| 350 | 3_WT.nd2 | 5 | 24 | 17571 | 1 | 103.28 |
| 351 | 3_WT.nd2 | 5 | 25 | 37075 | 2 | 3      |
| 352 | 3_WT.nd2 | 5 | 26 | 29364 | 1 | 0      |
| 353 | 3_WT.nd2 | 5 | 27 | 19688 | 1 | 0      |
| 354 | 3_WT.nd2 | 5 | 28 | 20692 | 1 | 0      |
| 355 | 3_WT.nd2 | 5 | 29 | 43988 | 2 | 31     |
| 356 | 3_WT.nd2 | 5 | 30 | 19448 | 1 | 13     |
| 357 | 3_WT.nd2 | 5 | 31 | 28560 | 1 | 39.01  |
| 358 | 3_WT.nd2 | 5 | 32 | 18429 | 1 | 4      |
| 359 | 3_WT.nd2 | 5 | 33 | 22191 | 1 | 22.2   |
| 360 | 3_WT.nd2 | 5 | 34 | 18741 | 1 | 62.77  |
| 361 | 3_WT.nd2 | 5 | 35 | 19659 | 1 | 72.14  |
| 362 | 3_WT.nd2 | 5 | 36 | 21883 | 1 | 45.54  |
| 363 | 3_WT.nd2 | 5 | 37 | 16626 | 1 | 75.8   |
| 364 | 3_WT.nd2 | 5 | 38 | 23151 | 1 | 50.25  |
| 365 | 3_WT.nd2 | 5 | 39 | 21652 | 1 | 39.81  |
| 366 | 3_WT.nd2 | 5 | 40 | 24078 | 1 | 29.55  |
| 367 | 3_WT.nd2 | 5 | 41 | 18879 | 1 | 43.05  |
| 368 | 3_WT.nd2 | 5 | 42 | 18114 | 1 | 38.29  |
| 369 | 3_WT.nd2 | 5 | 43 | 20334 | 1 | 40.22  |
| 370 | 3_WT.nd2 | 5 | 44 | 34958 | 2 | 42.43  |
| 371 | 3_WT.nd2 | 5 | 45 | 22227 | 1 | 46.52  |
| 372 | 3_WT.nd2 | 5 | 46 | 19409 | 1 | 41.18  |
| 373 | 3_WT.nd2 | 5 | 47 | 18329 | 1 | 59.2   |
| 374 | 3_WT.nd2 | 5 | 48 | 23167 | 1 | 43.74  |
| 375 | 3_WT.nd2 | 5 | 49 | 72045 | 4 | 34.13  |
| 376 | 3_WT.nd2 | 5 | 50 | 17948 | 1 | 60     |
| 377 | 3_WT.nd2 | 5 | 51 | 24878 | 1 | 19     |
| 378 | 3_WT.nd2 | 5 | 52 | 21811 | 1 | 15.65  |
| 379 | 3_WT.nd2 | 5 | 53 | 18375 | 1 | 33.53  |
| 380 | 3_WT.nd2 | 5 | 54 | 20660 | 1 | 64     |
| 381 | 3_WT.nd2 | 5 | 55 | 25278 | 1 | 99.62  |
| 382 | 3_WT.nd2 | 5 | 56 | 25213 | 1 | 26.83  |
| 383 | 3_WT.nd2 | 5 | 57 | 25692 | 1 | 100.58 |
| 384 | 3_WT.nd2 | 5 | 58 | 58182 | 3 | 100.66 |
| 385 | 3_WT.nd2 | 5 | 59 | 17531 | 1 | 97.58  |
| 386 | 3_WT.nd2 | 5 | 60 | 42347 | 2 | 64.03  |

|     |          |   |     |        |   |       |
|-----|----------|---|-----|--------|---|-------|
| 387 | 3_WT.nd2 | 5 | 61  | 20455  | 1 | 53.91 |
| 388 | 3_WT.nd2 | 5 | 62  | 54843  | 3 | 80.5  |
| 389 | 3_WT.nd2 | 5 | 63  | 104539 | 5 | 86.15 |
| 390 | 3_WT.nd2 | 5 | 64  | 73165  | 4 | 94.01 |
| 391 | 3_WT.nd2 | 5 | 65  | 41073  | 2 | 0     |
| 392 | 3_WT.nd2 | 5 | 66  | 71860  | 4 | 93.94 |
| 393 | 3_WT.nd2 | 5 | 67  | 61382  | 3 | 3.61  |
| 394 | 3_WT.nd2 | 5 | 68  | 21615  | 1 | 0     |
| 395 | 3_WT.nd2 | 5 | 69  | 135485 | 7 | 87.66 |
| 396 | 3_WT.nd2 | 5 | 70  | 19232  | 1 | 22.63 |
| 397 | 3_WT.nd2 | 5 | 71  | 136910 | 7 | 83.38 |
| 398 | 3_WT.nd2 | 5 | 72  | 127824 | 6 | 79.4  |
| 399 | 3_WT.nd2 | 5 | 73  | 17906  | 1 | 15.03 |
| 400 | 3_WT.nd2 | 5 | 74  | 35970  | 2 | 74.04 |
| 401 | 3_WT.nd2 | 5 | 75  | 16502  | 1 | 24.35 |
| 402 | 3_WT.nd2 | 5 | 76  | 84148  | 4 | 76.49 |
| 403 | 3_WT.nd2 | 5 | 77  | 20882  | 1 | 34.93 |
| 404 | 3_WT.nd2 | 5 | 78  | 109241 | 5 | 75.43 |
| 405 | 3_WT.nd2 | 5 | 79  | 18109  | 1 | 43    |
| 406 | 3_WT.nd2 | 5 | 80  | 38804  | 2 | 76.16 |
| 407 | 3_WT.nd2 | 5 | 81  | 21657  | 1 | 78.01 |
| 408 | 3_WT.nd2 | 5 | 82  | 24864  | 1 | 84.96 |
| 409 | 3_WT.nd2 | 5 | 83  | 22501  | 1 | 49.58 |
| 410 | 3_WT.nd2 | 5 | 84  | 27501  | 1 | 70.46 |
| 411 | 3_WT.nd2 | 5 | 85  | 21733  | 1 | 63.01 |
| 412 | 3_WT.nd2 | 5 | 86  | 25479  | 1 | 68.01 |
| 413 | 3_WT.nd2 | 5 | 87  | 19113  | 1 | 53.74 |
| 414 | 3_WT.nd2 | 5 | 88  | 18043  | 1 | 67.19 |
| 415 | 3_WT.nd2 | 5 | 89  | 78436  | 4 | 52.01 |
| 416 | 3_WT.nd2 | 5 | 90  | 21800  | 1 | 58.67 |
| 417 | 3_WT.nd2 | 5 | 91  | 105221 | 5 | 46    |
| 418 | 3_WT.nd2 | 5 | 92  | 17764  | 1 | 75.29 |
| 419 | 3_WT.nd2 | 5 | 93  | 90997  | 5 | 28.79 |
| 420 | 3_WT.nd2 | 5 | 94  | 40580  | 2 | 43.17 |
| 421 | 3_WT.nd2 | 5 | 95  | 90619  | 5 | 40.05 |
| 422 | 3_WT.nd2 | 5 | 96  | 18561  | 1 | 68.62 |
| 423 | 3_WT.nd2 | 5 | 97  | 18178  | 1 | 64.78 |
| 424 | 3_WT.nd2 | 5 | 98  | 46413  | 2 | 39.4  |
| 425 | 3_WT.nd2 | 5 | 99  | 95107  | 5 | 34.01 |
| 426 | 3_WT.nd2 | 5 | 100 | 91025  | 5 | 29.02 |
| 427 | 3_WT.nd2 | 5 | 101 | 41338  | 2 | 31.58 |
| 428 | 3_WT.nd2 | 5 | 102 | 18190  | 1 | 53.37 |
| 429 | 3_WT.nd2 | 5 | 103 | 108581 | 5 | 23.35 |

|     |          |   |     |        |   |        |
|-----|----------|---|-----|--------|---|--------|
| 430 | 3_WT.nd2 | 5 | 104 | 42459  | 2 | 72.92  |
| 431 | 3_WT.nd2 | 5 | 105 | 102694 | 5 | 10     |
| 432 | 3_WT.nd2 | 5 | 106 | 150897 | 8 | 16.28  |
| 433 | 3_WT.nd2 | 5 | 107 | 61777  | 3 | 69.53  |
| 434 | 3_WT.nd2 | 5 | 108 | 90619  | 5 | 16.97  |
| 435 | 3_WT.nd2 | 5 | 109 | 18109  | 1 | 81.88  |
| 436 | 3_WT.nd2 | 5 | 110 | 35522  | 2 | 10.44  |
| 437 | 3_WT.nd2 | 5 | 111 | 87904  | 4 | 14.56  |
| 438 | 3_WT.nd2 | 5 | 112 | 113094 | 6 | 10.2   |
| 439 | 3_WT.nd2 | 5 | 113 | 32656  | 2 | 15.03  |
| 440 | 3_WT.nd2 | 5 | 114 | 107366 | 5 | 5.66   |
| 441 | 3_WT.nd2 | 5 | 115 | 69266  | 3 | 21.63  |
| 442 | 3_WT.nd2 | 5 | 116 | 150604 | 7 | 7      |
| 443 | 3_WT.nd2 | 5 | 117 | 52984  | 3 | 2.24   |
| 444 | 3_WT.nd2 | 5 | 118 | 38065  | 2 | 1      |
| 445 | 3_WT.nd2 | 5 | 119 | 184959 | 9 | 4.47   |
| 446 | 3_WT.nd2 | 5 | 120 | 39577  | 2 | 1.41   |
| 447 | 3_WT.nd2 | 5 | 121 | 43580  | 2 | 59.62  |
| 448 | 3_WT.nd2 | 5 | 122 | 52417  | 3 | 7      |
| 449 | 3_WT.nd2 | 5 | 123 | 185871 | 9 | 12.53  |
| 450 | 3_WT.nd2 | 5 | 124 | 22234  | 1 | 41.05  |
| 451 | 3_WT.nd2 | 5 | 125 | 46120  | 2 | 0      |
| 452 | 3_WT.nd2 | 5 | 126 | 74416  | 4 | 2      |
| 453 | 3_WT.nd2 | 5 | 127 | 99709  | 5 | 6.71   |
| 454 | 3_WT.nd2 | 5 | 128 | 60104  | 3 | 5.66   |
| 455 | 3_WT.nd2 | 5 | 129 | 72851  | 4 | 24.35  |
| 456 | 3_WT.nd2 | 5 | 130 | 103690 | 5 | 12.81  |
| 457 | 3_WT.nd2 | 5 | 131 | 34097  | 2 | 69.46  |
| 458 | 3_WT.nd2 | 5 | 132 | 18890  | 1 | 77.62  |
| 459 | 3_WT.nd2 | 5 | 133 | 19770  | 1 | 66.48  |
| 460 | 3_WT.nd2 | 5 | 134 | 20945  | 1 | 65.46  |
| 461 | 3_WT.nd2 | 5 | 135 | 17404  | 1 | 63.03  |
| 462 | 3_WT.nd2 | 5 | 136 | 17297  | 1 | 69.08  |
| 463 | 3_WT.nd2 | 5 | 137 | 20006  | 1 | 57.31  |
| 464 | 3_WT.nd2 | 5 | 138 | 18201  | 1 | 68.43  |
| 465 | 3_WT.nd2 | 5 | 139 | 20598  | 1 | 44.28  |
| 466 | 3_WT.nd2 | 5 | 140 | 17104  | 1 | 80.65  |
| 467 | 3_WT.nd2 | 5 | 141 | 21049  | 1 | 86     |
| 468 | 3_WT.nd2 | 5 | 142 | 20409  | 1 | 30.02  |
| 469 | 3_WT.nd2 | 5 | 143 | 18183  | 1 | 13.04  |
| 470 | 3_WT.nd2 | 5 | 144 | 39900  | 2 | 6.32   |
| 471 | 3_WT.nd2 | 5 | 145 | 16622  | 1 | 123.07 |
| 472 | 3_WT.nd2 | 5 | 146 | 88628  | 4 | 5      |

|     |          |   |     |       |   |        |
|-----|----------|---|-----|-------|---|--------|
| 473 | 3_WT.nd2 | 5 | 147 | 19890 | 1 | 18     |
| 474 | 3_WT.nd2 | 6 | 1   | 20946 | 1 | 31.05  |
| 475 | 3_WT.nd2 | 6 | 2   | 53873 | 3 | 23.02  |
| 476 | 3_WT.nd2 | 6 | 3   | 19144 | 1 | 19.8   |
| 477 | 3_WT.nd2 | 6 | 4   | 20988 | 1 | 228.27 |
| 478 | 3_WT.nd2 | 6 | 5   | 17101 | 1 | 42.95  |
| 479 | 3_WT.nd2 | 6 | 6   | 16929 | 1 | 31.02  |
| 480 | 3_WT.nd2 | 6 | 7   | 15855 | 1 | 204.83 |
| 481 | 3_WT.nd2 | 6 | 8   | 18779 | 1 | 193.31 |
| 482 | 3_WT.nd2 | 6 | 9   | 16386 | 1 | 65.49  |
| 483 | 3_WT.nd2 | 6 | 10  | 16267 | 1 | 28.46  |
| 484 | 3_WT.nd2 | 6 | 11  | 16697 | 1 | 95.82  |
| 485 | 3_WT.nd2 | 6 | 12  | 16124 | 1 | 14.21  |
| 486 | 3_WT.nd2 | 6 | 13  | 18403 | 1 | 23.02  |
| 487 | 3_WT.nd2 | 6 | 14  | 74102 | 4 | 60.22  |
| 488 | 3_WT.nd2 | 6 | 15  | 17330 | 1 | 96.57  |
| 489 | 3_WT.nd2 | 6 | 16  | 36601 | 2 | 54.2   |
| 490 | 3_WT.nd2 | 6 | 17  | 56277 | 3 | 32.28  |
| 491 | 3_WT.nd2 | 6 | 18  | 42590 | 2 | 28.86  |
| 492 | 3_WT.nd2 | 6 | 19  | 46759 | 2 | 22.09  |
| 493 | 3_WT.nd2 | 6 | 20  | 49824 | 2 | 15.13  |
| 494 | 3_WT.nd2 | 6 | 21  | 45228 | 2 | 9.43   |
| 495 | 3_WT.nd2 | 6 | 22  | 66086 | 3 | 7.81   |
| 496 | 3_WT.nd2 | 6 | 23  | 31358 | 2 | 0      |
| 497 | 3_WT.nd2 | 6 | 24  | 21440 | 1 | 2      |
| 498 | 3_WT.nd2 | 6 | 25  | 37630 | 2 | 18     |
| 499 | 3_WT.nd2 | 6 | 26  | 22129 | 1 | 2.24   |
| 500 | 3_WT.nd2 | 6 | 27  | 26052 | 1 | 71     |
| 501 | 3_WT.nd2 | 6 | 28  | 19547 | 1 | 88.41  |
| 502 | 3_WT.nd2 | 6 | 29  | 49875 | 2 | 4.47   |
| 503 | 3_WT.nd2 | 6 | 30  | 17582 | 1 | 70.03  |
| 504 | 3_WT.nd2 | 6 | 31  | 22647 | 1 | 5.66   |
| 505 | 3_WT.nd2 | 6 | 32  | 31959 | 2 | 59.14  |
| 506 | 3_WT.nd2 | 6 | 33  | 16141 | 1 | 62.24  |
| 507 | 3_WT.nd2 | 6 | 34  | 18722 | 1 | 19.7   |
| 508 | 3_WT.nd2 | 6 | 35  | 35105 | 2 | 22.85  |
| 509 | 3_WT.nd2 | 6 | 36  | 20945 | 1 | 55.95  |
| 510 | 3_WT.nd2 | 6 | 37  | 18310 | 1 | 54.12  |
| 511 | 3_WT.nd2 | 6 | 38  | 24085 | 1 | 51.61  |
| 512 | 3_WT.nd2 | 6 | 39  | 18648 | 1 | 47.76  |
| 513 | 3_WT.nd2 | 6 | 40  | 21774 | 1 | 39.56  |
| 514 | 3_WT.nd2 | 6 | 41  | 20288 | 1 | 52.04  |
| 515 | 3_WT.nd2 | 6 | 42  | 16693 | 1 | 20.62  |



|     |          |   |    |        |   |       |
|-----|----------|---|----|--------|---|-------|
| 516 | 3_WT.nd2 | 6 | 43 | 42799  | 2 | 25.08 |
| 517 | 3_WT.nd2 | 6 | 44 | 18566  | 1 | 99.85 |
| 518 | 3_WT.nd2 | 6 | 45 | 17604  | 1 | 91.59 |
| 519 | 3_WT.nd2 | 6 | 46 | 15274  | 1 | 71.11 |
| 520 | 3_WT.nd2 | 6 | 47 | 17457  | 1 | 57.98 |
| 521 | 3_WT.nd2 | 6 | 48 | 19614  | 1 | 37.12 |
| 522 | 3_WT.nd2 | 6 | 49 | 27137  | 1 | 57.14 |
| 523 | 3_WT.nd2 | 6 | 50 | 76015  | 4 | 13.04 |
| 524 | 3_WT.nd2 | 6 | 51 | 59023  | 3 | 18.36 |
| 525 | 3_WT.nd2 | 6 | 52 | 34733  | 2 | 30.87 |
| 526 | 3_WT.nd2 | 6 | 53 | 34911  | 2 | 54.92 |
| 527 | 3_WT.nd2 | 6 | 54 | 30317  | 2 | 58.86 |
| 528 | 3_WT.nd2 | 6 | 55 | 21152  | 1 | 0     |
| 529 | 3_WT.nd2 | 6 | 56 | 18029  | 1 | 54.04 |
| 530 | 3_WT.nd2 | 6 | 57 | 19593  | 1 | 64.82 |
| 531 | 3_WT.nd2 | 6 | 58 | 30820  | 2 | 6.71  |
| 532 | 3_WT.nd2 | 6 | 59 | 20420  | 1 | 54.67 |
| 533 | 3_WT.nd2 | 6 | 60 | 109856 | 5 | 0     |
| 534 | 3_WT.nd2 | 6 | 61 | 17737  | 1 | 29.61 |
| 535 | 3_WT.nd2 | 6 | 62 | 173360 | 9 | 0     |
| 536 | 3_WT.nd2 | 6 | 63 | 51103  | 3 | 29.07 |
| 537 | 3_WT.nd2 | 6 | 64 | 19207  | 1 | 57.01 |
| 538 | 3_WT.nd2 | 6 | 65 | 19204  | 1 | 0     |
| 539 | 3_WT.nd2 | 6 | 66 | 115227 | 6 | 5.66  |
| 540 | 3_WT.nd2 | 6 | 67 | 22172  | 1 | 55.11 |
| 541 | 3_WT.nd2 | 6 | 68 | 80319  | 4 | 10.3  |
| 542 | 3_WT.nd2 | 6 | 69 | 112856 | 6 | 15.26 |
| 543 | 3_WT.nd2 | 6 | 70 | 17131  | 1 | 64.13 |
| 544 | 3_WT.nd2 | 6 | 71 | 187203 | 9 | 19.7  |
| 545 | 3_WT.nd2 | 6 | 72 | 26547  | 1 | 10.63 |
| 546 | 3_WT.nd2 | 6 | 73 | 27036  | 1 | 75.96 |
| 547 | 3_WT.nd2 | 6 | 74 | 28444  | 1 | 13.89 |
| 548 | 3_WT.nd2 | 6 | 75 | 20378  | 1 | 31.83 |
| 549 | 3_WT.nd2 | 6 | 76 | 96477  | 5 | 29.53 |
| 550 | 3_WT.nd2 | 6 | 77 | 113110 | 6 | 36.06 |
| 551 | 3_WT.nd2 | 6 | 78 | 45397  | 2 | 41.76 |
| 552 | 3_WT.nd2 | 6 | 79 | 41913  | 2 | 31.83 |
| 553 | 3_WT.nd2 | 6 | 80 | 25027  | 1 | 54    |
| 554 | 3_WT.nd2 | 6 | 81 | 23298  | 1 | 43.28 |
| 555 | 3_WT.nd2 | 6 | 82 | 18774  | 1 | 90.03 |
| 556 | 3_WT.nd2 | 6 | 83 | 20556  | 1 | 56.59 |
| 557 | 3_WT.nd2 | 6 | 84 | 21103  | 1 | 94.92 |
| 558 | 3_WT.nd2 | 6 | 85 | 18616  | 1 | 40.61 |

|     |          |   |     |        |    |        |
|-----|----------|---|-----|--------|----|--------|
| 559 | 3_WT.nd2 | 6 | 86  | 25242  | 1  | 63.41  |
| 560 | 3_WT.nd2 | 6 | 87  | 17881  | 1  | 112.49 |
| 561 | 3_WT.nd2 | 6 | 88  | 91119  | 5  | 60.41  |
| 562 | 3_WT.nd2 | 6 | 89  | 31351  | 2  | 58     |
| 563 | 3_WT.nd2 | 6 | 90  | 17371  | 1  | 65.55  |
| 564 | 3_WT.nd2 | 6 | 91  | 19615  | 1  | 57.8   |
| 565 | 3_WT.nd2 | 6 | 92  | 93050  | 5  | 52.09  |
| 566 | 3_WT.nd2 | 6 | 93  | 137767 | 7  | 41     |
| 567 | 3_WT.nd2 | 6 | 94  | 191702 | 10 | 41.01  |
| 568 | 3_WT.nd2 | 6 | 95  | 173473 | 9  | 28.02  |
| 569 | 3_WT.nd2 | 6 | 96  | 70068  | 3  | 28     |
| 570 | 3_WT.nd2 | 6 | 97  | 30006  | 1  | 22.36  |
| 571 | 3_WT.nd2 | 6 | 98  | 122579 | 6  | 23     |
| 572 | 3_WT.nd2 | 6 | 99  | 217253 | 11 | 12.17  |
| 573 | 3_WT.nd2 | 6 | 100 | 86970  | 4  | 15     |
| 574 | 3_WT.nd2 | 6 | 101 | 53612  | 3  | 16     |
| 575 | 3_WT.nd2 | 6 | 102 | 74906  | 4  | 17.69  |
| 576 | 3_WT.nd2 | 6 | 103 | 18269  | 1  | 5.83   |
| 577 | 3_WT.nd2 | 6 | 104 | 81985  | 4  | 15.52  |
| 578 | 3_WT.nd2 | 6 | 105 | 87591  | 4  | 13     |
| 579 | 3_WT.nd2 | 6 | 106 | 118619 | 6  | 8.54   |
| 580 | 3_WT.nd2 | 6 | 107 | 120855 | 6  | 5      |
| 581 | 3_WT.nd2 | 6 | 108 | 66242  | 3  | 9.85   |
| 582 | 3_WT.nd2 | 6 | 109 | 40519  | 2  | 33.94  |
| 583 | 3_WT.nd2 | 6 | 110 | 107432 | 5  | 3.61   |
| 584 | 3_WT.nd2 | 6 | 111 | 54701  | 3  | 4.12   |
| 585 | 3_WT.nd2 | 6 | 112 | 41778  | 2  | 13     |
| 586 | 3_WT.nd2 | 6 | 113 | 69427  | 3  | 0      |
| 587 | 3_WT.nd2 | 6 | 114 | 71610  | 4  | 4      |
| 588 | 3_WT.nd2 | 6 | 115 | 62116  | 3  | 14     |
| 589 | 3_WT.nd2 | 6 | 116 | 66091  | 3  | 21     |
| 590 | 3_WT.nd2 | 6 | 117 | 32299  | 2  | 55.87  |
| 591 | 3_WT.nd2 | 6 | 118 | 103155 | 5  | 6.08   |
| 592 | 3_WT.nd2 | 6 | 119 | 189619 | 9  | 14.32  |
| 593 | 3_WT.nd2 | 6 | 120 | 19541  | 1  | 32.02  |
| 594 | 3_WT.nd2 | 6 | 121 | 58106  | 3  | 2.83   |
| 595 | 3_WT.nd2 | 6 | 122 | 22188  | 1  | 2      |
| 596 | 3_WT.nd2 | 6 | 123 | 32991  | 2  | 23.54  |
| 597 | 3_WT.nd2 | 6 | 124 | 26122  | 1  | 28.86  |
| 598 | 3_WT.nd2 | 6 | 125 | 21954  | 1  | 34.44  |
| 599 | 3_WT.nd2 | 6 | 126 | 20014  | 1  | 60.73  |
| 600 | 3_WT.nd2 | 6 | 127 | 20286  | 1  | 108.23 |
| 601 | 3_WT.nd2 | 6 | 128 | 27696  | 1  | 63.6   |

|     |          |   |     |        |   |       |
|-----|----------|---|-----|--------|---|-------|
| 602 | 3_WT.nd2 | 6 | 129 | 20744  | 1 | 82.01 |
| 603 | 3_WT.nd2 | 6 | 130 | 19389  | 1 | 68.95 |
| 604 | 3_WT.nd2 | 6 | 131 | 17980  | 1 | 73.35 |
| 605 | 3_WT.nd2 | 6 | 132 | 28389  | 1 | 66.12 |
| 606 | 3_WT.nd2 | 6 | 133 | 27747  | 1 | 74.85 |
| 607 | 3_WT.nd2 | 6 | 134 | 23017  | 1 | 75.64 |
| 608 | 3_WT.nd2 | 6 | 135 | 68084  | 3 | 69.87 |
| 609 | 3_WT.nd2 | 6 | 136 | 20948  | 1 | 31.4  |
| 610 | 3_WT.nd2 | 6 | 137 | 17375  | 1 | 74.63 |
| 611 | 3_WT.nd2 | 6 | 138 | 17975  | 1 | 84.91 |
| 612 | 3_WT.nd2 | 6 | 139 | 19861  | 1 | 70.34 |
| 613 | 3_WT.nd2 | 6 | 140 | 19382  | 1 | 85.01 |
| 614 | 3_WT.nd2 | 6 | 141 | 18144  | 1 | 21.21 |
| 615 | 3_WT.nd2 | 6 | 142 | 19576  | 1 | 9.06  |
| 616 | 3_WT.nd2 | 6 | 143 | 26841  | 1 | 26    |
| 617 | 3_WT.nd2 | 6 | 144 | 20134  | 1 | 4.12  |
| 618 | 3_WT.nd2 | 7 | 1   | 17624  | 1 | 94.13 |
| 619 | 3_WT.nd2 | 7 | 2   | 19983  | 1 | 23    |
| 620 | 3_WT.nd2 | 7 | 3   | 31014  | 2 | 94.73 |
| 621 | 3_WT.nd2 | 7 | 4   | 19608  | 1 | 37.22 |
| 622 | 3_WT.nd2 | 7 | 5   | 57825  | 3 | 21.59 |
| 623 | 3_WT.nd2 | 7 | 6   | 19295  | 1 | 51.48 |
| 624 | 3_WT.nd2 | 7 | 7   | 17463  | 1 | 66.75 |
| 625 | 3_WT.nd2 | 7 | 8   | 21482  | 1 | 62.29 |
| 626 | 3_WT.nd2 | 7 | 9   | 17142  | 1 | 56.92 |
| 627 | 3_WT.nd2 | 7 | 10  | 18564  | 1 | 72.01 |
| 628 | 3_WT.nd2 | 7 | 11  | 24955  | 1 | 17.49 |
| 629 | 3_WT.nd2 | 7 | 12  | 24542  | 1 | 56.08 |
| 630 | 3_WT.nd2 | 7 | 13  | 24103  | 1 | 28.64 |
| 631 | 3_WT.nd2 | 7 | 14  | 16714  | 1 | 69.35 |
| 632 | 3_WT.nd2 | 7 | 15  | 17960  | 1 | 50.92 |
| 633 | 3_WT.nd2 | 7 | 16  | 67406  | 3 | 2     |
| 634 | 3_WT.nd2 | 7 | 17  | 18560  | 1 | 10.3  |
| 635 | 3_WT.nd2 | 7 | 18  | 94597  | 5 | 1.41  |
| 636 | 3_WT.nd2 | 7 | 19  | 99689  | 5 | 5     |
| 637 | 3_WT.nd2 | 7 | 20  | 20495  | 1 | 56    |
| 638 | 3_WT.nd2 | 7 | 21  | 87189  | 4 | 10    |
| 639 | 3_WT.nd2 | 7 | 22  | 19985  | 1 | 84.2  |
| 640 | 3_WT.nd2 | 7 | 23  | 125040 | 6 | 13.93 |
| 641 | 3_WT.nd2 | 7 | 24  | 45809  | 2 | 14.04 |
| 642 | 3_WT.nd2 | 7 | 25  | 111103 | 6 | 14    |
| 643 | 3_WT.nd2 | 7 | 26  | 19268  | 1 | 5.39  |
| 644 | 3_WT.nd2 | 7 | 27  | 17924  | 1 | 77.83 |

|     |          |   |    |        |   |        |
|-----|----------|---|----|--------|---|--------|
| 645 | 3_WT.nd2 | 7 | 28 | 18279  | 1 | 83.49  |
| 646 | 3_WT.nd2 | 7 | 29 | 112305 | 6 | 11.18  |
| 647 | 3_WT.nd2 | 7 | 30 | 19228  | 1 | 21.93  |
| 648 | 3_WT.nd2 | 7 | 31 | 17182  | 1 | 52.89  |
| 649 | 3_WT.nd2 | 7 | 32 | 63582  | 3 | 9.43   |
| 650 | 3_WT.nd2 | 7 | 33 | 106782 | 5 | 9.22   |
| 651 | 3_WT.nd2 | 7 | 34 | 19452  | 1 | 56.59  |
| 652 | 3_WT.nd2 | 7 | 35 | 127057 | 6 | 12.65  |
| 653 | 3_WT.nd2 | 7 | 36 | 34473  | 2 | 43.83  |
| 654 | 3_WT.nd2 | 7 | 37 | 20941  | 1 | 62.48  |
| 655 | 3_WT.nd2 | 7 | 38 | 98747  | 5 | 16.55  |
| 656 | 3_WT.nd2 | 7 | 39 | 23844  | 1 | 36.4   |
| 657 | 3_WT.nd2 | 7 | 40 | 65482  | 3 | 21.19  |
| 658 | 3_WT.nd2 | 7 | 41 | 83284  | 4 | 27.46  |
| 659 | 3_WT.nd2 | 7 | 42 | 65509  | 3 | 34.06  |
| 660 | 3_WT.nd2 | 7 | 43 | 32254  | 2 | 38.05  |
| 661 | 3_WT.nd2 | 7 | 44 | 40063  | 2 | 43.68  |
| 662 | 3_WT.nd2 | 7 | 45 | 22943  | 1 | 60.03  |
| 663 | 3_WT.nd2 | 7 | 46 | 27060  | 1 | 46.01  |
| 664 | 3_WT.nd2 | 7 | 47 | 42703  | 2 | 0      |
| 665 | 3_WT.nd2 | 7 | 48 | 42781  | 2 | 39.56  |
| 666 | 3_WT.nd2 | 7 | 49 | 21415  | 1 | 37.58  |
| 667 | 3_WT.nd2 | 7 | 50 | 40763  | 2 | 0      |
| 668 | 3_WT.nd2 | 7 | 51 | 31862  | 2 | 41     |
| 669 | 3_WT.nd2 | 7 | 52 | 32676  | 2 | 37.01  |
| 670 | 3_WT.nd2 | 7 | 53 | 63744  | 3 | 33.06  |
| 671 | 3_WT.nd2 | 7 | 54 | 33573  | 2 | 48.7   |
| 672 | 3_WT.nd2 | 7 | 55 | 26290  | 1 | 26.93  |
| 673 | 3_WT.nd2 | 7 | 56 | 20375  | 1 | 22.83  |
| 674 | 3_WT.nd2 | 7 | 57 | 26511  | 1 | 19.1   |
| 675 | 3_WT.nd2 | 7 | 58 | 22772  | 1 | 18.38  |
| 676 | 3_WT.nd2 | 7 | 59 | 22196  | 1 | 22.83  |
| 677 | 3_WT.nd2 | 7 | 60 | 94146  | 5 | 21.02  |
| 678 | 3_WT.nd2 | 7 | 61 | 35628  | 2 | 42.58  |
| 679 | 3_WT.nd2 | 7 | 62 | 25450  | 1 | 86.31  |
| 680 | 3_WT.nd2 | 7 | 63 | 35612  | 2 | 84.85  |
| 681 | 3_WT.nd2 | 7 | 64 | 21459  | 1 | 18.38  |
| 682 | 3_WT.nd2 | 7 | 65 | 36971  | 2 | 58.05  |
| 683 | 3_WT.nd2 | 7 | 66 | 36546  | 2 | 119.64 |
| 684 | 3_WT.nd2 | 7 | 67 | 20535  | 1 | 110.34 |
| 685 | 3_WT.nd2 | 7 | 68 | 26760  | 1 | 65.19  |
| 686 | 3_WT.nd2 | 7 | 69 | 25535  | 1 | 108.46 |
| 687 | 3_WT.nd2 | 7 | 70 | 33241  | 2 | 43.14  |

|     |          |   |     |        |   |        |
|-----|----------|---|-----|--------|---|--------|
| 688 | 3_WT.nd2 | 7 | 71  | 66588  | 3 | 60.21  |
| 689 | 3_WT.nd2 | 7 | 72  | 19090  | 1 | 48.88  |
| 690 | 3_WT.nd2 | 7 | 73  | 50254  | 3 | 57.56  |
| 691 | 3_WT.nd2 | 7 | 74  | 36072  | 2 | 34.71  |
| 692 | 3_WT.nd2 | 7 | 75  | 26313  | 1 | 12     |
| 693 | 3_WT.nd2 | 7 | 76  | 17943  | 1 | 19.42  |
| 694 | 3_WT.nd2 | 7 | 77  | 35115  | 2 | 8.25   |
| 695 | 3_WT.nd2 | 7 | 78  | 28269  | 1 | 27.46  |
| 696 | 3_WT.nd2 | 7 | 79  | 55406  | 3 | 27.59  |
| 697 | 3_WT.nd2 | 7 | 80  | 29344  | 1 | 8.6    |
| 698 | 3_WT.nd2 | 7 | 81  | 19582  | 1 | 30     |
| 699 | 3_WT.nd2 | 7 | 82  | 32284  | 2 | 68.59  |
| 700 | 3_WT.nd2 | 7 | 83  | 49778  | 2 | 34.66  |
| 701 | 3_WT.nd2 | 7 | 84  | 33314  | 2 | 19.92  |
| 702 | 3_WT.nd2 | 7 | 85  | 36475  | 2 | 23.35  |
| 703 | 3_WT.nd2 | 7 | 86  | 66058  | 3 | 27.29  |
| 704 | 3_WT.nd2 | 7 | 87  | 22688  | 1 | 23.19  |
| 705 | 3_WT.nd2 | 7 | 88  | 18370  | 1 | 65.31  |
| 706 | 3_WT.nd2 | 7 | 89  | 57131  | 3 | 57.22  |
| 707 | 3_WT.nd2 | 7 | 90  | 20416  | 1 | 5.83   |
| 708 | 3_WT.nd2 | 7 | 91  | 22712  | 1 | 13.42  |
| 709 | 3_WT.nd2 | 7 | 92  | 26220  | 1 | 43.97  |
| 710 | 3_WT.nd2 | 7 | 93  | 37421  | 2 | 39.81  |
| 711 | 3_WT.nd2 | 7 | 94  | 22609  | 1 | 38.42  |
| 712 | 3_WT.nd2 | 7 | 95  | 21252  | 1 | 38.83  |
| 713 | 3_WT.nd2 | 7 | 96  | 25536  | 1 | 40.31  |
| 714 | 3_WT.nd2 | 7 | 97  | 23596  | 1 | 45.65  |
| 715 | 3_WT.nd2 | 7 | 98  | 54949  | 3 | 38.95  |
| 716 | 3_WT.nd2 | 7 | 99  | 23739  | 1 | 43.57  |
| 717 | 3_WT.nd2 | 7 | 100 | 91434  | 5 | 33.29  |
| 718 | 3_WT.nd2 | 7 | 101 | 67314  | 3 | 17.03  |
| 719 | 3_WT.nd2 | 7 | 102 | 109317 | 5 | 11.18  |
| 720 | 3_WT.nd2 | 7 | 103 | 39433  | 2 | 31.62  |
| 721 | 3_WT.nd2 | 7 | 104 | 57868  | 3 | 14.14  |
| 722 | 3_WT.nd2 | 7 | 105 | 18383  | 1 | 49.09  |
| 723 | 3_WT.nd2 | 7 | 106 | 54946  | 3 | 12.37  |
| 724 | 3_WT.nd2 | 7 | 107 | 22606  | 1 | 16.64  |
| 725 | 3_WT.nd2 | 7 | 108 | 61775  | 3 | 22.09  |
| 726 | 3_WT.nd2 | 7 | 109 | 16220  | 1 | 68.88  |
| 727 | 3_WT.nd2 | 7 | 110 | 31793  | 2 | 152.86 |
| 728 | 3_WT.nd2 | 7 | 111 | 19894  | 1 | 97.42  |
| 729 | 3_WT.nd2 | 7 | 112 | 18543  | 1 | 159.15 |
| 730 | 3_WT.nd2 | 8 | 1   | 23494  | 1 | 190.38 |

|     |          |   |    |        |    |        |
|-----|----------|---|----|--------|----|--------|
| 731 | 3_WT.nd2 | 8 | 2  | 28223  | 1  | 156    |
| 732 | 3_WT.nd2 | 8 | 3  | 21008  | 1  | 155.82 |
| 733 | 3_WT.nd2 | 8 | 4  | 21186  | 1  | 154.38 |
| 734 | 3_WT.nd2 | 8 | 5  | 17867  | 1  | 126.61 |
| 735 | 3_WT.nd2 | 8 | 6  | 79503  | 4  | 73.01  |
| 736 | 3_WT.nd2 | 8 | 7  | 106399 | 5  | 55.22  |
| 737 | 3_WT.nd2 | 8 | 8  | 37087  | 2  | 44.94  |
| 738 | 3_WT.nd2 | 8 | 9  | 24232  | 1  | 52.01  |
| 739 | 3_WT.nd2 | 8 | 10 | 19956  | 1  | 124.79 |
| 740 | 3_WT.nd2 | 8 | 11 | 98948  | 5  | 41.4   |
| 741 | 3_WT.nd2 | 8 | 12 | 117336 | 6  | 31.24  |
| 742 | 3_WT.nd2 | 8 | 13 | 76125  | 4  | 36.8   |
| 743 | 3_WT.nd2 | 8 | 14 | 97095  | 5  | 21.93  |
| 744 | 3_WT.nd2 | 8 | 15 | 156164 | 8  | 14.87  |
| 745 | 3_WT.nd2 | 8 | 16 | 150301 | 7  | 11.31  |
| 746 | 3_WT.nd2 | 8 | 17 | 304075 | 15 | 14.87  |
| 747 | 3_WT.nd2 | 8 | 18 | 61573  | 3  | 3      |
| 748 | 3_WT.nd2 | 8 | 19 | 117225 | 6  | 4.47   |
| 749 | 3_WT.nd2 | 8 | 20 | 460455 | 23 | 5.83   |
| 750 | 3_WT.nd2 | 8 | 21 | 87780  | 4  | 1      |
| 751 | 3_WT.nd2 | 8 | 22 | 18272  | 1  | 41.59  |
| 752 | 3_WT.nd2 | 8 | 23 | 148187 | 7  | 0      |
| 753 | 3_WT.nd2 | 8 | 24 | 177371 | 9  | 0      |
| 754 | 3_WT.nd2 | 8 | 25 | 346238 | 17 | 5      |
| 755 | 3_WT.nd2 | 8 | 26 | 38832  | 2  | 0      |
| 756 | 3_WT.nd2 | 8 | 27 | 171864 | 9  | 0      |
| 757 | 3_WT.nd2 | 8 | 28 | 40016  | 2  | 47.17  |
| 758 | 3_WT.nd2 | 8 | 29 | 199016 | 10 | 14.04  |
| 759 | 3_WT.nd2 | 8 | 30 | 119531 | 6  | 39     |
| 760 | 3_WT.nd2 | 8 | 31 | 107062 | 5  | 16.03  |
| 761 | 3_WT.nd2 | 8 | 32 | 55354  | 3  | 29     |
| 762 | 3_WT.nd2 | 8 | 33 | 59289  | 3  | 35     |
| 763 | 3_WT.nd2 | 8 | 34 | 122974 | 6  | 22.2   |
| 764 | 3_WT.nd2 | 8 | 35 | 20453  | 1  | 45.88  |
| 765 | 3_WT.nd2 | 8 | 36 | 33957  | 2  | 14.21  |
| 766 | 3_WT.nd2 | 8 | 37 | 46847  | 2  | 8.49   |
| 767 | 3_WT.nd2 | 8 | 38 | 52802  | 3  | 7      |
| 768 | 3_WT.nd2 | 8 | 39 | 20243  | 1  | 116.02 |
| 769 | 3_WT.nd2 | 8 | 40 | 40157  | 2  | 5      |
| 770 | 3_WT.nd2 | 8 | 41 | 78525  | 4  | 2.24   |
| 771 | 3_WT.nd2 | 8 | 42 | 18683  | 1  | 55.95  |
| 772 | 3_WT.nd2 | 8 | 43 | 18521  | 1  | 106.48 |
| 773 | 3_WT.nd2 | 8 | 44 | 21596  | 1  | 100.58 |

|     |          |   |    |        |    |        |
|-----|----------|---|----|--------|----|--------|
| 774 | 3_WT.nd2 | 8 | 45 | 19404  | 1  | 28.23  |
| 775 | 3_WT.nd2 | 8 | 46 | 46824  | 2  | 81.84  |
| 776 | 3_WT.nd2 | 8 | 47 | 18118  | 1  | 58.26  |
| 777 | 3_WT.nd2 | 8 | 48 | 17216  | 1  | 56.6   |
| 778 | 3_WT.nd2 | 8 | 49 | 18130  | 1  | 96.13  |
| 779 | 3_WT.nd2 | 8 | 50 | 18075  | 1  | 114.95 |
| 780 | 3_WT.nd2 | 8 | 51 | 27492  | 1  | 83.01  |
| 781 | 3_WT.nd2 | 8 | 52 | 18252  | 1  | 99.86  |
| 782 | 3_WT.nd2 | 8 | 53 | 19936  | 1  | 39.82  |
| 783 | 3_WT.nd2 | 8 | 54 | 90600  | 5  | 104.81 |
| 784 | 3_WT.nd2 | 8 | 55 | 215546 | 11 | 98.6   |
| 785 | 3_WT.nd2 | 8 | 56 | 65722  | 3  | 83.44  |
| 786 | 3_WT.nd2 | 8 | 57 | 42564  | 2  | 118.51 |
| 787 | 3_WT.nd2 | 8 | 58 | 156620 | 8  | 92.85  |
| 788 | 3_WT.nd2 | 8 | 59 | 52293  | 3  | 88.41  |
| 789 | 3_WT.nd2 | 8 | 60 | 471289 | 23 | 67.62  |
| 790 | 3_WT.nd2 | 8 | 61 | 111110 | 6  | 82.46  |
| 791 | 3_WT.nd2 | 8 | 62 | 88953  | 4  | 80     |
| 792 | 3_WT.nd2 | 8 | 63 | 60201  | 3  | 92.63  |
| 793 | 3_WT.nd2 | 8 | 64 | 90267  | 4  | 89.83  |
| 794 | 3_WT.nd2 | 8 | 65 | 88143  | 4  | 85.8   |
| 795 | 3_WT.nd2 | 8 | 66 | 91694  | 5  | 210.77 |
| 796 | 3_WT.nd2 | 8 | 67 | 18413  | 1  | 146.58 |
| 797 | 3_WT.nd2 | 8 | 68 | 19963  | 1  | 111.89 |
| 798 | 3_WT.nd2 | 8 | 69 | 32751  | 2  | 186.39 |
| 799 | 3_WT.nd2 | 9 | 1  | 27132  | 1  | 155.12 |
| 800 | 3_WT.nd2 | 9 | 2  | 51074  | 3  | 106.44 |
| 801 | 3_WT.nd2 | 9 | 3  | 43219  | 2  | 82.49  |
| 802 | 3_WT.nd2 | 9 | 4  | 17729  | 1  | 106.1  |
| 803 | 3_WT.nd2 | 9 | 5  | 36676  | 2  | 82.38  |
| 804 | 3_WT.nd2 | 9 | 6  | 31180  | 2  | 76.48  |
| 805 | 3_WT.nd2 | 9 | 7  | 80405  | 4  | 71.59  |
| 806 | 3_WT.nd2 | 9 | 8  | 61789  | 3  | 67.74  |
| 807 | 3_WT.nd2 | 9 | 9  | 55030  | 3  | 58.83  |
| 808 | 3_WT.nd2 | 9 | 10 | 90133  | 4  | 50.54  |
| 809 | 3_WT.nd2 | 9 | 11 | 17977  | 1  | 15     |
| 810 | 3_WT.nd2 | 9 | 12 | 34741  | 2  | 55.8   |
| 811 | 3_WT.nd2 | 9 | 13 | 20994  | 1  | 49.24  |
| 812 | 3_WT.nd2 | 9 | 14 | 20736  | 1  | 46.32  |
| 813 | 3_WT.nd2 | 9 | 15 | 143503 | 7  | 20     |
| 814 | 3_WT.nd2 | 9 | 16 | 84218  | 4  | 14.76  |
| 815 | 3_WT.nd2 | 9 | 17 | 130564 | 6  | 11.18  |
| 816 | 3_WT.nd2 | 9 | 18 | 263295 | 13 | 7.07   |

|     |          |   |    |        |    |        |
|-----|----------|---|----|--------|----|--------|
| 817 | 3_WT.nd2 | 9 | 19 | 186866 | 9  | 25     |
| 818 | 3_WT.nd2 | 9 | 20 | 245659 | 12 | 19.42  |
| 819 | 3_WT.nd2 | 9 | 21 | 295342 | 15 | 8.6    |
| 820 | 3_WT.nd2 | 9 | 22 | 160238 | 8  | 0      |
| 821 | 3_WT.nd2 | 9 | 23 | 135376 | 7  | 12     |
| 822 | 3_WT.nd2 | 9 | 24 | 226870 | 11 | 0      |
| 823 | 3_WT.nd2 | 9 | 25 | 131806 | 7  | 2      |
| 824 | 3_WT.nd2 | 9 | 26 | 56788  | 3  | 20.02  |
| 825 | 3_WT.nd2 | 9 | 27 | 168490 | 8  | 6      |
| 826 | 3_WT.nd2 | 9 | 28 | 128525 | 6  | 26.93  |
| 827 | 3_WT.nd2 | 9 | 29 | 66642  | 3  | 15     |
| 828 | 3_WT.nd2 | 9 | 30 | 49431  | 2  | 22     |
| 829 | 3_WT.nd2 | 9 | 31 | 106318 | 5  | 0      |
| 830 | 3_WT.nd2 | 9 | 32 | 140209 | 7  | 32.14  |
| 831 | 3_WT.nd2 | 9 | 33 | 69853  | 3  | 23     |
| 832 | 3_WT.nd2 | 9 | 34 | 22653  | 1  | 46.67  |
| 833 | 3_WT.nd2 | 9 | 35 | 65006  | 3  | 24.02  |
| 834 | 3_WT.nd2 | 9 | 36 | 206518 | 10 | 39.46  |
| 835 | 3_WT.nd2 | 9 | 37 | 76672  | 4  | 45.54  |
| 836 | 3_WT.nd2 | 9 | 38 | 70441  | 4  | 30.89  |
| 837 | 3_WT.nd2 | 9 | 39 | 25108  | 1  | 40.85  |
| 838 | 3_WT.nd2 | 9 | 40 | 57490  | 3  | 24.6   |
| 839 | 3_WT.nd2 | 9 | 41 | 32196  | 2  | 67.74  |
| 840 | 3_WT.nd2 | 9 | 42 | 34807  | 2  | 28.79  |
| 841 | 3_WT.nd2 | 9 | 43 | 58480  | 3  | 5.39   |
| 842 | 3_WT.nd2 | 9 | 44 | 50586  | 3  | 14.56  |
| 843 | 3_WT.nd2 | 9 | 45 | 61550  | 3  | 6      |
| 844 | 3_WT.nd2 | 9 | 46 | 80900  | 4  | 2.24   |
| 845 | 3_WT.nd2 | 9 | 47 | 52005  | 3  | 58.14  |
| 846 | 3_WT.nd2 | 9 | 48 | 45093  | 2  | 0      |
| 847 | 3_WT.nd2 | 9 | 49 | 26407  | 1  | 8.49   |
| 848 | 3_WT.nd2 | 9 | 50 | 17124  | 1  | 10     |
| 849 | 3_WT.nd2 | 9 | 51 | 24367  | 1  | 103.94 |
| 850 | 3_WT.nd2 | 9 | 52 | 39786  | 2  | 14.76  |
| 851 | 3_WT.nd2 | 9 | 53 | 20845  | 1  | 77.28  |
| 852 | 3_WT.nd2 | 9 | 54 | 71304  | 4  | 16.49  |
| 853 | 3_WT.nd2 | 9 | 55 | 42766  | 2  | 19.24  |
| 854 | 3_WT.nd2 | 9 | 56 | 42676  | 2  | 21.54  |
| 855 | 3_WT.nd2 | 9 | 57 | 29816  | 1  | 25.06  |
| 856 | 3_WT.nd2 | 9 | 58 | 20477  | 1  | 39.81  |
| 857 | 3_WT.nd2 | 9 | 59 | 21782  | 1  | 88.09  |
| 858 | 3_WT.nd2 | 9 | 60 | 18104  | 1  | 83.45  |
| 859 | 3_WT.nd2 | 9 | 61 | 18711  | 1  | 119.24 |



|     |          |   |     |        |    |        |
|-----|----------|---|-----|--------|----|--------|
| 860 | 3_WT.nd2 | 9 | 62  | 16961  | 1  | 93.6   |
| 861 | 3_WT.nd2 | 9 | 63  | 20287  | 1  | 157.69 |
| 862 | 3_WT.nd2 | 9 | 64  | 19030  | 1  | 132.85 |
| 863 | 3_WT.nd2 | 9 | 65  | 17848  | 1  | 135.6  |
| 864 | 3_WT.nd2 | 9 | 66  | 17667  | 1  | 109.48 |
| 865 | 3_WT.nd2 | 9 | 67  | 18300  | 1  | 90.35  |
| 866 | 3_WT.nd2 | 9 | 68  | 21287  | 1  | 58.82  |
| 867 | 3_WT.nd2 | 9 | 69  | 141645 | 7  | 80.99  |
| 868 | 3_WT.nd2 | 9 | 70  | 22835  | 1  | 76.12  |
| 869 | 3_WT.nd2 | 9 | 71  | 32382  | 2  | 42.2   |
| 870 | 3_WT.nd2 | 9 | 72  | 21382  | 1  | 95.43  |
| 871 | 3_WT.nd2 | 9 | 73  | 19430  | 1  | 40     |
| 872 | 3_WT.nd2 | 9 | 74  | 96521  | 5  | 29.15  |
| 873 | 3_WT.nd2 | 9 | 75  | 16716  | 1  | 72.4   |
| 874 | 3_WT.nd2 | 9 | 76  | 20695  | 1  | 67.08  |
| 875 | 3_WT.nd2 | 9 | 77  | 249728 | 12 | 8      |
| 876 | 3_WT.nd2 | 9 | 78  | 16650  | 1  | 72.95  |
| 877 | 3_WT.nd2 | 9 | 79  | 156511 | 8  | 33.54  |
| 878 | 3_WT.nd2 | 9 | 80  | 21570  | 1  | 11.66  |
| 879 | 3_WT.nd2 | 9 | 81  | 18364  | 1  | 49.58  |
| 880 | 3_WT.nd2 | 9 | 82  | 34035  | 2  | 0      |
| 881 | 3_WT.nd2 | 9 | 83  | 26320  | 1  | 14.14  |
| 882 | 3_WT.nd2 | 9 | 84  | 29542  | 1  | 29.12  |
| 883 | 3_WT.nd2 | 9 | 85  | 24833  | 1  | 33.84  |
| 884 | 3_WT.nd2 | 9 | 86  | 84187  | 4  | 34.41  |
| 885 | 3_WT.nd2 | 9 | 87  | 24192  | 1  | 45.22  |
| 886 | 3_WT.nd2 | 9 | 88  | 97264  | 5  | 22.83  |
| 887 | 3_WT.nd2 | 9 | 89  | 29294  | 1  | 104.48 |
| 888 | 3_WT.nd2 | 9 | 90  | 40936  | 2  | 110.29 |
| 889 | 3_WT.nd2 | 9 | 91  | 16473  | 1  | 138.13 |
| 890 | 3_WT.nd2 | 9 | 92  | 18558  | 1  | 55.03  |
| 891 | 3_WT.nd2 | 9 | 93  | 20818  | 1  | 11.05  |
| 892 | 3_WT.nd2 | 9 | 94  | 16860  | 1  | 152.16 |
| 893 | 3_WT.nd2 | 9 | 95  | 35299  | 2  | 4.47   |
| 894 | 3_WT.nd2 | 9 | 96  | 68925  | 3  | 5.1    |
| 895 | 3_WT.nd2 | 9 | 97  | 31215  | 2  | 28.07  |
| 896 | 3_WT.nd2 | 9 | 98  | 66056  | 3  | 13     |
| 897 | 3_WT.nd2 | 9 | 99  | 18054  | 1  | 22.09  |
| 898 | 3_WT.nd2 | 9 | 100 | 50378  | 3  | 23.77  |
| 899 | 3_WT.nd2 | 9 | 101 | 25708  | 1  | 28.16  |
| 900 | 3_WT.nd2 | 9 | 102 | 41328  | 2  | 27.29  |
| 901 | 3_WT.nd2 | 9 | 103 | 189844 | 9  | 0      |
| 902 | 3_WT.nd2 | 9 | 104 | 45658  | 2  | 22.83  |

|     |          |    |     |        |    |        |
|-----|----------|----|-----|--------|----|--------|
| 903 | 3_WT.nd2 | 9  | 105 | 23607  | 1  | 162.11 |
| 904 | 3_WT.nd2 | 9  | 106 | 41052  | 2  | 35.69  |
| 905 | 3_WT.nd2 | 9  | 107 | 154288 | 8  | 15.3   |
| 906 | 3_WT.nd2 | 9  | 108 | 19976  | 1  | 13.04  |
| 907 | 3_WT.nd2 | 9  | 109 | 73661  | 4  | 16     |
| 908 | 3_WT.nd2 | 9  | 110 | 133807 | 7  | 2.24   |
| 909 | 3_WT.nd2 | 9  | 111 | 265055 | 13 | 8      |
| 910 | 3_WT.nd2 | 9  | 112 | 66587  | 3  | 25.5   |
| 911 | 3_WT.nd2 | 9  | 113 | 328852 | 16 | 15.23  |
| 912 | 3_WT.nd2 | 9  | 114 | 275054 | 14 | 37.85  |
| 913 | 3_WT.nd2 | 9  | 115 | 253018 | 13 | 24.74  |
| 914 | 3_WT.nd2 | 9  | 116 | 168222 | 8  | 44.41  |
| 915 | 3_WT.nd2 | 9  | 117 | 248947 | 12 | 30.81  |
| 916 | 3_WT.nd2 | 9  | 118 | 178121 | 9  | 49.5   |
| 917 | 3_WT.nd2 | 9  | 119 | 234227 | 12 | 72.34  |
| 918 | 3_WT.nd2 | 9  | 120 | 177317 | 9  | 66.48  |
| 919 | 3_WT.nd2 | 9  | 121 | 17070  | 1  | 117.2  |
| 920 | 3_WT.nd2 | 9  | 122 | 165677 | 8  | 61.81  |
| 921 | 3_WT.nd2 | 9  | 123 | 136093 | 7  | 56.89  |
| 922 | 3_WT.nd2 | 9  | 124 | 77974  | 4  | 0      |
| 923 | 3_WT.nd2 | 9  | 125 | 64755  | 3  | 79.76  |
| 924 | 3_WT.nd2 | 9  | 126 | 71356  | 4  | 87.69  |
| 925 | 3_WT.nd2 | 9  | 127 | 89659  | 4  | 4.12   |
| 926 | 3_WT.nd2 | 9  | 128 | 28754  | 1  | 85.16  |
| 927 | 3_WT.nd2 | 9  | 129 | 186165 | 9  | 9.43   |
| 928 | 3_WT.nd2 | 9  | 130 | 21150  | 1  | 42.05  |
| 929 | 3_WT.nd2 | 9  | 131 | 21035  | 1  | 38.18  |
| 930 | 3_WT.nd2 | 9  | 132 | 26968  | 1  | 87.42  |
| 931 | 3_WT.nd2 | 10 | 1   | 15430  | 1  | 1      |
| 932 | 3_WT.nd2 | 10 | 2   | 16396  | 1  | 108.23 |
| 933 | 3_WT.nd2 | 10 | 3   | 16730  | 1  | 14.42  |
| 934 | 3_WT.nd2 | 10 | 4   | 23075  | 1  | 17     |
| 935 | 3_WT.nd2 | 10 | 5   | 19272  | 1  | 53.15  |
| 936 | 3_WT.nd2 | 10 | 6   | 131276 | 7  | 48.01  |
| 937 | 3_WT.nd2 | 10 | 7   | 75792  | 4  | 54.71  |
| 938 | 3_WT.nd2 | 10 | 8   | 16428  | 1  | 76.49  |
| 939 | 3_WT.nd2 | 10 | 9   | 19800  | 1  | 103.12 |
| 940 | 3_WT.nd2 | 10 | 10  | 17266  | 1  | 16.97  |
| 941 | 3_WT.nd2 | 10 | 11  | 16704  | 1  | 69.18  |
| 942 | 3_WT.nd2 | 10 | 12  | 21191  | 1  | 42.76  |
| 943 | 3_WT.nd2 | 10 | 13  | 19846  | 1  | 47.3   |
| 944 | 3_WT.nd2 | 10 | 14  | 37711  | 2  | 18.44  |
| 945 | 3_WT.nd2 | 10 | 15  | 30777  | 2  | 18.36  |

|     |          |    |    |        |   |        |
|-----|----------|----|----|--------|---|--------|
| 946 | 3_WT.nd2 | 10 | 16 | 39214  | 2 | 20     |
| 947 | 3_WT.nd2 | 10 | 17 | 20468  | 1 | 31.62  |
| 948 | 3_WT.nd2 | 10 | 18 | 30753  | 2 | 153.39 |
| 949 | 3_WT.nd2 | 10 | 19 | 37094  | 2 | 147.22 |
| 950 | 3_WT.nd2 | 10 | 20 | 15774  | 1 | 63.79  |
| 951 | 3_WT.nd2 | 10 | 21 | 16338  | 1 | 144.12 |
| 952 | 3_WT.nd2 | 10 | 22 | 20241  | 1 | 111.52 |
| 953 | 3_WT.nd2 | 10 | 23 | 22140  | 1 | 53.85  |
| 954 | 3_WT.nd2 | 10 | 24 | 24087  | 1 | 65.46  |
| 955 | 3_WT.nd2 | 10 | 25 | 37272  | 2 | 47.41  |
| 956 | 3_WT.nd2 | 10 | 26 | 22475  | 1 | 133.63 |
| 957 | 3_WT.nd2 | 10 | 27 | 23397  | 1 | 59.24  |
| 958 | 3_WT.nd2 | 10 | 28 | 31898  | 2 | 73.68  |
| 959 | 3_WT.nd2 | 10 | 29 | 35875  | 2 | 128.39 |
| 960 | 3_WT.nd2 | 10 | 30 | 28131  | 1 | 45.49  |
| 961 | 3_WT.nd2 | 10 | 31 | 73278  | 4 | 127.02 |
| 962 | 3_WT.nd2 | 10 | 32 | 23172  | 1 | 126.57 |
| 963 | 3_WT.nd2 | 10 | 33 | 22686  | 1 | 124.1  |
| 964 | 3_WT.nd2 | 10 | 34 | 28680  | 1 | 46.75  |
| 965 | 3_WT.nd2 | 10 | 35 | 31800  | 2 | 117.27 |
| 966 | 3_WT.nd2 | 10 | 36 | 16453  | 1 | 116.97 |
| 967 | 3_WT.nd2 | 10 | 37 | 34387  | 2 | 113.16 |
| 968 | 3_WT.nd2 | 10 | 38 | 16011  | 1 | 65.19  |
| 969 | 3_WT.nd2 | 10 | 39 | 20128  | 1 | 112.97 |
| 970 | 3_WT.nd2 | 10 | 40 | 26934  | 1 | 111.22 |
| 971 | 3_WT.nd2 | 10 | 41 | 16212  | 1 | 109.88 |
| 972 | 3_WT.nd2 | 10 | 42 | 19636  | 1 | 105.23 |
| 973 | 3_WT.nd2 | 10 | 43 | 95299  | 5 | 25.5   |
| 974 | 3_WT.nd2 | 10 | 44 | 21548  | 1 | 73.55  |
| 975 | 3_WT.nd2 | 10 | 45 | 24319  | 1 | 72.17  |
| 976 | 3_WT.nd2 | 10 | 46 | 72849  | 4 | 16.55  |
| 977 | 3_WT.nd2 | 10 | 47 | 16664  | 1 | 59     |
| 978 | 3_WT.nd2 | 10 | 48 | 118796 | 6 | 13.6   |
| 979 | 3_WT.nd2 | 10 | 49 | 109102 | 5 | 16.12  |
| 980 | 3_WT.nd2 | 10 | 50 | 20440  | 1 | 55.97  |
| 981 | 3_WT.nd2 | 10 | 51 | 19687  | 1 | 47.68  |
| 982 | 3_WT.nd2 | 10 | 52 | 48450  | 2 | 21.21  |
| 983 | 3_WT.nd2 | 10 | 53 | 18031  | 1 | 61.01  |
| 984 | 3_WT.nd2 | 10 | 54 | 31344  | 2 | 24     |
| 985 | 3_WT.nd2 | 10 | 55 | 94148  | 5 | 0      |
| 986 | 3_WT.nd2 | 10 | 56 | 18955  | 1 | 46.62  |
| 987 | 3_WT.nd2 | 10 | 57 | 32739  | 2 | 29.43  |
| 988 | 3_WT.nd2 | 10 | 58 | 21833  | 1 | 46.1   |

|      |          |    |    |       |   |        |
|------|----------|----|----|-------|---|--------|
| 989  | 3_WT.nd2 | 10 | 59 | 19510 | 1 | 52.77  |
| 990  | 3_WT.nd2 | 10 | 60 | 19854 | 1 | 53.81  |
| 991  | 3_WT.nd2 | 10 | 61 | 43938 | 2 | 65.8   |
| 992  | 3_WT.nd2 | 10 | 62 | 55234 | 3 | 62.43  |
| 993  | 3_WT.nd2 | 10 | 63 | 26652 | 1 | 72.86  |
| 994  | 3_WT.nd2 | 10 | 64 | 26184 | 1 | 72.25  |
| 995  | 3_WT.nd2 | 10 | 65 | 46981 | 2 | 68.1   |
| 996  | 3_WT.nd2 | 10 | 66 | 21247 | 1 | 9.9    |
| 997  | 3_WT.nd2 | 10 | 67 | 41825 | 2 | 5.39   |
| 998  | 3_WT.nd2 | 10 | 68 | 20057 | 1 | 5      |
| 999  | 3_WT.nd2 | 10 | 69 | 38359 | 2 | 37.7   |
| 1000 | 3_WT.nd2 | 10 | 70 | 51469 | 3 | 44.72  |
| 1001 | 3_WT.nd2 | 10 | 71 | 25267 | 1 | 27.66  |
| 1002 | 3_WT.nd2 | 10 | 72 | 22781 | 1 | 17.46  |
| 1003 | 3_WT.nd2 | 10 | 73 | 19040 | 1 | 78.79  |
| 1004 | 3_WT.nd2 | 10 | 74 | 19104 | 1 | 84.38  |
| 1005 | 3_WT.nd2 | 10 | 75 | 18943 | 1 | 50.09  |
| 1006 | 3_WT.nd2 | 10 | 76 | 17952 | 1 | 42.15  |
| 1007 | 3_WT.nd2 | 10 | 77 | 17533 | 1 | 98.41  |
| 1008 | 3_WT.nd2 | 10 | 78 | 19210 | 1 | 87.21  |
| 1009 | 3_WT.nd2 | 10 | 79 | 20168 | 1 | 94.43  |
| 1010 | 3_WT.nd2 | 10 | 80 | 18857 | 1 | 93.38  |
| 1011 | 3_WT.nd2 | 10 | 81 | 26914 | 1 | 100.17 |
| 1012 | 3_WT.nd2 | 10 | 82 | 17533 | 1 | 142.76 |
| 1013 | 3_WT.nd2 | 10 | 83 | 16417 | 1 | 102.62 |
| 1014 | 3_WT.nd2 | 10 | 84 | 19026 | 1 | 80.06  |
| 1015 | 3_WT.nd2 | 10 | 85 | 19857 | 1 | 85.62  |
| 1016 | 3_WT.nd2 | 10 | 86 | 25251 | 1 | 96.6   |
| 1017 | 3_WT.nd2 | 11 | 1  | 16597 | 1 | 158.26 |
| 1018 | 3_WT.nd2 | 11 | 2  | 27899 | 1 | 73.55  |
| 1019 | 3_WT.nd2 | 11 | 3  | 18884 | 1 | 1.41   |
| 1020 | 3_WT.nd2 | 11 | 4  | 19951 | 1 | 4.12   |
| 1021 | 3_WT.nd2 | 11 | 5  | 40578 | 2 | 33.96  |
| 1022 | 3_WT.nd2 | 11 | 6  | 25818 | 1 | 39.29  |
| 1023 | 3_WT.nd2 | 11 | 7  | 20292 | 1 | 55.11  |
| 1024 | 3_WT.nd2 | 11 | 8  | 20525 | 1 | 48.76  |
| 1025 | 3_WT.nd2 | 11 | 9  | 45448 | 2 | 16.97  |
| 1026 | 3_WT.nd2 | 11 | 10 | 31201 | 2 | 23.32  |
| 1027 | 3_WT.nd2 | 11 | 11 | 26509 | 1 | 42.38  |
| 1028 | 3_WT.nd2 | 11 | 12 | 19883 | 1 | 60.88  |
| 1029 | 3_WT.nd2 | 11 | 13 | 20248 | 1 | 65.73  |
| 1030 | 3_WT.nd2 | 11 | 14 | 37713 | 2 | 16.55  |
| 1031 | 3_WT.nd2 | 11 | 15 | 54258 | 3 | 17.46  |

|      |          |    |    |        |   |        |
|------|----------|----|----|--------|---|--------|
| 1032 | 3_WT.nd2 | 11 | 16 | 80320  | 4 | 22.47  |
| 1033 | 3_WT.nd2 | 11 | 17 | 39331  | 2 | 22     |
| 1034 | 3_WT.nd2 | 11 | 18 | 20321  | 1 | 28.86  |
| 1035 | 3_WT.nd2 | 11 | 19 | 16306  | 1 | 116.46 |
| 1036 | 3_WT.nd2 | 11 | 20 | 21516  | 1 | 162.59 |
| 1037 | 3_WT.nd2 | 11 | 21 | 23561  | 1 | 122.12 |
| 1038 | 3_WT.nd2 | 11 | 22 | 28333  | 1 | 89.99  |
| 1039 | 3_WT.nd2 | 11 | 23 | 37630  | 2 | 78.1   |
| 1040 | 3_WT.nd2 | 11 | 24 | 39350  | 2 | 74     |
| 1041 | 3_WT.nd2 | 11 | 25 | 18331  | 1 | 119.22 |
| 1042 | 3_WT.nd2 | 11 | 26 | 17154  | 1 | 92.96  |
| 1043 | 3_WT.nd2 | 11 | 27 | 45689  | 2 | 59.41  |
| 1044 | 3_WT.nd2 | 11 | 28 | 42927  | 2 | 105.38 |
| 1045 | 3_WT.nd2 | 11 | 29 | 70789  | 4 | 55.15  |
| 1046 | 3_WT.nd2 | 11 | 30 | 17649  | 1 | 126.83 |
| 1047 | 3_WT.nd2 | 11 | 31 | 30833  | 2 | 52     |
| 1048 | 3_WT.nd2 | 11 | 32 | 19170  | 1 | 123    |
| 1049 | 3_WT.nd2 | 11 | 33 | 43946  | 2 | 51.01  |
| 1050 | 3_WT.nd2 | 11 | 34 | 17096  | 1 | 118.22 |
| 1051 | 3_WT.nd2 | 11 | 35 | 35526  | 2 | 44     |
| 1052 | 3_WT.nd2 | 11 | 36 | 19389  | 1 | 89.19  |
| 1053 | 3_WT.nd2 | 11 | 37 | 20303  | 1 | 33.06  |
| 1054 | 3_WT.nd2 | 11 | 38 | 38922  | 2 | 105.42 |
| 1055 | 3_WT.nd2 | 11 | 39 | 36604  | 2 | 28.28  |
| 1056 | 3_WT.nd2 | 11 | 40 | 17892  | 1 | 78.89  |
| 1057 | 3_WT.nd2 | 11 | 41 | 46966  | 2 | 17     |
| 1058 | 3_WT.nd2 | 11 | 42 | 16595  | 1 | 91.93  |
| 1059 | 3_WT.nd2 | 11 | 43 | 72289  | 4 | 15.81  |
| 1060 | 3_WT.nd2 | 11 | 44 | 17358  | 1 | 91.05  |
| 1061 | 3_WT.nd2 | 11 | 45 | 96158  | 5 | 65.44  |
| 1062 | 3_WT.nd2 | 11 | 46 | 66901  | 3 | 21.38  |
| 1063 | 3_WT.nd2 | 11 | 47 | 17712  | 1 | 85.7   |
| 1064 | 3_WT.nd2 | 11 | 48 | 18206  | 1 | 64.38  |
| 1065 | 3_WT.nd2 | 11 | 49 | 35978  | 2 | 70     |
| 1066 | 3_WT.nd2 | 11 | 50 | 24501  | 1 | 31.06  |
| 1067 | 3_WT.nd2 | 11 | 51 | 21231  | 1 | 44.1   |
| 1068 | 3_WT.nd2 | 11 | 52 | 21459  | 1 | 41.23  |
| 1069 | 3_WT.nd2 | 11 | 53 | 110558 | 6 | 15.65  |
| 1070 | 3_WT.nd2 | 11 | 54 | 37909  | 2 | 40.02  |
| 1071 | 3_WT.nd2 | 11 | 55 | 15458  | 1 | 80.06  |
| 1072 | 3_WT.nd2 | 11 | 56 | 16996  | 1 | 77.88  |
| 1073 | 3_WT.nd2 | 11 | 57 | 71219  | 4 | 21.93  |
| 1074 | 3_WT.nd2 | 11 | 58 | 24727  | 1 | 23     |

|      |          |    |     |        |   |        |
|------|----------|----|-----|--------|---|--------|
| 1075 | 3_WT.nd2 | 11 | 59  | 119458 | 6 | 21.84  |
| 1076 | 3_WT.nd2 | 11 | 60  | 17346  | 1 | 36.07  |
| 1077 | 3_WT.nd2 | 11 | 61  | 21606  | 1 | 34.44  |
| 1078 | 3_WT.nd2 | 11 | 62  | 21850  | 1 | 34.44  |
| 1079 | 3_WT.nd2 | 11 | 63  | 43656  | 2 | 10.63  |
| 1080 | 3_WT.nd2 | 11 | 64  | 22274  | 1 | 82.3   |
| 1081 | 3_WT.nd2 | 11 | 65  | 19111  | 1 | 76.06  |
| 1082 | 3_WT.nd2 | 11 | 66  | 19288  | 1 | 50.8   |
| 1083 | 3_WT.nd2 | 11 | 67  | 64768  | 3 | 36.35  |
| 1084 | 3_WT.nd2 | 11 | 68  | 18854  | 1 | 7.28   |
| 1085 | 3_WT.nd2 | 11 | 69  | 17820  | 1 | 75.29  |
| 1086 | 3_WT.nd2 | 11 | 70  | 17352  | 1 | 55.9   |
| 1087 | 3_WT.nd2 | 11 | 71  | 30337  | 2 | 85.33  |
| 1088 | 3_WT.nd2 | 11 | 72  | 64004  | 3 | 18.87  |
| 1089 | 3_WT.nd2 | 11 | 73  | 48296  | 2 | 17.69  |
| 1090 | 3_WT.nd2 | 11 | 74  | 55834  | 3 | 44.78  |
| 1091 | 3_WT.nd2 | 11 | 75  | 32433  | 2 | 95.27  |
| 1092 | 3_WT.nd2 | 11 | 76  | 18192  | 1 | 75.58  |
| 1093 | 3_WT.nd2 | 11 | 77  | 35970  | 2 | 28.28  |
| 1094 | 3_WT.nd2 | 11 | 78  | 17288  | 1 | 72.9   |
| 1095 | 3_WT.nd2 | 11 | 79  | 37501  | 2 | 24.52  |
| 1096 | 3_WT.nd2 | 11 | 80  | 38608  | 2 | 24.02  |
| 1097 | 3_WT.nd2 | 11 | 81  | 18120  | 1 | 85.91  |
| 1098 | 3_WT.nd2 | 11 | 82  | 67292  | 3 | 67.94  |
| 1099 | 3_WT.nd2 | 11 | 83  | 59934  | 3 | 62.63  |
| 1100 | 3_WT.nd2 | 11 | 84  | 21111  | 1 | 38.33  |
| 1101 | 3_WT.nd2 | 11 | 85  | 18337  | 1 | 68.35  |
| 1102 | 3_WT.nd2 | 11 | 86  | 24406  | 1 | 91.55  |
| 1103 | 3_WT.nd2 | 11 | 87  | 15972  | 1 | 63.51  |
| 1104 | 3_WT.nd2 | 11 | 88  | 19011  | 1 | 107.04 |
| 1105 | 3_WT.nd2 | 11 | 89  | 36313  | 2 | 102.77 |
| 1106 | 3_WT.nd2 | 11 | 90  | 17516  | 1 | 92.01  |
| 1107 | 3_WT.nd2 | 11 | 91  | 19771  | 1 | 92.13  |
| 1108 | 3_WT.nd2 | 11 | 92  | 22325  | 1 | 89.07  |
| 1109 | 3_WT.nd2 | 11 | 93  | 50931  | 3 | 24.6   |
| 1110 | 3_WT.nd2 | 11 | 94  | 20986  | 1 | 41.68  |
| 1111 | 3_WT.nd2 | 11 | 95  | 31530  | 2 | 21.63  |
| 1112 | 3_WT.nd2 | 11 | 96  | 19736  | 1 | 74.24  |
| 1113 | 3_WT.nd2 | 11 | 97  | 27405  | 1 | 76.55  |
| 1114 | 3_WT.nd2 | 11 | 98  | 29571  | 1 | 62.39  |
| 1115 | 3_WT.nd2 | 11 | 99  | 16802  | 1 | 71.87  |
| 1116 | 3_WT.nd2 | 11 | 100 | 17698  | 1 | 79.51  |
| 1117 | 3_WT.nd2 | 11 | 101 | 17478  | 1 | 30.02  |

|      |          |    |     |        |    |        |
|------|----------|----|-----|--------|----|--------|
| 1118 | 3_WT.nd2 | 11 | 102 | 18698  | 1  | 39.46  |
| 1119 | 3_WT.nd2 | 11 | 103 | 18376  | 1  | 113.22 |
| 1120 | 3_WT.nd2 | 11 | 104 | 35707  | 2  | 103.31 |
| 1121 | 3_WT.nd2 | 11 | 105 | 19760  | 1  | 66.07  |
| 1122 | 3_WT.nd2 | 11 | 106 | 19803  | 1  | 116.73 |
| 1123 | 3_WT.nd2 | 11 | 107 | 23507  | 1  | 49.37  |
| 1124 | 3_WT.nd2 | 11 | 108 | 18592  | 1  | 74.73  |
| 1125 | 3_WT.nd2 | 11 | 109 | 18100  | 1  | 78.43  |
| 1126 | 3_WT.nd2 | 12 | 1   | 17820  | 1  | 82.73  |
| 1127 | 3_WT.nd2 | 12 | 2   | 17841  | 1  | 133.96 |
| 1128 | 3_WT.nd2 | 12 | 3   | 21120  | 1  | 96.04  |
| 1129 | 3_WT.nd2 | 12 | 4   | 17202  | 1  | 87.97  |
| 1130 | 3_WT.nd2 | 12 | 5   | 22074  | 1  | 62.94  |
| 1131 | 3_WT.nd2 | 12 | 6   | 22333  | 1  | 55.23  |
| 1132 | 3_WT.nd2 | 12 | 7   | 81834  | 4  | 46.23  |
| 1133 | 3_WT.nd2 | 12 | 8   | 53922  | 3  | 45.79  |
| 1134 | 3_WT.nd2 | 12 | 9   | 197502 | 10 | 24.17  |
| 1135 | 3_WT.nd2 | 12 | 10  | 79629  | 4  | 23.54  |
| 1136 | 3_WT.nd2 | 12 | 11  | 31279  | 2  | 25.08  |
| 1137 | 3_WT.nd2 | 12 | 12  | 18685  | 1  | 36.07  |
| 1138 | 3_WT.nd2 | 12 | 13  | 43472  | 2  | 23.09  |
| 1139 | 3_WT.nd2 | 12 | 14  | 35832  | 2  | 7.62   |
| 1140 | 3_WT.nd2 | 12 | 15  | 46988  | 2  | 16.16  |
| 1141 | 3_WT.nd2 | 12 | 16  | 42164  | 2  | 13.89  |
| 1142 | 3_WT.nd2 | 12 | 17  | 27337  | 1  | 11     |
| 1143 | 3_WT.nd2 | 12 | 18  | 19126  | 1  | 2.24   |
| 1144 | 3_WT.nd2 | 12 | 19  | 20676  | 1  | 5      |
| 1145 | 3_WT.nd2 | 12 | 20  | 61836  | 3  | 0      |
| 1146 | 3_WT.nd2 | 12 | 21  | 80514  | 4  | 4      |
| 1147 | 3_WT.nd2 | 12 | 22  | 62484  | 3  | 7.21   |
| 1148 | 3_WT.nd2 | 12 | 23  | 81017  | 4  | 7.07   |
| 1149 | 3_WT.nd2 | 12 | 24  | 33495  | 2  | 12     |
| 1150 | 3_WT.nd2 | 12 | 25  | 70705  | 4  | 14     |
| 1151 | 3_WT.nd2 | 12 | 26  | 60591  | 3  | 11.4   |
| 1152 | 3_WT.nd2 | 12 | 27  | 128941 | 6  | 16.12  |
| 1153 | 3_WT.nd2 | 12 | 28  | 20347  | 1  | 61.98  |
| 1154 | 3_WT.nd2 | 12 | 29  | 61503  | 3  | 38.08  |
| 1155 | 3_WT.nd2 | 12 | 30  | 76224  | 4  | 16.4   |
| 1156 | 3_WT.nd2 | 12 | 31  | 134976 | 7  | 25     |
| 1157 | 3_WT.nd2 | 12 | 32  | 22531  | 1  | 21     |
| 1158 | 3_WT.nd2 | 12 | 33  | 88840  | 4  | 21.38  |
| 1159 | 3_WT.nd2 | 12 | 34  | 138024 | 7  | 24.76  |
| 1160 | 3_WT.nd2 | 12 | 35  | 145724 | 7  | 32.8   |

|      |          |    |    |        |    |        |
|------|----------|----|----|--------|----|--------|
| 1161 | 3_WT.nd2 | 12 | 36 | 72711  | 4  | 27.31  |
| 1162 | 3_WT.nd2 | 12 | 37 | 70638  | 4  | 40.8   |
| 1163 | 3_WT.nd2 | 12 | 38 | 36301  | 2  | 48.83  |
| 1164 | 3_WT.nd2 | 12 | 39 | 87677  | 4  | 38.6   |
| 1165 | 3_WT.nd2 | 12 | 40 | 179885 | 9  | 62.43  |
| 1166 | 3_WT.nd2 | 12 | 41 | 88414  | 4  | 46.23  |
| 1167 | 3_WT.nd2 | 12 | 42 | 43193  | 2  | 54.41  |
| 1168 | 3_WT.nd2 | 12 | 43 | 208421 | 10 | 47.38  |
| 1169 | 3_WT.nd2 | 12 | 44 | 92839  | 5  | 54.56  |
| 1170 | 3_WT.nd2 | 12 | 45 | 89269  | 4  | 63.82  |
| 1171 | 3_WT.nd2 | 12 | 46 | 157761 | 8  | 71.61  |
| 1172 | 3_WT.nd2 | 12 | 47 | 102666 | 5  | 76.28  |
| 1173 | 3_WT.nd2 | 12 | 48 | 84355  | 4  | 85     |
| 1174 | 3_WT.nd2 | 12 | 49 | 98748  | 5  | 69.35  |
| 1175 | 3_WT.nd2 | 12 | 50 | 104091 | 5  | 71.03  |
| 1176 | 3_WT.nd2 | 12 | 51 | 134586 | 7  | 78.82  |
| 1177 | 3_WT.nd2 | 12 | 52 | 95737  | 5  | 62.97  |
| 1178 | 3_WT.nd2 | 12 | 53 | 71208  | 4  | 89.04  |
| 1179 | 3_WT.nd2 | 12 | 54 | 139322 | 7  | 85.45  |
| 1180 | 3_WT.nd2 | 12 | 55 | 169268 | 8  | 82.01  |
| 1181 | 3_WT.nd2 | 12 | 56 | 109957 | 5  | 91.02  |
| 1182 | 3_WT.nd2 | 12 | 57 | 23037  | 1  | 67.42  |
| 1183 | 3_WT.nd2 | 12 | 58 | 27091  | 1  | 115.43 |
| 1184 | 3_WT.nd2 | 12 | 59 | 19162  | 1  | 151.17 |
| 1185 | 3_WT.nd2 | 12 | 60 | 21765  | 1  | 206.87 |
| 1186 | 3_WT.nd2 | 13 | 1  | 16322  | 1  | 13.6   |
| 1187 | 3_WT.nd2 | 13 | 2  | 17626  | 1  | 11.18  |
| 1188 | 3_WT.nd2 | 13 | 3  | 16030  | 1  | 26.48  |
| 1189 | 3_WT.nd2 | 13 | 4  | 19828  | 1  | 125.02 |
| 1190 | 3_WT.nd2 | 13 | 5  | 18619  | 1  | 95.75  |
| 1191 | 3_WT.nd2 | 13 | 6  | 28168  | 1  | 7.62   |
| 1192 | 3_WT.nd2 | 13 | 7  | 37865  | 2  | 2      |
| 1193 | 3_WT.nd2 | 13 | 8  | 19275  | 1  | 16     |
| 1194 | 3_WT.nd2 | 13 | 9  | 22053  | 1  | 33     |
| 1195 | 3_WT.nd2 | 13 | 10 | 19754  | 1  | 41     |
| 1196 | 3_WT.nd2 | 13 | 11 | 18993  | 1  | 41     |
| 1197 | 3_WT.nd2 | 13 | 12 | 18401  | 1  | 35.47  |
| 1198 | 3_WT.nd2 | 13 | 13 | 17673  | 1  | 93.52  |
| 1199 | 3_WT.nd2 | 13 | 14 | 50924  | 3  | 111.13 |
| 1200 | 3_WT.nd2 | 13 | 15 | 21899  | 1  | 89.14  |
| 1201 | 3_WT.nd2 | 13 | 16 | 19980  | 1  | 78     |
| 1202 | 3_WT.nd2 | 13 | 17 | 19670  | 1  | 81.02  |
| 1203 | 3_WT.nd2 | 13 | 18 | 70597  | 4  | 94.64  |



|      |          |    |    |       |   |        |
|------|----------|----|----|-------|---|--------|
| 1204 | 3_WT.nd2 | 13 | 19 | 41143 | 2 | 119.71 |
| 1205 | 3_WT.nd2 | 13 | 20 | 30497 | 2 | 104.09 |
| 1206 | 3_WT.nd2 | 13 | 21 | 23256 | 1 | 124.17 |
| 1207 | 3_WT.nd2 | 13 | 22 | 18364 | 1 | 8.49   |
| 1208 | 3_WT.nd2 | 13 | 23 | 20263 | 1 | 121.6  |
| 1209 | 3_WT.nd2 | 13 | 24 | 19618 | 1 | 54.92  |
| 1210 | 3_WT.nd2 | 13 | 25 | 18301 | 1 | 91.92  |
| 1211 | 3_WT.nd2 | 13 | 26 | 18564 | 1 | 98.08  |
| 1212 | 3_WT.nd2 | 13 | 27 | 37615 | 2 | 26.25  |
| 1213 | 3_WT.nd2 | 13 | 28 | 19997 | 1 | 87     |
| 1214 | 3_WT.nd2 | 13 | 29 | 19717 | 1 | 17.89  |
| 1215 | 3_WT.nd2 | 13 | 30 | 20086 | 1 | 112.11 |
| 1216 | 3_WT.nd2 | 13 | 31 | 18605 | 1 | 69.64  |
| 1217 | 3_WT.nd2 | 13 | 32 | 21655 | 1 | 33.29  |
| 1218 | 3_WT.nd2 | 13 | 33 | 18027 | 1 | 103.94 |
| 1219 | 3_WT.nd2 | 13 | 34 | 21448 | 1 | 69.43  |
| 1220 | 3_WT.nd2 | 13 | 35 | 62814 | 3 | 30.08  |
| 1221 | 3_WT.nd2 | 13 | 36 | 19034 | 1 | 65     |
| 1222 | 3_WT.nd2 | 13 | 37 | 17688 | 1 | 0      |
| 1223 | 3_WT.nd2 | 13 | 38 | 16618 | 1 | 91.98  |
| 1224 | 3_WT.nd2 | 13 | 39 | 24725 | 1 | 7.28   |
| 1225 | 3_WT.nd2 | 13 | 40 | 25809 | 1 | 5.39   |
| 1226 | 3_WT.nd2 | 13 | 41 | 44981 | 2 | 7.28   |

Capsid>Nuc

| <i>Capsid Sum Intensity</i> |                                     |
|-----------------------------|-------------------------------------|
| 0                           |                                     |
| 89                          | Mean 48873.69496                    |
| 0                           | Standard Error 1071.314037          |
| 0                           | Median 25372                        |
| 0                           | Mode 20099                          |
| 0                           | Standard Deviation 66092.34899      |
| 0                           | Sample Variance 4368198595          |
| 0                           | Kurtosis 61.99854079                |
| 0                           | Skewness 6.395294809                |
| 0                           | Range 996908                        |
| 0                           | Minimum 7629                        |
| 0                           | Maximum 1004537                     |
| 0                           | Sum 186013283                       |
| 116.35                      | Count 3806                          |
| 1                           | Confidence Level(95.0%) 2100.405061 |

|        | Est #              | %    | Max # |    |
|--------|--------------------|------|-------|----|
| 0      | Cent Capsids       | 387  | 4.2%  | 14 |
| 0      | Nuc Capsids        | 6887 | 74.9% | 50 |
| 102.22 | Nuc capsids - cent | 6614 | 72.0% | 50 |
| 66.91  | Wayward Capsids    | 2189 | 23.8% | 20 |

26  
58  
0  
10  
0  
6.4  
0  
0  
0  
0  
50.21  
0  
46.32  
0  
0  
0  
0  
0  
67.21  
0

Note: This combined data set of the three WT>WT repeats wa

0  
0  
0  
0  
0  
0  
62.51  
16.64  
0  
0  
0  
0  
0  
0  
0  
3.16  
0  
0  
0  
0  
0  
126.25  
46.52  
0  
0  
4  
0  
17.89  
79.61  
0  
34.93  
0  
73.16  
0  
41.11  
6  
56.72  
13.34  
39.82  
69  
41  
34.71  
11.18

0  
0  
42.06  
40.52  
2.83  
0  
24.04  
0  
19.8  
1  
0  
1  
0  
0  
0  
21.93  
0  
0  
0  
0  
16.55  
19.7  
0  
0  
13  
0  
0  
0  
2.24  
0  
0  
0  
0  
28  
0  
0  
0  
0  
0  
22.02  
17.89  
4.47  
0

15.81  
0  
17  
36.4  
76  
0  
76.55  
0  
48.75  
41.11  
90.43  
42.2  
15.81  
0  
9  
49  
72  
0  
0  
0  
101.14  
98.66  
98.01  
94  
92  
15.26  
0  
0  
0  
0  
0  
0  
0  
37  
4.24  
3.16  
1.41  
2.24  
5  
50.54  
97  
0  
0

0  
44  
0  
56.61  
40.85  
55.08  
0  
8.54  
10.2  
0  
0  
15.65  
12.04  
0  
0  
0  
0  
0  
0  
10.82  
4  
65.39  
0  
0  
0  
0  
0  
0  
77.1  
15.81  
49.65  
0  
0  
50.33  
0  
0  
0  
0  
0  
2  
46.17  
0  
33.73

0  
43.08  
77.18  
85.7  
81.54  
55.47  
65.73  
58.14  
35.61  
52.35  
45.1  
32.53  
39.56  
41.59  
0  
24.17  
0  
0  
0  
0  
66.07  
5  
0  
0  
7  
24.7  
0  
1  
0  
0  
0  
0  
0  
4  
0  
0  
22.47  
0  
0  
0  
0  
0  
14  
22.02

9.85  
0  
42.15  
0  
0  
0  
21.02  
60  
0  
0  
0  
0  
0  
0  
0  
31.89  
13  
28.43  
0  
0  
77.18  
26.17  
0  
26.4  
59.36  
0  
0  
94.02  
28.79  
0  
50.22  
56  
66.24  
38.18  
53  
5  
0  
0  
0  
0  
18.79  
0  
0



0  
0  
46.62  
24  
0  
1  
39.85  
22.14  
0  
16.28  
124.92  
78.57  
0  
99.2  
0  
29.55  
19.72  
28.64  
4.47  
66.41  
74  
0  
0  
0  
0  
0  
0  
13  
0  
0  
93.01  
0  
0  
0  
15.13  
0  
0  
0  
0  
44.6  
0  
0  
0  
0

16.64  
9.85  
0  
20.59  
13.6  
0  
19.85  
0  
32.76  
0  
0  
0  
23.35  
23.02  
0  
0  
0  
11.05  
3.16  
0  
2.24  
0  
0  
33.62  
0  
0  
0  
3.61  
16.28  
31.91  
0  
0  
0  
3.61  
0  
0  
30.41  
0  
23.09  
6  
0  
0  
119.54

0  
28  
19.03  
1.41  
0  
0  
0  
0  
69.31  
0  
103.46  
0  
0  
2  
0  
0  
47.38  
0  
24.76  
0  
52.01  
128.41  
53  
0  
0  
0  
0  
102.08  
136.62  
24  
90  
13.42  
0  
78.03  
0  
0  
15  
19  
7.62  
8.94  
16  
15  
5.83

19.72  
10.77  
0  
105.7  
26.93  
107.42  
51  
121.49  
0  
90.43  
37  
0  
1  
0  
66.03  
0  
0  
0  
0  
0  
15.56  
0  
0  
0  
0  
103.24  
0  
5.83  
49.65  
21.26  
80.06  
21.54  
137.9  
93.94  
55.87  
46.69  
83.74  
55.46  
82.73  
52  
1  
1  
71.06

0  
0  
0  
0  
13.04  
0  
0  
5.1  
76.4  
60.83  
29.27  
0  
57.31  
0  
63.15  
0  
61.13  
19  
0  
66  
7.81  
0  
73  
26  
0  
0  
0  
16  
0  
0  
0  
0  
0  
0  
0  
0  
85.38  
0  
0  
5.83  
32.25  
0  
41.18

22.63  
0  
32.56  
0  
0  
0  
1.41  
0  
0  
0  
17.2  
0  
23.85  
91.27  
0  
0  
0  
22.14  
0  
1  
94.75  
0  
0  
0  
0  
0  
51.4  
0  
0  
107.49  
20  
41.01  
26.02  
0  
0  
0  
0  
40.79  
0  
0  
0  
0  
0

0  
95.8  
72.45  
57.98  
46.23  
28.64  
0  
0  
0  
0  
0  
0  
20  
0  
0  
0  
76.9  
0  
60.83  
0  
25.06  
0  
72.12  
57.98  
52.2  
0  
62.13  
16.64  
19.03  
63  
0  
0  
11.66  
0  
58.59  
0  
0  
0  
0  
67.27  
0  
0  
0

10.3  
85.38  
0  
0  
0  
0  
32.65  
0  
0  
0  
0  
0  
17.69  
4.12  
0  
0  
24.76  
0  
44.82  
0  
85.7  
0  
94.76  
0  
26.83  
14.76  
0  
0  
0  
96.57  
24  
0  
2  
27.07  
0  
0  
46.01  
0  
0  
41  
0  
0  
0







0  
0  
0  
13  
1.41  
0  
69  
18  
29.07  
27.66  
49.25  
72.37  
45.88  
0  
10.05  
0  
0  
39.62  
113.16  
82.73  
120.65  
100.85  
112.36  
102.08  
9  
37.01  
26.91  
89.01  
80.53  
16.97  
15.26  
66.64  
1.41  
73.05  
141.23  
1  
138.6  
6  
119.34  
121.74  
4  
134.62  
94

0  
91  
6.32  
92.63  
19.21  
211.73  
98.37  
20.12  
120.37  
0  
0  
0  
61.27  
0  
0  
12.21  
73.25  
22.02  
30.41  
56.75  
0  
1.41  
37.85  
1  
11.4  
30.81  
0  
40.01  
0  
0  
0  
0  
0  
0  
43.93  
0  
14.04  
0  
0  
0  
0  
0  
0  
0

0  
0  
77.1  
80.21  
48.08  
43.83  
70.71  
15.62  
73.24  
0  
0  
0  
0  
0  
0  
0  
0  
77.67  
0  
0  
0  
0  
0  
0  
0  
15.23  
0  
0  
0  
0  
0  
0  
0  
13  
0  
18.11  
29.53  
27.2  
71.81  
0  
9  
41  
4  
111.77  
101.87

37.8  
89.44  
27.46  
67.54  
16.12  
72.45  
4.12  
135.09  
94  
0  
7.62  
0  
55  
41.11  
0  
0  
0  
0  
46.62  
0  
0  
17.89  
0  
0  
34  
0  
0  
0  
0  
0  
0  
0  
18.68  
0  
0  
0  
0  
0  
42.2  
80.32  
5.1  
0  
9.22

28.43  
13.89  
0  
0  
0  
17.46  
0  
0  
0  
0  
7.62  
0  
0  
49.5  
6  
2  
163.57  
121.81  
10  
41.11  
46.84  
55.04  
85  
94.81  
0  
0  
97.58  
2.83  
83.65  
4.47  
78.29  
72.4  
85.38  
0  
0  
0  
0  
0  
105.1  
10.05  
103.23  
32.28  
116.69

76.54  
31.02  
99.2  
36.24  
0  
101.32  
7  
5.39  
0  
0  
0  
8.06  
0  
17.09  
0  
0  
0  
0  
0  
0  
0  
0  
84.38  
0  
88.46  
0  
0  
76.9  
103.95  
17.89  
0  
34.41  
0  
15.56  
0  
0  
0  
0  
10.44  
45.12  
32.57  
39.92  
35.61



25.08  
24  
0  
0  
0  
0  
0  
0  
10.44  
6.32  
0  
0  
0  
0  
0  
35.78  
13.93  
16.49  
20.02  
69.81  
40.82  
10.3  
29  
59.03  
136.97  
15.23  
4.12  
87.93  
0  
41.44  
46.82  
86.93  
96.18  
59.44  
0  
63.95  
178.01  
0  
111.09  
0  
74.11  
42.72  
0

0  
0  
0  
42.19  
16.12  
60.54  
34.67  
39.12  
75.93  
74.22  
21.93  
0  
175.05  
0  
64.63  
152.84  
0  
0  
10.05  
216  
85.02  
65.07  
0  
0  
0  
0  
117.55  
0  
68.59  
111  
0  
91.92  
0  
0  
0  
0  
24.35  
0  
0  
75.96  
0  
1  
8

49  
9.06  
34.79  
22.56  
82.73  
0  
0  
68.54  
0  
0  
0  
0  
0  
0  
0  
0  
0  
41  
0  
0  
0  
0  
131.75  
118.19  
0  
1.41  
0  
0  
104.08  
154.03  
77.23  
112.54  
0  
148.98  
168.32  
66.85  
180.62  
0  
0  
65.76  
42.72  
43.68  
133.65  
39.81

28  
0  
54.12  
168.66  
43.83  
34.93  
186.04  
28.6  
166.64  
172.98  
9.43  
120.17  
147.71  
161.68  
200.14  
87.66  
96.18  
30.41  
21.1  
96.57  
41.77  
45.28  
2.24  
38  
56.57  
71.25  
73.76  
88  
0  
0  
0  
0  
0  
0  
0  
62.61  
0  
65.46  
0  
0  
0  
24.6  
71.59  
0

77.41  
0  
65.8  
0  
0  
0  
0  
0  
0  
0  
0  
0  
0  
0  
50.29  
0  
43.32  
0  
38.33  
0  
30.02  
27  
20.62  
31.11  
13.93  
21.93  
13.04  
0  
12.37  
0  
10.77  
9.9  
10.63  
11.66  
0  
0  
0  
19.24  
0  
0  
35.06  
0  
43

59  
0  
0  
66  
61  
0  
67.03  
27.66  
0  
0  
94.49  
37.95  
30.68  
0  
0  
31.38  
0  
0  
0  
0  
0  
0  
0  
0  
0  
0  
0  
0  
0  
0  
0  
0  
0  
31.62  
71.42  
28  
75.6  
61.35  
55.15  
55.95  
0  
0  
129.03  
59.21  
0  
0  
0

0  
0  
0  
0  
0  
22.47  
25.94  
42.01  
41.15  
28.64  
17.8  
0  
0  
0  
10.44  
0  
0  
27.31  
0  
0  
8.54  
0  
6.32  
0  
0  
0  
0  
0  
0  
0  
0  
33.53  
0  
0  
0  
0  
0  
18  
22  
30  
19  
29  
17

23.09  
8.49  
6  
0  
0  
23.6  
24.6  
0  
0  
55.97  
0  
0  
29.15  
47.17  
56  
58.87  
58.94  
65.76  
15  
61.85  
36  
68.36  
78.45  
59.2  
0  
52.81  
65.52  
85.09  
55.03  
66.85  
59.46  
0  
0  
66.13  
9.43  
0  
0  
61.59  
0  
0  
0  
64.38  
26.83



0  
58.26  
0  
15.26  
0  
47.63  
0  
0  
0  
0  
0  
0  
18  
43.84  
8.06  
44.69  
10  
51.4  
0  
18.38  
0  
0  
0  
0  
0  
0  
0  
0  
0  
0  
20.25  
0  
0  
0  
0  
46.49  
7.07  
0  
0  
16.12  
87.09  
0  
0

0  
0  
0  
0  
0  
0  
0  
0  
0  
0  
0

5.83

0  
0  
0  
0  
0  
0  
0  
0  
0  
0  
0  
0  
0

12.73

0  
0  
0  
0  
0  
0  
0  
0  
0  
0

51.66

0  
0  
0  
0  
0  
0  
0  
0  
0  
0  
8  
0



0  
13.45  
0  
78.82  
56.65  
19  
0  
61.01  
0  
145.04  
0  
0  
0  
137.99  
127.76  
23  
0  
0  
0  
2.24  
0  
0  
0  
59.67  
57.01  
30.41  
0  
0  
0  
0  
0  
97.72  
6.4  
0  
0  
0  
74.67  
0  
0  
0  
134.89  
69.86  
0

103.16  
0  
0  
0  
148.49  
0  
0  
153.59  
0  
110.39  
53.26  
0  
0  
9.22  
97.31  
80.5  
0  
128.35  
36.77  
142.66  
150.71  
136.85  
146.24  
32.76  
57  
70.43  
141.16  
45.12  
132.64  
118.34  
0  
10.77  
0  
119.5  
136.24  
103.77  
0  
133.12  
0  
0  
0  
0  
107.91



0  
39  
6  
5  
23  
35.51  
2.24  
0  
0  
5.66  
0  
51.08  
0  
0  
2.24  
0  
0  
0  
0  
0  
0  
0  
0  
0  
0  
0  
0  
0  
0  
0  
0  
0  
0  
0  
40.11  
55.73  
34.71  
49.65  
0  
37.34  
0  
0  
0  
0  
23.26  
30.87  
0







30.41  
81.71  
0  
81.84  
30.36  
0  
88.01  
78.89  
70.26  
55.87  
79.06  
0  
58.14  
0  
0  
59.36  
0  
0  
54.12  
78.29  
67.18  
47.41  
49.74  
0  
0  
0  
0  
0  
0  
0  
0  
0  
0  
67.48  
0  
0  
0  
0  
0  
0  
38.95  
0  
0  
0  
0

0  
3  
0  
0  
0  
0  
7.62  
0  
0  
0  
3.61  
0  
49.98  
11.4  
0  
12.17  
22.09  
19.31  
30.36  
18.97  
33.84  
39.85  
18.03  
40  
0  
39.22  
0  
32.25  
49.65  
0  
0  
0  
0  
0  
11.66  
0  
5  
15  
14.87  
12.53  
104.04  
21.47  
30.81



59.84  
0  
0  
0  
0  
0  
0  
21.93  
0  
23.43  
3.16  
26.91  
16.49  
0  
27.31  
18  
16.76  
48.08  
6.71  
9.9  
0  
0  
0  
0  
0  
0  
0  
0  
0  
0  
0  
0  
0  
0  
0  
0  
0  
0  
0  
0  
0  
67.01  
0  
0  
0  
0  
0  
0  
0  
57.97

0  
0  
0  
0  
0  
0  
0  
0  
0  
0  
17.26  
87.13  
0  
9  
0  
0  
0  
6.71  
87.92  
67.68  
0  
0  
0  
0  
86.35  
32.76  
0  
0  
0  
42.2  
0  
0  
58.59  
0  
0  
0  
0  
0  
0  
0  
39.46  
37.01  
0

0  
0  
0  
0  
0  
0  
0  
0  
0  
0  
0  
45.79  
0  
0  
0  
0  
0  
0  
0  
0  
0  
0  
0  
0  
0  
0  
0  
19.42  
0  
0  
0  
0  
67.98  
0  
0  
0  
0  
0  
4  
0  
0  
6.71  
20.81  
0  
50.21  
0  
0

13.93  
13  
16.76  
22.56  
50  
29  
49.74  
46.32  
29.12  
58.52  
49.04  
25.94  
148.92  
4.24  
13.45  
0  
0  
105.59  
126.02  
44.1  
128.08  
159  
7.07  
0  
24.52  
0  
0  
0  
26.4  
21.47  
18.36  
25.46  
35.36  
42.19  
30  
0  
0  
0  
23.85  
13.89  
0  
0  
0



106.83  
0  
0  
0  
0  
27.51  
0  
0  
0  
0  
0  
0  
0  
156.73  
0  
0  
0  
0  
0  
71  
0  
0  
0  
0  
0  
0  
0  
0  
0  
67  
52.55  
0  
32.65  
0  
0  
0  
0  
0  
0  
100.6  
57.01  
47.41  
59.93  
57.63

109.66  
27.51  
0  
105.76  
61.85  
107.91  
51.66  
49.98  
28.16  
76.66  
68.66  
53.76  
55.54  
73.5  
0  
44.91  
73.01  
65.73  
26.17  
69.23  
8.94  
100.46  
4.12  
5  
5  
8.06  
0  
0  
0  
0  
0  
0  
0  
0  
0  
0  
0  
118.93  
0  
0  
0  
0  
0  
33.84  
1

0  
0  
0  
40.01  
4  
0  
0  
17  
0  
0  
0  
30.81  
0  
5.66  
0  
0  
0  
0  
0  
0  
0  
0  
14.56  
1  
0  
40  
0  
10  
0  
1  
6  
0  
21.02  
9  
42.05  
22.02  
0  
0  
0  
0  
0  
0  
0

74.65  
0  
0  
4.12  
0  
41.59  
1  
0  
0  
0  
0  
0  
0  
0  
0  
0  
0  
0  
15  
0  
2.24  
0  
0  
5  
1  
15.81  
10.2  
9.9  
0  
0  
0  
11.66  
19.8  
0  
0  
0  
0  
0  
0  
0  
0  
0  
0  
0  
0

0  
0  
0  
0  
0  
0  
2  
0  
0  
0  
0  
28.46  
5  
0  
0  
0  
0  
0  
4.12  
0  
0  
0  
50.36  
0  
43.74  
0  
0  
0  
0  
0  
0  
0  
38.83  
0  
0  
0  
0  
0  
78.01  
89.02  
44.1  
0  
0

0  
0  
0  
58  
0  
0  
98.74  
67.27  
66  
0  
0  
0  
0  
82.46  
0  
0  
0  
0  
0  
0  
0  
0  
0  
0  
0  
0  
0  
0  
114.49  
100.62  
104.55  
107.94  
105.91  
110.02  
34.53  
32.57  
75.69  
35.74  
53.54  
20.59  
56.32  
0  
0  
0

0  
0  
0  
0  
12.04  
0  
0  
2  
1  
0  
0  
0  
94.51  
0  
183.1  
0  
58.82  
40  
71.42  
48.85  
54.82  
68.66  
119.51  
161.24  
97  
100  
102  
66.37  
0  
0  
0  
0  
0  
23.6  
20.52  
29.53  
0  
0  
0  
0  
0  
0  
0





0  
0  
3.61  
0  
0  
0  
0  
0  
0  
0  
0  
0  
0  
0  
0  
9.9  
0  
0  
18.38  
0  
0  
0  
0  
0  
0  
62.94  
0  
54.12  
58.59  
63.53  
38.64  
67.36  
63.82  
37.95  
76.37  
73.55  
83.44  
81.34  
78.01  
83.74  
76.66  
89.81  
86.53  
85.7

79.48  
76.56  
71.34  
87.92  
87.85  
91.24  
97.69  
93.48  
0  
47  
40.36  
0  
0  
0  
0  
0  
0  
0  
0  
0  
0  
0  
46.4  
0  
0  
29  
24.76  
0  
0  
51.88  
0  
0  
0  
18.87  
7.07  
0  
0  
0  
0  
0  
0  
0  
0  
11  
0

0  
0  
0  
0  
24.76  
0  
35.11  
0  
0  
61.35  
0  
0  
0  
0  
11  
0  
0  
30.08  
29.61  
0  
0  
0  
0  
0  
0  
0  
15.23  
0  
0  
0  
0  
0  
40  
0  
0  
17.72  
0  
0  
0  
22.2  
0  
24.08  
7.07

0  
0  
0  
4.47  
5.39  
0  
0  
0  
0  
24.19  
0  
0  
0  
0  
0  
0  
19.65  
0  
0  
16.12  
0  
13.6  
0  
0  
0  
0  
110.55  
0  
26.4  
17  
0  
46.62  
15.13  
0  
0  
0  
0  
0  
0  
0  
0  
0  
0



73.06  
109  
41  
33.54  
49.77  
0  
0  
0  
31  
0  
0  
27  
0  
0  
0  
7  
26.08  
0  
85  
7.21  
0  
14.87  
0  
0  
71.17  
0  
0  
6.71  
25  
0  
21.63  
38.6  
0  
26.83  
0  
0  
0  
0  
0  
0  
0  
0  
0  
0



0  
0  
0  
0  
0  
0  
88.07  
0  
0  
68.6  
98.62  
31.78  
106.25  
114.93  
41.15  
127.02  
110.28  
74  
0  
0  
0  
0  
0  
72.2  
0  
0  
0  
0  
0  
0  
0  
0  
0  
0  
0  
12.21  
0  
18.68  
0  
0  
0  
107.33  
0  
0



0  
0  
0  
0  
0  
0  
0  
220.66  
219.57  
224.89  
166.31  
225.41  
241.3  
248.51  
289.31  
245.81  
248.34  
164.65  
262.1  
257.27  
257.93  
231.11  
29.15  
29.73  
21.84  
17.2  
12.73  
11.18  
12  
11  
0  
9  
0  
10  
0  
4  
2.83  
0  
77.78  
3.16  
0  
90.09  
0

0  
0  
45.54  
0  
0  
0  
0  
0  
0  
0  
0  
11  
0  
5.1  
16.28  
0  
0  
0  
0  
0  
0  
0  
0  
0  
0  
0  
0  
0  
12  
0  
13.89  
40.01  
0  
16.4  
0  
0  
21.21  
0  
128.32  
0  
113.14  
114.55  
130.11  
119.5  
123.75

106.78  
0  
107.35  
103.59  
107.81  
104  
94.26  
103.24  
98.41  
112.49  
108.19  
83.01  
47.38  
93.23  
87.46  
0  
0  
0  
0  
47.1  
0  
36.14  
0  
0  
0  
0  
0  
0  
0  
102.63  
101.07  
110.44  
15.62  
6.71  
8  
2  
0  
0  
0  
2.24  
0  
15.56  
1  
0

0  
0  
79  
0  
82.15  
0  
20.62  
0  
0  
3  
0  
0  
0  
0  
0  
146.01  
0  
0  
121.04  
0  
71.7  
0  
0  
0  
0  
0  
0  
0  
0  
73.82  
64.4  
0  
22.36  
101.12  
25  
0  
0  
14.76  
0  
0  
21.93  
0  
55.15

130.48  
48.83  
131.71  
119.52  
125.16  
0  
53  
0  
19.7  
112.54  
48.08  
15.03  
0  
116  
93.01  
87.46  
6  
74.73  
0  
0  
0  
0  
0  
0  
0  
0  
0  
170.85  
149.7  
146.44  
127.58  
125.51  
123.31  
124.02  
121  
131.71  
77.2  
46.49  
76  
0  
0  
0  
0  
0

0  
0  
0  
0  
0  
0  
0  
119.4  
0  
0  
3  
0  
0  
23.32  
0  
0  
0  
156  
146.37  
0  
140.7  
47.8  
0  
0  
0  
0  
0  
0  
0  
128.41  
119.05  
0  
0  
97.86  
112  
109  
97.05  
0  
1  
56  
0  
0  
0  
0



0  
0  
0  
0  
32  
60.21  
20  
4  
0  
19.03  
0  
0  
0  
0  
0  
0  
0  
0  
0  
0  
0  
45.88  
1.41  
0  
0  
15.62  
0  
0  
66.19  
78.72  
76.01  
54.2  
39.6  
59.17  
32.53  
79.2  
0  
63.15  
77.37  
0  
2  
1  
97.02  
1



4.12  
179.97  
176.24  
171.23  
138.51  
26.93  
24.04  
128.36  
129.69  
184  
0  
85.8  
1  
0  
0  
0  
0  
0  
0  
0  
0  
0  
0  
0  
0  
0  
5.39  
0  
24.6  
9  
0  
24  
0  
0  
44.1  
0  
92.44  
25.24  
20.52  
4.24  
2.24  
0  
0  
0  
16  
54.08

70.68  
0  
0  
85.21  
61.85  
1  
0  
0  
0  
0  
0  
0  
0  
14.42  
4  
6.4  
0  
57.31  
0  
0  
0  
0  
0  
0  
0  
35.34  
0  
0  
1  
0  
0  
11.7  
15.23  
0  
0  
0  
0  
0  
0  
1.41  
37.74  
0  
42.72  
2

0  
73.36  
0  
0  
27.66  
0  
0  
0  
0  
0  
0  
0  
0  
0  
0  
0  
0  
36  
35  
7  
0  
0  
0  
0  
0  
0  
0  
0  
0  
4.47  
0  
0  
0  
0  
0  
0  
0  
16.64  
14.76  
0  
0  
48.3  
18.87  
121.76  
57.2

86.35  
63.6  
71.56  
36.77  
19.1  
17.8  
33.84  
36.67  
26.25  
13.34  
0  
81.27  
1  
0  
3.61  
5  
82.37  
0  
111.66  
0  
37.11  
0  
33  
0  
0  
62.3  
0  
67.07  
0  
5  
42.38  
0  
8  
0  
0  
28.6  
0  
69.32  
0  
0  
0  
8.25  
64.35

69.46  
0  
14.56  
16.28  
0  
0  
48.55  
0  
32.53  
55.07  
0  
0  
0  
0  
0  
0  
0  
11.4  
0  
0  
13.45  
10.3  
10.3  
20.12  
0  
0  
0  
65.05  
0  
0  
0  
0  
0  
0  
59.46  
0  
0  
0  
0  
81.6  
75.19  
43.97  
77  
0



0  
0  
0  
0  
0  
0  
0  
0  
0  
35.69  
0  
0  
0  
0  
0  
0  
0  
0  
0  
0  
0  
0  
0  
0  
29.07  
0  
0  
0  
2.24  
0  
0  
0  
0  
0  
0  
0  
0  
0  
0  
0  
0  
20.88  
27.2  
0  
0  
63.7  
6  
0





0  
0  
0  
0  
0  
0  
0  
0  
0  
0  
0  
0  
5.66  
0  
0  
0  
0  
0  
0  
0  
0  
0  
0  
0  
0  
0  
0  
0  
23  
0  
0  
21.1  
3.61  
0  
0  
0  
0  
62.29  
0  
1  
0  
0  
0  
0  
0  
0  
66

27  
55.23  
81.47  
77.08  
61.74  
13  
8.54  
0  
46.67  
0  
0  
0  
0  
10.44  
9  
0  
13.34  
0  
0  
24.04  
16.12  
5.1  
45.18  
47.42  
0  
0  
0  
1  
0  
19.7  
0  
1  
27.46  
0  
0  
3  
0  
13  
0  
0  
0  
0  
0

38.33  
0  
27.8  
0  
22.2  
0  
0  
29.73  
0  
0  
0  
0  
0  
0  
0  
0  
88.55  
0  
0  
0  
0  
0  
0  
0  
0  
20  
45.28  
3  
15.03  
105.65  
1.41  
1  
65.07  
39.05  
55.22  
51.87  
105.6  
23.41  
59.36  
34.13  
0  
0  
0

0  
0  
76.94  
70.24  
53.23  
66.65  
59.24  
0  
0  
0  
60.75  
0  
0  
55.22  
0  
49.93  
54.82  
49.09  
0  
44.2  
49.5  
41.04  
46.49  
50.33  
40.31  
51.04  
36.07  
0  
20.12  
15.65  
0  
7.28  
0  
0  
51  
0  
0  
0  
0  
17.69  
62  
0  
0

0  
31  
38.47  
44.1  
43.1  
44.41  
49  
0  
0  
0  
0  
0  
0  
0  
0  
58.24  
46.82  
0  
12.81  
46  
0  
0  
4.24  
0  
66.73  
15  
8  
3  
0  
192  
101.53  
18.36  
19.21  
0  
0  
0  
0  
0  
0  
0  
0  
0  
0  
0  
0

0  
0  
0  
115.28  
117.39  
104.24  
0  
0  
0  
30.68  
38.28  
0  
41.4  
0  
91  
0  
88.6  
0  
83.82  
0  
0  
0  
81.25  
0  
48.05  
0  
76.32  
0  
104.94  
91.26  
0  
96.03  
17.89  
0  
0  
0  
66.73  
10.63  
0  
86  
76.69  
19.1  
45.89

31.11  
11.18  
56.57  
55.15  
28  
93.09  
87.37  
52  
20.02  
0  
37  
69.05  
98.48  
0  
0  
0  
110.35  
65.51  
0  
85.23  
0  
0  
31.62  
0  
0  
0  
111.8  
13.42  
118.51  
56.04  
46.87  
2  
41.98  
0  
121.4  
86.27  
124.63  
4  
0  
0  
112.07  
208.6  
138.6







0  
0  
0  
60.41  
2  
33.84  
0  
18.79  
0  
53.49  
0  
55  
98.35  
0  
130.21  
110.15  
105.65  
0  
118  
16  
0  
0  
0

s used to compute the mode of the capsid sum intensities
