# Supplementary material
Source: PubMed Central journal article supplement (PMC8675142)
Supplement: NIHMS1754681-supplement-1754681_Sup_Data_4.pdf [file NIHMS1754681-supplement-1754681_Sup_Data_4.pdf]

| Item | Source   | FieldID | ObjID | Capsid Max Intensity | Est # Capsids | Capsid>Cent |
|------|----------|---------|-------|----------------------|---------------|-------------|
| 1    | 3_WT.nd2 | 1       | 1     | 4830                 | 2             | 262.08      |
| 2    | 3_WT.nd2 | 1       | 2     | 2681                 | 1             | 231.37      |
| 3    | 3_WT.nd2 | 1       | 3     | 2678                 | 1             | 28          |
| 4    | 3_WT.nd2 | 1       | 4     | 2795                 | 1             | 223.57      |
| 5    | 3_WT.nd2 | 1       | 5     | 2647                 | 1             | 234.8       |
| 6    | 3_WT.nd2 | 1       | 6     | 2763                 | 1             | 221.55      |
| 7    | 3_WT.nd2 | 1       | 7     | 3367                 | 1             | 221.07      |
| 8    | 3_WT.nd2 | 1       | 8     | 2595                 | 1             | 214.62      |
| 9    | 3_WT.nd2 | 1       | 9     | 2665                 | 1             | 201.36      |
| 10   | 3_WT.nd2 | 1       | 10    | 2675                 | 1             | 261.87      |
| 11   | 3_WT.nd2 | 1       | 11    | 2351                 | 1             | 158.11      |
| 12   | 3_WT.nd2 | 1       | 12    | 3109                 | 1             | 138.97      |
| 13   | 3_WT.nd2 | 1       | 13    | 2563                 | 1             | 93.98       |
| 14   | 3_WT.nd2 | 1       | 14    | 2867                 | 1             | 171.41      |
| 15   | 3_WT.nd2 | 1       | 15    | 3056                 | 1             | 124.08      |
| 16   | 3_WT.nd2 | 1       | 16    | 2360                 | 1             | 107.48      |
| 17   | 3_WT.nd2 | 1       | 17    | 2622                 | 1             | 157.28      |
| 18   | 3_WT.nd2 | 1       | 18    | 3922                 | 1             | 142.36      |
| 19   | 3_WT.nd2 | 1       | 19    | 2710                 | 1             | 168.15      |
| 20   | 3_WT.nd2 | 1       | 20    | 2689                 | 1             | 229.31      |
| 21   | 3_WT.nd2 | 1       | 21    | 3871                 | 1             | 149.83      |
| 22   | 3_WT.nd2 | 1       | 22    | 2486                 | 1             | 109.04      |
| 23   | 3_WT.nd2 | 1       | 23    | 4676                 | 2             | 154.35      |
| 24   | 3_WT.nd2 | 1       | 24    | 2821                 | 1             | 61.74       |
| 25   | 3_WT.nd2 | 1       | 25    | 4330                 | 2             | 150.62      |
| 26   | 3_WT.nd2 | 1       | 26    | 2577                 | 1             | 70.71       |
| 27   | 3_WT.nd2 | 1       | 27    | 2398                 | 1             | 197.73      |
| 28   | 3_WT.nd2 | 1       | 28    | 2766                 | 1             | 61.29       |
| 29   | 3_WT.nd2 | 1       | 29    | 3477                 | 1             | 46.67       |
| 30   | 3_WT.nd2 | 1       | 30    | 2511                 | 1             | 101.84      |
| 31   | 3_WT.nd2 | 1       | 31    | 5032                 | 2             | 46.65       |
| 32   | 3_WT.nd2 | 1       | 32    | 4378                 | 2             | 36.72       |
| 33   | 3_WT.nd2 | 1       | 33    | 3267                 | 1             | 19.8        |
| 34   | 3_WT.nd2 | 1       | 34    | 7319                 | 3             | 34.93       |
| 35   | 3_WT.nd2 | 1       | 35    | 4579                 | 2             | 30.08       |
| 36   | 3_WT.nd2 | 1       | 36    | 3927                 | 1             | 25.02       |
| 37   | 3_WT.nd2 | 1       | 37    | 2929                 | 1             | 75          |
| 38   | 3_WT.nd2 | 1       | 38    | 4214                 | 1             | 24          |
| 39   | 3_WT.nd2 | 1       | 39    | 4138                 | 1             | 18          |
| 40   | 3_WT.nd2 | 1       | 40    | 3584                 | 1             | 17.09       |
| 41   | 3_WT.nd2 | 1       | 41    | 4016                 | 1             | 21.02       |
| 42   | 3_WT.nd2 | 1       | 42    | 2811                 | 1             | 30.41       |

|    |          |   |    |       |    |        |
|----|----------|---|----|-------|----|--------|
| 43 | 3_WT.nd2 | 1 | 43 | 4130  | 1  | 21.21  |
| 44 | 3_WT.nd2 | 1 | 44 | 4264  | 2  | 30.41  |
| 45 | 3_WT.nd2 | 1 | 45 | 4177  | 1  | 26.25  |
| 46 | 3_WT.nd2 | 1 | 46 | 3534  | 1  | 24     |
| 47 | 3_WT.nd2 | 1 | 47 | 3409  | 1  | 35     |
| 48 | 3_WT.nd2 | 1 | 48 | 3494  | 1  | 41.34  |
| 49 | 3_WT.nd2 | 1 | 49 | 2703  | 1  | 127.46 |
| 50 | 3_WT.nd2 | 1 | 50 | 2471  | 1  | 107.63 |
| 51 | 3_WT.nd2 | 1 | 51 | 2539  | 1  | 198.77 |
| 52 | 3_WT.nd2 | 1 | 52 | 64097 | 23 | 142.7  |
| 53 | 3_WT.nd2 | 1 | 53 | 3077  | 1  | 225.7  |
| 54 | 3_WT.nd2 | 1 | 54 | 3176  | 1  | 211.52 |
| 55 | 3_WT.nd2 | 1 | 55 | 3863  | 1  | 210.74 |
| 56 | 3_WT.nd2 | 1 | 56 | 3098  | 1  | 177.45 |
| 57 | 3_WT.nd2 | 1 | 57 | 2842  | 1  | 170.56 |
| 58 | 3_WT.nd2 | 1 | 58 | 2674  | 1  | 160.38 |
| 59 | 3_WT.nd2 | 1 | 59 | 3226  | 1  | 182.79 |
| 60 | 3_WT.nd2 | 1 | 60 | 3710  | 1  | 234.83 |
| 61 | 3_WT.nd2 | 1 | 61 | 4495  | 2  | 192.42 |
| 62 | 3_WT.nd2 | 1 | 62 | 4855  | 2  | 198.15 |
| 63 | 3_WT.nd2 | 1 | 63 | 3618  | 1  | 203    |
| 64 | 3_WT.nd2 | 1 | 64 | 2827  | 1  | 212.32 |
| 65 | 3_WT.nd2 | 1 | 65 | 2800  | 1  | 186.6  |
| 66 | 3_WT.nd2 | 1 | 66 | 3416  | 1  | 226.24 |
| 67 | 3_WT.nd2 | 1 | 67 | 64403 | 23 | 217.42 |
| 68 | 3_WT.nd2 | 1 | 68 | 5310  | 2  | 219.59 |
| 69 | 3_WT.nd2 | 1 | 69 | 3608  | 1  | 222.77 |
| 70 | 3_WT.nd2 | 1 | 70 | 3817  | 1  | 230.21 |
| 71 | 3_WT.nd2 | 1 | 71 | 4283  | 2  | 224.56 |
| 72 | 3_WT.nd2 | 1 | 72 | 2500  | 1  | 207    |
| 73 | 3_WT.nd2 | 1 | 73 | 2516  | 1  | 212    |
| 74 | 3_WT.nd2 | 1 | 74 | 2233  | 1  | 212.55 |
| 75 | 3_WT.nd2 | 1 | 75 | 2985  | 1  | 205.79 |
| 76 | 3_WT.nd2 | 1 | 76 | 2671  | 1  | 227.18 |
| 77 | 3_WT.nd2 | 1 | 77 | 2791  | 1  | 222.8  |
| 78 | 3_WT.nd2 | 1 | 78 | 3571  | 1  | 231.89 |
| 79 | 3_WT.nd2 | 1 | 79 | 2857  | 1  | 237.98 |
| 80 | 3_WT.nd2 | 1 | 80 | 4190  | 1  | 230.67 |
| 81 | 3_WT.nd2 | 1 | 81 | 29313 | 10 | 236.3  |
| 82 | 3_WT.nd2 | 1 | 82 | 3206  | 1  | 251.06 |
| 83 | 3_WT.nd2 | 1 | 83 | 3460  | 1  | 252    |
| 84 | 3_WT.nd2 | 1 | 84 | 3486  | 1  | 252    |
| 85 | 3_WT.nd2 | 1 | 85 | 3116  | 1  | 252.05 |

|     |          |   |    |       |    |        |
|-----|----------|---|----|-------|----|--------|
| 86  | 3_WT.nd2 | 1 | 86 | 2754  | 1  | 256.38 |
| 87  | 3_WT.nd2 | 1 | 87 | 3210  | 1  | 248.02 |
| 88  | 3_WT.nd2 | 1 | 88 | 33858 | 12 | 257.01 |
| 89  | 3_WT.nd2 | 1 | 89 | 3433  | 1  | 269    |
| 90  | 3_WT.nd2 | 1 | 90 | 2852  | 1  | 272.31 |
| 91  | 3_WT.nd2 | 1 | 91 | 2326  | 1  | 289.67 |
| 92  | 3_WT.nd2 | 1 | 92 | 2824  | 1  | 300.19 |
| 93  | 3_WT.nd2 | 1 | 93 | 2355  | 1  | 352.13 |
| 94  | 3_WT.nd2 | 1 | 94 | 3434  | 1  | 369.01 |
| 95  | 3_WT.nd2 | 1 | 95 | 3513  | 1  | 363.98 |
| 96  | 3_WT.nd2 | 1 | 96 | 2540  | 1  | 357    |
| 97  | 3_WT.nd2 | 2 | 1  | 3053  | 1  | 499.6  |
| 98  | 3_WT.nd2 | 2 | 2  | 2898  | 1  | 492.88 |
| 99  | 3_WT.nd2 | 2 | 3  | 3610  | 1  | 490.16 |
| 100 | 3_WT.nd2 | 2 | 4  | 2751  | 1  | 553.24 |
| 101 | 3_WT.nd2 | 2 | 5  | 4877  | 2  | 396.21 |
| 102 | 3_WT.nd2 | 2 | 6  | 4099  | 1  | 380.61 |
| 103 | 3_WT.nd2 | 2 | 7  | 4412  | 2  | 375.93 |
| 104 | 3_WT.nd2 | 2 | 8  | 3130  | 1  | 369.63 |
| 105 | 3_WT.nd2 | 2 | 9  | 2888  | 1  | 363.46 |
| 106 | 3_WT.nd2 | 2 | 10 | 3204  | 1  | 356.79 |
| 107 | 3_WT.nd2 | 2 | 11 | 3069  | 1  | 357.34 |
| 108 | 3_WT.nd2 | 2 | 12 | 3206  | 1  | 353.79 |
| 109 | 3_WT.nd2 | 2 | 13 | 28573 | 10 | 354.38 |
| 110 | 3_WT.nd2 | 2 | 14 | 2573  | 1  | 302.96 |
| 111 | 3_WT.nd2 | 2 | 15 | 2757  | 1  | 292.75 |
| 112 | 3_WT.nd2 | 2 | 16 | 2539  | 1  | 297.88 |
| 113 | 3_WT.nd2 | 2 | 17 | 2440  | 1  | 224.51 |
| 114 | 3_WT.nd2 | 2 | 18 | 3435  | 1  | 173    |
| 115 | 3_WT.nd2 | 2 | 19 | 2770  | 1  | 165    |
| 116 | 3_WT.nd2 | 2 | 20 | 2415  | 1  | 308.15 |
| 117 | 3_WT.nd2 | 2 | 21 | 2808  | 1  | 126.91 |
| 118 | 3_WT.nd2 | 2 | 22 | 3109  | 1  | 242.04 |
| 119 | 3_WT.nd2 | 2 | 23 | 2140  | 1  | 212.62 |
| 120 | 3_WT.nd2 | 2 | 24 | 34920 | 12 | 66     |
| 121 | 3_WT.nd2 | 2 | 25 | 3016  | 1  | 245.6  |
| 122 | 3_WT.nd2 | 2 | 26 | 2385  | 1  | 265.71 |
| 123 | 3_WT.nd2 | 2 | 27 | 4127  | 1  | 56.08  |
| 124 | 3_WT.nd2 | 2 | 28 | 2501  | 1  | 362.83 |
| 125 | 3_WT.nd2 | 2 | 29 | 2257  | 1  | 410.58 |
| 126 | 3_WT.nd2 | 2 | 30 | 4341  | 2  | 232.36 |
| 127 | 3_WT.nd2 | 2 | 31 | 3086  | 1  | 21.93  |
| 128 | 3_WT.nd2 | 2 | 32 | 2654  | 1  | 239    |

|     |          |   |    |       |    |        |
|-----|----------|---|----|-------|----|--------|
| 129 | 3_WT.nd2 | 2 | 33 | 2652  | 1  | 209.68 |
| 130 | 3_WT.nd2 | 2 | 34 | 4784  | 2  | 158.11 |
| 131 | 3_WT.nd2 | 2 | 35 | 3115  | 1  | 23     |
| 132 | 3_WT.nd2 | 2 | 36 | 3111  | 1  | 95.86  |
| 133 | 3_WT.nd2 | 2 | 37 | 2849  | 1  | 333.53 |
| 134 | 3_WT.nd2 | 2 | 38 | 2354  | 1  | 346.55 |
| 135 | 3_WT.nd2 | 2 | 39 | 3301  | 1  | 375.83 |
| 136 | 3_WT.nd2 | 2 | 40 | 3503  | 1  | 125.24 |
| 137 | 3_WT.nd2 | 2 | 41 | 3569  | 1  | 57.71  |
| 138 | 3_WT.nd2 | 2 | 42 | 36588 | 13 | 122.54 |
| 139 | 3_WT.nd2 | 2 | 43 | 2724  | 1  | 115.12 |
| 140 | 3_WT.nd2 | 2 | 44 | 3043  | 1  | 74.06  |
| 141 | 3_WT.nd2 | 2 | 45 | 3709  | 1  | 82.73  |
| 142 | 3_WT.nd2 | 2 | 46 | 2703  | 1  | 64.14  |
| 143 | 3_WT.nd2 | 2 | 47 | 4661  | 2  | 47.51  |
| 144 | 3_WT.nd2 | 2 | 48 | 2957  | 1  | 41.18  |
| 145 | 3_WT.nd2 | 2 | 49 | 3103  | 1  | 32.39  |
| 146 | 3_WT.nd2 | 2 | 50 | 2420  | 1  | 30.59  |
| 147 | 3_WT.nd2 | 2 | 51 | 2312  | 1  | 94.26  |
| 148 | 3_WT.nd2 | 2 | 52 | 2722  | 1  | 22.85  |
| 149 | 3_WT.nd2 | 2 | 53 | 5387  | 2  | 127.46 |
| 150 | 3_WT.nd2 | 3 | 1  | 2836  | 1  | 310.5  |
| 151 | 3_WT.nd2 | 3 | 2  | 3182  | 1  | 304.81 |
| 152 | 3_WT.nd2 | 3 | 3  | 2878  | 1  | 298.81 |
| 153 | 3_WT.nd2 | 3 | 4  | 2908  | 1  | 297.93 |
| 154 | 3_WT.nd2 | 3 | 5  | 3545  | 1  | 282.46 |
| 155 | 3_WT.nd2 | 3 | 6  | 2677  | 1  | 290.77 |
| 156 | 3_WT.nd2 | 3 | 7  | 3717  | 1  | 280.44 |
| 157 | 3_WT.nd2 | 3 | 8  | 2880  | 1  | 275.59 |
| 158 | 3_WT.nd2 | 3 | 9  | 4044  | 1  | 241.13 |
| 159 | 3_WT.nd2 | 3 | 10 | 2697  | 1  | 4      |
| 160 | 3_WT.nd2 | 3 | 11 | 2781  | 1  | 12.21  |
| 161 | 3_WT.nd2 | 3 | 12 | 3078  | 1  | 33.94  |
| 162 | 3_WT.nd2 | 3 | 13 | 3096  | 1  | 29.7   |
| 163 | 3_WT.nd2 | 3 | 14 | 47003 | 17 | 24.76  |
| 164 | 3_WT.nd2 | 3 | 15 | 3283  | 1  | 20.52  |
| 165 | 3_WT.nd2 | 3 | 16 | 3274  | 1  | 32.45  |
| 166 | 3_WT.nd2 | 3 | 17 | 2536  | 1  | 71.12  |
| 167 | 3_WT.nd2 | 3 | 18 | 4271  | 2  | 10.63  |
| 168 | 3_WT.nd2 | 3 | 19 | 3683  | 1  | 267    |
| 169 | 3_WT.nd2 | 3 | 20 | 3266  | 1  | 0      |
| 170 | 3_WT.nd2 | 3 | 21 | 4468  | 2  | 6.4    |
| 171 | 3_WT.nd2 | 3 | 22 | 2803  | 1  | 0      |

|     |          |   |    |       |    |        |
|-----|----------|---|----|-------|----|--------|
| 172 | 3_WT.nd2 | 3 | 23 | 2562  | 1  | 0      |
| 173 | 3_WT.nd2 | 3 | 24 | 47602 | 17 | 8      |
| 174 | 3_WT.nd2 | 3 | 25 | 4825  | 2  | 7      |
| 175 | 3_WT.nd2 | 3 | 26 | 2549  | 1  | 39.12  |
| 176 | 3_WT.nd2 | 3 | 27 | 4921  | 2  | 6.4    |
| 177 | 3_WT.nd2 | 3 | 28 | 7072  | 3  | 8.6    |
| 178 | 3_WT.nd2 | 3 | 29 | 4875  | 2  | 17.09  |
| 179 | 3_WT.nd2 | 3 | 30 | 2336  | 1  | 78.52  |
| 180 | 3_WT.nd2 | 3 | 31 | 25432 | 9  | 22     |
| 181 | 3_WT.nd2 | 3 | 32 | 2729  | 1  | 53.34  |
| 182 | 3_WT.nd2 | 3 | 33 | 26595 | 9  | 15     |
| 183 | 3_WT.nd2 | 3 | 34 | 29458 | 10 | 29.55  |
| 184 | 3_WT.nd2 | 3 | 35 | 3070  | 1  | 15.81  |
| 185 | 3_WT.nd2 | 3 | 36 | 4407  | 2  | 24.7   |
| 186 | 3_WT.nd2 | 3 | 37 | 34404 | 12 | 30.89  |
| 187 | 3_WT.nd2 | 3 | 38 | 3405  | 1  | 13.42  |
| 188 | 3_WT.nd2 | 3 | 39 | 2679  | 1  | 36.62  |
| 189 | 3_WT.nd2 | 3 | 40 | 3431  | 1  | 0      |
| 190 | 3_WT.nd2 | 3 | 41 | 3402  | 1  | 21.19  |
| 191 | 3_WT.nd2 | 3 | 42 | 3229  | 1  | 0      |
| 192 | 3_WT.nd2 | 3 | 43 | 2869  | 1  | 29     |
| 193 | 3_WT.nd2 | 3 | 44 | 2471  | 1  | 73.54  |
| 194 | 3_WT.nd2 | 3 | 45 | 39317 | 14 | 59.48  |
| 195 | 3_WT.nd2 | 3 | 46 | 2822  | 1  | 61     |
| 196 | 3_WT.nd2 | 3 | 47 | 3197  | 1  | 0      |
| 197 | 3_WT.nd2 | 3 | 48 | 2493  | 1  | 137.06 |
| 198 | 3_WT.nd2 | 3 | 49 | 2536  | 1  | 71.4   |
| 199 | 3_WT.nd2 | 3 | 50 | 2675  | 1  | 115.74 |
| 200 | 3_WT.nd2 | 3 | 51 | 2463  | 1  | 128.88 |
| 201 | 3_WT.nd2 | 3 | 52 | 2454  | 1  | 75.17  |
| 202 | 3_WT.nd2 | 3 | 53 | 2973  | 1  | 96.8   |
| 203 | 3_WT.nd2 | 3 | 54 | 2629  | 1  | 144    |
| 204 | 3_WT.nd2 | 3 | 55 | 2632  | 1  | 140.58 |
| 205 | 3_WT.nd2 | 3 | 56 | 3088  | 1  | 108.47 |
| 206 | 3_WT.nd2 | 3 | 57 | 2616  | 1  | 83.68  |
| 207 | 3_WT.nd2 | 3 | 58 | 2973  | 1  | 92.85  |
| 208 | 3_WT.nd2 | 3 | 59 | 3564  | 1  | 68.24  |
| 209 | 3_WT.nd2 | 3 | 60 | 2464  | 1  | 137    |
| 210 | 3_WT.nd2 | 3 | 61 | 3319  | 1  | 55.87  |
| 211 | 3_WT.nd2 | 3 | 62 | 3138  | 1  | 67.36  |
| 212 | 3_WT.nd2 | 3 | 63 | 3105  | 1  | 77.23  |
| 213 | 3_WT.nd2 | 3 | 64 | 3738  | 1  | 67.62  |
| 214 | 3_WT.nd2 | 3 | 65 | 2606  | 1  | 143.38 |

|     |          |   |    |       |    |        |
|-----|----------|---|----|-------|----|--------|
| 215 | 3_WT.nd2 | 3 | 66 | 2565  | 1  | 74.25  |
| 216 | 3_WT.nd2 | 3 | 67 | 2688  | 1  | 59.46  |
| 217 | 3_WT.nd2 | 3 | 68 | 2756  | 1  | 51.87  |
| 218 | 3_WT.nd2 | 3 | 69 | 2723  | 1  | 57.14  |
| 219 | 3_WT.nd2 | 3 | 70 | 3125  | 1  | 69.46  |
| 220 | 3_WT.nd2 | 3 | 71 | 3567  | 1  | 15     |
| 221 | 3_WT.nd2 | 3 | 72 | 2705  | 1  | 95.52  |
| 222 | 3_WT.nd2 | 3 | 73 | 3522  | 1  | 10.82  |
| 223 | 3_WT.nd2 | 3 | 74 | 2563  | 1  | 135.19 |
| 224 | 3_WT.nd2 | 3 | 75 | 3319  | 1  | 13.34  |
| 225 | 3_WT.nd2 | 3 | 76 | 2770  | 1  | 20     |
| 226 | 3_WT.nd2 | 3 | 77 | 48248 | 17 | 26     |
| 227 | 3_WT.nd2 | 3 | 78 | 3675  | 1  | 31.06  |
| 228 | 3_WT.nd2 | 3 | 79 | 2594  | 1  | 77.03  |
| 229 | 3_WT.nd2 | 3 | 80 | 2817  | 1  | 51.35  |
| 230 | 3_WT.nd2 | 3 | 81 | 3267  | 1  | 88     |
| 231 | 3_WT.nd2 | 3 | 82 | 2630  | 1  | 92.54  |
| 232 | 3_WT.nd2 | 3 | 83 | 2895  | 1  | 92.05  |
| 233 | 3_WT.nd2 | 4 | 1  | 3030  | 1  | 115.92 |
| 234 | 3_WT.nd2 | 4 | 2  | 2818  | 1  | 300.42 |
| 235 | 3_WT.nd2 | 4 | 3  | 3424  | 1  | 289.15 |
| 236 | 3_WT.nd2 | 4 | 4  | 3508  | 1  | 278.3  |
| 237 | 3_WT.nd2 | 4 | 5  | 2889  | 1  | 260.77 |
| 238 | 3_WT.nd2 | 4 | 6  | 2897  | 1  | 271.04 |
| 239 | 3_WT.nd2 | 4 | 7  | 2631  | 1  | 1      |
| 240 | 3_WT.nd2 | 4 | 8  | 2606  | 1  | 0      |
| 241 | 3_WT.nd2 | 4 | 9  | 2571  | 1  | 2.24   |
| 242 | 3_WT.nd2 | 4 | 10 | 3191  | 1  | 241    |
| 243 | 3_WT.nd2 | 4 | 11 | 2470  | 1  | 63.07  |
| 244 | 3_WT.nd2 | 4 | 12 | 40628 | 14 | 16.28  |
| 245 | 3_WT.nd2 | 4 | 13 | 2519  | 1  | 25.46  |
| 246 | 3_WT.nd2 | 4 | 14 | 3094  | 1  | 34.66  |
| 247 | 3_WT.nd2 | 4 | 15 | 2320  | 1  | 50.92  |
| 248 | 3_WT.nd2 | 4 | 16 | 2488  | 1  | 5.39   |
| 249 | 3_WT.nd2 | 4 | 17 | 2766  | 1  | 29     |
| 250 | 3_WT.nd2 | 4 | 18 | 3029  | 1  | 21.93  |
| 251 | 3_WT.nd2 | 4 | 19 | 3384  | 1  | 11.4   |
| 252 | 3_WT.nd2 | 4 | 20 | 3087  | 1  | 121    |
| 253 | 3_WT.nd2 | 4 | 21 | 3429  | 1  | 267    |
| 254 | 3_WT.nd2 | 4 | 22 | 2911  | 1  | 21     |
| 255 | 3_WT.nd2 | 4 | 23 | 2657  | 1  | 43     |
| 256 | 3_WT.nd2 | 4 | 24 | 3272  | 1  | 16.76  |
| 257 | 3_WT.nd2 | 4 | 25 | 4170  | 1  | 9      |

|     |          |   |    |       |    |        |
|-----|----------|---|----|-------|----|--------|
| 258 | 3_WT.nd2 | 4 | 26 | 3183  | 1  | 6      |
| 259 | 3_WT.nd2 | 4 | 27 | 3339  | 1  | 10     |
| 260 | 3_WT.nd2 | 4 | 28 | 4238  | 2  | 17.2   |
| 261 | 3_WT.nd2 | 4 | 29 | 4157  | 1  | 11.31  |
| 262 | 3_WT.nd2 | 4 | 30 | 3951  | 1  | 21.93  |
| 263 | 3_WT.nd2 | 4 | 31 | 3664  | 1  | 22.2   |
| 264 | 3_WT.nd2 | 4 | 32 | 4363  | 2  | 21.93  |
| 265 | 3_WT.nd2 | 4 | 33 | 2614  | 1  | 0      |
| 266 | 3_WT.nd2 | 4 | 34 | 4003  | 1  | 14     |
| 267 | 3_WT.nd2 | 4 | 35 | 2755  | 1  | 40.79  |
| 268 | 3_WT.nd2 | 4 | 36 | 2870  | 1  | 64.66  |
| 269 | 3_WT.nd2 | 4 | 37 | 2866  | 1  | 21.93  |
| 270 | 3_WT.nd2 | 4 | 38 | 3824  | 1  | 15.56  |
| 271 | 3_WT.nd2 | 4 | 39 | 3049  | 1  | 20.25  |
| 272 | 3_WT.nd2 | 4 | 40 | 2830  | 1  | 41.68  |
| 273 | 3_WT.nd2 | 4 | 41 | 5862  | 2  | 6      |
| 274 | 3_WT.nd2 | 4 | 42 | 5674  | 2  | 21.54  |
| 275 | 3_WT.nd2 | 4 | 43 | 3417  | 1  | 0      |
| 276 | 3_WT.nd2 | 4 | 44 | 2777  | 1  | 32     |
| 277 | 3_WT.nd2 | 4 | 45 | 2910  | 1  | 138.92 |
| 278 | 3_WT.nd2 | 4 | 46 | 3249  | 1  | 12     |
| 279 | 3_WT.nd2 | 4 | 47 | 2631  | 1  | 75     |
| 280 | 3_WT.nd2 | 4 | 48 | 3088  | 1  | 144.51 |
| 281 | 3_WT.nd2 | 4 | 49 | 2661  | 1  | 142.09 |
| 282 | 3_WT.nd2 | 4 | 50 | 2980  | 1  | 0      |
| 283 | 3_WT.nd2 | 4 | 51 | 2713  | 1  | 143.38 |
| 284 | 3_WT.nd2 | 4 | 52 | 2654  | 1  | 75.01  |
| 285 | 3_WT.nd2 | 4 | 53 | 2614  | 1  | 59.14  |
| 286 | 3_WT.nd2 | 4 | 54 | 2778  | 1  | 68.54  |
| 287 | 3_WT.nd2 | 4 | 55 | 3236  | 1  | 15     |
| 288 | 3_WT.nd2 | 4 | 56 | 37438 | 13 | 11.31  |
| 289 | 3_WT.nd2 | 4 | 57 | 3088  | 1  | 10     |
| 290 | 3_WT.nd2 | 4 | 58 | 2826  | 1  | 12.37  |
| 291 | 3_WT.nd2 | 4 | 59 | 3637  | 1  | 35.36  |
| 292 | 3_WT.nd2 | 4 | 60 | 3938  | 1  | 25     |
| 293 | 3_WT.nd2 | 5 | 1  | 2746  | 1  | 33.38  |
| 294 | 3_WT.nd2 | 5 | 2  | 2836  | 1  | 16     |
| 295 | 3_WT.nd2 | 5 | 3  | 2823  | 1  | 9.49   |
| 296 | 3_WT.nd2 | 5 | 4  | 2970  | 1  | 14.04  |
| 297 | 3_WT.nd2 | 5 | 5  | 2294  | 1  | 0      |
| 298 | 3_WT.nd2 | 5 | 6  | 2425  | 1  | 39     |
| 299 | 3_WT.nd2 | 5 | 7  | 2700  | 1  | 86.68  |
| 300 | 3_WT.nd2 | 5 | 8  | 2844  | 1  | 143.27 |

|     |          |   |    |      |   |        |
|-----|----------|---|----|------|---|--------|
| 301 | 3_WT.nd2 | 5 | 9  | 2881 | 1 | 250.51 |
| 302 | 3_WT.nd2 | 5 | 10 | 3401 | 1 | 232.59 |
| 303 | 3_WT.nd2 | 5 | 11 | 2872 | 1 | 236.93 |
| 304 | 3_WT.nd2 | 5 | 12 | 3087 | 1 | 248.77 |
| 305 | 3_WT.nd2 | 5 | 13 | 3666 | 1 | 257.42 |
| 306 | 3_WT.nd2 | 5 | 14 | 2490 | 1 | 206.29 |
| 307 | 3_WT.nd2 | 5 | 15 | 3165 | 1 | 260.69 |
| 308 | 3_WT.nd2 | 5 | 16 | 3464 | 1 | 261.32 |
| 309 | 3_WT.nd2 | 5 | 17 | 2943 | 1 | 187.04 |
| 310 | 3_WT.nd2 | 5 | 18 | 3859 | 1 | 265.37 |
| 311 | 3_WT.nd2 | 5 | 19 | 2417 | 1 | 96.17  |
| 312 | 3_WT.nd2 | 5 | 20 | 3084 | 1 | 262.07 |
| 313 | 3_WT.nd2 | 5 | 21 | 2851 | 1 | 262    |
| 314 | 3_WT.nd2 | 5 | 22 | 3671 | 1 | 63     |
| 315 | 3_WT.nd2 | 5 | 23 | 2810 | 1 | 263.05 |
| 316 | 3_WT.nd2 | 5 | 24 | 3087 | 1 | 13     |
| 317 | 3_WT.nd2 | 5 | 25 | 2625 | 1 | 310.23 |
| 318 | 3_WT.nd2 | 5 | 26 | 2738 | 1 | 65.19  |
| 319 | 3_WT.nd2 | 5 | 27 | 3042 | 1 | 43.17  |
| 320 | 3_WT.nd2 | 5 | 28 | 3400 | 1 | 258.28 |
| 321 | 3_WT.nd2 | 5 | 29 | 2878 | 1 | 38.59  |
| 322 | 3_WT.nd2 | 5 | 30 | 3513 | 1 | 250.06 |
| 323 | 3_WT.nd2 | 5 | 31 | 3143 | 1 | 64.85  |
| 324 | 3_WT.nd2 | 5 | 32 | 3391 | 1 | 60.54  |
| 325 | 3_WT.nd2 | 5 | 33 | 2922 | 1 | 46.69  |
| 326 | 3_WT.nd2 | 5 | 34 | 2709 | 1 | 35.47  |
| 327 | 3_WT.nd2 | 5 | 35 | 2436 | 1 | 54.74  |
| 328 | 3_WT.nd2 | 5 | 36 | 3282 | 1 | 44.55  |
| 329 | 3_WT.nd2 | 5 | 37 | 4040 | 1 | 54     |
| 330 | 3_WT.nd2 | 5 | 38 | 2476 | 1 | 57     |
| 331 | 3_WT.nd2 | 5 | 39 | 3589 | 1 | 16     |
| 332 | 3_WT.nd2 | 5 | 40 | 2449 | 1 | 31.02  |
| 333 | 3_WT.nd2 | 5 | 41 | 2954 | 1 | 80.53  |
| 334 | 3_WT.nd2 | 5 | 42 | 2526 | 1 | 191.44 |
| 335 | 3_WT.nd2 | 5 | 43 | 2771 | 1 | 102    |
| 336 | 3_WT.nd2 | 5 | 44 | 3107 | 1 | 97.99  |
| 337 | 3_WT.nd2 | 5 | 45 | 3351 | 1 | 99.02  |
| 338 | 3_WT.nd2 | 5 | 46 | 3503 | 1 | 96.52  |
| 339 | 3_WT.nd2 | 5 | 47 | 2591 | 1 | 73.68  |
| 340 | 3_WT.nd2 | 5 | 48 | 2909 | 1 | 50.22  |
| 341 | 3_WT.nd2 | 5 | 49 | 2931 | 1 | 121.66 |
| 342 | 3_WT.nd2 | 5 | 50 | 2790 | 1 | 46.23  |
| 343 | 3_WT.nd2 | 5 | 51 | 2841 | 1 | 120.81 |



|     |          |   |    |       |    |        |
|-----|----------|---|----|-------|----|--------|
| 344 | 3_WT.nd2 | 5 | 52 | 4099  | 1  | 118.7  |
| 345 | 3_WT.nd2 | 5 | 53 | 2535  | 1  | 27.17  |
| 346 | 3_WT.nd2 | 5 | 54 | 4118  | 1  | 117.18 |
| 347 | 3_WT.nd2 | 5 | 55 | 4640  | 2  | 0      |
| 348 | 3_WT.nd2 | 5 | 56 | 4520  | 2  | 116.47 |
| 349 | 3_WT.nd2 | 5 | 57 | 4691  | 2  | 113.74 |
| 350 | 3_WT.nd2 | 5 | 58 | 3532  | 1  | 0      |
| 351 | 3_WT.nd2 | 5 | 59 | 4855  | 2  | 111.02 |
| 352 | 3_WT.nd2 | 5 | 60 | 5030  | 2  | 106.53 |
| 353 | 3_WT.nd2 | 5 | 61 | 3679  | 1  | 66.29  |
| 354 | 3_WT.nd2 | 5 | 62 | 2927  | 1  | 82.86  |
| 355 | 3_WT.nd2 | 5 | 63 | 3197  | 1  | 106.22 |
| 356 | 3_WT.nd2 | 5 | 64 | 2678  | 1  | 80.45  |
| 357 | 3_WT.nd2 | 5 | 65 | 2505  | 1  | 37     |
| 358 | 3_WT.nd2 | 5 | 66 | 5178  | 2  | 98.99  |
| 359 | 3_WT.nd2 | 5 | 67 | 2949  | 1  | 91.92  |
| 360 | 3_WT.nd2 | 5 | 68 | 3558  | 1  | 77.16  |
| 361 | 3_WT.nd2 | 5 | 69 | 2926  | 1  | 273.43 |
| 362 | 3_WT.nd2 | 5 | 70 | 2734  | 1  | 92.2   |
| 363 | 3_WT.nd2 | 5 | 71 | 3336  | 1  | 83.63  |
| 364 | 3_WT.nd2 | 5 | 72 | 3188  | 1  | 65.12  |
| 365 | 3_WT.nd2 | 5 | 73 | 2847  | 1  | 55     |
| 366 | 3_WT.nd2 | 5 | 74 | 2804  | 1  | 63     |
| 367 | 3_WT.nd2 | 5 | 75 | 2502  | 1  | 45.97  |
| 368 | 3_WT.nd2 | 5 | 76 | 2595  | 1  | 63.03  |
| 369 | 3_WT.nd2 | 5 | 77 | 2791  | 1  | 68.26  |
| 370 | 3_WT.nd2 | 5 | 78 | 4499  | 2  | 94.49  |
| 371 | 3_WT.nd2 | 5 | 79 | 2991  | 1  | 51     |
| 372 | 3_WT.nd2 | 5 | 80 | 3237  | 1  | 78.26  |
| 373 | 3_WT.nd2 | 5 | 81 | 3550  | 1  | 47.04  |
| 374 | 3_WT.nd2 | 5 | 82 | 4261  | 2  | 97.64  |
| 375 | 3_WT.nd2 | 5 | 83 | 2823  | 1  | 84.2   |
| 376 | 3_WT.nd2 | 5 | 84 | 3358  | 1  | 39.2   |
| 377 | 3_WT.nd2 | 5 | 85 | 4236  | 2  | 24.19  |
| 378 | 3_WT.nd2 | 5 | 86 | 5718  | 2  | 46     |
| 379 | 3_WT.nd2 | 5 | 87 | 2536  | 1  | 106.94 |
| 380 | 3_WT.nd2 | 5 | 88 | 4341  | 2  | 35.01  |
| 381 | 3_WT.nd2 | 5 | 89 | 5406  | 2  | 34     |
| 382 | 3_WT.nd2 | 5 | 90 | 2856  | 1  | 29     |
| 383 | 3_WT.nd2 | 5 | 91 | 2624  | 1  | 23.71  |
| 384 | 3_WT.nd2 | 5 | 92 | 5902  | 2  | 26     |
| 385 | 3_WT.nd2 | 5 | 93 | 4100  | 1  | 116.73 |
| 386 | 3_WT.nd2 | 5 | 94 | 28468 | 10 | 26.87  |

|     |          |   |     |       |    |        |
|-----|----------|---|-----|-------|----|--------|
| 387 | 3_WT.nd2 | 5 | 95  | 6060  | 2  | 22.83  |
| 388 | 3_WT.nd2 | 5 | 96  | 3070  | 1  | 5.1    |
| 389 | 3_WT.nd2 | 5 | 97  | 6154  | 2  | 10     |
| 390 | 3_WT.nd2 | 5 | 98  | 38489 | 14 | 3      |
| 391 | 3_WT.nd2 | 5 | 99  | 6662  | 2  | 13.6   |
| 392 | 3_WT.nd2 | 5 | 100 | 4440  | 2  | 9.22   |
| 393 | 3_WT.nd2 | 5 | 101 | 5854  | 2  | 7.07   |
| 394 | 3_WT.nd2 | 5 | 102 | 4761  | 2  | 125.16 |
| 395 | 3_WT.nd2 | 5 | 103 | 3493  | 1  | 10     |
| 396 | 3_WT.nd2 | 5 | 104 | 3734  | 1  | 19.1   |
| 397 | 3_WT.nd2 | 5 | 105 | 5839  | 2  | 5.39   |
| 398 | 3_WT.nd2 | 5 | 106 | 4189  | 1  | 6.4    |
| 399 | 3_WT.nd2 | 5 | 107 | 4051  | 1  | 0      |
| 400 | 3_WT.nd2 | 5 | 108 | 3633  | 1  | 6      |
| 401 | 3_WT.nd2 | 5 | 109 | 4429  | 2  | 136.36 |
| 402 | 3_WT.nd2 | 5 | 110 | 4236  | 2  | 0      |
| 403 | 3_WT.nd2 | 5 | 111 | 4770  | 2  | 7.81   |
| 404 | 3_WT.nd2 | 5 | 112 | 3597  | 1  | 0      |
| 405 | 3_WT.nd2 | 5 | 113 | 4201  | 1  | 3      |
| 406 | 3_WT.nd2 | 5 | 114 | 3848  | 1  | 14.14  |
| 407 | 3_WT.nd2 | 5 | 115 | 4857  | 2  | 1.41   |
| 408 | 3_WT.nd2 | 5 | 116 | 3334  | 1  | 25     |
| 409 | 3_WT.nd2 | 5 | 117 | 5818  | 2  | 16.28  |
| 410 | 3_WT.nd2 | 5 | 118 | 3677  | 1  | 60.54  |
| 411 | 3_WT.nd2 | 5 | 119 | 2798  | 1  | 60.08  |
| 412 | 3_WT.nd2 | 5 | 120 | 2816  | 1  | 57.01  |
| 413 | 3_WT.nd2 | 5 | 121 | 2361  | 1  | 56     |
| 414 | 3_WT.nd2 | 5 | 122 | 2610  | 1  | 57.04  |
| 415 | 3_WT.nd2 | 5 | 123 | 2624  | 1  | 65.3   |
| 416 | 3_WT.nd2 | 5 | 124 | 2481  | 1  | 63.53  |
| 417 | 3_WT.nd2 | 5 | 125 | 2744  | 1  | 55     |
| 418 | 3_WT.nd2 | 5 | 126 | 3078  | 1  | 80     |
| 419 | 3_WT.nd2 | 5 | 127 | 2709  | 1  | 20.12  |
| 420 | 3_WT.nd2 | 5 | 128 | 3171  | 1  | 0      |
| 421 | 3_WT.nd2 | 5 | 129 | 4059  | 1  | 0      |
| 422 | 3_WT.nd2 | 5 | 130 | 2689  | 1  | 12     |
| 423 | 3_WT.nd2 | 6 | 1   | 2695  | 1  | 430.29 |
| 424 | 3_WT.nd2 | 6 | 2   | 2539  | 1  | 399.09 |
| 425 | 3_WT.nd2 | 6 | 3   | 2995  | 1  | 207.51 |
| 426 | 3_WT.nd2 | 6 | 4   | 2312  | 1  | 223.68 |
| 427 | 3_WT.nd2 | 6 | 5   | 2620  | 1  | 205.38 |
| 428 | 3_WT.nd2 | 6 | 6   | 2483  | 1  | 175.41 |
| 429 | 3_WT.nd2 | 6 | 7   | 2942  | 1  | 78.29  |

|     |          |   |    |       |    |        |
|-----|----------|---|----|-------|----|--------|
| 430 | 3_WT.nd2 | 6 | 8  | 2533  | 1  | 166.69 |
| 431 | 3_WT.nd2 | 6 | 9  | 4022  | 1  | 43     |
| 432 | 3_WT.nd2 | 6 | 10 | 2583  | 1  | 63.78  |
| 433 | 3_WT.nd2 | 6 | 11 | 3563  | 1  | 28.18  |
| 434 | 3_WT.nd2 | 6 | 12 | 4644  | 2  | 22     |
| 435 | 3_WT.nd2 | 6 | 13 | 3707  | 1  | 3      |
| 436 | 3_WT.nd2 | 6 | 14 | 29491 | 10 | 3.61   |
| 437 | 3_WT.nd2 | 6 | 15 | 4094  | 1  | 0      |
| 438 | 3_WT.nd2 | 6 | 16 | 2765  | 1  | 0      |
| 439 | 3_WT.nd2 | 6 | 17 | 2941  | 1  | 0      |
| 440 | 3_WT.nd2 | 6 | 18 | 3018  | 1  | 0      |
| 441 | 3_WT.nd2 | 6 | 19 | 4045  | 1  | 219.18 |
| 442 | 3_WT.nd2 | 6 | 20 | 3154  | 1  | 207.14 |
| 443 | 3_WT.nd2 | 6 | 21 | 2388  | 1  | 82.33  |
| 444 | 3_WT.nd2 | 6 | 22 | 3144  | 1  | 0      |
| 445 | 3_WT.nd2 | 6 | 23 | 3682  | 1  | 2      |
| 446 | 3_WT.nd2 | 6 | 24 | 3253  | 1  | 192.21 |
| 447 | 3_WT.nd2 | 6 | 25 | 3576  | 1  | 205.57 |
| 448 | 3_WT.nd2 | 6 | 26 | 3025  | 1  | 198.59 |
| 449 | 3_WT.nd2 | 6 | 27 | 2914  | 1  | 52.39  |
| 450 | 3_WT.nd2 | 6 | 28 | 3360  | 1  | 185.31 |
| 451 | 3_WT.nd2 | 6 | 29 | 2473  | 1  | 48.85  |
| 452 | 3_WT.nd2 | 6 | 30 | 2929  | 1  | 37.22  |
| 453 | 3_WT.nd2 | 6 | 31 | 2614  | 1  | 174.24 |
| 454 | 3_WT.nd2 | 6 | 32 | 2581  | 1  | 152.82 |
| 455 | 3_WT.nd2 | 6 | 33 | 25820 | 9  | 39.56  |
| 456 | 3_WT.nd2 | 6 | 34 | 3647  | 1  | 36.36  |
| 457 | 3_WT.nd2 | 6 | 35 | 2929  | 1  | 117.96 |
| 458 | 3_WT.nd2 | 6 | 36 | 3293  | 1  | 50.22  |
| 459 | 3_WT.nd2 | 6 | 37 | 3945  | 1  | 49.4   |
| 460 | 3_WT.nd2 | 6 | 38 | 4044  | 1  | 112.09 |
| 461 | 3_WT.nd2 | 6 | 39 | 2806  | 1  | 136.69 |
| 462 | 3_WT.nd2 | 6 | 40 | 3894  | 1  | 94.58  |
| 463 | 3_WT.nd2 | 6 | 41 | 4128  | 1  | 85.23  |
| 464 | 3_WT.nd2 | 6 | 42 | 3725  | 1  | 120.78 |
| 465 | 3_WT.nd2 | 6 | 43 | 4211  | 1  | 120.21 |
| 466 | 3_WT.nd2 | 6 | 44 | 2980  | 1  | 119.87 |
| 467 | 3_WT.nd2 | 6 | 45 | 2868  | 1  | 45     |
| 468 | 3_WT.nd2 | 6 | 46 | 4672  | 2  | 118.7  |
| 469 | 3_WT.nd2 | 6 | 47 | 2545  | 1  | 121.81 |
| 470 | 3_WT.nd2 | 6 | 48 | 3504  | 1  | 117.18 |
| 471 | 3_WT.nd2 | 6 | 49 | 5412  | 2  | 22.8   |
| 472 | 3_WT.nd2 | 6 | 50 | 2719  | 1  | 24.04  |

|     |          |   |    |       |    |        |
|-----|----------|---|----|-------|----|--------|
| 473 | 3_WT.nd2 | 6 | 51 | 3322  | 1  | 48.17  |
| 474 | 3_WT.nd2 | 6 | 52 | 5980  | 2  | 114.28 |
| 475 | 3_WT.nd2 | 6 | 53 | 6834  | 2  | 110.8  |
| 476 | 3_WT.nd2 | 6 | 54 | 68265 | 24 | 113.16 |
| 477 | 3_WT.nd2 | 6 | 55 | 5493  | 2  | 107.3  |
| 478 | 3_WT.nd2 | 6 | 56 | 3863  | 1  | 2.83   |
| 479 | 3_WT.nd2 | 6 | 57 | 3659  | 1  | 103.02 |
| 480 | 3_WT.nd2 | 6 | 58 | 4097  | 1  | 6.08   |
| 481 | 3_WT.nd2 | 6 | 59 | 2857  | 1  | 146.29 |
| 482 | 3_WT.nd2 | 6 | 60 | 2937  | 1  | 85.09  |
| 483 | 3_WT.nd2 | 6 | 61 | 4774  | 2  | 103.39 |
| 484 | 3_WT.nd2 | 6 | 62 | 2663  | 1  | 149    |
| 485 | 3_WT.nd2 | 6 | 63 | 6999  | 2  | 98.31  |
| 486 | 3_WT.nd2 | 6 | 64 | 2943  | 1  | 115    |
| 487 | 3_WT.nd2 | 6 | 65 | 3226  | 1  | 120.07 |
| 488 | 3_WT.nd2 | 6 | 66 | 3515  | 1  | 24.76  |
| 489 | 3_WT.nd2 | 6 | 67 | 4871  | 2  | 91.22  |
| 490 | 3_WT.nd2 | 6 | 68 | 2913  | 1  | 162.25 |
| 491 | 3_WT.nd2 | 6 | 69 | 2764  | 1  | 70.01  |
| 492 | 3_WT.nd2 | 6 | 70 | 3156  | 1  | 39.82  |
| 493 | 3_WT.nd2 | 6 | 71 | 2475  | 1  | 47.54  |
| 494 | 3_WT.nd2 | 6 | 72 | 2730  | 1  | 50.21  |
| 495 | 3_WT.nd2 | 6 | 73 | 2832  | 1  | 107.28 |
| 496 | 3_WT.nd2 | 6 | 74 | 3536  | 1  | 121.05 |
| 497 | 3_WT.nd2 | 6 | 75 | 3130  | 1  | 129.12 |
| 498 | 3_WT.nd2 | 6 | 76 | 2711  | 1  | 55     |
| 499 | 3_WT.nd2 | 6 | 77 | 2795  | 1  | 119.85 |
| 500 | 3_WT.nd2 | 6 | 78 | 2631  | 1  | 130.03 |
| 501 | 3_WT.nd2 | 6 | 79 | 2530  | 1  | 106    |
| 502 | 3_WT.nd2 | 6 | 80 | 4335  | 2  | 56.44  |
| 503 | 3_WT.nd2 | 6 | 81 | 2487  | 1  | 119.04 |
| 504 | 3_WT.nd2 | 6 | 82 | 2812  | 1  | 174.8  |
| 505 | 3_WT.nd2 | 6 | 83 | 3029  | 1  | 52.15  |
| 506 | 3_WT.nd2 | 6 | 84 | 2452  | 1  | 49.65  |
| 507 | 3_WT.nd2 | 6 | 85 | 2663  | 1  | 133.7  |
| 508 | 3_WT.nd2 | 6 | 86 | 2934  | 1  | 47.52  |
| 509 | 3_WT.nd2 | 6 | 87 | 3558  | 1  | 39     |
| 510 | 3_WT.nd2 | 6 | 88 | 3445  | 1  | 116.81 |
| 511 | 3_WT.nd2 | 6 | 89 | 2692  | 1  | 67     |
| 512 | 3_WT.nd2 | 6 | 90 | 2898  | 1  | 121.61 |
| 513 | 3_WT.nd2 | 6 | 91 | 45977 | 16 | 25.5   |
| 514 | 3_WT.nd2 | 6 | 92 | 3244  | 1  | 23.19  |
| 515 | 3_WT.nd2 | 6 | 93 | 3414  | 1  | 19     |

|     |          |   |     |       |    |        |
|-----|----------|---|-----|-------|----|--------|
| 516 | 3_WT.nd2 | 6 | 94  | 3007  | 1  | 141.6  |
| 517 | 3_WT.nd2 | 6 | 95  | 3475  | 1  | 23.71  |
| 518 | 3_WT.nd2 | 6 | 96  | 47464 | 17 | 19     |
| 519 | 3_WT.nd2 | 6 | 97  | 2854  | 1  | 120.21 |
| 520 | 3_WT.nd2 | 6 | 98  | 3040  | 1  | 9.22   |
| 521 | 3_WT.nd2 | 6 | 99  | 2364  | 1  | 148.12 |
| 522 | 3_WT.nd2 | 6 | 100 | 3857  | 1  | 12.37  |
| 523 | 3_WT.nd2 | 6 | 101 | 4220  | 1  | 7      |
| 524 | 3_WT.nd2 | 6 | 102 | 7229  | 3  | 11.4   |
| 525 | 3_WT.nd2 | 6 | 103 | 7154  | 3  | 12     |
| 526 | 3_WT.nd2 | 6 | 104 | 5238  | 2  | 8.06   |
| 527 | 3_WT.nd2 | 6 | 105 | 2965  | 1  | 128.08 |
| 528 | 3_WT.nd2 | 6 | 106 | 39157 | 14 | 26.17  |
| 529 | 3_WT.nd2 | 6 | 107 | 3183  | 1  | 131.05 |
| 530 | 3_WT.nd2 | 6 | 108 | 5436  | 2  | 3      |
| 531 | 3_WT.nd2 | 6 | 109 | 40393 | 14 | 10.2   |
| 532 | 3_WT.nd2 | 6 | 110 | 4620  | 2  | 14.56  |
| 533 | 3_WT.nd2 | 6 | 111 | 5963  | 2  | 1      |
| 534 | 3_WT.nd2 | 6 | 112 | 3834  | 1  | 17     |
| 535 | 3_WT.nd2 | 6 | 113 | 2704  | 1  | 137.13 |
| 536 | 3_WT.nd2 | 6 | 114 | 5046  | 2  | 0      |
| 537 | 3_WT.nd2 | 6 | 115 | 6010  | 2  | 0      |
| 538 | 3_WT.nd2 | 6 | 116 | 5110  | 2  | 12     |
| 539 | 3_WT.nd2 | 6 | 117 | 4830  | 2  | 20     |
| 540 | 3_WT.nd2 | 6 | 118 | 2877  | 1  | 47.42  |
| 541 | 3_WT.nd2 | 6 | 119 | 66273 | 24 | 2.24   |
| 542 | 3_WT.nd2 | 6 | 120 | 2627  | 1  | 28     |
| 543 | 3_WT.nd2 | 6 | 121 | 5943  | 2  | 15     |
| 544 | 3_WT.nd2 | 6 | 122 | 3717  | 1  | 61.22  |
| 545 | 3_WT.nd2 | 6 | 123 | 3868  | 1  | 4.12   |
| 546 | 3_WT.nd2 | 6 | 124 | 5961  | 2  | 6.4    |
| 547 | 3_WT.nd2 | 6 | 125 | 6274  | 2  | 13.89  |
| 548 | 3_WT.nd2 | 6 | 126 | 3634  | 1  | 1.41   |
| 549 | 3_WT.nd2 | 6 | 127 | 2818  | 1  | 24.6   |
| 550 | 3_WT.nd2 | 6 | 128 | 2869  | 1  | 139.34 |
| 551 | 3_WT.nd2 | 6 | 129 | 2605  | 1  | 51.24  |
| 552 | 3_WT.nd2 | 6 | 130 | 2775  | 1  | 100.12 |
| 553 | 3_WT.nd2 | 6 | 131 | 2955  | 1  | 54.82  |
| 554 | 3_WT.nd2 | 6 | 132 | 2915  | 1  | 73.25  |
| 555 | 3_WT.nd2 | 6 | 133 | 2418  | 1  | 65.37  |
| 556 | 3_WT.nd2 | 6 | 134 | 2559  | 1  | 64.4   |
| 557 | 3_WT.nd2 | 6 | 135 | 4230  | 2  | 58     |
| 558 | 3_WT.nd2 | 6 | 136 | 3719  | 1  | 67.98  |

|     |          |   |     |      |   |        |
|-----|----------|---|-----|------|---|--------|
| 559 | 3_WT.nd2 | 6 | 137 | 4283 | 2 | 69.84  |
| 560 | 3_WT.nd2 | 6 | 138 | 4297 | 2 | 63.35  |
| 561 | 3_WT.nd2 | 6 | 139 | 2706 | 1 | 25     |
| 562 | 3_WT.nd2 | 6 | 140 | 2363 | 1 | 76.28  |
| 563 | 3_WT.nd2 | 6 | 141 | 2690 | 1 | 61.98  |
| 564 | 3_WT.nd2 | 6 | 142 | 2592 | 1 | 79     |
| 565 | 3_WT.nd2 | 6 | 143 | 2744 | 1 | 2      |
| 566 | 3_WT.nd2 | 6 | 144 | 2931 | 1 | 16.28  |
| 567 | 3_WT.nd2 | 7 | 1   | 2589 | 1 | 446.16 |
| 568 | 3_WT.nd2 | 7 | 2   | 2360 | 1 | 87.57  |
| 569 | 3_WT.nd2 | 7 | 3   | 2853 | 1 | 81     |
| 570 | 3_WT.nd2 | 7 | 4   | 2253 | 1 | 59.41  |
| 571 | 3_WT.nd2 | 7 | 5   | 2902 | 1 | 150.07 |
| 572 | 3_WT.nd2 | 7 | 6   | 2786 | 1 | 133.54 |
| 573 | 3_WT.nd2 | 7 | 7   | 3260 | 1 | 271.53 |
| 574 | 3_WT.nd2 | 7 | 8   | 3255 | 1 | 268.07 |
| 575 | 3_WT.nd2 | 7 | 9   | 2686 | 1 | 255.56 |
| 576 | 3_WT.nd2 | 7 | 10  | 4263 | 2 | 87.82  |
| 577 | 3_WT.nd2 | 7 | 11  | 2555 | 1 | 28.3   |
| 578 | 3_WT.nd2 | 7 | 12  | 4616 | 2 | 16     |
| 579 | 3_WT.nd2 | 7 | 13  | 2273 | 1 | 264.2  |
| 580 | 3_WT.nd2 | 7 | 14  | 2951 | 1 | 71.57  |
| 581 | 3_WT.nd2 | 7 | 15  | 2407 | 1 | 116.02 |
| 582 | 3_WT.nd2 | 7 | 16  | 3250 | 1 | 69.35  |
| 583 | 3_WT.nd2 | 7 | 17  | 2958 | 1 | 241.42 |
| 584 | 3_WT.nd2 | 7 | 18  | 3665 | 1 | 82.37  |
| 585 | 3_WT.nd2 | 7 | 19  | 2419 | 1 | 89     |
| 586 | 3_WT.nd2 | 7 | 20  | 3532 | 1 | 23     |
| 587 | 3_WT.nd2 | 7 | 21  | 2308 | 1 | 59.23  |
| 588 | 3_WT.nd2 | 7 | 22  | 2396 | 1 | 25.18  |
| 589 | 3_WT.nd2 | 7 | 23  | 3865 | 1 | 42.94  |
| 590 | 3_WT.nd2 | 7 | 24  | 2466 | 1 | 223    |
| 591 | 3_WT.nd2 | 7 | 25  | 2695 | 1 | 254.28 |
| 592 | 3_WT.nd2 | 7 | 26  | 2683 | 1 | 235    |
| 593 | 3_WT.nd2 | 7 | 27  | 2386 | 1 | 248    |
| 594 | 3_WT.nd2 | 7 | 28  | 5865 | 2 | 37.12  |
| 595 | 3_WT.nd2 | 7 | 29  | 2734 | 1 | 48     |
| 596 | 3_WT.nd2 | 7 | 30  | 4356 | 2 | 30.89  |
| 597 | 3_WT.nd2 | 7 | 31  | 5018 | 2 | 24.7   |
| 598 | 3_WT.nd2 | 7 | 32  | 2696 | 1 | 97     |
| 599 | 3_WT.nd2 | 7 | 33  | 5458 | 2 | 21.47  |
| 600 | 3_WT.nd2 | 7 | 34  | 2643 | 1 | 0      |
| 601 | 3_WT.nd2 | 7 | 35  | 2307 | 1 | 89.01  |

|     |          |   |    |       |    |        |
|-----|----------|---|----|-------|----|--------|
| 602 | 3_WT.nd2 | 7 | 36 | 6032  | 2  | 16.49  |
| 603 | 3_WT.nd2 | 7 | 37 | 5765  | 2  | 12     |
| 604 | 3_WT.nd2 | 7 | 38 | 2858  | 1  | 100.18 |
| 605 | 3_WT.nd2 | 7 | 39 | 2567  | 1  | 13.89  |
| 606 | 3_WT.nd2 | 7 | 40 | 2290  | 1  | 43.74  |
| 607 | 3_WT.nd2 | 7 | 41 | 4544  | 2  | 9      |
| 608 | 3_WT.nd2 | 7 | 42 | 4305  | 2  | 6.08   |
| 609 | 3_WT.nd2 | 7 | 43 | 2598  | 1  | 77.41  |
| 610 | 3_WT.nd2 | 7 | 44 | 2638  | 1  | 58.46  |
| 611 | 3_WT.nd2 | 7 | 45 | 2858  | 1  | 70.88  |
| 612 | 3_WT.nd2 | 7 | 46 | 4786  | 2  | 37.16  |
| 613 | 3_WT.nd2 | 7 | 47 | 4941  | 2  | 7.81   |
| 614 | 3_WT.nd2 | 7 | 48 | 7197  | 3  | 9.22   |
| 615 | 3_WT.nd2 | 7 | 49 | 3401  | 1  | 36.4   |
| 616 | 3_WT.nd2 | 7 | 50 | 6073  | 2  | 19.03  |
| 617 | 3_WT.nd2 | 7 | 51 | 3597  | 1  | 25     |
| 618 | 3_WT.nd2 | 7 | 52 | 3239  | 1  | 39.7   |
| 619 | 3_WT.nd2 | 7 | 53 | 4651  | 2  | 28     |
| 620 | 3_WT.nd2 | 7 | 54 | 3898  | 1  | 43     |
| 621 | 3_WT.nd2 | 7 | 55 | 2855  | 1  | 60     |
| 622 | 3_WT.nd2 | 7 | 56 | 3918  | 1  | 49     |
| 623 | 3_WT.nd2 | 7 | 57 | 4967  | 2  | 0      |
| 624 | 3_WT.nd2 | 7 | 58 | 4859  | 2  | 37.05  |
| 625 | 3_WT.nd2 | 7 | 59 | 4135  | 1  | 42.43  |
| 626 | 3_WT.nd2 | 7 | 60 | 3487  | 1  | 43.28  |
| 627 | 3_WT.nd2 | 7 | 61 | 4182  | 1  | 0      |
| 628 | 3_WT.nd2 | 7 | 62 | 3958  | 1  | 39.05  |
| 629 | 3_WT.nd2 | 7 | 63 | 3624  | 1  | 33.02  |
| 630 | 3_WT.nd2 | 7 | 64 | 6635  | 2  | 29     |
| 631 | 3_WT.nd2 | 7 | 65 | 3693  | 1  | 44.91  |
| 632 | 3_WT.nd2 | 7 | 66 | 3809  | 1  | 21     |
| 633 | 3_WT.nd2 | 7 | 67 | 2696  | 1  | 15.52  |
| 634 | 3_WT.nd2 | 7 | 68 | 40306 | 14 | 10.63  |
| 635 | 3_WT.nd2 | 7 | 69 | 3821  | 1  | 9.9    |
| 636 | 3_WT.nd2 | 7 | 70 | 3102  | 1  | 14.87  |
| 637 | 3_WT.nd2 | 7 | 71 | 5268  | 2  | 18     |
| 638 | 3_WT.nd2 | 7 | 72 | 4615  | 2  | 39     |
| 639 | 3_WT.nd2 | 7 | 73 | 2635  | 1  | 102.94 |
| 640 | 3_WT.nd2 | 7 | 74 | 2567  | 1  | 41.18  |
| 641 | 3_WT.nd2 | 7 | 75 | 36103 | 13 | 92.28  |
| 642 | 3_WT.nd2 | 7 | 76 | 2943  | 1  | 93.11  |
| 643 | 3_WT.nd2 | 7 | 77 | 3806  | 1  | 52.35  |
| 644 | 3_WT.nd2 | 7 | 78 | 4976  | 2  | 114.55 |

|     |          |   |     |       |    |        |
|-----|----------|---|-----|-------|----|--------|
| 645 | 3_WT.nd2 | 7 | 79  | 2761  | 1  | 101.86 |
| 646 | 3_WT.nd2 | 7 | 80  | 2619  | 1  | 69.87  |
| 647 | 3_WT.nd2 | 7 | 81  | 2227  | 1  | 108.41 |
| 648 | 3_WT.nd2 | 7 | 82  | 3885  | 1  | 56.64  |
| 649 | 3_WT.nd2 | 7 | 83  | 3685  | 1  | 99.37  |
| 650 | 3_WT.nd2 | 7 | 84  | 3554  | 1  | 75     |
| 651 | 3_WT.nd2 | 7 | 85  | 3746  | 1  | 74.52  |
| 652 | 3_WT.nd2 | 7 | 86  | 6132  | 2  | 56     |
| 653 | 3_WT.nd2 | 7 | 87  | 2535  | 1  | 100.9  |
| 654 | 3_WT.nd2 | 7 | 88  | 56219 | 20 | 53     |
| 655 | 3_WT.nd2 | 7 | 89  | 3962  | 1  | 83     |
| 656 | 3_WT.nd2 | 7 | 90  | 3214  | 1  | 123    |
| 657 | 3_WT.nd2 | 7 | 91  | 3290  | 1  | 142.3  |
| 658 | 3_WT.nd2 | 7 | 92  | 2684  | 1  | 41.18  |
| 659 | 3_WT.nd2 | 7 | 93  | 4443  | 2  | 29.7   |
| 660 | 3_WT.nd2 | 7 | 94  | 2408  | 1  | 13.04  |
| 661 | 3_WT.nd2 | 7 | 95  | 3170  | 1  | 1      |
| 662 | 3_WT.nd2 | 7 | 96  | 3012  | 1  | 103.58 |
| 663 | 3_WT.nd2 | 7 | 97  | 4448  | 2  | 2.83   |
| 664 | 3_WT.nd2 | 7 | 98  | 4362  | 2  | 60.11  |
| 665 | 3_WT.nd2 | 7 | 99  | 3279  | 1  | 96.88  |
| 666 | 3_WT.nd2 | 7 | 100 | 3441  | 1  | 60     |
| 667 | 3_WT.nd2 | 7 | 101 | 3224  | 1  | 53     |
| 668 | 3_WT.nd2 | 7 | 102 | 3087  | 1  | 15.13  |
| 669 | 3_WT.nd2 | 7 | 103 | 3704  | 1  | 65.38  |
| 670 | 3_WT.nd2 | 7 | 104 | 49337 | 18 | 65.95  |
| 671 | 3_WT.nd2 | 7 | 105 | 2654  | 1  | 8      |
| 672 | 3_WT.nd2 | 7 | 106 | 2652  | 1  | 13.45  |
| 673 | 3_WT.nd2 | 7 | 107 | 3332  | 1  | 41.76  |
| 674 | 3_WT.nd2 | 7 | 108 | 3560  | 1  | 69.32  |
| 675 | 3_WT.nd2 | 7 | 109 | 3784  | 1  | 39.41  |
| 676 | 3_WT.nd2 | 7 | 110 | 3127  | 1  | 38.9   |
| 677 | 3_WT.nd2 | 7 | 111 | 2912  | 1  | 66.65  |
| 678 | 3_WT.nd2 | 7 | 112 | 3422  | 1  | 62.97  |
| 679 | 3_WT.nd2 | 7 | 113 | 3221  | 1  | 50.21  |
| 680 | 3_WT.nd2 | 7 | 114 | 2404  | 1  | 130.3  |
| 681 | 3_WT.nd2 | 7 | 115 | 5164  | 2  | 36.06  |
| 682 | 3_WT.nd2 | 7 | 116 | 4826  | 2  | 54.74  |
| 683 | 3_WT.nd2 | 7 | 117 | 3267  | 1  | 46.27  |
| 684 | 3_WT.nd2 | 7 | 118 | 45917 | 16 | 56     |
| 685 | 3_WT.nd2 | 7 | 119 | 2709  | 1  | 81     |
| 686 | 3_WT.nd2 | 7 | 120 | 3877  | 1  | 57     |
| 687 | 3_WT.nd2 | 7 | 121 | 66943 | 24 | 17     |



|     |          |   |     |       |    |        |
|-----|----------|---|-----|-------|----|--------|
| 688 | 3_WT.nd2 | 7 | 122 | 4983  | 2  | 12.17  |
| 689 | 3_WT.nd2 | 7 | 123 | 4452  | 2  | 31.38  |
| 690 | 3_WT.nd2 | 7 | 124 | 2819  | 1  | 86.09  |
| 691 | 3_WT.nd2 | 7 | 125 | 2526  | 1  | 111.22 |
| 692 | 3_WT.nd2 | 7 | 126 | 38713 | 14 | 11.31  |
| 693 | 3_WT.nd2 | 7 | 127 | 3938  | 1  | 8.06   |
| 694 | 3_WT.nd2 | 7 | 128 | 3307  | 1  | 27.02  |
| 695 | 3_WT.nd2 | 7 | 129 | 3875  | 1  | 158    |
| 696 | 3_WT.nd2 | 7 | 130 | 3620  | 1  | 156.03 |
| 697 | 3_WT.nd2 | 7 | 131 | 4150  | 1  | 152.5  |
| 698 | 3_WT.nd2 | 7 | 132 | 3314  | 1  | 176.14 |
| 699 | 3_WT.nd2 | 7 | 133 | 3123  | 1  | 189.71 |
| 700 | 3_WT.nd2 | 7 | 134 | 3421  | 1  | 215.23 |
| 701 | 3_WT.nd2 | 7 | 135 | 2775  | 1  | 172.26 |
| 702 | 3_WT.nd2 | 8 | 1   | 3358  | 1  | 185.99 |
| 703 | 3_WT.nd2 | 8 | 2   | 4159  | 1  | 151    |
| 704 | 3_WT.nd2 | 8 | 3   | 2952  | 1  | 150.96 |
| 705 | 3_WT.nd2 | 8 | 4   | 2849  | 1  | 149.64 |
| 706 | 3_WT.nd2 | 8 | 5   | 4527  | 2  | 68.41  |
| 707 | 3_WT.nd2 | 8 | 6   | 3599  | 1  | 59.41  |
| 708 | 3_WT.nd2 | 8 | 7   | 3162  | 1  | 42.72  |
| 709 | 3_WT.nd2 | 8 | 8   | 2747  | 1  | 126.92 |
| 710 | 3_WT.nd2 | 8 | 9   | 3650  | 1  | 53.15  |
| 711 | 3_WT.nd2 | 8 | 10  | 2589  | 1  | 25     |
| 712 | 3_WT.nd2 | 8 | 11  | 3756  | 1  | 42.2   |
| 713 | 3_WT.nd2 | 8 | 12  | 4210  | 1  | 37.48  |
| 714 | 3_WT.nd2 | 8 | 13  | 4435  | 2  | 26.17  |
| 715 | 3_WT.nd2 | 8 | 14  | 8413  | 3  | 20.52  |
| 716 | 3_WT.nd2 | 8 | 15  | 7714  | 3  | 14.87  |
| 717 | 3_WT.nd2 | 8 | 16  | 2707  | 1  | 243.35 |
| 718 | 3_WT.nd2 | 8 | 17  | 3106  | 1  | 50.36  |
| 719 | 3_WT.nd2 | 8 | 18  | 6229  | 2  | 9.22   |
| 720 | 3_WT.nd2 | 8 | 19  | 17254 | 6  | 12.08  |
| 721 | 3_WT.nd2 | 8 | 20  | 5632  | 2  | 2.24   |
| 722 | 3_WT.nd2 | 8 | 21  | 5863  | 2  | 1.41   |
| 723 | 3_WT.nd2 | 8 | 22  | 3894  | 1  | 52.09  |
| 724 | 3_WT.nd2 | 8 | 23  | 7805  | 3  | 25     |
| 725 | 3_WT.nd2 | 8 | 24  | 7962  | 3  | 0      |
| 726 | 3_WT.nd2 | 8 | 25  | 2818  | 1  | 232    |
| 727 | 3_WT.nd2 | 8 | 26  | 2817  | 1  | 244.25 |
| 728 | 3_WT.nd2 | 8 | 27  | 10221 | 4  | 1      |
| 729 | 3_WT.nd2 | 8 | 28  | 11799 | 4  | 0      |
| 730 | 3_WT.nd2 | 8 | 29  | 12234 | 4  | 17     |

|     |          |   |    |       |    |        |
|-----|----------|---|----|-------|----|--------|
| 731 | 3_WT.nd2 | 8 | 30 | 8504  | 3  | 12     |
| 732 | 3_WT.nd2 | 8 | 31 | 5410  | 2  | 8      |
| 733 | 3_WT.nd2 | 8 | 32 | 3385  | 1  | 55     |
| 734 | 3_WT.nd2 | 8 | 33 | 8441  | 3  | 26.48  |
| 735 | 3_WT.nd2 | 8 | 34 | 3471  | 1  | 46     |
| 736 | 3_WT.nd2 | 8 | 35 | 7712  | 3  | 26     |
| 737 | 3_WT.nd2 | 8 | 36 | 8311  | 3  | 29.73  |
| 738 | 3_WT.nd2 | 8 | 37 | 3267  | 1  | 255.03 |
| 739 | 3_WT.nd2 | 8 | 38 | 3175  | 1  | 259.7  |
| 740 | 3_WT.nd2 | 8 | 39 | 2917  | 1  | 150.48 |
| 741 | 3_WT.nd2 | 8 | 40 | 3748  | 1  | 10     |
| 742 | 3_WT.nd2 | 8 | 41 | 3373  | 1  | 261.93 |
| 743 | 3_WT.nd2 | 8 | 42 | 3536  | 1  | 267.58 |
| 744 | 3_WT.nd2 | 8 | 43 | 2503  | 1  | 168.83 |
| 745 | 3_WT.nd2 | 8 | 44 | 3033  | 1  | 179.95 |
| 746 | 3_WT.nd2 | 8 | 45 | 4556  | 2  | 80.81  |
| 747 | 3_WT.nd2 | 8 | 46 | 2390  | 1  | 243.68 |
| 748 | 3_WT.nd2 | 8 | 47 | 4093  | 1  | 184.3  |
| 749 | 3_WT.nd2 | 8 | 48 | 3443  | 1  | 199.16 |
| 750 | 3_WT.nd2 | 8 | 49 | 2495  | 1  | 183.24 |
| 751 | 3_WT.nd2 | 8 | 50 | 3382  | 1  | 239.42 |
| 752 | 3_WT.nd2 | 8 | 51 | 3557  | 1  | 255.88 |
| 753 | 3_WT.nd2 | 8 | 52 | 4413  | 2  | 334.82 |
| 754 | 3_WT.nd2 | 8 | 53 | 2818  | 1  | 325.15 |
| 755 | 3_WT.nd2 | 8 | 54 | 3864  | 1  | 282.34 |
| 756 | 3_WT.nd2 | 8 | 55 | 2677  | 1  | 242.42 |
| 757 | 3_WT.nd2 | 8 | 56 | 37468 | 13 | 295.65 |
| 758 | 3_WT.nd2 | 8 | 57 | 3211  | 1  | 346.23 |
| 759 | 3_WT.nd2 | 8 | 58 | 3092  | 1  | 293.92 |
| 760 | 3_WT.nd2 | 8 | 59 | 2467  | 1  | 266.18 |
| 761 | 3_WT.nd2 | 8 | 60 | 2626  | 1  | 328.93 |
| 762 | 3_WT.nd2 | 8 | 61 | 2646  | 1  | 355.07 |
| 763 | 3_WT.nd2 | 8 | 62 | 3157  | 1  | 270.39 |
| 764 | 3_WT.nd2 | 8 | 63 | 3017  | 1  | 254.17 |
| 765 | 3_WT.nd2 | 8 | 64 | 29679 | 11 | 329.84 |
| 766 | 3_WT.nd2 | 8 | 65 | 4141  | 1  | 261.72 |
| 767 | 3_WT.nd2 | 8 | 66 | 3684  | 1  | 274.49 |
| 768 | 3_WT.nd2 | 8 | 67 | 5056  | 2  | 268.73 |
| 769 | 3_WT.nd2 | 8 | 68 | 3190  | 1  | 279.16 |
| 770 | 3_WT.nd2 | 8 | 69 | 4113  | 1  | 302.79 |
| 771 | 3_WT.nd2 | 8 | 70 | 2823  | 1  | 274.96 |
| 772 | 3_WT.nd2 | 8 | 71 | 3121  | 1  | 290.7  |
| 773 | 3_WT.nd2 | 8 | 72 | 8977  | 3  | 286.2  |

|     |          |   |     |       |    |        |
|-----|----------|---|-----|-------|----|--------|
| 774 | 3_WT.nd2 | 8 | 73  | 3406  | 1  | 289.59 |
| 775 | 3_WT.nd2 | 8 | 74  | 56437 | 20 | 315.36 |
| 776 | 3_WT.nd2 | 8 | 75  | 4394  | 2  | 310.01 |
| 777 | 3_WT.nd2 | 8 | 76  | 3127  | 1  | 293.64 |
| 778 | 3_WT.nd2 | 8 | 77  | 4233  | 2  | 306.11 |
| 779 | 3_WT.nd2 | 8 | 78  | 4469  | 2  | 301.73 |
| 780 | 3_WT.nd2 | 8 | 79  | 4025  | 1  | 303.3  |
| 781 | 3_WT.nd2 | 8 | 80  | 2709  | 1  | 328.34 |
| 782 | 3_WT.nd2 | 8 | 81  | 5218  | 2  | 294.85 |
| 783 | 3_WT.nd2 | 8 | 82  | 4362  | 2  | 302.29 |
| 784 | 3_WT.nd2 | 8 | 83  | 2870  | 1  | 333.66 |
| 785 | 3_WT.nd2 | 8 | 84  | 3181  | 1  | 332.29 |
| 786 | 3_WT.nd2 | 8 | 85  | 3647  | 1  | 314.75 |
| 787 | 3_WT.nd2 | 8 | 86  | 3927  | 1  | 309.97 |
| 788 | 3_WT.nd2 | 8 | 87  | 4135  | 1  | 321.46 |
| 789 | 3_WT.nd2 | 8 | 88  | 56353 | 20 | 311.58 |
| 790 | 3_WT.nd2 | 8 | 89  | 7791  | 3  | 311.96 |
| 791 | 3_WT.nd2 | 8 | 90  | 3923  | 1  | 315.04 |
| 792 | 3_WT.nd2 | 8 | 91  | 2954  | 1  | 339.44 |
| 793 | 3_WT.nd2 | 8 | 92  | 3296  | 1  | 312.14 |
| 794 | 3_WT.nd2 | 8 | 93  | 7094  | 3  | 313.13 |
| 795 | 3_WT.nd2 | 8 | 94  | 2721  | 1  | 333.44 |
| 796 | 3_WT.nd2 | 8 | 95  | 2810  | 1  | 340.65 |
| 797 | 3_WT.nd2 | 8 | 96  | 4015  | 1  | 316.22 |
| 798 | 3_WT.nd2 | 8 | 97  | 3006  | 1  | 356    |
| 799 | 3_WT.nd2 | 8 | 98  | 3336  | 1  | 367.71 |
| 800 | 3_WT.nd2 | 8 | 99  | 2795  | 1  | 339.8  |
| 801 | 3_WT.nd2 | 8 | 100 | 2702  | 1  | 485.21 |
| 802 | 3_WT.nd2 | 8 | 101 | 2905  | 1  | 334.01 |
| 803 | 3_WT.nd2 | 8 | 102 | 3110  | 1  | 354.97 |
| 804 | 3_WT.nd2 | 8 | 103 | 2944  | 1  | 381.06 |
| 805 | 3_WT.nd2 | 8 | 104 | 2610  | 1  | 389.08 |
| 806 | 3_WT.nd2 | 8 | 105 | 4175  | 1  | 394.85 |
| 807 | 3_WT.nd2 | 9 | 1   | 3955  | 1  | 150.01 |
| 808 | 3_WT.nd2 | 9 | 2   | 4192  | 1  | 99.28  |
| 809 | 3_WT.nd2 | 9 | 3   | 3244  | 1  | 80.8   |
| 810 | 3_WT.nd2 | 9 | 4   | 4568  | 2  | 77.03  |
| 811 | 3_WT.nd2 | 9 | 5   | 3642  | 1  | 64.88  |
| 812 | 3_WT.nd2 | 9 | 6   | 7675  | 3  | 66.24  |
| 813 | 3_WT.nd2 | 9 | 7   | 5111  | 2  | 65.73  |
| 814 | 3_WT.nd2 | 9 | 8   | 4379  | 2  | 58.01  |
| 815 | 3_WT.nd2 | 9 | 9   | 3889  | 1  | 51.62  |
| 816 | 3_WT.nd2 | 9 | 10  | 3254  | 1  | 38.83  |

|     |          |   |    |       |    |       |
|-----|----------|---|----|-------|----|-------|
| 817 | 3_WT.nd2 | 9 | 11 | 3424  | 1  | 16    |
| 818 | 3_WT.nd2 | 9 | 12 | 4433  | 2  | 23.35 |
| 819 | 3_WT.nd2 | 9 | 13 | 5616  | 2  | 22.63 |
| 820 | 3_WT.nd2 | 9 | 14 | 3545  | 1  | 18.38 |
| 821 | 3_WT.nd2 | 9 | 15 | 5558  | 2  | 13.6  |
| 822 | 3_WT.nd2 | 9 | 16 | 7848  | 3  | 7.21  |
| 823 | 3_WT.nd2 | 9 | 17 | 12111 | 4  | 8.49  |
| 824 | 3_WT.nd2 | 9 | 18 | 3991  | 1  | 25.96 |
| 825 | 3_WT.nd2 | 9 | 19 | 7705  | 3  | 20.25 |
| 826 | 3_WT.nd2 | 9 | 20 | 7046  | 3  | 0     |
| 827 | 3_WT.nd2 | 9 | 21 | 8268  | 3  | 0     |
| 828 | 3_WT.nd2 | 9 | 22 | 9867  | 4  | 0     |
| 829 | 3_WT.nd2 | 9 | 23 | 7129  | 3  | 13.15 |
| 830 | 3_WT.nd2 | 9 | 24 | 3454  | 1  | 44    |
| 831 | 3_WT.nd2 | 9 | 25 | 8570  | 3  | 3     |
| 832 | 3_WT.nd2 | 9 | 26 | 4232  | 2  | 21.38 |
| 833 | 3_WT.nd2 | 9 | 27 | 5241  | 2  | 12    |
| 834 | 3_WT.nd2 | 9 | 28 | 8445  | 3  | 8     |
| 835 | 3_WT.nd2 | 9 | 29 | 3521  | 1  | 0     |
| 836 | 3_WT.nd2 | 9 | 30 | 2850  | 1  | 65    |
| 837 | 3_WT.nd2 | 9 | 31 | 4922  | 2  | 19.1  |
| 838 | 3_WT.nd2 | 9 | 32 | 4217  | 1  | 24.04 |
| 839 | 3_WT.nd2 | 9 | 33 | 5870  | 2  | 21.38 |
| 840 | 3_WT.nd2 | 9 | 34 | 5061  | 2  | 29.73 |
| 841 | 3_WT.nd2 | 9 | 35 | 4305  | 2  | 50.33 |
| 842 | 3_WT.nd2 | 9 | 36 | 3037  | 1  | 42.06 |
| 843 | 3_WT.nd2 | 9 | 37 | 3551  | 1  | 36.24 |
| 844 | 3_WT.nd2 | 9 | 38 | 6644  | 2  | 38.9  |
| 845 | 3_WT.nd2 | 9 | 39 | 4391  | 2  | 22.85 |
| 846 | 3_WT.nd2 | 9 | 40 | 2886  | 1  | 64.5  |
| 847 | 3_WT.nd2 | 9 | 41 | 3295  | 1  | 32.28 |
| 848 | 3_WT.nd2 | 9 | 42 | 3014  | 1  | 5.1   |
| 849 | 3_WT.nd2 | 9 | 43 | 3949  | 1  | 10    |
| 850 | 3_WT.nd2 | 9 | 44 | 4238  | 2  | 77.13 |
| 851 | 3_WT.nd2 | 9 | 45 | 3618  | 1  | 6     |
| 852 | 3_WT.nd2 | 9 | 46 | 4370  | 2  | 0     |
| 853 | 3_WT.nd2 | 9 | 47 | 3052  | 1  | 3.61  |
| 854 | 3_WT.nd2 | 9 | 48 | 3420  | 1  | 99.32 |
| 855 | 3_WT.nd2 | 9 | 49 | 2760  | 1  | 70.71 |
| 856 | 3_WT.nd2 | 9 | 50 | 5943  | 2  | 10    |
| 857 | 3_WT.nd2 | 9 | 51 | 53772 | 19 | 13    |
| 858 | 3_WT.nd2 | 9 | 52 | 2941  | 1  | 92.76 |
| 859 | 3_WT.nd2 | 9 | 53 | 4972  | 2  | 20.88 |

|     |          |   |    |       |    |        |
|-----|----------|---|----|-------|----|--------|
| 860 | 3_WT.nd2 | 9 | 54 | 2763  | 1  | 31.95  |
| 861 | 3_WT.nd2 | 9 | 55 | 3088  | 1  | 78.82  |
| 862 | 3_WT.nd2 | 9 | 56 | 2630  | 1  | 151.03 |
| 863 | 3_WT.nd2 | 9 | 57 | 2824  | 1  | 124.79 |
| 864 | 3_WT.nd2 | 9 | 58 | 4606  | 2  | 154.74 |
| 865 | 3_WT.nd2 | 9 | 59 | 3112  | 1  | 115    |
| 866 | 3_WT.nd2 | 9 | 60 | 3026  | 1  | 112.18 |
| 867 | 3_WT.nd2 | 9 | 61 | 2984  | 1  | 165.22 |
| 868 | 3_WT.nd2 | 9 | 62 | 30743 | 11 | 158.46 |
| 869 | 3_WT.nd2 | 9 | 63 | 3326  | 1  | 102    |
| 870 | 3_WT.nd2 | 9 | 64 | 2863  | 1  | 137.44 |
| 871 | 3_WT.nd2 | 9 | 65 | 2243  | 1  | 98.23  |
| 872 | 3_WT.nd2 | 9 | 66 | 2854  | 1  | 57     |
| 873 | 3_WT.nd2 | 9 | 67 | 2414  | 1  | 82.28  |
| 874 | 3_WT.nd2 | 9 | 68 | 3412  | 1  | 0      |
| 875 | 3_WT.nd2 | 9 | 69 | 3868  | 1  | 69.18  |
| 876 | 3_WT.nd2 | 9 | 70 | 3131  | 1  | 107    |
| 877 | 3_WT.nd2 | 9 | 71 | 3348  | 1  | 22.02  |
| 878 | 3_WT.nd2 | 9 | 72 | 3126  | 1  | 31.06  |
| 879 | 3_WT.nd2 | 9 | 73 | 4194  | 1  | 89.36  |
| 880 | 3_WT.nd2 | 9 | 74 | 2685  | 1  | 121.2  |
| 881 | 3_WT.nd2 | 9 | 75 | 3147  | 1  | 18.6   |
| 882 | 3_WT.nd2 | 9 | 76 | 3024  | 1  | 110.94 |
| 883 | 3_WT.nd2 | 9 | 77 | 4062  | 1  | 116.73 |
| 884 | 3_WT.nd2 | 9 | 78 | 3599  | 1  | 62.13  |
| 885 | 3_WT.nd2 | 9 | 79 | 2756  | 1  | 212    |
| 886 | 3_WT.nd2 | 9 | 80 | 2693  | 1  | 213.19 |
| 887 | 3_WT.nd2 | 9 | 81 | 2909  | 1  | 85.09  |
| 888 | 3_WT.nd2 | 9 | 82 | 3112  | 1  | 89.84  |
| 889 | 3_WT.nd2 | 9 | 83 | 5532  | 2  | 219.58 |
| 890 | 3_WT.nd2 | 9 | 84 | 3327  | 1  | 17.72  |
| 891 | 3_WT.nd2 | 9 | 85 | 3552  | 1  | 135.77 |
| 892 | 3_WT.nd2 | 9 | 86 | 4489  | 2  | 10     |
| 893 | 3_WT.nd2 | 9 | 87 | 2417  | 1  | 234.92 |
| 894 | 3_WT.nd2 | 9 | 88 | 3336  | 1  | 14.87  |
| 895 | 3_WT.nd2 | 9 | 89 | 2542  | 1  | 194.26 |
| 896 | 3_WT.nd2 | 9 | 90 | 2855  | 1  | 244.64 |
| 897 | 3_WT.nd2 | 9 | 91 | 3087  | 1  | 101.4  |
| 898 | 3_WT.nd2 | 9 | 92 | 3148  | 1  | 235.31 |
| 899 | 3_WT.nd2 | 9 | 93 | 3273  | 1  | 241.42 |
| 900 | 3_WT.nd2 | 9 | 94 | 2842  | 1  | 246.91 |
| 901 | 3_WT.nd2 | 9 | 95 | 2530  | 1  | 248.6  |
| 902 | 3_WT.nd2 | 9 | 96 | 3646  | 1  | 149.34 |

|     |          |   |     |       |    |        |
|-----|----------|---|-----|-------|----|--------|
| 903 | 3_WT.nd2 | 9 | 97  | 2686  | 1  | 249.1  |
| 904 | 3_WT.nd2 | 9 | 98  | 4303  | 2  | 158    |
| 905 | 3_WT.nd2 | 9 | 99  | 3394  | 1  | 156    |
| 906 | 3_WT.nd2 | 9 | 100 | 3439  | 1  | 256.32 |
| 907 | 3_WT.nd2 | 9 | 101 | 3022  | 1  | 259.95 |
| 908 | 3_WT.nd2 | 9 | 102 | 3521  | 1  | 0      |
| 909 | 3_WT.nd2 | 9 | 103 | 3319  | 1  | 258.14 |
| 910 | 3_WT.nd2 | 9 | 104 | 2919  | 1  | 228    |
| 911 | 3_WT.nd2 | 9 | 105 | 3480  | 1  | 256.12 |
| 912 | 3_WT.nd2 | 9 | 106 | 3621  | 1  | 138    |
| 913 | 3_WT.nd2 | 9 | 107 | 8233  | 3  | 65     |
| 914 | 3_WT.nd2 | 9 | 108 | 3522  | 1  | 77.06  |
| 915 | 3_WT.nd2 | 9 | 109 | 3089  | 1  | 255.55 |
| 916 | 3_WT.nd2 | 9 | 110 | 4424  | 2  | 257.17 |
| 917 | 3_WT.nd2 | 9 | 111 | 2362  | 1  | 193    |
| 918 | 3_WT.nd2 | 9 | 112 | 4013  | 1  | 261.98 |
| 919 | 3_WT.nd2 | 9 | 113 | 3955  | 1  | 264.28 |
| 920 | 3_WT.nd2 | 9 | 114 | 4154  | 1  | 262.27 |
| 921 | 3_WT.nd2 | 9 | 115 | 3032  | 1  | 268.87 |
| 922 | 3_WT.nd2 | 9 | 116 | 3953  | 1  | 0      |
| 923 | 3_WT.nd2 | 9 | 117 | 8077  | 3  | 7.07   |
| 924 | 3_WT.nd2 | 9 | 118 | 2857  | 1  | 260.73 |
| 925 | 3_WT.nd2 | 9 | 119 | 4830  | 2  | 267.78 |
| 926 | 3_WT.nd2 | 9 | 120 | 3046  | 1  | 263.87 |
| 927 | 3_WT.nd2 | 9 | 121 | 3814  | 1  | 267.76 |
| 928 | 3_WT.nd2 | 9 | 122 | 5372  | 2  | 265.38 |
| 929 | 3_WT.nd2 | 9 | 123 | 2670  | 1  | 112    |
| 930 | 3_WT.nd2 | 9 | 124 | 3369  | 1  | 61     |
| 931 | 3_WT.nd2 | 9 | 125 | 4458  | 2  | 272.25 |
| 932 | 3_WT.nd2 | 9 | 126 | 4201  | 1  | 157.55 |
| 933 | 3_WT.nd2 | 9 | 127 | 3406  | 1  | 270.3  |
| 934 | 3_WT.nd2 | 9 | 128 | 3908  | 1  | 275.28 |
| 935 | 3_WT.nd2 | 9 | 129 | 3577  | 1  | 15.52  |
| 936 | 3_WT.nd2 | 9 | 130 | 3401  | 1  | 276.64 |
| 937 | 3_WT.nd2 | 9 | 131 | 4426  | 2  | 170.07 |
| 938 | 3_WT.nd2 | 9 | 132 | 6406  | 2  | 24.7   |
| 939 | 3_WT.nd2 | 9 | 133 | 6101  | 2  | 82.15  |
| 940 | 3_WT.nd2 | 9 | 134 | 3613  | 1  | 246.05 |
| 941 | 3_WT.nd2 | 9 | 135 | 4392  | 2  | 157.2  |
| 942 | 3_WT.nd2 | 9 | 136 | 9185  | 3  | 31.89  |
| 943 | 3_WT.nd2 | 9 | 137 | 4239  | 2  | 46.53  |
| 944 | 3_WT.nd2 | 9 | 138 | 67323 | 24 | 56.44  |
| 945 | 3_WT.nd2 | 9 | 139 | 7663  | 3  | 61.4   |

|     |          |    |     |       |    |        |
|-----|----------|----|-----|-------|----|--------|
| 946 | 3_WT.nd2 | 9  | 140 | 6875  | 2  | 66.37  |
| 947 | 3_WT.nd2 | 9  | 141 | 3437  | 1  | 79.31  |
| 948 | 3_WT.nd2 | 9  | 142 | 66608 | 24 | 156.03 |
| 949 | 3_WT.nd2 | 9  | 143 | 8582  | 3  | 38.6   |
| 950 | 3_WT.nd2 | 9  | 144 | 9109  | 3  | 44.72  |
| 951 | 3_WT.nd2 | 9  | 145 | 6064  | 2  | 72.99  |
| 952 | 3_WT.nd2 | 9  | 146 | 4115  | 1  | 79.63  |
| 953 | 3_WT.nd2 | 9  | 147 | 2847  | 1  | 277.09 |
| 954 | 3_WT.nd2 | 9  | 148 | 2815  | 1  | 70.61  |
| 955 | 3_WT.nd2 | 9  | 149 | 5299  | 2  | 156.73 |
| 956 | 3_WT.nd2 | 9  | 150 | 3331  | 1  | 255.71 |
| 957 | 3_WT.nd2 | 9  | 151 | 3158  | 1  | 267.37 |
| 958 | 3_WT.nd2 | 9  | 152 | 2965  | 1  | 282.46 |
| 959 | 3_WT.nd2 | 9  | 153 | 2602  | 1  | 209.95 |
| 960 | 3_WT.nd2 | 9  | 154 | 2863  | 1  | 246.89 |
| 961 | 3_WT.nd2 | 9  | 155 | 3891  | 1  | 227.07 |
| 962 | 3_WT.nd2 | 9  | 156 | 2917  | 1  | 30.41  |
| 963 | 3_WT.nd2 | 9  | 157 | 3532  | 1  | 260.5  |
| 964 | 3_WT.nd2 | 9  | 158 | 2654  | 1  | 56.32  |
| 965 | 3_WT.nd2 | 9  | 159 | 4684  | 2  | 73     |
| 966 | 3_WT.nd2 | 9  | 160 | 10140 | 4  | 95.27  |
| 967 | 3_WT.nd2 | 9  | 161 | 4603  | 2  | 112.45 |
| 968 | 3_WT.nd2 | 9  | 162 | 2722  | 1  | 204.82 |
| 969 | 3_WT.nd2 | 9  | 163 | 4780  | 2  | 112.8  |
| 970 | 3_WT.nd2 | 9  | 164 | 4072  | 1  | 124.48 |
| 971 | 3_WT.nd2 | 10 | 1   | 2829  | 1  | 591.22 |
| 972 | 3_WT.nd2 | 10 | 2   | 3079  | 1  | 424.32 |
| 973 | 3_WT.nd2 | 10 | 3   | 5341  | 2  | 416.61 |
| 974 | 3_WT.nd2 | 10 | 4   | 4473  | 2  | 387.49 |
| 975 | 3_WT.nd2 | 10 | 5   | 7010  | 2  | 393.69 |
| 976 | 3_WT.nd2 | 10 | 6   | 2754  | 1  | 248.65 |
| 977 | 3_WT.nd2 | 10 | 7   | 2778  | 1  | 194.26 |
| 978 | 3_WT.nd2 | 10 | 8   | 2639  | 1  | 202.39 |
| 979 | 3_WT.nd2 | 10 | 9   | 3220  | 1  | 191.86 |
| 980 | 3_WT.nd2 | 10 | 10  | 4022  | 1  | 182.89 |
| 981 | 3_WT.nd2 | 10 | 11  | 3029  | 1  | 179.77 |
| 982 | 3_WT.nd2 | 10 | 12  | 3946  | 1  | 171.48 |
| 983 | 3_WT.nd2 | 10 | 13  | 2792  | 1  | 104.62 |
| 984 | 3_WT.nd2 | 10 | 14  | 3118  | 1  | 164.84 |
| 985 | 3_WT.nd2 | 10 | 15  | 3018  | 1  | 88.6   |
| 986 | 3_WT.nd2 | 10 | 16  | 3345  | 1  | 83.55  |
| 987 | 3_WT.nd2 | 10 | 17  | 3629  | 1  | 90.25  |
| 988 | 3_WT.nd2 | 10 | 18  | 3168  | 1  | 168.76 |

|      |          |    |    |       |    |        |
|------|----------|----|----|-------|----|--------|
| 989  | 3_WT.nd2 | 10 | 19 | 4259  | 2  | 81.01  |
| 990  | 3_WT.nd2 | 10 | 20 | 3230  | 1  | 84.65  |
| 991  | 3_WT.nd2 | 10 | 21 | 4243  | 2  | 85.62  |
| 992  | 3_WT.nd2 | 10 | 22 | 5554  | 2  | 154.35 |
| 993  | 3_WT.nd2 | 10 | 23 | 3273  | 1  | 79.61  |
| 994  | 3_WT.nd2 | 10 | 24 | 3270  | 1  | 155.55 |
| 995  | 3_WT.nd2 | 10 | 25 | 3233  | 1  | 153.68 |
| 996  | 3_WT.nd2 | 10 | 26 | 2786  | 1  | 162.16 |
| 997  | 3_WT.nd2 | 10 | 27 | 3699  | 1  | 155.64 |
| 998  | 3_WT.nd2 | 10 | 28 | 3945  | 1  | 148.48 |
| 999  | 3_WT.nd2 | 10 | 29 | 2792  | 1  | 146.54 |
| 1000 | 3_WT.nd2 | 10 | 30 | 2877  | 1  | 144.18 |
| 1001 | 3_WT.nd2 | 10 | 31 | 2886  | 1  | 134.35 |
| 1002 | 3_WT.nd2 | 10 | 32 | 3496  | 1  | 22     |
| 1003 | 3_WT.nd2 | 10 | 33 | 35736 | 13 | 13.04  |
| 1004 | 3_WT.nd2 | 10 | 34 | 3068  | 1  | 26.63  |
| 1005 | 3_WT.nd2 | 10 | 35 | 2436  | 1  | 34.93  |
| 1006 | 3_WT.nd2 | 10 | 36 | 5121  | 2  | 6.4    |
| 1007 | 3_WT.nd2 | 10 | 37 | 2604  | 1  | 115    |
| 1008 | 3_WT.nd2 | 10 | 38 | 4108  | 1  | 9      |
| 1009 | 3_WT.nd2 | 10 | 39 | 3103  | 1  | 18     |
| 1010 | 3_WT.nd2 | 10 | 40 | 6487  | 2  | 0      |
| 1011 | 3_WT.nd2 | 10 | 41 | 3118  | 1  | 25.3   |
| 1012 | 3_WT.nd2 | 10 | 42 | 2523  | 1  | 40.11  |
| 1013 | 3_WT.nd2 | 10 | 43 | 2579  | 1  | 51.79  |
| 1014 | 3_WT.nd2 | 10 | 44 | 2474  | 1  | 46.75  |
| 1015 | 3_WT.nd2 | 10 | 45 | 5170  | 2  | 62.94  |
| 1016 | 3_WT.nd2 | 10 | 46 | 3411  | 1  | 55.95  |
| 1017 | 3_WT.nd2 | 10 | 47 | 3316  | 1  | 74.33  |
| 1018 | 3_WT.nd2 | 10 | 48 | 2707  | 1  | 5.83   |
| 1019 | 3_WT.nd2 | 10 | 49 | 4157  | 1  | 1      |
| 1020 | 3_WT.nd2 | 10 | 50 | 3370  | 1  | 71.22  |
| 1021 | 3_WT.nd2 | 10 | 51 | 4919  | 2  | 68.96  |
| 1022 | 3_WT.nd2 | 10 | 52 | 4094  | 1  | 34.93  |
| 1023 | 3_WT.nd2 | 10 | 53 | 3633  | 1  | 22.8   |
| 1024 | 3_WT.nd2 | 10 | 54 | 3211  | 1  | 12.65  |
| 1025 | 3_WT.nd2 | 10 | 55 | 2449  | 1  | 31.06  |
| 1026 | 3_WT.nd2 | 10 | 56 | 3279  | 1  | 24.04  |
| 1027 | 3_WT.nd2 | 10 | 57 | 3199  | 1  | 29.97  |
| 1028 | 3_WT.nd2 | 10 | 58 | 2751  | 1  | 31.02  |
| 1029 | 3_WT.nd2 | 10 | 59 | 5144  | 2  | 42.64  |
| 1030 | 3_WT.nd2 | 10 | 60 | 3877  | 1  | 38     |
| 1031 | 3_WT.nd2 | 10 | 61 | 2690  | 1  | 68.12  |



|      |          |    |    |       |    |        |
|------|----------|----|----|-------|----|--------|
| 1032 | 3_WT.nd2 | 10 | 62 | 2794  | 1  | 89.05  |
| 1033 | 3_WT.nd2 | 10 | 63 | 3866  | 1  | 95.13  |
| 1034 | 3_WT.nd2 | 10 | 64 | 2385  | 1  | 151.11 |
| 1035 | 3_WT.nd2 | 10 | 65 | 2622  | 1  | 281.81 |
| 1036 | 3_WT.nd2 | 10 | 66 | 2807  | 1  | 299.02 |
| 1037 | 3_WT.nd2 | 10 | 67 | 4306  | 2  | 390.39 |
| 1038 | 3_WT.nd2 | 11 | 1  | 2269  | 1  | 164.1  |
| 1039 | 3_WT.nd2 | 11 | 2  | 3354  | 1  | 71.2   |
| 1040 | 3_WT.nd2 | 11 | 3  | 4188  | 1  | 326.14 |
| 1041 | 3_WT.nd2 | 11 | 4  | 2590  | 1  | 0      |
| 1042 | 3_WT.nd2 | 11 | 5  | 2631  | 1  | 0      |
| 1043 | 3_WT.nd2 | 11 | 6  | 3731  | 1  | 26.02  |
| 1044 | 3_WT.nd2 | 11 | 7  | 2930  | 1  | 37.11  |
| 1045 | 3_WT.nd2 | 11 | 8  | 2714  | 1  | 46.17  |
| 1046 | 3_WT.nd2 | 11 | 9  | 2529  | 1  | 42.95  |
| 1047 | 3_WT.nd2 | 11 | 10 | 2775  | 1  | 15.26  |
| 1048 | 3_WT.nd2 | 11 | 11 | 2613  | 1  | 62.51  |
| 1049 | 3_WT.nd2 | 11 | 12 | 3810  | 1  | 8.49   |
| 1050 | 3_WT.nd2 | 11 | 13 | 3720  | 1  | 7.07   |
| 1051 | 3_WT.nd2 | 11 | 14 | 2668  | 1  | 55.54  |
| 1052 | 3_WT.nd2 | 11 | 15 | 2875  | 1  | 28.23  |
| 1053 | 3_WT.nd2 | 11 | 16 | 3173  | 1  | 38.28  |
| 1054 | 3_WT.nd2 | 11 | 17 | 39695 | 14 | 10     |
| 1055 | 3_WT.nd2 | 11 | 18 | 3200  | 1  | 14     |
| 1056 | 3_WT.nd2 | 11 | 19 | 3735  | 1  | 26.87  |
| 1057 | 3_WT.nd2 | 11 | 20 | 3377  | 1  | 25.46  |
| 1058 | 3_WT.nd2 | 11 | 21 | 2754  | 1  | 34.21  |
| 1059 | 3_WT.nd2 | 11 | 22 | 3655  | 1  | 21.02  |
| 1060 | 3_WT.nd2 | 11 | 23 | 3176  | 1  | 24.21  |
| 1061 | 3_WT.nd2 | 11 | 24 | 2755  | 1  | 36.88  |
| 1062 | 3_WT.nd2 | 11 | 25 | 3304  | 1  | 34.48  |
| 1063 | 3_WT.nd2 | 11 | 26 | 2954  | 1  | 177.88 |
| 1064 | 3_WT.nd2 | 11 | 27 | 2643  | 1  | 46.27  |
| 1065 | 3_WT.nd2 | 11 | 28 | 3395  | 1  | 135.93 |
| 1066 | 3_WT.nd2 | 11 | 29 | 4187  | 1  | 83.19  |
| 1067 | 3_WT.nd2 | 11 | 30 | 4352  | 2  | 74.24  |
| 1068 | 3_WT.nd2 | 11 | 31 | 2538  | 1  | 73.55  |
| 1069 | 3_WT.nd2 | 11 | 32 | 4529  | 2  | 70     |
| 1070 | 3_WT.nd2 | 11 | 33 | 3460  | 1  | 56.52  |
| 1071 | 3_WT.nd2 | 11 | 34 | 4277  | 2  | 99.5   |
| 1072 | 3_WT.nd2 | 11 | 35 | 2428  | 1  | 124.02 |
| 1073 | 3_WT.nd2 | 11 | 36 | 6109  | 2  | 51.97  |
| 1074 | 3_WT.nd2 | 11 | 37 | 5014  | 2  | 47.85  |

|      |          |    |    |       |    |        |
|------|----------|----|----|-------|----|--------|
| 1075 | 3_WT.nd2 | 11 | 38 | 2620  | 1  | 114.86 |
| 1076 | 3_WT.nd2 | 11 | 39 | 36861 | 13 | 39     |
| 1077 | 3_WT.nd2 | 11 | 40 | 2672  | 1  | 80.26  |
| 1078 | 3_WT.nd2 | 11 | 41 | 2936  | 1  | 35.47  |
| 1079 | 3_WT.nd2 | 11 | 42 | 2682  | 1  | 53.01  |
| 1080 | 3_WT.nd2 | 11 | 43 | 4461  | 2  | 97.67  |
| 1081 | 3_WT.nd2 | 11 | 44 | 2406  | 1  | 65.39  |
| 1082 | 3_WT.nd2 | 11 | 45 | 3217  | 1  | 23     |
| 1083 | 3_WT.nd2 | 11 | 46 | 2373  | 1  | 24.35  |
| 1084 | 3_WT.nd2 | 11 | 47 | 2799  | 1  | 8.54   |
| 1085 | 3_WT.nd2 | 11 | 48 | 2320  | 1  | 83.87  |
| 1086 | 3_WT.nd2 | 11 | 49 | 4920  | 2  | 61.07  |
| 1087 | 3_WT.nd2 | 11 | 50 | 4738  | 2  | 16     |
| 1088 | 3_WT.nd2 | 11 | 51 | 3623  | 1  | 64     |
| 1089 | 3_WT.nd2 | 11 | 52 | 3334  | 1  | 24.19  |
| 1090 | 3_WT.nd2 | 11 | 53 | 2947  | 1  | 38     |
| 1091 | 3_WT.nd2 | 11 | 54 | 2869  | 1  | 34.37  |
| 1092 | 3_WT.nd2 | 11 | 55 | 4253  | 2  | 8.25   |
| 1093 | 3_WT.nd2 | 11 | 56 | 3498  | 1  | 32.53  |
| 1094 | 3_WT.nd2 | 11 | 57 | 3156  | 1  | 36.4   |
| 1095 | 3_WT.nd2 | 11 | 58 | 4907  | 2  | 15     |
| 1096 | 3_WT.nd2 | 11 | 59 | 3599  | 1  | 17     |
| 1097 | 3_WT.nd2 | 11 | 60 | 4207  | 1  | 19     |
| 1098 | 3_WT.nd2 | 11 | 61 | 2559  | 1  | 74.67  |
| 1099 | 3_WT.nd2 | 11 | 62 | 3488  | 1  | 27.89  |
| 1100 | 3_WT.nd2 | 11 | 63 | 2930  | 1  | 82.05  |
| 1101 | 3_WT.nd2 | 11 | 64 | 3317  | 1  | 3.61   |
| 1102 | 3_WT.nd2 | 11 | 65 | 2500  | 1  | 71     |
| 1103 | 3_WT.nd2 | 11 | 66 | 2645  | 1  | 46.01  |
| 1104 | 3_WT.nd2 | 11 | 67 | 3186  | 1  | 36     |
| 1105 | 3_WT.nd2 | 11 | 68 | 3023  | 1  | 79.63  |
| 1106 | 3_WT.nd2 | 11 | 69 | 2992  | 1  | 11.31  |
| 1107 | 3_WT.nd2 | 11 | 70 | 3712  | 1  | 13.45  |
| 1108 | 3_WT.nd2 | 11 | 71 | 2805  | 1  | 92.72  |
| 1109 | 3_WT.nd2 | 11 | 72 | 3811  | 1  | 40.5   |
| 1110 | 3_WT.nd2 | 11 | 73 | 4976  | 2  | 28.43  |
| 1111 | 3_WT.nd2 | 11 | 74 | 3191  | 1  | 36.77  |
| 1112 | 3_WT.nd2 | 11 | 75 | 2498  | 1  | 42.64  |
| 1113 | 3_WT.nd2 | 11 | 76 | 4077  | 1  | 21     |
| 1114 | 3_WT.nd2 | 11 | 77 | 3720  | 1  | 21.02  |
| 1115 | 3_WT.nd2 | 11 | 78 | 4453  | 2  | 23.77  |
| 1116 | 3_WT.nd2 | 11 | 79 | 5908  | 2  | 58.01  |
| 1117 | 3_WT.nd2 | 11 | 80 | 2853  | 1  | 38.83  |

|      |          |    |     |       |    |        |
|------|----------|----|-----|-------|----|--------|
| 1118 | 3_WT.nd2 | 11 | 81  | 2890  | 1  | 36     |
| 1119 | 3_WT.nd2 | 11 | 82  | 3632  | 1  | 60.3   |
| 1120 | 3_WT.nd2 | 11 | 83  | 3227  | 1  | 61     |
| 1121 | 3_WT.nd2 | 11 | 84  | 2926  | 1  | 61.98  |
| 1122 | 3_WT.nd2 | 11 | 85  | 2594  | 1  | 70.23  |
| 1123 | 3_WT.nd2 | 11 | 86  | 2734  | 1  | 119.21 |
| 1124 | 3_WT.nd2 | 11 | 87  | 2673  | 1  | 71.47  |
| 1125 | 3_WT.nd2 | 11 | 88  | 3619  | 1  | 74.33  |
| 1126 | 3_WT.nd2 | 11 | 89  | 3105  | 1  | 84.6   |
| 1127 | 3_WT.nd2 | 11 | 90  | 3613  | 1  | 79.43  |
| 1128 | 3_WT.nd2 | 11 | 91  | 3480  | 1  | 111.4  |
| 1129 | 3_WT.nd2 | 11 | 92  | 2743  | 1  | 88.77  |
| 1130 | 3_WT.nd2 | 11 | 93  | 3945  | 1  | 119.2  |
| 1131 | 3_WT.nd2 | 11 | 94  | 2990  | 1  | 89     |
| 1132 | 3_WT.nd2 | 11 | 95  | 3986  | 1  | 95.34  |
| 1133 | 3_WT.nd2 | 11 | 96  | 4845  | 2  | 218.56 |
| 1134 | 3_WT.nd2 | 11 | 97  | 2874  | 1  | 216.67 |
| 1135 | 3_WT.nd2 | 11 | 98  | 2575  | 1  | 255.2  |
| 1136 | 3_WT.nd2 | 11 | 99  | 2717  | 1  | 218.79 |
| 1137 | 3_WT.nd2 | 11 | 100 | 3209  | 1  | 319.13 |
| 1138 | 3_WT.nd2 | 11 | 101 | 2974  | 1  | 230.99 |
| 1139 | 3_WT.nd2 | 11 | 102 | 3494  | 1  | 263.76 |
| 1140 | 3_WT.nd2 | 11 | 103 | 2877  | 1  | 252.29 |
| 1141 | 3_WT.nd2 | 11 | 104 | 2988  | 1  | 287.62 |
| 1142 | 3_WT.nd2 | 11 | 105 | 2957  | 1  | 288.29 |
| 1143 | 3_WT.nd2 | 11 | 106 | 2633  | 1  | 305.16 |
| 1144 | 3_WT.nd2 | 11 | 107 | 3627  | 1  | 262.94 |
| 1145 | 3_WT.nd2 | 11 | 108 | 2325  | 1  | 282.45 |
| 1146 | 3_WT.nd2 | 11 | 109 | 3398  | 1  | 262.55 |
| 1147 | 3_WT.nd2 | 11 | 110 | 3910  | 1  | 350.86 |
| 1148 | 3_WT.nd2 | 12 | 1   | 2815  | 1  | 230.99 |
| 1149 | 3_WT.nd2 | 12 | 2   | 2927  | 1  | 223.91 |
| 1150 | 3_WT.nd2 | 12 | 3   | 2561  | 1  | 269.67 |
| 1151 | 3_WT.nd2 | 12 | 4   | 2623  | 1  | 222.03 |
| 1152 | 3_WT.nd2 | 12 | 5   | 3995  | 1  | 220.79 |
| 1153 | 3_WT.nd2 | 12 | 6   | 3280  | 1  | 227.64 |
| 1154 | 3_WT.nd2 | 12 | 7   | 3345  | 1  | 232.62 |
| 1155 | 3_WT.nd2 | 12 | 8   | 45416 | 16 | 233.03 |
| 1156 | 3_WT.nd2 | 12 | 9   | 3022  | 1  | 249.1  |
| 1157 | 3_WT.nd2 | 12 | 10  | 3439  | 1  | 230.14 |
| 1158 | 3_WT.nd2 | 12 | 11  | 3220  | 1  | 267    |
| 1159 | 3_WT.nd2 | 12 | 12  | 2541  | 1  | 600    |
| 1160 | 3_WT.nd2 | 12 | 13  | 3086  | 1  | 249    |

|      |          |    |    |      |   |        |
|------|----------|----|----|------|---|--------|
| 1161 | 3_WT.nd2 | 12 | 14 | 3158 | 1 | 252.01 |
| 1162 | 3_WT.nd2 | 12 | 15 | 3051 | 1 | 260.16 |
| 1163 | 3_WT.nd2 | 12 | 16 | 2909 | 1 | 444.03 |
| 1164 | 3_WT.nd2 | 12 | 17 | 3949 | 1 | 266.68 |
| 1165 | 3_WT.nd2 | 12 | 18 | 2882 | 1 | 341.12 |
| 1166 | 3_WT.nd2 | 12 | 19 | 3913 | 1 | 435.17 |
| 1167 | 3_WT.nd2 | 12 | 20 | 4534 | 2 | 268.82 |
| 1168 | 3_WT.nd2 | 12 | 21 | 3328 | 1 | 428.3  |
| 1169 | 3_WT.nd2 | 12 | 22 | 2611 | 1 | 198.73 |
| 1170 | 3_WT.nd2 | 12 | 23 | 2720 | 1 | 394.37 |
| 1171 | 3_WT.nd2 | 12 | 24 | 3943 | 1 | 423.43 |
| 1172 | 3_WT.nd2 | 12 | 25 | 3185 | 1 | 277.74 |
| 1173 | 3_WT.nd2 | 12 | 26 | 3285 | 1 | 314.92 |
| 1174 | 3_WT.nd2 | 12 | 27 | 3795 | 1 | 413.76 |
| 1175 | 3_WT.nd2 | 12 | 28 | 3026 | 1 | 367.99 |
| 1176 | 3_WT.nd2 | 12 | 29 | 3312 | 1 | 404.27 |
| 1177 | 3_WT.nd2 | 12 | 30 | 4382 | 2 | 394.38 |
| 1178 | 3_WT.nd2 | 12 | 31 | 2768 | 1 | 345.68 |
| 1179 | 3_WT.nd2 | 12 | 32 | 3254 | 1 | 374.36 |
| 1180 | 3_WT.nd2 | 12 | 33 | 3128 | 1 | 297.31 |
| 1181 | 3_WT.nd2 | 12 | 34 | 3452 | 1 | 353.55 |
| 1182 | 3_WT.nd2 | 12 | 35 | 3077 | 1 | 389.27 |
| 1183 | 3_WT.nd2 | 12 | 36 | 3492 | 1 | 313.11 |
| 1184 | 3_WT.nd2 | 12 | 37 | 3825 | 1 | 367.02 |
| 1185 | 3_WT.nd2 | 12 | 38 | 4655 | 2 | 325.58 |
| 1186 | 3_WT.nd2 | 12 | 39 | 3520 | 1 | 336.05 |
| 1187 | 3_WT.nd2 | 12 | 40 | 4545 | 2 | 337.92 |
| 1188 | 3_WT.nd2 | 12 | 41 | 3643 | 1 | 356.81 |
| 1189 | 3_WT.nd2 | 12 | 42 | 5200 | 2 | 348.31 |
| 1190 | 3_WT.nd2 | 12 | 43 | 3140 | 1 | 58.31  |
| 1191 | 3_WT.nd2 | 12 | 44 | 6581 | 2 | 363.33 |
| 1192 | 3_WT.nd2 | 12 | 45 | 3777 | 1 | 366.23 |
| 1193 | 3_WT.nd2 | 12 | 46 | 2528 | 1 | 672.18 |
| 1194 | 3_WT.nd2 | 12 | 47 | 2723 | 1 | 499.31 |
| 1195 | 3_WT.nd2 | 13 | 1  | 2548 | 1 | 189.26 |
| 1196 | 3_WT.nd2 | 13 | 2  | 2786 | 1 | 82.73  |
| 1197 | 3_WT.nd2 | 13 | 3  | 2744 | 1 | 76     |
| 1198 | 3_WT.nd2 | 13 | 4  | 2450 | 1 | 67.74  |
| 1199 | 3_WT.nd2 | 13 | 5  | 3470 | 1 | 62.2   |
| 1200 | 3_WT.nd2 | 13 | 6  | 2511 | 1 | 77.62  |
| 1201 | 3_WT.nd2 | 13 | 7  | 2434 | 1 | 69.46  |
| 1202 | 3_WT.nd2 | 13 | 8  | 2452 | 1 | 176.48 |
| 1203 | 3_WT.nd2 | 13 | 9  | 2842 | 1 | 247.16 |

|      |          |    |    |       |    |        |
|------|----------|----|----|-------|----|--------|
| 1204 | 3_WT.nd2 | 13 | 10 | 3237  | 1  | 248.02 |
| 1205 | 3_WT.nd2 | 13 | 11 | 2539  | 1  | 245.49 |
| 1206 | 3_WT.nd2 | 13 | 12 | 2930  | 1  | 241.62 |
| 1207 | 3_WT.nd2 | 13 | 13 | 2707  | 1  | 48.17  |
| 1208 | 3_WT.nd2 | 13 | 14 | 3021  | 1  | 63.69  |
| 1209 | 3_WT.nd2 | 13 | 15 | 2753  | 1  | 47     |
| 1210 | 3_WT.nd2 | 13 | 16 | 40596 | 14 | 41.15  |
| 1211 | 3_WT.nd2 | 13 | 17 | 2515  | 1  | 33.14  |
| 1212 | 3_WT.nd2 | 13 | 18 | 2496  | 1  | 33.38  |
| 1213 | 3_WT.nd2 | 13 | 19 | 2433  | 1  | 162.98 |
| 1214 | 3_WT.nd2 | 13 | 20 | 2931  | 1  | 90.08  |
| 1215 | 3_WT.nd2 | 13 | 21 | 2981  | 1  | 99.37  |
| 1216 | 3_WT.nd2 | 13 | 22 | 2384  | 1  | 166.63 |
| 1217 | 3_WT.nd2 | 13 | 23 | 3226  | 1  | 39.6   |
| 1218 | 3_WT.nd2 | 13 | 24 | 3638  | 1  | 73.82  |
| 1219 | 3_WT.nd2 | 13 | 25 | 40869 | 15 | 64.5   |
| 1220 | 3_WT.nd2 | 13 | 26 | 2585  | 1  | 138.28 |
| 1221 | 3_WT.nd2 | 13 | 27 | 2897  | 1  | 49.24  |
| 1222 | 3_WT.nd2 | 13 | 28 | 3190  | 1  | 156.18 |
| 1223 | 3_WT.nd2 | 13 | 29 | 3050  | 1  | 51.08  |
| 1224 | 3_WT.nd2 | 13 | 30 | 2571  | 1  | 84.53  |
| 1225 | 3_WT.nd2 | 13 | 31 | 2312  | 1  | 172.57 |
| 1226 | 3_WT.nd2 | 13 | 32 | 2678  | 1  | 144.42 |
| 1227 | 3_WT.nd2 | 13 | 33 | 54518 | 19 | 119.42 |
| 1228 | 3_WT.nd2 | 13 | 34 | 3014  | 1  | 99.85  |
| 1229 | 3_WT.nd2 | 13 | 35 | 3304  | 1  | 96     |
| 1230 | 3_WT.nd2 | 13 | 36 | 3390  | 1  | 110    |
| 1231 | 3_WT.nd2 | 13 | 37 | 2996  | 1  | 81     |
| 1232 | 3_WT.nd2 | 13 | 38 | 2560  | 1  | 71     |
| 1233 | 3_WT.nd2 | 13 | 39 | 2527  | 1  | 74.33  |
| 1234 | 3_WT.nd2 | 13 | 40 | 2922  | 1  | 88.57  |
| 1235 | 3_WT.nd2 | 13 | 41 | 3862  | 1  | 127.1  |
| 1236 | 3_WT.nd2 | 13 | 42 | 2722  | 1  | 97.49  |
| 1237 | 3_WT.nd2 | 13 | 43 | 2983  | 1  | 116.43 |
| 1238 | 3_WT.nd2 | 13 | 44 | 2359  | 1  | 3      |
| 1239 | 3_WT.nd2 | 13 | 45 | 2526  | 1  | 113.44 |
| 1240 | 3_WT.nd2 | 13 | 46 | 2912  | 1  | 145.62 |
| 1241 | 3_WT.nd2 | 13 | 47 | 2644  | 1  | 159.68 |
| 1242 | 3_WT.nd2 | 13 | 48 | 2639  | 1  | 140.13 |
| 1243 | 3_WT.nd2 | 13 | 49 | 2554  | 1  | 139.99 |
| 1244 | 3_WT.nd2 | 13 | 50 | 2690  | 1  | 147.5  |
| 1245 | 3_WT.nd2 | 13 | 51 | 2916  | 1  | 212.76 |
| 1246 | 3_WT.nd2 | 13 | 52 | 2508  | 1  | 174.1  |

|      |          |    |    |       |    |        |
|------|----------|----|----|-------|----|--------|
| 1247 | 3_WT.nd2 | 13 | 53 | 2309  | 1  | 0      |
| 1248 | 3_WT.nd2 | 13 | 54 | 2572  | 1  | 75.29  |
| 1249 | 3_WT.nd2 | 13 | 55 | 2975  | 1  | 23.71  |
| 1250 | 3_WT.nd2 | 13 | 56 | 4356  | 2  | 6.71   |
| 1251 | 3_WT.nd2 | 14 | 1  | 2672  | 1  | 281.26 |
| 1252 | 3_WT.nd2 | 14 | 2  | 4896  | 2  | 274.59 |
| 1253 | 3_WT.nd2 | 14 | 3  | 5527  | 2  | 270.9  |
| 1254 | 3_WT.nd2 | 14 | 4  | 4470  | 2  | 267.68 |
| 1255 | 3_WT.nd2 | 14 | 5  | 3932  | 1  | 261.31 |
| 1256 | 3_WT.nd2 | 14 | 6  | 4925  | 2  | 249.58 |
| 1257 | 3_WT.nd2 | 14 | 7  | 6226  | 2  | 240.88 |
| 1258 | 3_WT.nd2 | 14 | 8  | 4043  | 1  | 231.82 |
| 1259 | 3_WT.nd2 | 14 | 9  | 2447  | 1  | 18     |
| 1260 | 3_WT.nd2 | 14 | 10 | 2975  | 1  | 0      |
| 1261 | 3_WT.nd2 | 14 | 11 | 2468  | 1  | 119.08 |
| 1262 | 3_WT.nd2 | 14 | 12 | 2631  | 1  | 78.85  |
| 1263 | 3_WT.nd2 | 14 | 13 | 3233  | 1  | 82.28  |
| 1264 | 3_WT.nd2 | 14 | 14 | 2627  | 1  | 75.72  |
| 1265 | 3_WT.nd2 | 14 | 15 | 2371  | 1  | 57.72  |
| 1266 | 3_WT.nd2 | 14 | 16 | 2960  | 1  | 112    |
| 1267 | 3_WT.nd2 | 14 | 17 | 3223  | 1  | 81.99  |
| 1268 | 3_WT.nd2 | 14 | 18 | 2770  | 1  | 99.3   |
| 1269 | 3_WT.nd2 | 14 | 19 | 4217  | 1  | 28.86  |
| 1270 | 3_WT.nd2 | 14 | 20 | 3661  | 1  | 27.2   |
| 1271 | 3_WT.nd2 | 14 | 21 | 4154  | 1  | 23.26  |
| 1272 | 3_WT.nd2 | 14 | 22 | 2312  | 1  | 271.28 |
| 1273 | 3_WT.nd2 | 14 | 23 | 2453  | 1  | 257.93 |
| 1274 | 3_WT.nd2 | 14 | 24 | 3123  | 1  | 77.23  |
| 1275 | 3_WT.nd2 | 14 | 25 | 2863  | 1  | 4      |
| 1276 | 3_WT.nd2 | 14 | 26 | 2898  | 1  | 6.4    |
| 1277 | 3_WT.nd2 | 14 | 27 | 2773  | 1  | 0      |
| 1278 | 3_WT.nd2 | 14 | 28 | 2741  | 1  | 45     |
| 1279 | 3_WT.nd2 | 14 | 29 | 3030  | 1  | 39     |
| 1280 | 3_WT.nd2 | 14 | 30 | 2975  | 1  | 19.1   |
| 1281 | 3_WT.nd2 | 14 | 31 | 4587  | 2  | 17.03  |
| 1282 | 3_WT.nd2 | 14 | 32 | 4711  | 2  | 14.56  |
| 1283 | 3_WT.nd2 | 14 | 33 | 3769  | 1  | 14     |
| 1284 | 3_WT.nd2 | 14 | 34 | 45803 | 16 | 32.8   |
| 1285 | 3_WT.nd2 | 14 | 35 | 4572  | 2  | 20.1   |
| 1286 | 3_WT.nd2 | 14 | 36 | 3642  | 1  | 23.26  |
| 1287 | 3_WT.nd2 | 14 | 37 | 4147  | 1  | 24.7   |
| 1288 | 3_WT.nd2 | 14 | 38 | 4237  | 2  | 31.83  |
| 1289 | 3_WT.nd2 | 14 | 39 | 3934  | 1  | 39.6   |

|      |          |    |    |      |   |        |
|------|----------|----|----|------|---|--------|
| 1290 | 3_WT.nd2 | 14 | 40 | 4474 | 2 | 43.93  |
| 1291 | 3_WT.nd2 | 14 | 41 | 2942 | 1 | 52.8   |
| 1292 | 3_WT.nd2 | 14 | 42 | 3787 | 1 | 40.31  |
| 1293 | 3_WT.nd2 | 14 | 43 | 3773 | 1 | 52.63  |
| 1294 | 3_WT.nd2 | 14 | 44 | 3036 | 1 | 60.8   |
| 1295 | 3_WT.nd2 | 14 | 45 | 3547 | 1 | 10     |
| 1296 | 3_WT.nd2 | 14 | 46 | 4073 | 1 | 9.49   |
| 1297 | 3_WT.nd2 | 14 | 47 | 3001 | 1 | 26.4   |
| 1298 | 3_WT.nd2 | 14 | 48 | 2917 | 1 | 19.1   |
| 1299 | 3_WT.nd2 | 14 | 49 | 2455 | 1 | 0      |
| 1300 | 3_WT.nd2 | 14 | 50 | 2673 | 1 | 38     |
| 1301 | 3_WT.nd2 | 14 | 51 | 3475 | 1 | 0      |
| 1302 | 3_WT.nd2 | 14 | 52 | 3651 | 1 | 2      |
| 1303 | 3_WT.nd2 | 14 | 53 | 3157 | 1 | 11.4   |
| 1304 | 3_WT.nd2 | 14 | 54 | 4240 | 2 | 293    |
| 1305 | 3_WT.nd2 | 14 | 55 | 2948 | 1 | 0      |
| 1306 | 3_WT.nd2 | 14 | 56 | 2542 | 1 | 11.18  |
| 1307 | 3_WT.nd2 | 14 | 57 | 2927 | 1 | 295    |
| 1308 | 3_WT.nd2 | 14 | 58 | 3565 | 1 | 9.22   |
| 1309 | 3_WT.nd2 | 14 | 59 | 3024 | 1 | 0      |
| 1310 | 3_WT.nd2 | 14 | 60 | 2606 | 1 | 26.25  |
| 1311 | 3_WT.nd2 | 14 | 61 | 2757 | 1 | 10     |
| 1312 | 3_WT.nd2 | 14 | 62 | 2753 | 1 | 22.63  |
| 1313 | 3_WT.nd2 | 14 | 63 | 2880 | 1 | 13.04  |
| 1314 | 3_WT.nd2 | 14 | 64 | 3965 | 1 | 1      |
| 1315 | 3_WT.nd2 | 14 | 65 | 3546 | 1 | 5.1    |
| 1316 | 3_WT.nd2 | 14 | 66 | 2802 | 1 | 89.36  |
| 1317 | 3_WT.nd2 | 14 | 67 | 3152 | 1 | 27.29  |
| 1318 | 3_WT.nd2 | 14 | 68 | 3115 | 1 | 109.81 |
| 1319 | 3_WT.nd2 | 14 | 69 | 3271 | 1 | 133.15 |
| 1320 | 3_WT.nd2 | 14 | 70 | 3628 | 1 | 241    |
| 1321 | 3_WT.nd2 | 14 | 71 | 3026 | 1 | 150.23 |
| 1322 | 3_WT.nd2 | 14 | 72 | 3373 | 1 | 231.19 |
| 1323 | 3_WT.nd2 | 14 | 73 | 3132 | 1 | 248.09 |
| 1324 | 3_WT.nd2 | 14 | 74 | 4243 | 2 | 261.62 |
| 1325 | 3_WT.nd2 | 14 | 75 | 2943 | 1 | 267.03 |
| 1326 | 3_WT.nd2 | 14 | 76 | 2322 | 1 | 200.06 |
| 1327 | 3_WT.nd2 | 14 | 77 | 2314 | 1 | 211.46 |
| 1328 | 3_WT.nd2 | 14 | 78 | 3046 | 1 | 196.09 |
| 1329 | 3_WT.nd2 | 14 | 79 | 2634 | 1 | 268.87 |
| 1330 | 3_WT.nd2 | 14 | 80 | 4086 | 1 | 281.78 |
| 1331 | 3_WT.nd2 | 14 | 81 | 3124 | 1 | 0      |
| 1332 | 3_WT.nd2 | 14 | 82 | 3036 | 1 | 0      |

|      |          |    |    |      |   |        |
|------|----------|----|----|------|---|--------|
| 1333 | 3_WT.nd2 | 14 | 83 | 2837 | 1 | 14     |
| 1334 | 3_WT.nd2 | 14 | 84 | 2931 | 1 | 332.18 |
| 1335 | 3_WT.nd2 | 14 | 85 | 2531 | 1 | 188.29 |
| 1336 | 3_WT.nd2 | 14 | 86 | 3317 | 1 | 336.09 |
| 1337 | 3_WT.nd2 | 14 | 87 | 2958 | 1 | 90.92  |
| 1338 | 3_WT.nd2 | 14 | 88 | 2656 | 1 | 202.76 |
| 1339 | 3_WT.nd2 | 14 | 89 | 3315 | 1 | 108.05 |
| 1340 | 3_WT.nd2 | 14 | 90 | 2848 | 1 | 196.45 |
| 1341 | 3_WT.nd2 | 14 | 91 | 2931 | 1 | 189.74 |
| 1342 | 3_WT.nd2 | 14 | 92 | 2481 | 1 | 188.22 |
| 1343 | 3_WT.nd2 | 14 | 93 | 3099 | 1 | 119.04 |
| 1344 | 3_WT.nd2 | 14 | 94 | 2959 | 1 | 177.79 |
| 1345 | 3_WT.nd2 | 14 | 95 | 4153 | 1 | 72.45  |
| 1346 | 3_WT.nd2 | 15 | 1  | 2933 | 1 | 145    |
| 1347 | 3_WT.nd2 | 15 | 2  | 2748 | 1 | 153    |
| 1348 | 3_WT.nd2 | 15 | 3  | 3091 | 1 | 156    |
| 1349 | 3_WT.nd2 | 15 | 4  | 3511 | 1 | 148.31 |
| 1350 | 3_WT.nd2 | 15 | 5  | 2436 | 1 | 143.95 |
| 1351 | 3_WT.nd2 | 15 | 6  | 2639 | 1 | 59.3   |
| 1352 | 3_WT.nd2 | 15 | 7  | 2446 | 1 | 84.65  |
| 1353 | 3_WT.nd2 | 15 | 8  | 3776 | 1 | 89.05  |
| 1354 | 3_WT.nd2 | 15 | 9  | 2476 | 1 | 80.45  |
| 1355 | 3_WT.nd2 | 15 | 10 | 3124 | 1 | 94.87  |
| 1356 | 3_WT.nd2 | 15 | 11 | 4563 | 2 | 0      |
| 1357 | 3_WT.nd2 | 15 | 12 | 2811 | 1 | 0      |
| 1358 | 3_WT.nd2 | 15 | 13 | 2472 | 1 | 45.31  |
| 1359 | 3_WT.nd2 | 15 | 14 | 3519 | 1 | 15.23  |
| 1360 | 3_WT.nd2 | 15 | 15 | 3013 | 1 | 2.24   |
| 1361 | 3_WT.nd2 | 15 | 16 | 2711 | 1 | 2.24   |
| 1362 | 3_WT.nd2 | 15 | 17 | 2918 | 1 | 0      |
| 1363 | 3_WT.nd2 | 15 | 18 | 3181 | 1 | 53.81  |
| 1364 | 3_WT.nd2 | 15 | 19 | 2580 | 1 | 28.28  |
| 1365 | 3_WT.nd2 | 15 | 20 | 3360 | 1 | 31.14  |
| 1366 | 3_WT.nd2 | 15 | 21 | 3231 | 1 | 31.02  |
| 1367 | 3_WT.nd2 | 15 | 22 | 3119 | 1 | 26.17  |
| 1368 | 3_WT.nd2 | 15 | 23 | 3854 | 1 | 17.49  |
| 1369 | 3_WT.nd2 | 15 | 24 | 2706 | 1 | 19.1   |
| 1370 | 3_WT.nd2 | 15 | 25 | 2801 | 1 | 4      |
| 1371 | 3_WT.nd2 | 15 | 26 | 3588 | 1 | 5      |
| 1372 | 3_WT.nd2 | 15 | 27 | 2736 | 1 | 63.57  |
| 1373 | 3_WT.nd2 | 15 | 28 | 3406 | 1 | 14     |
| 1374 | 3_WT.nd2 | 15 | 29 | 3590 | 1 | 16.03  |
| 1375 | 3_WT.nd2 | 15 | 30 | 3317 | 1 | 10     |



|      |          |    |    |      |   |        |
|------|----------|----|----|------|---|--------|
| 1376 | 3_WT.nd2 | 15 | 31 | 6349 | 2 | 4      |
| 1377 | 3_WT.nd2 | 15 | 32 | 6038 | 2 | 0      |
| 1378 | 3_WT.nd2 | 15 | 33 | 5611 | 2 | 9.49   |
| 1379 | 3_WT.nd2 | 15 | 34 | 6428 | 2 | 0      |
| 1380 | 3_WT.nd2 | 15 | 35 | 5642 | 2 | 1      |
| 1381 | 3_WT.nd2 | 15 | 36 | 6721 | 2 | 5.66   |
| 1382 | 3_WT.nd2 | 15 | 37 | 3621 | 1 | 16.49  |
| 1383 | 3_WT.nd2 | 15 | 38 | 4815 | 2 | 14.87  |
| 1384 | 3_WT.nd2 | 15 | 39 | 7141 | 3 | 2.24   |
| 1385 | 3_WT.nd2 | 15 | 40 | 3244 | 1 | 40.16  |
| 1386 | 3_WT.nd2 | 15 | 41 | 3563 | 1 | 29.83  |
| 1387 | 3_WT.nd2 | 15 | 42 | 6231 | 2 | 27.31  |
| 1388 | 3_WT.nd2 | 15 | 43 | 2806 | 1 | 4      |
| 1389 | 3_WT.nd2 | 15 | 44 | 4056 | 1 | 36.25  |
| 1390 | 3_WT.nd2 | 15 | 45 | 6064 | 2 | 44.41  |
| 1391 | 3_WT.nd2 | 15 | 46 | 3492 | 1 | 310.54 |
| 1392 | 3_WT.nd2 | 15 | 47 | 4302 | 2 | 12.04  |
| 1393 | 3_WT.nd2 | 15 | 48 | 3908 | 1 | 56.4   |
| 1394 | 3_WT.nd2 | 15 | 49 | 3957 | 1 | 64.66  |
| 1395 | 3_WT.nd2 | 15 | 50 | 2744 | 1 | 330.24 |
| 1396 | 3_WT.nd2 | 15 | 51 | 2476 | 1 | 304.66 |
| 1397 | 3_WT.nd2 | 15 | 52 | 2438 | 1 | 321.21 |
| 1398 | 3_WT.nd2 | 15 | 53 | 3666 | 1 | 66.53  |
| 1399 | 3_WT.nd2 | 15 | 54 | 3275 | 1 | 20.1   |
| 1400 | 3_WT.nd2 | 15 | 55 | 4107 | 1 | 71.22  |
| 1401 | 3_WT.nd2 | 15 | 56 | 2867 | 1 | 55.87  |
| 1402 | 3_WT.nd2 | 15 | 57 | 2330 | 1 | 330.95 |
| 1403 | 3_WT.nd2 | 15 | 58 | 2300 | 1 | 298.3  |
| 1404 | 3_WT.nd2 | 15 | 59 | 2753 | 1 | 48.17  |
| 1405 | 3_WT.nd2 | 15 | 60 | 5554 | 2 | 82.07  |
| 1406 | 3_WT.nd2 | 15 | 61 | 2634 | 1 | 43.32  |
| 1407 | 3_WT.nd2 | 15 | 62 | 2345 | 1 | 293.52 |
| 1408 | 3_WT.nd2 | 15 | 63 | 3864 | 1 | 82.01  |
| 1409 | 3_WT.nd2 | 15 | 64 | 3056 | 1 | 347.13 |
| 1410 | 3_WT.nd2 | 15 | 65 | 3634 | 1 | 342.43 |
| 1411 | 3_WT.nd2 | 15 | 66 | 4391 | 2 | 339.44 |
| 1412 | 3_WT.nd2 | 15 | 67 | 3716 | 1 | 333.08 |
| 1413 | 3_WT.nd2 | 15 | 68 | 3265 | 1 | 333.86 |
| 1414 | 3_WT.nd2 | 15 | 69 | 3288 | 1 | 37     |
| 1415 | 3_WT.nd2 | 15 | 70 | 3712 | 1 | 362.86 |
| 1416 | 3_WT.nd2 | 15 | 71 | 4133 | 1 | 330.85 |
| 1417 | 3_WT.nd2 | 15 | 72 | 3746 | 1 | 32     |
| 1418 | 3_WT.nd2 | 15 | 73 | 3963 | 1 | 331.25 |

|      |          |    |     |      |   |        |
|------|----------|----|-----|------|---|--------|
| 1419 | 3_WT.nd2 | 15 | 74  | 4006 | 1 | 25.94  |
| 1420 | 3_WT.nd2 | 15 | 75  | 4139 | 1 | 330.48 |
| 1421 | 3_WT.nd2 | 15 | 76  | 3512 | 1 | 331.6  |
| 1422 | 3_WT.nd2 | 15 | 77  | 3063 | 1 | 48.76  |
| 1423 | 3_WT.nd2 | 15 | 78  | 3872 | 1 | 235.69 |
| 1424 | 3_WT.nd2 | 15 | 79  | 2820 | 1 | 256.63 |
| 1425 | 3_WT.nd2 | 15 | 80  | 4119 | 1 | 58.82  |
| 1426 | 3_WT.nd2 | 15 | 81  | 3912 | 1 | 10     |
| 1427 | 3_WT.nd2 | 15 | 82  | 3899 | 1 | 47.85  |
| 1428 | 3_WT.nd2 | 15 | 83  | 4264 | 2 | 37.58  |
| 1429 | 3_WT.nd2 | 15 | 84  | 3926 | 1 | 2.24   |
| 1430 | 3_WT.nd2 | 15 | 85  | 4353 | 2 | 28.79  |
| 1431 | 3_WT.nd2 | 15 | 86  | 2843 | 1 | 367.45 |
| 1432 | 3_WT.nd2 | 15 | 87  | 5250 | 2 | 23     |
| 1433 | 3_WT.nd2 | 15 | 88  | 2869 | 1 | 32.06  |
| 1434 | 3_WT.nd2 | 15 | 89  | 3181 | 1 | 0      |
| 1435 | 3_WT.nd2 | 15 | 90  | 5224 | 2 | 20.22  |
| 1436 | 3_WT.nd2 | 15 | 91  | 4507 | 2 | 29.07  |
| 1437 | 3_WT.nd2 | 15 | 92  | 2654 | 1 | 98.86  |
| 1438 | 3_WT.nd2 | 15 | 93  | 3888 | 1 | 35.38  |
| 1439 | 3_WT.nd2 | 15 | 94  | 3092 | 1 | 49.04  |
| 1440 | 3_WT.nd2 | 15 | 95  | 2710 | 1 | 55.04  |
| 1441 | 3_WT.nd2 | 15 | 96  | 2844 | 1 | 205.53 |
| 1442 | 3_WT.nd2 | 15 | 97  | 2465 | 1 | 293.32 |
| 1443 | 3_WT.nd2 | 15 | 98  | 2765 | 1 | 52.2   |
| 1444 | 3_WT.nd2 | 15 | 99  | 3954 | 1 | 34     |
| 1445 | 3_WT.nd2 | 15 | 100 | 4392 | 2 | 36.06  |
| 1446 | 3_WT.nd2 | 15 | 101 | 3198 | 1 | 51.62  |
| 1447 | 3_WT.nd2 | 15 | 102 | 2901 | 1 | 60.46  |
| 1448 | 3_WT.nd2 | 15 | 103 | 3115 | 1 | 22.8   |
| 1449 | 3_WT.nd2 | 15 | 104 | 2767 | 1 | 46.53  |
| 1450 | 3_WT.nd2 | 15 | 105 | 2939 | 1 | 11     |
| 1451 | 3_WT.nd2 | 15 | 106 | 2534 | 1 | 36.67  |
| 1452 | 3_WT.nd2 | 15 | 107 | 2864 | 1 | 94.05  |
| 1453 | 3_WT.nd2 | 15 | 108 | 3160 | 1 | 387    |
| 1454 | 3_WT.nd2 | 15 | 109 | 2647 | 1 | 39     |
| 1455 | 3_WT.nd2 | 15 | 110 | 2754 | 1 | 17.72  |
| 1456 | 3_WT.nd2 | 15 | 111 | 2409 | 1 | 346.12 |
| 1457 | 3_WT.nd2 | 15 | 112 | 4471 | 2 | 402.72 |
| 1458 | 3_WT.nd2 | 15 | 113 | 2698 | 1 | 449.07 |
| 1459 | 3_WT.nd2 | 15 | 114 | 3868 | 1 | 443.16 |
| 1460 | 3_WT.nd2 | 15 | 115 | 4088 | 1 | 420.3  |
| 1461 | 3_WT.nd2 | 15 | 116 | 5191 | 2 | 404.88 |

|      |          |    |     |      |   |        |
|------|----------|----|-----|------|---|--------|
| 1462 | 3_WT.nd2 | 15 | 117 | 2530 | 1 | 42.64  |
| 1463 | 3_WT.nd2 | 15 | 118 | 4439 | 2 | 433.85 |
| 1464 | 3_WT.nd2 | 15 | 119 | 3957 | 1 | 414.67 |
| 1465 | 3_WT.nd2 | 15 | 120 | 5613 | 2 | 437.35 |
| 1466 | 3_WT.nd2 | 15 | 121 | 4110 | 1 | 42.38  |
| 1467 | 3_WT.nd2 | 15 | 122 | 4376 | 2 | 428.58 |
| 1468 | 3_WT.nd2 | 15 | 123 | 4947 | 2 | 437.53 |
| 1469 | 3_WT.nd2 | 15 | 124 | 5480 | 2 | 172.73 |
| 1470 | 3_WT.nd2 | 15 | 125 | 4566 | 2 | 185.73 |
| 1471 | 3_WT.nd2 | 15 | 126 | 4673 | 2 | 461.97 |
| 1472 | 3_WT.nd2 | 15 | 127 | 3065 | 1 | 403.93 |
| 1473 | 3_WT.nd2 | 15 | 128 | 2552 | 1 | 124.53 |
| 1474 | 3_WT.nd2 | 15 | 129 | 3456 | 1 | 128.08 |
| 1475 | 3_WT.nd2 | 15 | 130 | 2726 | 1 | 169.29 |
| 1476 | 3_WT.nd2 | 15 | 131 | 4345 | 2 | 181.22 |
| 1477 | 3_WT.nd2 | 15 | 132 | 3631 | 1 | 165.92 |
| 1478 | 3_WT.nd2 | 15 | 133 | 6483 | 2 | 166.39 |
| 1479 | 3_WT.nd2 | 15 | 134 | 2748 | 1 | 322.82 |
| 1480 | 3_WT.nd2 | 15 | 135 | 2534 | 1 | 380.49 |
| 1481 | 3_WT.nd2 | 15 | 136 | 2420 | 1 | 226.5  |
| 1482 | 3_WT.nd2 | 15 | 137 | 2482 | 1 | 378.3  |
| 1483 | 3_WT.nd2 | 15 | 138 | 2757 | 1 | 239.34 |
| 1484 | 3_WT.nd2 | 16 | 1   | 3145 | 1 | 289.28 |
| 1485 | 3_WT.nd2 | 16 | 2   | 3016 | 1 | 59.21  |
| 1486 | 3_WT.nd2 | 16 | 3   | 2604 | 1 | 11.4   |
| 1487 | 3_WT.nd2 | 16 | 4   | 4141 | 1 | 12     |
| 1488 | 3_WT.nd2 | 16 | 5   | 3783 | 1 | 16     |
| 1489 | 3_WT.nd2 | 16 | 6   | 2497 | 1 | 20     |
| 1490 | 3_WT.nd2 | 16 | 7   | 5139 | 2 | 0      |
| 1491 | 3_WT.nd2 | 16 | 8   | 3765 | 1 | 21.38  |
| 1492 | 3_WT.nd2 | 16 | 9   | 2448 | 1 | 54     |
| 1493 | 3_WT.nd2 | 16 | 10  | 3646 | 1 | 0      |
| 1494 | 3_WT.nd2 | 16 | 11  | 3036 | 1 | 23.35  |
| 1495 | 3_WT.nd2 | 16 | 12  | 2586 | 1 | 32.31  |
| 1496 | 3_WT.nd2 | 16 | 13  | 2598 | 1 | 36.01  |
| 1497 | 3_WT.nd2 | 16 | 14  | 2782 | 1 | 49.65  |
| 1498 | 3_WT.nd2 | 16 | 15  | 2649 | 1 | 57.01  |
| 1499 | 3_WT.nd2 | 16 | 16  | 2562 | 1 | 76.03  |
| 1500 | 3_WT.nd2 | 16 | 17  | 2993 | 1 | 26.93  |
| 1501 | 3_WT.nd2 | 16 | 18  | 2715 | 1 | 22.09  |
| 1502 | 3_WT.nd2 | 16 | 19  | 2911 | 1 | 55.46  |
| 1503 | 3_WT.nd2 | 16 | 20  | 3085 | 1 | 14     |
| 1504 | 3_WT.nd2 | 16 | 21  | 3546 | 1 | 10     |

|      |          |    |    |       |    |        |
|------|----------|----|----|-------|----|--------|
| 1505 | 3_WT.nd2 | 16 | 22 | 2526  | 1  | 28.28  |
| 1506 | 3_WT.nd2 | 16 | 23 | 3760  | 1  | 6.08   |
| 1507 | 3_WT.nd2 | 16 | 24 | 51697 | 18 | 1.41   |
| 1508 | 3_WT.nd2 | 16 | 25 | 3947  | 1  | 3      |
| 1509 | 3_WT.nd2 | 16 | 26 | 3601  | 1  | 18.03  |
| 1510 | 3_WT.nd2 | 16 | 27 | 4697  | 2  | 8.06   |
| 1511 | 3_WT.nd2 | 16 | 28 | 3933  | 1  | 2.83   |
| 1512 | 3_WT.nd2 | 16 | 29 | 3331  | 1  | 38.63  |
| 1513 | 3_WT.nd2 | 16 | 30 | 3836  | 1  | 44.27  |
| 1514 | 3_WT.nd2 | 16 | 31 | 4740  | 2  | 0      |
| 1515 | 3_WT.nd2 | 16 | 32 | 2953  | 1  | 32     |
| 1516 | 3_WT.nd2 | 16 | 33 | 2804  | 1  | 46     |
| 1517 | 3_WT.nd2 | 16 | 34 | 3105  | 1  | 57     |
| 1518 | 3_WT.nd2 | 16 | 35 | 4998  | 2  | 0      |
| 1519 | 3_WT.nd2 | 16 | 36 | 6723  | 2  | 1      |
| 1520 | 3_WT.nd2 | 16 | 37 | 4515  | 2  | 15     |
| 1521 | 3_WT.nd2 | 16 | 38 | 3985  | 1  | 59.3   |
| 1522 | 3_WT.nd2 | 16 | 39 | 3139  | 1  | 0      |
| 1523 | 3_WT.nd2 | 16 | 40 | 2936  | 1  | 153.08 |
| 1524 | 3_WT.nd2 | 16 | 41 | 4719  | 2  | 60.21  |
| 1525 | 3_WT.nd2 | 16 | 42 | 3009  | 1  | 43.14  |
| 1526 | 3_WT.nd2 | 16 | 43 | 3711  | 1  | 83.87  |
| 1527 | 3_WT.nd2 | 16 | 44 | 7156  | 3  | 48.27  |
| 1528 | 3_WT.nd2 | 16 | 45 | 3355  | 1  | 79.88  |
| 1529 | 3_WT.nd2 | 16 | 46 | 3782  | 1  | 96.88  |
| 1530 | 3_WT.nd2 | 16 | 47 | 3893  | 1  | 96.9   |
| 1531 | 3_WT.nd2 | 16 | 48 | 5187  | 2  | 94.87  |
| 1532 | 3_WT.nd2 | 16 | 49 | 3569  | 1  | 0      |
| 1533 | 3_WT.nd2 | 16 | 50 | 3265  | 1  | 0      |
| 1534 | 3_WT.nd2 | 16 | 51 | 6658  | 2  | 0      |
| 1535 | 3_WT.nd2 | 16 | 52 | 3574  | 1  | 7      |
| 1536 | 3_WT.nd2 | 16 | 53 | 3352  | 1  | 27.51  |
| 1537 | 3_WT.nd2 | 16 | 54 | 3092  | 1  | 12.81  |
| 1538 | 3_WT.nd2 | 16 | 55 | 3868  | 1  | 20.4   |
| 1539 | 3_WT.nd2 | 16 | 56 | 44587 | 16 | 5      |
| 1540 | 3_WT.nd2 | 16 | 57 | 3628  | 1  | 26.93  |
| 1541 | 3_WT.nd2 | 16 | 58 | 3233  | 1  | 45.31  |
| 1542 | 3_WT.nd2 | 16 | 59 | 3795  | 1  | 15.52  |
| 1543 | 3_WT.nd2 | 16 | 60 | 3710  | 1  | 31.76  |
| 1544 | 3_WT.nd2 | 16 | 61 | 3776  | 1  | 17.8   |
| 1545 | 3_WT.nd2 | 16 | 62 | 3256  | 1  | 6      |
| 1546 | 3_WT.nd2 | 16 | 63 | 3710  | 1  | 8.49   |
| 1547 | 3_WT.nd2 | 16 | 64 | 3181  | 1  | 4.12   |

|      |          |    |     |       |    |        |
|------|----------|----|-----|-------|----|--------|
| 1548 | 3_WT.nd2 | 16 | 65  | 3820  | 1  | 0      |
| 1549 | 3_WT.nd2 | 16 | 66  | 42488 | 15 | 0      |
| 1550 | 3_WT.nd2 | 16 | 67  | 3919  | 1  | 51.74  |
| 1551 | 3_WT.nd2 | 16 | 68  | 2760  | 1  | 26.87  |
| 1552 | 3_WT.nd2 | 16 | 69  | 3657  | 1  | 31.89  |
| 1553 | 3_WT.nd2 | 16 | 70  | 3753  | 1  | 26.91  |
| 1554 | 3_WT.nd2 | 16 | 71  | 2723  | 1  | 54     |
| 1555 | 3_WT.nd2 | 16 | 72  | 3863  | 1  | 32.28  |
| 1556 | 3_WT.nd2 | 16 | 73  | 4613  | 2  | 17.89  |
| 1557 | 3_WT.nd2 | 16 | 74  | 3644  | 1  | 18.25  |
| 1558 | 3_WT.nd2 | 16 | 75  | 3176  | 1  | 4      |
| 1559 | 3_WT.nd2 | 16 | 76  | 4239  | 2  | 5      |
| 1560 | 3_WT.nd2 | 16 | 77  | 3447  | 1  | 9      |
| 1561 | 3_WT.nd2 | 16 | 78  | 3831  | 1  | 63.25  |
| 1562 | 3_WT.nd2 | 16 | 79  | 3202  | 1  | 38.01  |
| 1563 | 3_WT.nd2 | 16 | 80  | 3072  | 1  | 14     |
| 1564 | 3_WT.nd2 | 16 | 81  | 3252  | 1  | 11.4   |
| 1565 | 3_WT.nd2 | 16 | 82  | 7620  | 3  | 3      |
| 1566 | 3_WT.nd2 | 16 | 83  | 7924  | 3  | 0      |
| 1567 | 3_WT.nd2 | 16 | 84  | 7179  | 3  | 9.06   |
| 1568 | 3_WT.nd2 | 16 | 85  | 6899  | 2  | 0      |
| 1569 | 3_WT.nd2 | 16 | 86  | 6459  | 2  | 1      |
| 1570 | 3_WT.nd2 | 16 | 87  | 7734  | 3  | 6      |
| 1571 | 3_WT.nd2 | 16 | 88  | 3539  | 1  | 15.52  |
| 1572 | 3_WT.nd2 | 16 | 89  | 41741 | 15 | 14.56  |
| 1573 | 3_WT.nd2 | 16 | 90  | 4426  | 2  | 22.63  |
| 1574 | 3_WT.nd2 | 16 | 91  | 3297  | 1  | 28.16  |
| 1575 | 3_WT.nd2 | 16 | 92  | 3044  | 1  | 4      |
| 1576 | 3_WT.nd2 | 16 | 93  | 3461  | 1  | 38.48  |
| 1577 | 3_WT.nd2 | 16 | 94  | 5603  | 2  | 29.55  |
| 1578 | 3_WT.nd2 | 16 | 95  | 3318  | 1  | 40     |
| 1579 | 3_WT.nd2 | 16 | 96  | 4279  | 2  | 38.08  |
| 1580 | 3_WT.nd2 | 16 | 97  | 3465  | 1  | 42.01  |
| 1581 | 3_WT.nd2 | 16 | 98  | 2818  | 1  | 18.68  |
| 1582 | 3_WT.nd2 | 16 | 99  | 4977  | 2  | 46.4   |
| 1583 | 3_WT.nd2 | 16 | 100 | 2707  | 1  | 310.93 |
| 1584 | 3_WT.nd2 | 16 | 101 | 3397  | 1  | 12.73  |
| 1585 | 3_WT.nd2 | 16 | 102 | 2907  | 1  | 56.04  |
| 1586 | 3_WT.nd2 | 16 | 103 | 4316  | 2  | 63.25  |
| 1587 | 3_WT.nd2 | 16 | 104 | 3002  | 1  | 330.63 |
| 1588 | 3_WT.nd2 | 16 | 105 | 2612  | 1  | 322.06 |
| 1589 | 3_WT.nd2 | 16 | 106 | 3385  | 1  | 67.8   |
| 1590 | 3_WT.nd2 | 16 | 107 | 3489  | 1  | 20.1   |

|      |          |    |     |       |    |        |
|------|----------|----|-----|-------|----|--------|
| 1591 | 3_WT.nd2 | 16 | 108 | 4196  | 1  | 72.25  |
| 1592 | 3_WT.nd2 | 16 | 109 | 3268  | 1  | 22     |
| 1593 | 3_WT.nd2 | 16 | 110 | 2731  | 1  | 344.05 |
| 1594 | 3_WT.nd2 | 16 | 111 | 2712  | 1  | 54.45  |
| 1595 | 3_WT.nd2 | 16 | 112 | 2629  | 1  | 330.95 |
| 1596 | 3_WT.nd2 | 16 | 113 | 3005  | 1  | 310.54 |
| 1597 | 3_WT.nd2 | 16 | 114 | 2307  | 1  | 298.3  |
| 1598 | 3_WT.nd2 | 16 | 115 | 5792  | 2  | 82.13  |
| 1599 | 3_WT.nd2 | 16 | 116 | 2675  | 1  | 43.32  |
| 1600 | 3_WT.nd2 | 16 | 117 | 2426  | 1  | 294.05 |
| 1601 | 3_WT.nd2 | 16 | 118 | 2403  | 1  | 308.04 |
| 1602 | 3_WT.nd2 | 16 | 119 | 3312  | 1  | 82.62  |
| 1603 | 3_WT.nd2 | 16 | 120 | 2727  | 1  | 112.04 |
| 1604 | 3_WT.nd2 | 16 | 121 | 2953  | 1  | 458.85 |
| 1605 | 3_WT.nd2 | 17 | 1   | 2960  | 1  | 90.09  |
| 1606 | 3_WT.nd2 | 17 | 2   | 3310  | 1  | 9.49   |
| 1607 | 3_WT.nd2 | 17 | 3   | 3060  | 1  | 6      |
| 1608 | 3_WT.nd2 | 17 | 4   | 2435  | 1  | 16.16  |
| 1609 | 3_WT.nd2 | 17 | 5   | 3630  | 1  | 2      |
| 1610 | 3_WT.nd2 | 17 | 6   | 4286  | 2  | 1.41   |
| 1611 | 3_WT.nd2 | 17 | 7   | 4286  | 2  | 9      |
| 1612 | 3_WT.nd2 | 17 | 8   | 4165  | 1  | 19     |
| 1613 | 3_WT.nd2 | 17 | 9   | 3484  | 1  | 31     |
| 1614 | 3_WT.nd2 | 17 | 10  | 2926  | 1  | 47.01  |
| 1615 | 3_WT.nd2 | 17 | 11  | 4314  | 2  | 20.62  |
| 1616 | 3_WT.nd2 | 17 | 12  | 3042  | 1  | 2      |
| 1617 | 3_WT.nd2 | 17 | 13  | 3619  | 1  | 0      |
| 1618 | 3_WT.nd2 | 17 | 14  | 2928  | 1  | 0      |
| 1619 | 3_WT.nd2 | 17 | 15  | 3964  | 1  | 0      |
| 1620 | 3_WT.nd2 | 17 | 16  | 50369 | 18 | 10     |
| 1621 | 3_WT.nd2 | 17 | 17  | 3992  | 1  | 5      |
| 1622 | 3_WT.nd2 | 17 | 18  | 4609  | 2  | 17.8   |
| 1623 | 3_WT.nd2 | 17 | 19  | 2841  | 1  | 9.22   |
| 1624 | 3_WT.nd2 | 17 | 20  | 4176  | 1  | 0      |
| 1625 | 3_WT.nd2 | 17 | 21  | 3779  | 1  | 10     |
| 1626 | 3_WT.nd2 | 17 | 22  | 4292  | 2  | 26.08  |
| 1627 | 3_WT.nd2 | 17 | 23  | 3389  | 1  | 33.02  |
| 1628 | 3_WT.nd2 | 17 | 24  | 2964  | 1  | 43.42  |
| 1629 | 3_WT.nd2 | 17 | 25  | 2719  | 1  | 51.87  |
| 1630 | 3_WT.nd2 | 17 | 26  | 2996  | 1  | 33.3   |
| 1631 | 3_WT.nd2 | 17 | 27  | 2434  | 1  | 37     |
| 1632 | 3_WT.nd2 | 17 | 28  | 2863  | 1  | 72.35  |
| 1633 | 3_WT.nd2 | 17 | 29  | 2755  | 1  | 93.91  |

|      |          |    |    |       |    |        |
|------|----------|----|----|-------|----|--------|
| 1634 | 3_WT.nd2 | 17 | 30 | 4874  | 2  | 159.14 |
| 1635 | 3_WT.nd2 | 17 | 31 | 2785  | 1  | 46.65  |
| 1636 | 3_WT.nd2 | 17 | 32 | 2491  | 1  | 184.44 |
| 1637 | 3_WT.nd2 | 17 | 33 | 2713  | 1  | 12.04  |
| 1638 | 3_WT.nd2 | 17 | 34 | 2801  | 1  | 104    |
| 1639 | 3_WT.nd2 | 17 | 35 | 3536  | 1  | 1      |
| 1640 | 3_WT.nd2 | 17 | 36 | 2600  | 1  | 84.17  |
| 1641 | 3_WT.nd2 | 17 | 37 | 2890  | 1  | 0      |
| 1642 | 3_WT.nd2 | 17 | 38 | 2371  | 1  | 153    |
| 1643 | 3_WT.nd2 | 17 | 39 | 5449  | 2  | 11.18  |
| 1644 | 3_WT.nd2 | 17 | 40 | 3234  | 1  | 23.43  |
| 1645 | 3_WT.nd2 | 17 | 41 | 2839  | 1  | 67.74  |
| 1646 | 3_WT.nd2 | 17 | 42 | 4355  | 2  | 33.11  |
| 1647 | 3_WT.nd2 | 17 | 43 | 2828  | 1  | 54.82  |
| 1648 | 3_WT.nd2 | 17 | 44 | 3456  | 1  | 45.31  |
| 1649 | 3_WT.nd2 | 17 | 45 | 4133  | 1  | 36.14  |
| 1650 | 3_WT.nd2 | 17 | 46 | 2540  | 1  | 79.65  |
| 1651 | 3_WT.nd2 | 17 | 47 | 3846  | 1  | 37.54  |
| 1652 | 3_WT.nd2 | 17 | 48 | 50379 | 18 | 43.86  |
| 1653 | 3_WT.nd2 | 17 | 49 | 3392  | 1  | 57.38  |
| 1654 | 3_WT.nd2 | 17 | 50 | 2809  | 1  | 62.39  |
| 1655 | 3_WT.nd2 | 17 | 51 | 3764  | 1  | 23.09  |
| 1656 | 3_WT.nd2 | 17 | 52 | 2967  | 1  | 62.1   |
| 1657 | 3_WT.nd2 | 17 | 53 | 2785  | 1  | 9.06   |
| 1658 | 3_WT.nd2 | 17 | 54 | 2938  | 1  | 0      |
| 1659 | 3_WT.nd2 | 17 | 55 | 3032  | 1  | 169.29 |
| 1660 | 3_WT.nd2 | 18 | 1  | 2677  | 1  | 356.22 |
| 1661 | 3_WT.nd2 | 18 | 2  | 3108  | 1  | 329.69 |
| 1662 | 3_WT.nd2 | 18 | 3  | 3051  | 1  | 341.62 |
| 1663 | 3_WT.nd2 | 18 | 4  | 3543  | 1  | 312.82 |
| 1664 | 3_WT.nd2 | 18 | 5  | 3195  | 1  | 327.42 |
| 1665 | 3_WT.nd2 | 18 | 6  | 3196  | 1  | 334.82 |
| 1666 | 3_WT.nd2 | 18 | 7  | 2558  | 1  | 400.98 |
| 1667 | 3_WT.nd2 | 18 | 8  | 2288  | 1  | 316.21 |
| 1668 | 3_WT.nd2 | 18 | 9  | 2541  | 1  | 42.45  |
| 1669 | 3_WT.nd2 | 18 | 10 | 2778  | 1  | 48.8   |
| 1670 | 3_WT.nd2 | 18 | 11 | 2968  | 1  | 81.15  |
| 1671 | 3_WT.nd2 | 18 | 12 | 3122  | 1  | 0      |
| 1672 | 3_WT.nd2 | 18 | 13 | 5475  | 2  | 116.71 |
| 1673 | 3_WT.nd2 | 18 | 14 | 2521  | 1  | 44.6   |
| 1674 | 3_WT.nd2 | 18 | 15 | 2573  | 1  | 142.87 |
| 1675 | 3_WT.nd2 | 18 | 16 | 3118  | 1  | 75.01  |
| 1676 | 3_WT.nd2 | 18 | 17 | 2855  | 1  | 65.95  |

|      |          |    |    |       |    |        |
|------|----------|----|----|-------|----|--------|
| 1677 | 3_WT.nd2 | 18 | 18 | 2380  | 1  | 77.08  |
| 1678 | 3_WT.nd2 | 18 | 19 | 4203  | 1  | 79.25  |
| 1679 | 3_WT.nd2 | 18 | 20 | 2749  | 1  | 93.34  |
| 1680 | 3_WT.nd2 | 18 | 21 | 2735  | 1  | 122.98 |
| 1681 | 3_WT.nd2 | 18 | 22 | 3408  | 1  | 77.08  |
| 1682 | 3_WT.nd2 | 18 | 23 | 2942  | 1  | 231.4  |
| 1683 | 3_WT.nd2 | 18 | 24 | 3999  | 1  | 74.25  |
| 1684 | 3_WT.nd2 | 18 | 25 | 2805  | 1  | 43.29  |
| 1685 | 3_WT.nd2 | 18 | 26 | 2749  | 1  | 58.05  |
| 1686 | 3_WT.nd2 | 18 | 27 | 3669  | 1  | 38.29  |
| 1687 | 3_WT.nd2 | 18 | 28 | 3222  | 1  | 72.95  |
| 1688 | 3_WT.nd2 | 18 | 29 | 3214  | 1  | 26.87  |
| 1689 | 3_WT.nd2 | 18 | 30 | 2807  | 1  | 12.73  |
| 1690 | 3_WT.nd2 | 18 | 31 | 2910  | 1  | 7      |
| 1691 | 3_WT.nd2 | 18 | 32 | 3252  | 1  | 7.62   |
| 1692 | 3_WT.nd2 | 18 | 33 | 3048  | 1  | 13.45  |
| 1693 | 3_WT.nd2 | 18 | 34 | 3270  | 1  | 0      |
| 1694 | 3_WT.nd2 | 18 | 35 | 2991  | 1  | 45.18  |
| 1695 | 3_WT.nd2 | 18 | 36 | 34189 | 12 | 88.89  |
| 1696 | 3_WT.nd2 | 18 | 37 | 2958  | 1  | 20.52  |
| 1697 | 3_WT.nd2 | 18 | 38 | 3636  | 1  | 64.03  |
| 1698 | 3_WT.nd2 | 18 | 39 | 3004  | 1  | 60.41  |
| 1699 | 3_WT.nd2 | 18 | 40 | 3746  | 1  | 35.47  |
| 1700 | 3_WT.nd2 | 18 | 41 | 4555  | 2  | 46.07  |
| 1701 | 3_WT.nd2 | 18 | 42 | 4544  | 2  | 55.15  |
| 1702 | 3_WT.nd2 | 18 | 43 | 3701  | 1  | 83.2   |
| 1703 | 3_WT.nd2 | 18 | 44 | 65754 | 23 | 43.91  |
| 1704 | 3_WT.nd2 | 18 | 45 | 2884  | 1  | 20.22  |
| 1705 | 3_WT.nd2 | 18 | 46 | 4706  | 2  | 42.64  |
| 1706 | 3_WT.nd2 | 18 | 47 | 4723  | 2  | 77.78  |
| 1707 | 3_WT.nd2 | 18 | 48 | 4510  | 2  | 73.33  |
| 1708 | 3_WT.nd2 | 18 | 49 | 3002  | 1  | 10     |
| 1709 | 3_WT.nd2 | 18 | 50 | 68981 | 24 | 67     |
| 1710 | 3_WT.nd2 | 18 | 51 | 3733  | 1  | 0      |
| 1711 | 3_WT.nd2 | 18 | 52 | 5788  | 2  | 95     |
| 1712 | 3_WT.nd2 | 18 | 53 | 3386  | 1  | 73.41  |
| 1713 | 3_WT.nd2 | 18 | 54 | 5553  | 2  | 0      |
| 1714 | 3_WT.nd2 | 18 | 55 | 6789  | 2  | 66.01  |
| 1715 | 3_WT.nd2 | 18 | 56 | 7279  | 3  | 9.85   |
| 1716 | 3_WT.nd2 | 18 | 57 | 5586  | 2  | 67.36  |
| 1717 | 3_WT.nd2 | 18 | 58 | 4880  | 2  | 61.4   |
| 1718 | 3_WT.nd2 | 18 | 59 | 4551  | 2  | 107.07 |
| 1719 | 3_WT.nd2 | 18 | 60 | 5628  | 2  | 14.87  |



|      |          |    |     |       |    |        |
|------|----------|----|-----|-------|----|--------|
| 1720 | 3_WT.nd2 | 18 | 61  | 3281  | 1  | 118.07 |
| 1721 | 3_WT.nd2 | 18 | 62  | 65238 | 23 | 21.93  |
| 1722 | 3_WT.nd2 | 18 | 63  | 2679  | 1  | 12     |
| 1723 | 3_WT.nd2 | 18 | 64  | 63384 | 22 | 59.2   |
| 1724 | 3_WT.nd2 | 18 | 65  | 3362  | 1  | 29.07  |
| 1725 | 3_WT.nd2 | 18 | 66  | 3849  | 1  | 126.48 |
| 1726 | 3_WT.nd2 | 18 | 67  | 3507  | 1  | 46.1   |
| 1727 | 3_WT.nd2 | 18 | 68  | 3086  | 1  | 43.83  |
| 1728 | 3_WT.nd2 | 18 | 69  | 2535  | 1  | 38.29  |
| 1729 | 3_WT.nd2 | 18 | 70  | 3421  | 1  | 59.03  |
| 1730 | 3_WT.nd2 | 18 | 71  | 2793  | 1  | 13.34  |
| 1731 | 3_WT.nd2 | 18 | 72  | 4683  | 2  | 48.08  |
| 1732 | 3_WT.nd2 | 18 | 73  | 4720  | 2  | 24.21  |
| 1733 | 3_WT.nd2 | 18 | 74  | 3302  | 1  | 42.95  |
| 1734 | 3_WT.nd2 | 18 | 75  | 2777  | 1  | 319.45 |
| 1735 | 3_WT.nd2 | 18 | 76  | 3240  | 1  | 268.06 |
| 1736 | 3_WT.nd2 | 18 | 77  | 2797  | 1  | 321.29 |
| 1737 | 3_WT.nd2 | 18 | 78  | 3341  | 1  | 249.71 |
| 1738 | 3_WT.nd2 | 18 | 79  | 50581 | 18 | 238.25 |
| 1739 | 3_WT.nd2 | 18 | 80  | 2695  | 1  | 8.49   |
| 1740 | 3_WT.nd2 | 18 | 81  | 4173  | 1  | 234.96 |
| 1741 | 3_WT.nd2 | 18 | 82  | 3014  | 1  | 234.02 |
| 1742 | 3_WT.nd2 | 18 | 83  | 2655  | 1  | 63.35  |
| 1743 | 3_WT.nd2 | 18 | 84  | 2608  | 1  | 62     |
| 1744 | 3_WT.nd2 | 18 | 85  | 2641  | 1  | 91.39  |
| 1745 | 3_WT.nd2 | 18 | 86  | 3151  | 1  | 216.28 |
| 1746 | 3_WT.nd2 | 18 | 87  | 2804  | 1  | 1      |
| 1747 | 3_WT.nd2 | 18 | 88  | 2784  | 1  | 7      |
| 1748 | 3_WT.nd2 | 18 | 89  | 3844  | 1  | 228.18 |
| 1749 | 3_WT.nd2 | 18 | 90  | 2448  | 1  | 80.23  |
| 1750 | 3_WT.nd2 | 18 | 91  | 2629  | 1  | 34.13  |
| 1751 | 3_WT.nd2 | 18 | 92  | 2560  | 1  | 75.43  |
| 1752 | 3_WT.nd2 | 18 | 93  | 2391  | 1  | 91.71  |
| 1753 | 3_WT.nd2 | 18 | 94  | 2532  | 1  | 49.03  |
| 1754 | 3_WT.nd2 | 18 | 95  | 3024  | 1  | 118.07 |
| 1755 | 3_WT.nd2 | 18 | 96  | 3357  | 1  | 206.18 |
| 1756 | 3_WT.nd2 | 18 | 97  | 3812  | 1  | 77.16  |
| 1757 | 3_WT.nd2 | 18 | 98  | 3036  | 1  | 175.79 |
| 1758 | 3_WT.nd2 | 18 | 99  | 2720  | 1  | 97.31  |
| 1759 | 3_WT.nd2 | 18 | 100 | 3041  | 1  | 118.33 |
| 1760 | 3_WT.nd2 | 18 | 101 | 2989  | 1  | 109.18 |
| 1761 | 3_WT.nd2 | 18 | 102 | 2535  | 1  | 248.6  |
| 1762 | 3_WT.nd2 | 18 | 103 | 3230  | 1  | 84.85  |

|      |          |    |     |       |    |        |
|------|----------|----|-----|-------|----|--------|
| 1763 | 3_WT.nd2 | 18 | 104 | 2835  | 1  | 288.13 |
| 1764 | 3_WT.nd2 | 18 | 105 | 2400  | 1  | 117.8  |
| 1765 | 3_WT.nd2 | 18 | 106 | 3341  | 1  | 124.81 |
| 1766 | 3_WT.nd2 | 18 | 107 | 2531  | 1  | 269.08 |
| 1767 | 3_WT.nd2 | 18 | 108 | 3622  | 1  | 144.31 |
| 1768 | 3_WT.nd2 | 18 | 109 | 2602  | 1  | 159.1  |
| 1769 | 3_WT.nd2 | 18 | 110 | 2573  | 1  | 157.21 |
| 1770 | 3_WT.nd2 | 18 | 111 | 2849  | 1  | 229.37 |
| 1771 | 3_WT.nd2 | 18 | 112 | 3577  | 1  | 199.65 |
| 1772 | 3_WT.nd2 | 18 | 113 | 2668  | 1  | 446.89 |
| 1773 | 3_WT.nd2 | 18 | 114 | 2553  | 1  | 183.17 |
| 1774 | 3_WT.nd2 | 18 | 115 | 4523  | 2  | 182.49 |
| 1775 | 3_WT.nd2 | 18 | 116 | 3012  | 1  | 183.24 |
| 1776 | 3_WT.nd2 | 18 | 117 | 4431  | 2  | 207.02 |
| 1777 | 3_WT.nd2 | 18 | 118 | 2340  | 1  | 268.4  |
| 1778 | 3_WT.nd2 | 18 | 119 | 4219  | 1  | 212.85 |
| 1779 | 3_WT.nd2 | 18 | 120 | 2719  | 1  | 226.68 |
| 1780 | 3_WT.nd2 | 18 | 121 | 2959  | 1  | 253.84 |
| 1781 | 3_WT.nd2 | 18 | 122 | 2809  | 1  | 250.16 |
| 1782 | 3_WT.nd2 | 19 | 1   | 3459  | 1  | 497.74 |
| 1783 | 3_WT.nd2 | 19 | 2   | 2575  | 1  | 371.1  |
| 1784 | 3_WT.nd2 | 19 | 3   | 2792  | 1  | 334.18 |
| 1785 | 3_WT.nd2 | 19 | 4   | 2679  | 1  | 345.94 |
| 1786 | 3_WT.nd2 | 19 | 5   | 3297  | 1  | 33.06  |
| 1787 | 3_WT.nd2 | 19 | 6   | 3759  | 1  | 34.71  |
| 1788 | 3_WT.nd2 | 19 | 7   | 4397  | 2  | 34     |
| 1789 | 3_WT.nd2 | 19 | 8   | 3328  | 1  | 39.36  |
| 1790 | 3_WT.nd2 | 19 | 9   | 3688  | 1  | 36     |
| 1791 | 3_WT.nd2 | 19 | 10  | 3709  | 1  | 43.27  |
| 1792 | 3_WT.nd2 | 19 | 11  | 3716  | 1  | 51.22  |
| 1793 | 3_WT.nd2 | 19 | 12  | 2840  | 1  | 58.9   |
| 1794 | 3_WT.nd2 | 19 | 13  | 4185  | 1  | 63.03  |
| 1795 | 3_WT.nd2 | 19 | 14  | 3354  | 1  | 69.31  |
| 1796 | 3_WT.nd2 | 19 | 15  | 2659  | 1  | 81.6   |
| 1797 | 3_WT.nd2 | 19 | 16  | 3331  | 1  | 261.77 |
| 1798 | 3_WT.nd2 | 19 | 17  | 4096  | 1  | 234.96 |
| 1799 | 3_WT.nd2 | 19 | 18  | 61322 | 22 | 227.18 |
| 1800 | 3_WT.nd2 | 19 | 19  | 4570  | 2  | 219.11 |
| 1801 | 3_WT.nd2 | 19 | 20  | 3738  | 1  | 218.59 |
| 1802 | 3_WT.nd2 | 19 | 21  | 3087  | 1  | 213.6  |
| 1803 | 3_WT.nd2 | 19 | 22  | 2508  | 1  | 174.4  |
| 1804 | 3_WT.nd2 | 19 | 23  | 3185  | 1  | 209.25 |
| 1805 | 3_WT.nd2 | 19 | 24  | 3789  | 1  | 203.92 |

|      |          |    |    |       |    |        |
|------|----------|----|----|-------|----|--------|
| 1806 | 3_WT.nd2 | 19 | 25 | 4101  | 1  | 194.1  |
| 1807 | 3_WT.nd2 | 19 | 26 | 3103  | 1  | 70     |
| 1808 | 3_WT.nd2 | 19 | 27 | 53504 | 19 | 177.69 |
| 1809 | 3_WT.nd2 | 19 | 28 | 3328  | 1  | 163.72 |
| 1810 | 3_WT.nd2 | 19 | 29 | 2820  | 1  | 84.22  |
| 1811 | 3_WT.nd2 | 19 | 30 | 3027  | 1  | 129.84 |
| 1812 | 3_WT.nd2 | 19 | 31 | 2521  | 1  | 48.02  |
| 1813 | 3_WT.nd2 | 19 | 32 | 2582  | 1  | 20.4   |
| 1814 | 3_WT.nd2 | 19 | 33 | 6170  | 2  | 8.06   |
| 1815 | 3_WT.nd2 | 19 | 34 | 4266  | 2  | 5      |
| 1816 | 3_WT.nd2 | 19 | 35 | 3287  | 1  | 66.19  |
| 1817 | 3_WT.nd2 | 19 | 36 | 5922  | 2  | 3.61   |
| 1818 | 3_WT.nd2 | 19 | 37 | 3636  | 1  | 13.04  |
| 1819 | 3_WT.nd2 | 19 | 38 | 3653  | 1  | 73.25  |
| 1820 | 3_WT.nd2 | 19 | 39 | 4564  | 2  | 2      |
| 1821 | 3_WT.nd2 | 19 | 40 | 4822  | 2  | 15.03  |
| 1822 | 3_WT.nd2 | 19 | 41 | 4540  | 2  | 0      |
| 1823 | 3_WT.nd2 | 19 | 42 | 4992  | 2  | 25.08  |
| 1824 | 3_WT.nd2 | 19 | 43 | 3630  | 1  | 7      |
| 1825 | 3_WT.nd2 | 19 | 44 | 7406  | 3  | 31     |
| 1826 | 3_WT.nd2 | 19 | 45 | 3475  | 1  | 71     |
| 1827 | 3_WT.nd2 | 19 | 46 | 3952  | 1  | 31.05  |
| 1828 | 3_WT.nd2 | 19 | 47 | 5099  | 2  | 51     |
| 1829 | 3_WT.nd2 | 19 | 48 | 2691  | 1  | 78.1   |
| 1830 | 3_WT.nd2 | 19 | 49 | 3279  | 1  | 31.91  |
| 1831 | 3_WT.nd2 | 19 | 50 | 4165  | 1  | 21.95  |
| 1832 | 3_WT.nd2 | 19 | 51 | 3274  | 1  | 3      |
| 1833 | 3_WT.nd2 | 19 | 52 | 2888  | 1  | 117.96 |
| 1834 | 3_WT.nd2 | 19 | 53 | 3514  | 1  | 9.22   |
| 1835 | 3_WT.nd2 | 19 | 54 | 11630 | 4  | 86.02  |
| 1836 | 3_WT.nd2 | 19 | 55 | 4427  | 2  | 0      |
| 1837 | 3_WT.nd2 | 19 | 56 | 2991  | 1  | 0      |
| 1838 | 3_WT.nd2 | 19 | 57 | 3560  | 1  | 0      |
| 1839 | 3_WT.nd2 | 19 | 58 | 3346  | 1  | 0      |
| 1840 | 3_WT.nd2 | 19 | 59 | 2689  | 1  | 22     |
| 1841 | 3_WT.nd2 | 19 | 60 | 4426  | 2  | 61.52  |
| 1842 | 3_WT.nd2 | 19 | 61 | 2839  | 1  | 5.39   |
| 1843 | 3_WT.nd2 | 19 | 62 | 4740  | 2  | 101.97 |
| 1844 | 3_WT.nd2 | 19 | 63 | 4319  | 2  | 6      |
| 1845 | 3_WT.nd2 | 19 | 64 | 3347  | 1  | 131.69 |
| 1846 | 3_WT.nd2 | 19 | 65 | 2901  | 1  | 12.81  |
| 1847 | 3_WT.nd2 | 19 | 66 | 5546  | 2  | 13.45  |
| 1848 | 3_WT.nd2 | 19 | 67 | 3953  | 1  | 16.4   |

|      |          |    |     |      |   |        |
|------|----------|----|-----|------|---|--------|
| 1849 | 3_WT.nd2 | 19 | 68  | 3037 | 1 | 123.15 |
| 1850 | 3_WT.nd2 | 19 | 69  | 3076 | 1 | 123.33 |
| 1851 | 3_WT.nd2 | 19 | 70  | 2850 | 1 | 127.49 |
| 1852 | 3_WT.nd2 | 19 | 71  | 5376 | 2 | 23.32  |
| 1853 | 3_WT.nd2 | 19 | 72  | 4129 | 1 | 127.95 |
| 1854 | 3_WT.nd2 | 19 | 73  | 3478 | 1 | 108.45 |
| 1855 | 3_WT.nd2 | 19 | 74  | 3598 | 1 | 122.04 |
| 1856 | 3_WT.nd2 | 19 | 75  | 2692 | 1 | 113.11 |
| 1857 | 3_WT.nd2 | 19 | 76  | 2576 | 1 | 120.65 |
| 1858 | 3_WT.nd2 | 19 | 77  | 2385 | 1 | 116.4  |
| 1859 | 3_WT.nd2 | 19 | 78  | 2545 | 1 | 125.5  |
| 1860 | 3_WT.nd2 | 19 | 79  | 3905 | 1 | 106    |
| 1861 | 3_WT.nd2 | 19 | 80  | 3350 | 1 | 96.67  |
| 1862 | 3_WT.nd2 | 19 | 81  | 2843 | 1 | 40.61  |
| 1863 | 3_WT.nd2 | 19 | 82  | 3563 | 1 | 101.26 |
| 1864 | 3_WT.nd2 | 19 | 83  | 2696 | 1 | 95.51  |
| 1865 | 3_WT.nd2 | 19 | 84  | 3770 | 1 | 88.01  |
| 1866 | 3_WT.nd2 | 19 | 85  | 2869 | 1 | 100.44 |
| 1867 | 3_WT.nd2 | 19 | 86  | 2841 | 1 | 47.54  |
| 1868 | 3_WT.nd2 | 19 | 87  | 2662 | 1 | 40     |
| 1869 | 3_WT.nd2 | 19 | 88  | 2659 | 1 | 37.48  |
| 1870 | 3_WT.nd2 | 19 | 89  | 2672 | 1 | 15.81  |
| 1871 | 3_WT.nd2 | 19 | 90  | 3261 | 1 | 38.83  |
| 1872 | 3_WT.nd2 | 19 | 91  | 3189 | 1 | 30.08  |
| 1873 | 3_WT.nd2 | 19 | 92  | 3309 | 1 | 12     |
| 1874 | 3_WT.nd2 | 19 | 93  | 2728 | 1 | 45.18  |
| 1875 | 3_WT.nd2 | 19 | 94  | 2865 | 1 | 120.37 |
| 1876 | 3_WT.nd2 | 19 | 95  | 2709 | 1 | 2      |
| 1877 | 3_WT.nd2 | 19 | 96  | 3098 | 1 | 5      |
| 1878 | 3_WT.nd2 | 19 | 97  | 2476 | 1 | 129.42 |
| 1879 | 3_WT.nd2 | 19 | 98  | 3299 | 1 | 1.41   |
| 1880 | 3_WT.nd2 | 19 | 99  | 3605 | 1 | 98.18  |
| 1881 | 3_WT.nd2 | 19 | 100 | 2349 | 1 | 17.03  |
| 1882 | 3_WT.nd2 | 19 | 101 | 2514 | 1 | 16     |
| 1883 | 3_WT.nd2 | 19 | 102 | 2379 | 1 | 58.01  |
| 1884 | 3_WT.nd2 | 19 | 103 | 2917 | 1 | 201.34 |
| 1885 | 3_WT.nd2 | 19 | 104 | 2588 | 1 | 15     |
| 1886 | 3_WT.nd2 | 19 | 105 | 5073 | 2 | 0      |
| 1887 | 3_WT.nd2 | 19 | 106 | 3530 | 1 | 213.85 |
| 1888 | 3_WT.nd2 | 19 | 107 | 3895 | 1 | 218.84 |
| 1889 | 3_WT.nd2 | 19 | 108 | 3558 | 1 | 0      |
| 1890 | 3_WT.nd2 | 19 | 109 | 2636 | 1 | 0      |
| 1891 | 3_WT.nd2 | 19 | 110 | 3100 | 1 | 222    |

|      |          |    |     |      |   |        |
|------|----------|----|-----|------|---|--------|
| 1892 | 3_WT.nd2 | 19 | 111 | 2887 | 1 | 55.22  |
| 1893 | 3_WT.nd2 | 19 | 112 | 2359 | 1 | 229.22 |
| 1894 | 3_WT.nd2 | 19 | 113 | 2268 | 1 | 236.14 |
| 1895 | 3_WT.nd2 | 19 | 114 | 2539 | 1 | 237.01 |
| 1    | 1_WT.nd2 | 1  | 1   | 2285 | 1 | 293.95 |
| 2    | 1_WT.nd2 | 1  | 2   | 2323 | 1 | 286.78 |
| 3    | 1_WT.nd2 | 1  | 3   | 4921 | 2 | 407.67 |
| 4    | 1_WT.nd2 | 1  | 4   | 5425 | 2 | 252.83 |
| 5    | 1_WT.nd2 | 1  | 5   | 3143 | 1 | 242.08 |
| 6    | 1_WT.nd2 | 1  | 6   | 2707 | 1 | 58     |
| 7    | 1_WT.nd2 | 1  | 7   | 2864 | 1 | 188.1  |
| 8    | 1_WT.nd2 | 1  | 8   | 3790 | 1 | 183.01 |
| 9    | 1_WT.nd2 | 1  | 9   | 4047 | 1 | 180.34 |
| 10   | 1_WT.nd2 | 1  | 10  | 2827 | 1 | 174.48 |
| 11   | 1_WT.nd2 | 1  | 11  | 2790 | 1 | 176    |
| 12   | 1_WT.nd2 | 1  | 12  | 3649 | 1 | 173.44 |
| 13   | 1_WT.nd2 | 1  | 13  | 3873 | 1 | 174.73 |
| 14   | 1_WT.nd2 | 1  | 14  | 3557 | 1 | 166    |
| 15   | 1_WT.nd2 | 1  | 15  | 3449 | 1 | 165.59 |
| 16   | 1_WT.nd2 | 1  | 16  | 3204 | 1 | 167.86 |
| 17   | 1_WT.nd2 | 1  | 17  | 2723 | 1 | 153.83 |
| 18   | 1_WT.nd2 | 1  | 18  | 2796 | 1 | 0      |
| 19   | 1_WT.nd2 | 1  | 19  | 3378 | 1 | 33     |
| 20   | 1_WT.nd2 | 1  | 20  | 3499 | 1 | 33.73  |
| 21   | 1_WT.nd2 | 1  | 21  | 3172 | 1 | 35.11  |
| 22   | 1_WT.nd2 | 1  | 22  | 4348 | 2 | 34.13  |
| 23   | 1_WT.nd2 | 1  | 23  | 5016 | 2 | 35.01  |
| 24   | 1_WT.nd2 | 1  | 24  | 3808 | 1 | 40.82  |
| 25   | 1_WT.nd2 | 1  | 25  | 3830 | 1 | 43.83  |
| 26   | 1_WT.nd2 | 1  | 26  | 3839 | 1 | 37     |
| 27   | 1_WT.nd2 | 1  | 27  | 3629 | 1 | 50.61  |
| 28   | 1_WT.nd2 | 1  | 28  | 2806 | 1 | 45.19  |
| 29   | 1_WT.nd2 | 1  | 29  | 3475 | 1 | 42.43  |
| 30   | 1_WT.nd2 | 1  | 30  | 2533 | 1 | 59.41  |
| 31   | 1_WT.nd2 | 1  | 31  | 2642 | 1 | 57.43  |
| 32   | 1_WT.nd2 | 1  | 32  | 3370 | 1 | 62.37  |
| 33   | 1_WT.nd2 | 1  | 33  | 2784 | 1 | 69.77  |
| 34   | 1_WT.nd2 | 1  | 34  | 3137 | 1 | 81.6   |
| 35   | 1_WT.nd2 | 1  | 35  | 3956 | 1 | 16.28  |
| 36   | 1_WT.nd2 | 1  | 36  | 2975 | 1 | 5      |
| 37   | 1_WT.nd2 | 1  | 37  | 3242 | 1 | 10.63  |
| 38   | 1_WT.nd2 | 1  | 38  | 4399 | 2 | 22.67  |
| 39   | 1_WT.nd2 | 1  | 39  | 4487 | 2 | 25.5   |

|    |          |   |    |       |   |        |
|----|----------|---|----|-------|---|--------|
| 40 | 1_WT.nd2 | 1 | 40 | 7439  | 3 | 35.23  |
| 41 | 1_WT.nd2 | 1 | 41 | 5284  | 2 | 44.6   |
| 42 | 1_WT.nd2 | 1 | 42 | 3478  | 1 | 51     |
| 43 | 1_WT.nd2 | 1 | 43 | 2869  | 1 | 75.21  |
| 44 | 1_WT.nd2 | 1 | 44 | 3485  | 1 | 58.9   |
| 45 | 1_WT.nd2 | 1 | 45 | 4758  | 2 | 64.5   |
| 46 | 1_WT.nd2 | 1 | 46 | 4350  | 2 | 71.28  |
| 47 | 1_WT.nd2 | 1 | 47 | 3085  | 1 | 81.88  |
| 48 | 1_WT.nd2 | 1 | 48 | 3113  | 1 | 70     |
| 49 | 1_WT.nd2 | 1 | 49 | 6470  | 2 | 90.8   |
| 50 | 1_WT.nd2 | 1 | 50 | 3472  | 1 | 95.43  |
| 51 | 1_WT.nd2 | 1 | 51 | 2347  | 1 | 270.93 |
| 52 | 1_WT.nd2 | 1 | 52 | 2687  | 1 | 84.72  |
| 53 | 1_WT.nd2 | 1 | 53 | 3083  | 1 | 130.82 |
| 54 | 1_WT.nd2 | 1 | 54 | 2840  | 1 | 48.02  |
| 55 | 1_WT.nd2 | 1 | 55 | 2966  | 1 | 20.22  |
| 56 | 1_WT.nd2 | 1 | 56 | 6582  | 2 | 8      |
| 57 | 1_WT.nd2 | 1 | 57 | 4577  | 2 | 6      |
| 58 | 1_WT.nd2 | 1 | 58 | 3426  | 1 | 66.27  |
| 59 | 1_WT.nd2 | 1 | 59 | 5856  | 2 | 5      |
| 60 | 1_WT.nd2 | 1 | 60 | 3427  | 1 | 13.6   |
| 61 | 1_WT.nd2 | 1 | 61 | 3494  | 1 | 71     |
| 62 | 1_WT.nd2 | 1 | 62 | 4331  | 2 | 2      |
| 63 | 1_WT.nd2 | 1 | 63 | 5214  | 2 | 16     |
| 64 | 1_WT.nd2 | 1 | 64 | 4323  | 2 | 0      |
| 65 | 1_WT.nd2 | 1 | 65 | 3925  | 1 | 7.28   |
| 66 | 1_WT.nd2 | 1 | 66 | 7323  | 3 | 30.15  |
| 67 | 1_WT.nd2 | 1 | 67 | 4214  | 1 | 30.81  |
| 68 | 1_WT.nd2 | 1 | 68 | 4895  | 2 | 51     |
| 69 | 1_WT.nd2 | 1 | 69 | 5130  | 2 | 20.62  |
| 70 | 1_WT.nd2 | 1 | 70 | 2645  | 1 | 78.1   |
| 71 | 1_WT.nd2 | 1 | 71 | 3357  | 1 | 31.38  |
| 72 | 1_WT.nd2 | 1 | 72 | 2449  | 1 | 183.66 |
| 73 | 1_WT.nd2 | 1 | 73 | 4427  | 2 | 21.47  |
| 74 | 1_WT.nd2 | 1 | 74 | 3404  | 1 | 3      |
| 75 | 1_WT.nd2 | 1 | 75 | 3089  | 1 | 118.95 |
| 76 | 1_WT.nd2 | 1 | 76 | 2547  | 1 | 81.25  |
| 77 | 1_WT.nd2 | 1 | 77 | 3863  | 1 | 8.6    |
| 78 | 1_WT.nd2 | 1 | 78 | 10911 | 4 | 85.38  |
| 79 | 1_WT.nd2 | 1 | 79 | 4124  | 1 | 0      |
| 80 | 1_WT.nd2 | 1 | 80 | 3026  | 1 | 0      |
| 81 | 1_WT.nd2 | 1 | 81 | 3368  | 1 | 2      |
| 82 | 1_WT.nd2 | 1 | 82 | 2673  | 1 | 23.02  |

|     |          |   |     |      |   |        |
|-----|----------|---|-----|------|---|--------|
| 83  | 1_WT.nd2 | 1 | 83  | 3848 | 1 | 3      |
| 84  | 1_WT.nd2 | 1 | 84  | 4034 | 1 | 61.52  |
| 85  | 1_WT.nd2 | 1 | 85  | 3908 | 1 | 101.97 |
| 86  | 1_WT.nd2 | 1 | 86  | 3264 | 1 | 130.86 |
| 87  | 1_WT.nd2 | 1 | 87  | 5028 | 2 | 11.18  |
| 88  | 1_WT.nd2 | 1 | 88  | 3209 | 1 | 18.36  |
| 89  | 1_WT.nd2 | 1 | 89  | 3525 | 1 | 122.2  |
| 90  | 1_WT.nd2 | 1 | 90  | 2779 | 1 | 122.41 |
| 91  | 1_WT.nd2 | 1 | 91  | 3022 | 1 | 126.53 |
| 92  | 1_WT.nd2 | 1 | 92  | 4494 | 2 | 24.04  |
| 93  | 1_WT.nd2 | 1 | 93  | 4306 | 2 | 127.95 |
| 94  | 1_WT.nd2 | 1 | 94  | 2946 | 1 | 108.45 |
| 95  | 1_WT.nd2 | 1 | 95  | 3441 | 1 | 121.61 |
| 96  | 1_WT.nd2 | 1 | 96  | 3057 | 1 | 112.11 |
| 97  | 1_WT.nd2 | 1 | 97  | 3856 | 1 | 105    |
| 98  | 1_WT.nd2 | 1 | 98  | 3224 | 1 | 96.54  |
| 99  | 1_WT.nd2 | 1 | 99  | 2831 | 1 | 40.79  |
| 100 | 1_WT.nd2 | 1 | 100 | 3195 | 1 | 101.26 |
| 101 | 1_WT.nd2 | 1 | 101 | 2781 | 1 | 94.56  |
| 102 | 1_WT.nd2 | 1 | 102 | 3720 | 1 | 88.01  |
| 103 | 1_WT.nd2 | 1 | 103 | 2762 | 1 | 100.21 |
| 104 | 1_WT.nd2 | 1 | 104 | 2856 | 1 | 47.54  |
| 105 | 1_WT.nd2 | 1 | 105 | 2721 | 1 | 40     |
| 106 | 1_WT.nd2 | 1 | 106 | 2706 | 1 | 37.34  |
| 107 | 1_WT.nd2 | 1 | 107 | 2514 | 1 | 80.13  |
| 108 | 1_WT.nd2 | 1 | 108 | 2978 | 1 | 67.12  |
| 109 | 1_WT.nd2 | 1 | 109 | 2719 | 1 | 21.84  |
| 110 | 1_WT.nd2 | 1 | 110 | 3017 | 1 | 14.42  |
| 111 | 1_WT.nd2 | 1 | 111 | 3382 | 1 | 38.64  |
| 112 | 1_WT.nd2 | 1 | 112 | 3382 | 1 | 28.86  |
| 113 | 1_WT.nd2 | 1 | 113 | 3438 | 1 | 12     |
| 114 | 1_WT.nd2 | 1 | 114 | 3552 | 1 | 63.56  |
| 115 | 1_WT.nd2 | 2 | 1   | 2465 | 1 | 273.12 |
| 116 | 1_WT.nd2 | 2 | 2   | 2500 | 1 | 44.42  |
| 117 | 1_WT.nd2 | 2 | 3   | 3764 | 1 | 35.61  |
| 118 | 1_WT.nd2 | 2 | 4   | 3531 | 1 | 26.87  |
| 119 | 1_WT.nd2 | 2 | 5   | 4046 | 1 | 19.8   |
| 120 | 1_WT.nd2 | 2 | 6   | 3533 | 1 | 5      |
| 121 | 1_WT.nd2 | 2 | 7   | 2582 | 1 | 0      |
| 122 | 1_WT.nd2 | 2 | 8   | 2376 | 1 | 6.32   |
| 123 | 1_WT.nd2 | 2 | 9   | 2304 | 1 | 16.64  |
| 124 | 1_WT.nd2 | 2 | 10  | 2805 | 1 | 38.47  |
| 125 | 1_WT.nd2 | 2 | 11  | 3293 | 1 | 27     |

|     |          |   |    |      |   |        |
|-----|----------|---|----|------|---|--------|
| 126 | 1_WT.nd2 | 2 | 12 | 3195 | 1 | 18     |
| 127 | 1_WT.nd2 | 2 | 13 | 2536 | 1 | 52.35  |
| 128 | 1_WT.nd2 | 2 | 14 | 4889 | 2 | 12.04  |
| 129 | 1_WT.nd2 | 2 | 15 | 2592 | 1 | 32.8   |
| 130 | 1_WT.nd2 | 2 | 16 | 2817 | 1 | 69.03  |
| 131 | 1_WT.nd2 | 2 | 17 | 2948 | 1 | 88.6   |
| 132 | 1_WT.nd2 | 2 | 18 | 3286 | 1 | 87.46  |
| 133 | 1_WT.nd2 | 2 | 19 | 3039 | 1 | 85.59  |
| 134 | 1_WT.nd2 | 2 | 20 | 3041 | 1 | 73.41  |
| 135 | 1_WT.nd2 | 2 | 21 | 3760 | 1 | 94.4   |
| 136 | 1_WT.nd2 | 2 | 22 | 2730 | 1 | 75.96  |
| 137 | 1_WT.nd2 | 2 | 23 | 2873 | 1 | 96.8   |
| 138 | 1_WT.nd2 | 2 | 24 | 2925 | 1 | 85.87  |
| 139 | 1_WT.nd2 | 2 | 25 | 2941 | 1 | 95.34  |
| 140 | 1_WT.nd2 | 2 | 26 | 4708 | 2 | 99.13  |
| 141 | 1_WT.nd2 | 2 | 27 | 3625 | 1 | 112.51 |
| 142 | 1_WT.nd2 | 2 | 28 | 2395 | 1 | 103.17 |
| 143 | 1_WT.nd2 | 2 | 29 | 2739 | 1 | 98.08  |
| 144 | 1_WT.nd2 | 2 | 30 | 2189 | 1 | 85.59  |
| 145 | 1_WT.nd2 | 2 | 31 | 4304 | 2 | 104.62 |
| 146 | 1_WT.nd2 | 2 | 32 | 2863 | 1 | 100.5  |
| 147 | 1_WT.nd2 | 2 | 33 | 3126 | 1 | 0      |
| 148 | 1_WT.nd2 | 2 | 34 | 2526 | 1 | 84.77  |
| 149 | 1_WT.nd2 | 2 | 35 | 3454 | 1 | 55     |
| 150 | 1_WT.nd2 | 2 | 36 | 3762 | 1 | 0      |
| 151 | 1_WT.nd2 | 2 | 37 | 2770 | 1 | 85     |
| 152 | 1_WT.nd2 | 2 | 38 | 3549 | 1 | 0      |
| 153 | 1_WT.nd2 | 2 | 39 | 2984 | 1 | 101.91 |
| 154 | 1_WT.nd2 | 2 | 40 | 3342 | 1 | 92.42  |
| 155 | 1_WT.nd2 | 2 | 41 | 3603 | 1 | 91.55  |
| 156 | 1_WT.nd2 | 2 | 42 | 3460 | 1 | 112    |
| 157 | 1_WT.nd2 | 2 | 43 | 5890 | 2 | 88.41  |
| 158 | 1_WT.nd2 | 2 | 44 | 3891 | 1 | 7      |
| 159 | 1_WT.nd2 | 2 | 45 | 2354 | 1 | 120.37 |
| 160 | 1_WT.nd2 | 2 | 46 | 3890 | 1 | 96.26  |
| 161 | 1_WT.nd2 | 2 | 47 | 2381 | 1 | 118.6  |
| 162 | 1_WT.nd2 | 2 | 48 | 4284 | 2 | 105.31 |
| 163 | 1_WT.nd2 | 2 | 49 | 2752 | 1 | 115.66 |
| 164 | 1_WT.nd2 | 2 | 50 | 2891 | 1 | 69.3   |
| 165 | 1_WT.nd2 | 2 | 51 | 2490 | 1 | 36     |
| 166 | 1_WT.nd2 | 2 | 52 | 2718 | 1 | 108.41 |
| 167 | 1_WT.nd2 | 2 | 53 | 4558 | 2 | 23.02  |
| 168 | 1_WT.nd2 | 2 | 54 | 2789 | 1 | 49.74  |



|     |          |   |    |      |   |        |
|-----|----------|---|----|------|---|--------|
| 169 | 1_WT.nd2 | 2 | 55 | 2562 | 1 | 107.45 |
| 170 | 1_WT.nd2 | 2 | 56 | 3424 | 1 | 94.43  |
| 171 | 1_WT.nd2 | 2 | 57 | 2708 | 1 | 30     |
| 172 | 1_WT.nd2 | 2 | 58 | 4552 | 2 | 102.69 |
| 173 | 1_WT.nd2 | 2 | 59 | 3458 | 1 | 38.6   |
| 174 | 1_WT.nd2 | 2 | 60 | 2779 | 1 | 36.24  |
| 175 | 1_WT.nd2 | 2 | 61 | 3892 | 1 | 82.76  |
| 176 | 1_WT.nd2 | 2 | 62 | 2927 | 1 | 107    |
| 177 | 1_WT.nd2 | 2 | 63 | 4461 | 2 | 75.15  |
| 178 | 1_WT.nd2 | 2 | 64 | 3740 | 1 | 46.62  |
| 179 | 1_WT.nd2 | 2 | 65 | 4688 | 2 | 51.11  |
| 180 | 1_WT.nd2 | 2 | 66 | 2906 | 1 | 62.65  |
| 181 | 1_WT.nd2 | 2 | 67 | 3577 | 1 | 46.01  |
| 182 | 1_WT.nd2 | 2 | 68 | 4598 | 2 | 50.04  |
| 183 | 1_WT.nd2 | 2 | 69 | 3084 | 1 | 51     |
| 184 | 1_WT.nd2 | 2 | 70 | 3094 | 1 | 13.89  |
| 185 | 1_WT.nd2 | 2 | 71 | 2766 | 1 | 0      |
| 186 | 1_WT.nd2 | 2 | 72 | 3194 | 1 | 62     |
| 187 | 1_WT.nd2 | 2 | 73 | 3877 | 1 | 69.46  |
| 188 | 1_WT.nd2 | 2 | 74 | 3542 | 1 | 65.03  |
| 189 | 1_WT.nd2 | 2 | 75 | 3928 | 1 | 71.51  |
| 190 | 1_WT.nd2 | 2 | 76 | 3577 | 1 | 69.38  |
| 191 | 1_WT.nd2 | 2 | 77 | 4453 | 2 | 68.25  |
| 192 | 1_WT.nd2 | 2 | 78 | 2505 | 1 | 128.46 |
| 193 | 1_WT.nd2 | 2 | 79 | 3247 | 1 | 72.99  |
| 194 | 1_WT.nd2 | 2 | 80 | 2845 | 1 | 87     |
| 195 | 1_WT.nd2 | 2 | 81 | 4739 | 2 | 0      |
| 196 | 1_WT.nd2 | 2 | 82 | 3126 | 1 | 95.88  |
| 197 | 1_WT.nd2 | 2 | 83 | 2825 | 1 | 44.15  |
| 198 | 1_WT.nd2 | 2 | 84 | 3047 | 1 | 113.23 |
| 199 | 1_WT.nd2 | 2 | 85 | 3060 | 1 | 105.19 |
| 200 | 1_WT.nd2 | 2 | 86 | 2507 | 1 | 76.69  |
| 201 | 1_WT.nd2 | 2 | 87 | 4484 | 2 | 121.59 |
| 202 | 1_WT.nd2 | 2 | 88 | 4187 | 1 | 106.92 |
| 203 | 1_WT.nd2 | 2 | 89 | 2969 | 1 | 113.76 |
| 204 | 1_WT.nd2 | 2 | 90 | 3083 | 1 | 119.97 |
| 205 | 1_WT.nd2 | 2 | 91 | 3210 | 1 | 133.72 |
| 206 | 1_WT.nd2 | 2 | 92 | 3454 | 1 | 131.67 |
| 207 | 1_WT.nd2 | 2 | 93 | 4884 | 2 | 147.65 |
| 208 | 1_WT.nd2 | 2 | 94 | 3834 | 1 | 147.33 |
| 209 | 1_WT.nd2 | 2 | 95 | 3967 | 1 | 123.15 |
| 210 | 1_WT.nd2 | 2 | 96 | 3350 | 1 | 45.61  |
| 211 | 1_WT.nd2 | 2 | 97 | 4277 | 2 | 58.6   |

|     |          |   |     |      |   |        |
|-----|----------|---|-----|------|---|--------|
| 212 | 1_WT.nd2 | 2 | 98  | 4033 | 1 | 73.5   |
| 213 | 1_WT.nd2 | 2 | 99  | 4503 | 2 | 65.76  |
| 214 | 1_WT.nd2 | 2 | 100 | 3607 | 1 | 73.54  |
| 215 | 1_WT.nd2 | 2 | 101 | 3599 | 1 | 115.97 |
| 216 | 1_WT.nd2 | 2 | 102 | 3643 | 1 | 64.14  |
| 217 | 1_WT.nd2 | 2 | 103 | 3188 | 1 | 60.22  |
| 218 | 1_WT.nd2 | 2 | 104 | 2414 | 1 | 131.49 |
| 219 | 1_WT.nd2 | 2 | 105 | 3559 | 1 | 130.3  |
| 220 | 1_WT.nd2 | 2 | 106 | 2839 | 1 | 62.65  |
| 221 | 1_WT.nd2 | 2 | 107 | 2580 | 1 | 88.87  |
| 222 | 1_WT.nd2 | 2 | 108 | 2955 | 1 | 74.32  |
| 223 | 1_WT.nd2 | 2 | 109 | 3404 | 1 | 13.34  |
| 224 | 1_WT.nd2 | 2 | 110 | 3112 | 1 | 60.83  |
| 225 | 1_WT.nd2 | 2 | 111 | 2877 | 1 | 53.16  |
| 226 | 1_WT.nd2 | 2 | 112 | 3622 | 1 | 40.26  |
| 227 | 1_WT.nd2 | 2 | 113 | 2537 | 1 | 138.29 |
| 228 | 1_WT.nd2 | 2 | 114 | 2932 | 1 | 12.81  |
| 229 | 1_WT.nd2 | 2 | 115 | 3043 | 1 | 25     |
| 230 | 1_WT.nd2 | 2 | 116 | 3031 | 1 | 109    |
| 231 | 1_WT.nd2 | 2 | 117 | 3093 | 1 | 0      |
| 232 | 1_WT.nd2 | 2 | 118 | 3306 | 1 | 0      |
| 233 | 1_WT.nd2 | 2 | 119 | 2735 | 1 | 48.75  |
| 234 | 1_WT.nd2 | 2 | 120 | 5253 | 2 | 0      |
| 235 | 1_WT.nd2 | 2 | 121 | 2894 | 1 | 0      |
| 236 | 1_WT.nd2 | 2 | 122 | 2956 | 1 | 6      |
| 237 | 1_WT.nd2 | 3 | 1   | 3275 | 1 | 298.61 |
| 238 | 1_WT.nd2 | 3 | 2   | 2854 | 1 | 284.04 |
| 239 | 1_WT.nd2 | 3 | 3   | 4487 | 2 | 285.48 |
| 240 | 1_WT.nd2 | 3 | 4   | 3544 | 1 | 290.77 |
| 241 | 1_WT.nd2 | 3 | 5   | 2895 | 1 | 290.49 |
| 242 | 1_WT.nd2 | 3 | 6   | 2186 | 1 | 194.4  |
| 243 | 1_WT.nd2 | 3 | 7   | 3600 | 1 | 291.63 |
| 244 | 1_WT.nd2 | 3 | 8   | 2672 | 1 | 59.3   |
| 245 | 1_WT.nd2 | 3 | 9   | 2254 | 1 | 60.93  |
| 246 | 1_WT.nd2 | 3 | 10  | 2446 | 1 | 40.22  |
| 247 | 1_WT.nd2 | 3 | 11  | 2935 | 1 | 5.39   |
| 248 | 1_WT.nd2 | 3 | 12  | 3393 | 1 | 14.56  |
| 249 | 1_WT.nd2 | 3 | 13  | 2391 | 1 | 0      |
| 250 | 1_WT.nd2 | 3 | 14  | 3410 | 1 | 0      |
| 251 | 1_WT.nd2 | 3 | 15  | 3633 | 1 | 10     |
| 252 | 1_WT.nd2 | 3 | 16  | 4448 | 2 | 16.12  |
| 253 | 1_WT.nd2 | 3 | 17  | 3554 | 1 | 22.8   |
| 254 | 1_WT.nd2 | 3 | 18  | 3101 | 1 | 3      |

|     |          |   |    |      |   |        |
|-----|----------|---|----|------|---|--------|
| 255 | 1_WT.nd2 | 3 | 19 | 3241 | 1 | 29.83  |
| 256 | 1_WT.nd2 | 3 | 20 | 2251 | 1 | 107.3  |
| 257 | 1_WT.nd2 | 3 | 21 | 2935 | 1 | 12.53  |
| 258 | 1_WT.nd2 | 3 | 22 | 2944 | 1 | 61.4   |
| 259 | 1_WT.nd2 | 3 | 23 | 3816 | 1 | 42.8   |
| 260 | 1_WT.nd2 | 3 | 24 | 8395 | 3 | 66.48  |
| 261 | 1_WT.nd2 | 3 | 25 | 2815 | 1 | 79.76  |
| 262 | 1_WT.nd2 | 3 | 26 | 3149 | 1 | 83.76  |
| 263 | 1_WT.nd2 | 3 | 27 | 3145 | 1 | 87.8   |
| 264 | 1_WT.nd2 | 3 | 28 | 2810 | 1 | 99.9   |
| 265 | 1_WT.nd2 | 3 | 29 | 3275 | 1 | 119.75 |
| 266 | 1_WT.nd2 | 3 | 30 | 2913 | 1 | 132.28 |
| 267 | 1_WT.nd2 | 3 | 31 | 3116 | 1 | 138.6  |
| 268 | 1_WT.nd2 | 3 | 32 | 2741 | 1 | 128.86 |
| 269 | 1_WT.nd2 | 3 | 33 | 2442 | 1 | 134.62 |
| 270 | 1_WT.nd2 | 3 | 34 | 2885 | 1 | 141.83 |
| 271 | 1_WT.nd2 | 3 | 35 | 3810 | 1 | 144.25 |
| 272 | 1_WT.nd2 | 3 | 36 | 3476 | 1 | 150.59 |
| 273 | 1_WT.nd2 | 3 | 37 | 3625 | 1 | 149.41 |
| 274 | 1_WT.nd2 | 3 | 38 | 2938 | 1 | 160.7  |
| 275 | 1_WT.nd2 | 3 | 39 | 5029 | 2 | 168.63 |
| 276 | 1_WT.nd2 | 3 | 40 | 3252 | 1 | 143.2  |
| 277 | 1_WT.nd2 | 3 | 41 | 5102 | 2 | 178.22 |
| 278 | 1_WT.nd2 | 3 | 42 | 3056 | 1 | 155.62 |
| 279 | 1_WT.nd2 | 3 | 43 | 5184 | 2 | 174.45 |
| 280 | 1_WT.nd2 | 3 | 44 | 3092 | 1 | 158.6  |
| 281 | 1_WT.nd2 | 3 | 45 | 5871 | 2 | 176.3  |
| 282 | 1_WT.nd2 | 3 | 46 | 6806 | 2 | 180.25 |
| 283 | 1_WT.nd2 | 3 | 47 | 5471 | 2 | 188.73 |
| 284 | 1_WT.nd2 | 3 | 48 | 2501 | 1 | 378.36 |
| 285 | 1_WT.nd2 | 3 | 49 | 3451 | 1 | 196.35 |
| 286 | 1_WT.nd2 | 3 | 50 | 3972 | 1 | 193.83 |
| 287 | 1_WT.nd2 | 3 | 51 | 3344 | 1 | 203.12 |
| 288 | 1_WT.nd2 | 3 | 52 | 5232 | 2 | 195.39 |
| 289 | 1_WT.nd2 | 3 | 53 | 3884 | 1 | 197.4  |
| 290 | 1_WT.nd2 | 3 | 54 | 4077 | 1 | 196.12 |
| 291 | 1_WT.nd2 | 3 | 55 | 4649 | 2 | 194.49 |
| 292 | 1_WT.nd2 | 3 | 56 | 3930 | 1 | 184.45 |
| 293 | 1_WT.nd2 | 3 | 57 | 2650 | 1 | 177.28 |
| 294 | 1_WT.nd2 | 3 | 58 | 5381 | 2 | 180.62 |
| 295 | 1_WT.nd2 | 3 | 59 | 4439 | 2 | 223.71 |
| 296 | 1_WT.nd2 | 3 | 60 | 4695 | 2 | 220.48 |
| 297 | 1_WT.nd2 | 3 | 61 | 5533 | 2 | 230.59 |

|     |          |   |     |      |   |        |
|-----|----------|---|-----|------|---|--------|
| 298 | 1_WT.nd2 | 3 | 62  | 3705 | 1 | 213.1  |
| 299 | 1_WT.nd2 | 3 | 63  | 3591 | 1 | 206.61 |
| 300 | 1_WT.nd2 | 3 | 64  | 3941 | 1 | 235.28 |
| 301 | 1_WT.nd2 | 3 | 65  | 3921 | 1 | 192.75 |
| 302 | 1_WT.nd2 | 3 | 66  | 3118 | 1 | 174    |
| 303 | 1_WT.nd2 | 3 | 67  | 3829 | 1 | 234.7  |
| 304 | 1_WT.nd2 | 3 | 68  | 2746 | 1 | 73.41  |
| 305 | 1_WT.nd2 | 3 | 69  | 2765 | 1 | 55.08  |
| 306 | 1_WT.nd2 | 3 | 70  | 2783 | 1 | 313.44 |
| 307 | 1_WT.nd2 | 3 | 71  | 3433 | 1 | 346.07 |
| 308 | 1_WT.nd2 | 3 | 72  | 3451 | 1 | 55.47  |
| 309 | 1_WT.nd2 | 3 | 73  | 3332 | 1 | 341.84 |
| 310 | 1_WT.nd2 | 3 | 74  | 3111 | 1 | 41.87  |
| 311 | 1_WT.nd2 | 3 | 75  | 3088 | 1 | 337.43 |
| 312 | 1_WT.nd2 | 3 | 76  | 5183 | 2 | 29     |
| 313 | 1_WT.nd2 | 3 | 77  | 4315 | 2 | 14     |
| 314 | 1_WT.nd2 | 3 | 78  | 2513 | 1 | 330.39 |
| 315 | 1_WT.nd2 | 3 | 79  | 4013 | 1 | 291.44 |
| 316 | 1_WT.nd2 | 3 | 80  | 8679 | 3 | 18.38  |
| 317 | 1_WT.nd2 | 3 | 81  | 6023 | 2 | 12.73  |
| 318 | 1_WT.nd2 | 3 | 82  | 4932 | 2 | 4      |
| 319 | 1_WT.nd2 | 3 | 83  | 4063 | 1 | 49     |
| 320 | 1_WT.nd2 | 3 | 84  | 4625 | 2 | 0      |
| 321 | 1_WT.nd2 | 3 | 85  | 3561 | 1 | 0      |
| 322 | 1_WT.nd2 | 3 | 86  | 3064 | 1 | 4      |
| 323 | 1_WT.nd2 | 3 | 87  | 3486 | 1 | 9.22   |
| 324 | 1_WT.nd2 | 3 | 88  | 3800 | 1 | 18.6   |
| 325 | 1_WT.nd2 | 3 | 89  | 2423 | 1 | 8.25   |
| 326 | 1_WT.nd2 | 3 | 90  | 2932 | 1 | 31.78  |
| 327 | 1_WT.nd2 | 3 | 91  | 3091 | 1 | 44.2   |
| 328 | 1_WT.nd2 | 3 | 92  | 3071 | 1 | 53.24  |
| 329 | 1_WT.nd2 | 3 | 93  | 3975 | 1 | 64.4   |
| 330 | 1_WT.nd2 | 3 | 94  | 3484 | 1 | 75.58  |
| 331 | 1_WT.nd2 | 3 | 95  | 4060 | 1 | 44.28  |
| 332 | 1_WT.nd2 | 3 | 96  | 2764 | 1 | 49.03  |
| 333 | 1_WT.nd2 | 3 | 97  | 3031 | 1 | 66     |
| 334 | 1_WT.nd2 | 3 | 98  | 2362 | 1 | 127.26 |
| 335 | 1_WT.nd2 | 3 | 99  | 4442 | 2 | 55.01  |
| 336 | 1_WT.nd2 | 3 | 100 | 4353 | 2 | 48.84  |
| 337 | 1_WT.nd2 | 3 | 101 | 3191 | 1 | 52.55  |
| 338 | 1_WT.nd2 | 3 | 102 | 4472 | 2 | 48.85  |
| 339 | 1_WT.nd2 | 3 | 103 | 3593 | 1 | 123.23 |
| 340 | 1_WT.nd2 | 3 | 104 | 3454 | 1 | 54.82  |

|     |          |   |     |      |   |        |
|-----|----------|---|-----|------|---|--------|
| 341 | 1_WT.nd2 | 3 | 105 | 3012 | 1 | 48.3   |
| 342 | 1_WT.nd2 | 3 | 106 | 2991 | 1 | 125.18 |
| 343 | 1_WT.nd2 | 3 | 107 | 2743 | 1 | 7      |
| 344 | 1_WT.nd2 | 3 | 108 | 4660 | 2 | 105.95 |
| 345 | 1_WT.nd2 | 3 | 109 | 3122 | 1 | 100.24 |
| 346 | 1_WT.nd2 | 3 | 110 | 3378 | 1 | 114.48 |
| 347 | 1_WT.nd2 | 3 | 111 | 5585 | 2 | 114.81 |
| 348 | 1_WT.nd2 | 3 | 112 | 2772 | 1 | 127.31 |
| 349 | 1_WT.nd2 | 3 | 113 | 3566 | 1 | 128.69 |
| 350 | 1_WT.nd2 | 3 | 114 | 2543 | 1 | 24.21  |
| 351 | 1_WT.nd2 | 3 | 115 | 5471 | 2 | 120.93 |
| 352 | 1_WT.nd2 | 3 | 116 | 2794 | 1 | 18     |
| 353 | 1_WT.nd2 | 3 | 117 | 3716 | 1 | 132.55 |
| 354 | 1_WT.nd2 | 3 | 118 | 3630 | 1 | 124.4  |
| 355 | 1_WT.nd2 | 3 | 119 | 4417 | 2 | 148.49 |
| 356 | 1_WT.nd2 | 3 | 120 | 3051 | 1 | 143.56 |
| 357 | 1_WT.nd2 | 3 | 121 | 2934 | 1 | 156.31 |
| 358 | 1_WT.nd2 | 3 | 122 | 2948 | 1 | 138.11 |
| 359 | 1_WT.nd2 | 3 | 123 | 2722 | 1 | 197.21 |
| 360 | 1_WT.nd2 | 3 | 124 | 2215 | 1 | 194.02 |
| 361 | 1_WT.nd2 | 3 | 125 | 3352 | 1 | 0      |
| 362 | 1_WT.nd2 | 3 | 126 | 2813 | 1 | 0      |
| 363 | 1_WT.nd2 | 3 | 127 | 2724 | 1 | 169.71 |
| 364 | 1_WT.nd2 | 3 | 128 | 4212 | 1 | 35     |
| 365 | 1_WT.nd2 | 3 | 129 | 3981 | 1 | 120.74 |
| 366 | 1_WT.nd2 | 3 | 130 | 2402 | 1 | 157.18 |
| 367 | 1_WT.nd2 | 3 | 131 | 3232 | 1 | 118.09 |
| 368 | 1_WT.nd2 | 3 | 132 | 4278 | 2 | 110.63 |
| 369 | 1_WT.nd2 | 3 | 133 | 6108 | 2 | 122.33 |
| 370 | 1_WT.nd2 | 3 | 134 | 3377 | 1 | 71.2   |
| 371 | 1_WT.nd2 | 3 | 135 | 2723 | 1 | 50     |
| 372 | 1_WT.nd2 | 3 | 136 | 2508 | 1 | 151.35 |
| 373 | 1_WT.nd2 | 3 | 137 | 4466 | 2 | 54.33  |
| 374 | 1_WT.nd2 | 3 | 138 | 2794 | 1 | 63     |
| 375 | 1_WT.nd2 | 3 | 139 | 5000 | 2 | 68.62  |
| 376 | 1_WT.nd2 | 3 | 140 | 3528 | 1 | 85.63  |
| 377 | 1_WT.nd2 | 3 | 141 | 5963 | 2 | 65.79  |
| 378 | 1_WT.nd2 | 3 | 142 | 3234 | 1 | 84.85  |
| 379 | 1_WT.nd2 | 3 | 143 | 4227 | 2 | 57.25  |
| 380 | 1_WT.nd2 | 3 | 144 | 2744 | 1 | 57.78  |
| 381 | 1_WT.nd2 | 3 | 145 | 3393 | 1 | 49.37  |
| 382 | 1_WT.nd2 | 3 | 146 | 3793 | 1 | 62.37  |
| 383 | 1_WT.nd2 | 3 | 147 | 4182 | 1 | 68.62  |

|     |          |   |     |      |   |        |
|-----|----------|---|-----|------|---|--------|
| 384 | 1_WT.nd2 | 3 | 148 | 2918 | 1 | 41.48  |
| 385 | 1_WT.nd2 | 3 | 149 | 6252 | 2 | 48.27  |
| 386 | 1_WT.nd2 | 3 | 150 | 3762 | 1 | 64.35  |
| 387 | 1_WT.nd2 | 3 | 151 | 5844 | 2 | 42.06  |
| 388 | 1_WT.nd2 | 3 | 152 | 2824 | 1 | 50.91  |
| 389 | 1_WT.nd2 | 3 | 153 | 3104 | 1 | 23.43  |
| 390 | 1_WT.nd2 | 3 | 154 | 3549 | 1 | 21.84  |
| 391 | 1_WT.nd2 | 3 | 155 | 2716 | 1 | 154    |
| 392 | 1_WT.nd2 | 4 | 1   | 3188 | 1 | 126.18 |
| 393 | 1_WT.nd2 | 4 | 2   | 3166 | 1 | 263.37 |
| 394 | 1_WT.nd2 | 4 | 3   | 2334 | 1 | 121.02 |
| 395 | 1_WT.nd2 | 4 | 4   | 2450 | 1 | 64.03  |
| 396 | 1_WT.nd2 | 4 | 5   | 2614 | 1 | 81.57  |
| 397 | 1_WT.nd2 | 4 | 6   | 3038 | 1 | 462.35 |
| 398 | 1_WT.nd2 | 4 | 7   | 2664 | 1 | 74.63  |
| 399 | 1_WT.nd2 | 4 | 8   | 4726 | 2 | 86.03  |
| 400 | 1_WT.nd2 | 4 | 9   | 4606 | 2 | 89.84  |
| 401 | 1_WT.nd2 | 4 | 10  | 3792 | 1 | 91.21  |
| 402 | 1_WT.nd2 | 4 | 11  | 3069 | 1 | 109.42 |
| 403 | 1_WT.nd2 | 4 | 12  | 2748 | 1 | 118.46 |
| 404 | 1_WT.nd2 | 4 | 13  | 3912 | 1 | 98.84  |
| 405 | 1_WT.nd2 | 4 | 14  | 2865 | 1 | 107.52 |
| 406 | 1_WT.nd2 | 4 | 15  | 3643 | 1 | 10     |
| 407 | 1_WT.nd2 | 4 | 16  | 4062 | 1 | 129.85 |
| 408 | 1_WT.nd2 | 4 | 17  | 4052 | 1 | 83.41  |
| 409 | 1_WT.nd2 | 4 | 18  | 3029 | 1 | 68.26  |
| 410 | 1_WT.nd2 | 4 | 19  | 3155 | 1 | 65.86  |
| 411 | 1_WT.nd2 | 4 | 20  | 3692 | 1 | 58.83  |
| 412 | 1_WT.nd2 | 4 | 21  | 4248 | 2 | 30     |
| 413 | 1_WT.nd2 | 4 | 22  | 7962 | 3 | 47.71  |
| 414 | 1_WT.nd2 | 4 | 23  | 2830 | 1 | 48.17  |
| 415 | 1_WT.nd2 | 4 | 24  | 3414 | 1 | 40.22  |
| 416 | 1_WT.nd2 | 4 | 25  | 3389 | 1 | 31.06  |
| 417 | 1_WT.nd2 | 4 | 26  | 3896 | 1 | 24.41  |
| 418 | 1_WT.nd2 | 4 | 27  | 2823 | 1 | 66.94  |
| 419 | 1_WT.nd2 | 4 | 28  | 3655 | 1 | 100.28 |
| 420 | 1_WT.nd2 | 4 | 29  | 4861 | 2 | 17.2   |
| 421 | 1_WT.nd2 | 4 | 30  | 3217 | 1 | 10     |
| 422 | 1_WT.nd2 | 4 | 31  | 6821 | 2 | 17.03  |
| 423 | 1_WT.nd2 | 4 | 32  | 3944 | 1 | 5.66   |
| 424 | 1_WT.nd2 | 4 | 33  | 7783 | 3 | 11.31  |
| 425 | 1_WT.nd2 | 4 | 34  | 2675 | 1 | 72.06  |
| 426 | 1_WT.nd2 | 4 | 35  | 6104 | 2 | 2.83   |

|     |          |   |    |      |   |        |
|-----|----------|---|----|------|---|--------|
| 427 | 1_WT.nd2 | 4 | 36 | 3784 | 1 | 77     |
| 428 | 1_WT.nd2 | 4 | 37 | 7009 | 2 | 0      |
| 429 | 1_WT.nd2 | 4 | 38 | 5799 | 2 | 2.24   |
| 430 | 1_WT.nd2 | 4 | 39 | 2430 | 1 | 392    |
| 431 | 1_WT.nd2 | 4 | 40 | 5768 | 2 | 25     |
| 432 | 1_WT.nd2 | 4 | 41 | 3945 | 1 | 4.12   |
| 433 | 1_WT.nd2 | 4 | 42 | 9474 | 3 | 14.76  |
| 434 | 1_WT.nd2 | 4 | 43 | 2743 | 1 | 28.23  |
| 435 | 1_WT.nd2 | 4 | 44 | 4580 | 2 | 28.84  |
| 436 | 1_WT.nd2 | 4 | 45 | 5621 | 2 | 18.44  |
| 437 | 1_WT.nd2 | 4 | 46 | 5176 | 2 | 26     |
| 438 | 1_WT.nd2 | 4 | 47 | 4754 | 2 | 65.55  |
| 439 | 1_WT.nd2 | 4 | 48 | 5529 | 2 | 32.31  |
| 440 | 1_WT.nd2 | 4 | 49 | 3017 | 1 | 41.01  |
| 441 | 1_WT.nd2 | 4 | 50 | 3612 | 1 | 66.65  |
| 442 | 1_WT.nd2 | 4 | 51 | 3129 | 1 | 38.6   |
| 443 | 1_WT.nd2 | 4 | 52 | 5763 | 2 | 46.23  |
| 444 | 1_WT.nd2 | 4 | 53 | 3563 | 1 | 69.63  |
| 445 | 1_WT.nd2 | 4 | 54 | 6198 | 2 | 37.22  |
| 446 | 1_WT.nd2 | 4 | 55 | 3676 | 1 | 42     |
| 447 | 1_WT.nd2 | 4 | 56 | 3839 | 1 | 91.07  |
| 448 | 1_WT.nd2 | 4 | 57 | 4397 | 2 | 74.63  |
| 449 | 1_WT.nd2 | 4 | 58 | 2726 | 1 | 236.14 |
| 450 | 1_WT.nd2 | 4 | 59 | 3629 | 1 | 253.53 |
| 451 | 1_WT.nd2 | 4 | 60 | 2719 | 1 | 133.18 |
| 452 | 1_WT.nd2 | 4 | 61 | 5169 | 2 | 0      |
| 453 | 1_WT.nd2 | 4 | 62 | 4784 | 2 | 9.9    |
| 454 | 1_WT.nd2 | 4 | 63 | 3163 | 1 | 33.53  |
| 455 | 1_WT.nd2 | 4 | 64 | 3593 | 1 | 8.25   |
| 456 | 1_WT.nd2 | 4 | 65 | 3112 | 1 | 62.17  |
| 457 | 1_WT.nd2 | 4 | 66 | 2754 | 1 | 92.07  |
| 458 | 1_WT.nd2 | 4 | 67 | 3087 | 1 | 234.55 |
| 459 | 1_WT.nd2 | 4 | 68 | 3462 | 1 | 16     |
| 460 | 1_WT.nd2 | 4 | 69 | 2972 | 1 | 28.28  |
| 461 | 1_WT.nd2 | 4 | 70 | 3116 | 1 | 21     |
| 462 | 1_WT.nd2 | 4 | 71 | 3452 | 1 | 65.8   |
| 463 | 1_WT.nd2 | 4 | 72 | 4647 | 2 | 26.93  |
| 464 | 1_WT.nd2 | 4 | 73 | 2451 | 1 | 60.83  |
| 465 | 1_WT.nd2 | 4 | 74 | 4118 | 1 | 33.02  |
| 466 | 1_WT.nd2 | 4 | 75 | 3347 | 1 | 37.64  |
| 467 | 1_WT.nd2 | 4 | 76 | 2383 | 1 | 469.66 |
| 468 | 1_WT.nd2 | 4 | 77 | 3312 | 1 | 380.85 |
| 469 | 1_WT.nd2 | 4 | 78 | 3237 | 1 | 398.39 |

|     |          |   |    |      |   |        |
|-----|----------|---|----|------|---|--------|
| 470 | 1_WT.nd2 | 4 | 79 | 2651 | 1 | 428.37 |
| 471 | 1_WT.nd2 | 4 | 80 | 3276 | 1 | 425.63 |
| 472 | 1_WT.nd2 | 4 | 81 | 2610 | 1 | 84     |
| 473 | 1_WT.nd2 | 4 | 82 | 2762 | 1 | 92.2   |
| 474 | 1_WT.nd2 | 4 | 83 | 2780 | 1 | 148.39 |
| 475 | 1_WT.nd2 | 4 | 84 | 4845 | 2 | 117.64 |
| 476 | 1_WT.nd2 | 5 | 1  | 3136 | 1 | 192.42 |
| 477 | 1_WT.nd2 | 5 | 2  | 2398 | 1 | 151.48 |
| 478 | 1_WT.nd2 | 5 | 3  | 2694 | 1 | 13     |
| 479 | 1_WT.nd2 | 5 | 4  | 3096 | 1 | 0      |
| 480 | 1_WT.nd2 | 5 | 5  | 2988 | 1 | 41     |
| 481 | 1_WT.nd2 | 5 | 6  | 4085 | 1 | 22.47  |
| 482 | 1_WT.nd2 | 5 | 7  | 2600 | 1 | 7.62   |
| 483 | 1_WT.nd2 | 5 | 8  | 3969 | 1 | 43.68  |
| 484 | 1_WT.nd2 | 5 | 9  | 2867 | 1 | 3.61   |
| 485 | 1_WT.nd2 | 5 | 10 | 3014 | 1 | 1      |
| 486 | 1_WT.nd2 | 5 | 11 | 3551 | 1 | 7.81   |
| 487 | 1_WT.nd2 | 5 | 12 | 3886 | 1 | 7.21   |
| 488 | 1_WT.nd2 | 5 | 13 | 3208 | 1 | 22.63  |
| 489 | 1_WT.nd2 | 5 | 14 | 4323 | 2 | 18.11  |
| 490 | 1_WT.nd2 | 5 | 15 | 3329 | 1 | 22     |
| 491 | 1_WT.nd2 | 5 | 16 | 4763 | 2 | 27     |
| 492 | 1_WT.nd2 | 5 | 17 | 2728 | 1 | 34.06  |
| 493 | 1_WT.nd2 | 5 | 18 | 4397 | 2 | 35.51  |
| 494 | 1_WT.nd2 | 5 | 19 | 2495 | 1 | 38.29  |
| 495 | 1_WT.nd2 | 5 | 20 | 2740 | 1 | 83     |
| 496 | 1_WT.nd2 | 5 | 21 | 3427 | 1 | 55.15  |
| 497 | 1_WT.nd2 | 5 | 22 | 2607 | 1 | 45.35  |
| 498 | 1_WT.nd2 | 5 | 23 | 3350 | 1 | 44     |
| 499 | 1_WT.nd2 | 5 | 24 | 2884 | 1 | 67     |
| 500 | 1_WT.nd2 | 5 | 25 | 2899 | 1 | 60     |
| 501 | 1_WT.nd2 | 5 | 26 | 3079 | 1 | 69.12  |
| 502 | 1_WT.nd2 | 5 | 27 | 2952 | 1 | 92.4   |
| 503 | 1_WT.nd2 | 5 | 28 | 3407 | 1 | 101.59 |
| 504 | 1_WT.nd2 | 5 | 29 | 3487 | 1 | 46.82  |
| 505 | 1_WT.nd2 | 5 | 30 | 2484 | 1 | 54.71  |
| 506 | 1_WT.nd2 | 5 | 31 | 4837 | 2 | 41.59  |
| 507 | 1_WT.nd2 | 5 | 32 | 3522 | 1 | 71.59  |
| 508 | 1_WT.nd2 | 5 | 33 | 4784 | 2 | 35.36  |
| 509 | 1_WT.nd2 | 5 | 34 | 3730 | 1 | 105.3  |
| 510 | 1_WT.nd2 | 5 | 35 | 3341 | 1 | 29     |
| 511 | 1_WT.nd2 | 5 | 36 | 2693 | 1 | 111.04 |
| 512 | 1_WT.nd2 | 5 | 37 | 5619 | 2 | 23.35  |



|     |          |   |    |      |   |        |
|-----|----------|---|----|------|---|--------|
| 513 | 1_WT.nd2 | 5 | 38 | 3888 | 1 | 92.2   |
| 514 | 1_WT.nd2 | 5 | 39 | 4024 | 1 | 17.69  |
| 515 | 1_WT.nd2 | 5 | 40 | 5868 | 2 | 12.04  |
| 516 | 1_WT.nd2 | 5 | 41 | 5906 | 2 | 6.4    |
| 517 | 1_WT.nd2 | 5 | 42 | 4444 | 2 | 2      |
| 518 | 1_WT.nd2 | 5 | 43 | 3088 | 1 | 46     |
| 519 | 1_WT.nd2 | 5 | 44 | 6603 | 2 | 0      |
| 520 | 1_WT.nd2 | 5 | 45 | 4290 | 2 | 0      |
| 521 | 1_WT.nd2 | 5 | 46 | 6182 | 2 | 1      |
| 522 | 1_WT.nd2 | 5 | 47 | 2347 | 1 | 93.19  |
| 523 | 1_WT.nd2 | 5 | 48 | 2636 | 1 | 33     |
| 524 | 1_WT.nd2 | 5 | 49 | 4705 | 2 | 2      |
| 525 | 1_WT.nd2 | 5 | 50 | 5742 | 2 | 1      |
| 526 | 1_WT.nd2 | 5 | 51 | 2374 | 1 | 214.35 |
| 527 | 1_WT.nd2 | 5 | 52 | 4664 | 2 | 8.06   |
| 528 | 1_WT.nd2 | 5 | 53 | 3542 | 1 | 16     |
| 529 | 1_WT.nd2 | 5 | 54 | 4807 | 2 | 21.19  |
| 530 | 1_WT.nd2 | 5 | 55 | 2424 | 1 | 150.03 |
| 531 | 1_WT.nd2 | 5 | 56 | 2881 | 1 | 98     |
| 532 | 1_WT.nd2 | 5 | 57 | 3801 | 1 | 30.07  |
| 533 | 1_WT.nd2 | 5 | 58 | 2854 | 1 | 47.42  |
| 534 | 1_WT.nd2 | 5 | 59 | 4027 | 1 | 39.22  |
| 535 | 1_WT.nd2 | 5 | 60 | 2604 | 1 | 70.18  |
| 536 | 1_WT.nd2 | 5 | 61 | 2875 | 1 | 88     |
| 537 | 1_WT.nd2 | 5 | 62 | 7834 | 3 | 49     |
| 538 | 1_WT.nd2 | 5 | 63 | 2603 | 1 | 69.66  |
| 539 | 1_WT.nd2 | 5 | 64 | 5029 | 2 | 58     |
| 540 | 1_WT.nd2 | 5 | 65 | 2753 | 1 | 0      |
| 541 | 1_WT.nd2 | 5 | 66 | 3143 | 1 | 0      |
| 542 | 1_WT.nd2 | 5 | 67 | 2328 | 1 | 11.4   |
| 543 | 1_WT.nd2 | 5 | 68 | 3180 | 1 | 50.16  |
| 544 | 1_WT.nd2 | 5 | 69 | 3191 | 1 | 26.02  |
| 545 | 1_WT.nd2 | 5 | 70 | 2307 | 1 | 213.35 |
| 546 | 1_WT.nd2 | 5 | 71 | 3230 | 1 | 76.3   |
| 547 | 1_WT.nd2 | 5 | 72 | 3462 | 1 | 71.01  |
| 548 | 1_WT.nd2 | 5 | 73 | 2309 | 1 | 65.15  |
| 549 | 1_WT.nd2 | 5 | 74 | 2617 | 1 | 111.63 |
| 550 | 1_WT.nd2 | 5 | 75 | 5175 | 2 | 94.02  |
| 551 | 1_WT.nd2 | 5 | 76 | 4490 | 2 | 41.34  |
| 552 | 1_WT.nd2 | 5 | 77 | 2807 | 1 | 18.79  |
| 553 | 1_WT.nd2 | 5 | 78 | 3199 | 1 | 84.1   |
| 554 | 1_WT.nd2 | 5 | 79 | 2424 | 1 | 206.63 |
| 555 | 1_WT.nd2 | 5 | 80 | 2724 | 1 | 121.17 |

|     |          |   |     |      |   |        |
|-----|----------|---|-----|------|---|--------|
| 556 | 1_WT.nd2 | 5 | 81  | 3081 | 1 | 16.28  |
| 557 | 1_WT.nd2 | 5 | 82  | 3324 | 1 | 34.44  |
| 558 | 1_WT.nd2 | 5 | 83  | 2686 | 1 | 101.36 |
| 559 | 1_WT.nd2 | 5 | 84  | 3597 | 1 | 33.3   |
| 560 | 1_WT.nd2 | 5 | 85  | 2744 | 1 | 28.28  |
| 561 | 1_WT.nd2 | 5 | 86  | 2958 | 1 | 99.16  |
| 562 | 1_WT.nd2 | 5 | 87  | 3321 | 1 | 45.49  |
| 563 | 1_WT.nd2 | 5 | 88  | 2822 | 1 | 72     |
| 564 | 1_WT.nd2 | 5 | 89  | 2319 | 1 | 41.01  |
| 565 | 1_WT.nd2 | 5 | 90  | 2629 | 1 | 34.21  |
| 566 | 1_WT.nd2 | 5 | 91  | 2659 | 1 | 27.89  |
| 567 | 1_WT.nd2 | 5 | 92  | 2545 | 1 | 113.84 |
| 568 | 1_WT.nd2 | 5 | 93  | 3027 | 1 | 127.48 |
| 569 | 1_WT.nd2 | 5 | 94  | 2409 | 1 | 53.67  |
| 570 | 1_WT.nd2 | 5 | 95  | 3918 | 1 | 80.28  |
| 571 | 1_WT.nd2 | 5 | 96  | 3384 | 1 | 51.24  |
| 572 | 1_WT.nd2 | 5 | 97  | 2999 | 1 | 49     |
| 573 | 1_WT.nd2 | 5 | 98  | 3349 | 1 | 43     |
| 574 | 1_WT.nd2 | 5 | 99  | 2968 | 1 | 93.43  |
| 575 | 1_WT.nd2 | 5 | 100 | 4186 | 1 | 79.2   |
| 576 | 1_WT.nd2 | 5 | 101 | 4923 | 2 | 43.86  |
| 577 | 1_WT.nd2 | 5 | 102 | 2819 | 1 | 49.52  |
| 578 | 1_WT.nd2 | 5 | 103 | 3182 | 1 | 41.05  |
| 579 | 1_WT.nd2 | 5 | 104 | 3615 | 1 | 36.22  |
| 580 | 1_WT.nd2 | 5 | 105 | 2501 | 1 | 65     |
| 581 | 1_WT.nd2 | 5 | 106 | 3264 | 1 | 175.55 |
| 582 | 1_WT.nd2 | 5 | 107 | 5865 | 2 | 37.22  |
| 583 | 1_WT.nd2 | 5 | 108 | 2699 | 1 | 123.22 |
| 584 | 1_WT.nd2 | 5 | 109 | 3527 | 1 | 34.83  |
| 585 | 1_WT.nd2 | 5 | 110 | 2979 | 1 | 178    |
| 586 | 1_WT.nd2 | 5 | 111 | 6648 | 2 | 25.63  |
| 587 | 1_WT.nd2 | 5 | 112 | 5156 | 2 | 176.71 |
| 588 | 1_WT.nd2 | 5 | 113 | 4695 | 2 | 79.06  |
| 589 | 1_WT.nd2 | 5 | 114 | 5776 | 2 | 21.95  |
| 590 | 1_WT.nd2 | 5 | 115 | 2824 | 1 | 144.4  |
| 591 | 1_WT.nd2 | 5 | 116 | 4699 | 2 | 19.85  |
| 592 | 1_WT.nd2 | 5 | 117 | 3084 | 1 | 32.2   |
| 593 | 1_WT.nd2 | 5 | 118 | 4380 | 2 | 177.87 |
| 594 | 1_WT.nd2 | 5 | 119 | 3660 | 1 | 97.5   |
| 595 | 1_WT.nd2 | 5 | 120 | 2910 | 1 | 35.36  |
| 596 | 1_WT.nd2 | 5 | 121 | 5829 | 2 | 19.1   |
| 597 | 1_WT.nd2 | 5 | 122 | 3257 | 1 | 191    |
| 598 | 1_WT.nd2 | 5 | 123 | 3145 | 1 | 185.22 |

|     |          |   |     |      |   |        |
|-----|----------|---|-----|------|---|--------|
| 599 | 1_WT.nd2 | 5 | 124 | 2817 | 1 | 91     |
| 600 | 1_WT.nd2 | 5 | 125 | 3495 | 1 | 3      |
| 601 | 1_WT.nd2 | 5 | 126 | 3069 | 1 | 162.41 |
| 602 | 1_WT.nd2 | 5 | 127 | 3255 | 1 | 19.31  |
| 603 | 1_WT.nd2 | 5 | 128 | 6590 | 2 | 29.83  |
| 604 | 1_WT.nd2 | 5 | 129 | 2542 | 1 | 215    |
| 605 | 1_WT.nd2 | 5 | 130 | 3338 | 1 | 97     |
| 606 | 1_WT.nd2 | 5 | 131 | 3684 | 1 | 175.51 |
| 607 | 1_WT.nd2 | 5 | 132 | 7375 | 3 | 29     |
| 608 | 1_WT.nd2 | 5 | 133 | 3045 | 1 | 64.94  |
| 609 | 1_WT.nd2 | 5 | 134 | 4515 | 2 | 181.65 |
| 610 | 1_WT.nd2 | 5 | 135 | 4541 | 2 | 58.69  |
| 611 | 1_WT.nd2 | 5 | 136 | 4026 | 1 | 45     |
| 612 | 1_WT.nd2 | 5 | 137 | 5385 | 2 | 55     |
| 613 | 1_WT.nd2 | 5 | 138 | 4800 | 2 | 181.6  |
| 614 | 1_WT.nd2 | 5 | 139 | 3241 | 1 | 169.52 |
| 615 | 1_WT.nd2 | 5 | 140 | 4869 | 2 | 65     |
| 616 | 1_WT.nd2 | 5 | 141 | 4415 | 2 | 65     |
| 617 | 1_WT.nd2 | 5 | 142 | 4073 | 1 | 180.27 |
| 618 | 1_WT.nd2 | 5 | 143 | 3938 | 1 | 54.08  |
| 619 | 1_WT.nd2 | 5 | 144 | 2489 | 1 | 113    |
| 620 | 1_WT.nd2 | 5 | 145 | 3802 | 1 | 169.26 |
| 621 | 1_WT.nd2 | 5 | 146 | 2612 | 1 | 122.58 |
| 622 | 1_WT.nd2 | 5 | 147 | 4009 | 1 | 123.47 |
| 623 | 1_WT.nd2 | 5 | 148 | 3086 | 1 | 224.66 |
| 624 | 1_WT.nd2 | 5 | 149 | 6855 | 2 | 162.31 |
| 625 | 1_WT.nd2 | 5 | 150 | 4952 | 2 | 169.19 |
| 626 | 1_WT.nd2 | 5 | 151 | 2948 | 1 | 76.69  |
| 627 | 1_WT.nd2 | 5 | 152 | 4848 | 2 | 83.49  |
| 628 | 1_WT.nd2 | 5 | 153 | 5330 | 2 | 154.03 |
| 629 | 1_WT.nd2 | 5 | 154 | 6093 | 2 | 164.81 |
| 630 | 1_WT.nd2 | 5 | 155 | 2363 | 1 | 138.36 |
| 631 | 1_WT.nd2 | 5 | 156 | 5183 | 2 | 153.57 |
| 632 | 1_WT.nd2 | 5 | 157 | 2827 | 1 | 157.69 |
| 633 | 1_WT.nd2 | 5 | 158 | 3300 | 1 | 41     |
| 634 | 1_WT.nd2 | 5 | 159 | 3652 | 1 | 138.08 |
| 635 | 1_WT.nd2 | 5 | 160 | 2352 | 1 | 187.56 |
| 636 | 1_WT.nd2 | 5 | 161 | 3833 | 1 | 131.75 |
| 637 | 1_WT.nd2 | 5 | 162 | 3134 | 1 | 171.99 |
| 638 | 1_WT.nd2 | 5 | 163 | 3240 | 1 | 204.27 |
| 639 | 1_WT.nd2 | 5 | 164 | 6104 | 2 | 167.19 |
| 640 | 1_WT.nd2 | 5 | 165 | 2859 | 1 | 201.3  |
| 641 | 1_WT.nd2 | 5 | 166 | 3142 | 1 | 33.02  |

|     |          |   |     |      |   |        |
|-----|----------|---|-----|------|---|--------|
| 642 | 1_WT.nd2 | 5 | 167 | 5664 | 2 | 65.01  |
| 643 | 1_WT.nd2 | 5 | 168 | 2437 | 1 | 264.2  |
| 644 | 1_WT.nd2 | 5 | 169 | 3151 | 1 | 160    |
| 645 | 1_WT.nd2 | 5 | 170 | 2796 | 1 | 94     |
| 646 | 1_WT.nd2 | 5 | 171 | 2627 | 1 | 73.01  |
| 647 | 1_WT.nd2 | 5 | 172 | 2609 | 1 | 261.28 |
| 648 | 1_WT.nd2 | 5 | 173 | 2662 | 1 | 108.45 |
| 649 | 1_WT.nd2 | 5 | 174 | 2880 | 1 | 151.08 |
| 650 | 1_WT.nd2 | 5 | 175 | 2795 | 1 | 39.6   |
| 651 | 1_WT.nd2 | 5 | 176 | 2853 | 1 | 59.41  |
| 652 | 1_WT.nd2 | 5 | 177 | 7440 | 3 | 155.5  |
| 653 | 1_WT.nd2 | 5 | 178 | 5935 | 2 | 145.5  |
| 654 | 1_WT.nd2 | 5 | 179 | 4892 | 2 | 86.95  |
| 655 | 1_WT.nd2 | 5 | 180 | 2698 | 1 | 97.95  |
| 656 | 1_WT.nd2 | 5 | 181 | 3369 | 1 | 136.96 |
| 657 | 1_WT.nd2 | 5 | 182 | 3303 | 1 | 135.77 |
| 658 | 1_WT.nd2 | 5 | 183 | 3548 | 1 | 128.55 |
| 659 | 1_WT.nd2 | 5 | 184 | 4707 | 2 | 96.21  |
| 660 | 1_WT.nd2 | 5 | 185 | 3889 | 1 | 126.12 |
| 661 | 1_WT.nd2 | 5 | 186 | 4498 | 2 | 107.62 |
| 662 | 1_WT.nd2 | 5 | 187 | 4073 | 1 | 123.94 |
| 663 | 1_WT.nd2 | 5 | 188 | 2744 | 1 | 290.66 |
| 664 | 1_WT.nd2 | 5 | 189 | 2534 | 1 | 231.62 |
| 665 | 1_WT.nd2 | 5 | 190 | 2787 | 1 | 291.45 |
| 666 | 1_WT.nd2 | 5 | 191 | 3648 | 1 | 225.4  |
| 667 | 1_WT.nd2 | 5 | 192 | 2692 | 1 | 242.67 |
| 668 | 1_WT.nd2 | 5 | 193 | 3521 | 1 | 272.61 |
| 669 | 1_WT.nd2 | 5 | 194 | 4016 | 1 | 281.3  |
| 670 | 1_WT.nd2 | 5 | 195 | 2405 | 1 | 316.1  |
| 671 | 1_WT.nd2 | 5 | 196 | 2943 | 1 | 256.26 |
| 672 | 1_WT.nd2 | 5 | 197 | 3292 | 1 | 273.21 |
| 673 | 1_WT.nd2 | 5 | 198 | 3192 | 1 | 263.23 |
| 674 | 1_WT.nd2 | 5 | 199 | 3271 | 1 | 267.64 |
| 675 | 1_WT.nd2 | 5 | 200 | 3271 | 1 | 271.58 |
| 676 | 1_WT.nd2 | 5 | 201 | 4795 | 2 | 284.71 |
| 677 | 1_WT.nd2 | 5 | 202 | 3706 | 1 | 272.09 |
| 678 | 1_WT.nd2 | 5 | 203 | 3595 | 1 | 273.75 |
| 679 | 1_WT.nd2 | 5 | 204 | 3336 | 1 | 276.66 |
| 680 | 1_WT.nd2 | 5 | 205 | 2852 | 1 | 299.01 |
| 681 | 1_WT.nd2 | 5 | 206 | 3317 | 1 | 365.33 |
| 682 | 1_WT.nd2 | 5 | 207 | 2860 | 1 | 315.49 |
| 683 | 1_WT.nd2 | 5 | 208 | 4524 | 2 | 316.1  |
| 684 | 1_WT.nd2 | 6 | 1   | 2657 | 1 | 151.48 |

|     |          |   |    |      |   |        |
|-----|----------|---|----|------|---|--------|
| 685 | 1_WT.nd2 | 6 | 2  | 2872 | 1 | 0      |
| 686 | 1_WT.nd2 | 6 | 3  | 3366 | 1 | 0      |
| 687 | 1_WT.nd2 | 6 | 4  | 2892 | 1 | 42     |
| 688 | 1_WT.nd2 | 6 | 5  | 2794 | 1 | 0      |
| 689 | 1_WT.nd2 | 6 | 6  | 2466 | 1 | 54     |
| 690 | 1_WT.nd2 | 6 | 7  | 3918 | 1 | 42.01  |
| 691 | 1_WT.nd2 | 6 | 8  | 4667 | 2 | 18.68  |
| 692 | 1_WT.nd2 | 6 | 9  | 4076 | 1 | 30.53  |
| 693 | 1_WT.nd2 | 6 | 10 | 3976 | 1 | 17     |
| 694 | 1_WT.nd2 | 6 | 11 | 2619 | 1 | 8.54   |
| 695 | 1_WT.nd2 | 6 | 12 | 2733 | 1 | 0      |
| 696 | 1_WT.nd2 | 6 | 13 | 3107 | 1 | 14.87  |
| 697 | 1_WT.nd2 | 6 | 14 | 3384 | 1 | 13.6   |
| 698 | 1_WT.nd2 | 6 | 15 | 3224 | 1 | 24.6   |
| 699 | 1_WT.nd2 | 6 | 16 | 3848 | 1 | 13.15  |
| 700 | 1_WT.nd2 | 6 | 17 | 2881 | 1 | 19.85  |
| 701 | 1_WT.nd2 | 6 | 18 | 3051 | 1 | 33.24  |
| 702 | 1_WT.nd2 | 6 | 19 | 2492 | 1 | 36.07  |
| 703 | 1_WT.nd2 | 6 | 20 | 2489 | 1 | 0      |
| 704 | 1_WT.nd2 | 6 | 21 | 3945 | 1 | 23     |
| 705 | 1_WT.nd2 | 6 | 22 | 3835 | 1 | 23.19  |
| 706 | 1_WT.nd2 | 6 | 23 | 3459 | 1 | 30.15  |
| 707 | 1_WT.nd2 | 6 | 24 | 3030 | 1 | 34.93  |
| 708 | 1_WT.nd2 | 6 | 25 | 3445 | 1 | 54.45  |
| 709 | 1_WT.nd2 | 6 | 26 | 4365 | 2 | 66     |
| 710 | 1_WT.nd2 | 6 | 27 | 2560 | 1 | 92.4   |
| 711 | 1_WT.nd2 | 6 | 28 | 3834 | 1 | 41.59  |
| 712 | 1_WT.nd2 | 6 | 29 | 3628 | 1 | 48.38  |
| 713 | 1_WT.nd2 | 6 | 30 | 2657 | 1 | 72.37  |
| 714 | 1_WT.nd2 | 6 | 31 | 3682 | 1 | 33.3   |
| 715 | 1_WT.nd2 | 6 | 32 | 2667 | 1 | 105.23 |
| 716 | 1_WT.nd2 | 6 | 33 | 4076 | 1 | 26.87  |
| 717 | 1_WT.nd2 | 6 | 34 | 4987 | 2 | 19.72  |
| 718 | 1_WT.nd2 | 6 | 35 | 3693 | 1 | 92.14  |
| 719 | 1_WT.nd2 | 6 | 36 | 5310 | 2 | 12.04  |
| 720 | 1_WT.nd2 | 6 | 37 | 4265 | 2 | 4.47   |
| 721 | 1_WT.nd2 | 6 | 38 | 2527 | 1 | 47     |
| 722 | 1_WT.nd2 | 6 | 39 | 5048 | 2 | 0      |
| 723 | 1_WT.nd2 | 6 | 40 | 5365 | 2 | 1      |
| 724 | 1_WT.nd2 | 6 | 41 | 5444 | 2 | 4.24   |
| 725 | 1_WT.nd2 | 6 | 42 | 2435 | 1 | 93.26  |
| 726 | 1_WT.nd2 | 6 | 43 | 2449 | 1 | 129.34 |
| 727 | 1_WT.nd2 | 6 | 44 | 3416 | 1 | 3      |

|     |          |   |    |      |   |        |
|-----|----------|---|----|------|---|--------|
| 728 | 1_WT.nd2 | 6 | 45 | 4746 | 2 | 8.06   |
| 729 | 1_WT.nd2 | 6 | 46 | 4559 | 2 | 1.41   |
| 730 | 1_WT.nd2 | 6 | 47 | 3586 | 1 | 9.85   |
| 731 | 1_WT.nd2 | 6 | 48 | 3460 | 1 | 162.05 |
| 732 | 1_WT.nd2 | 6 | 49 | 4086 | 1 | 8.06   |
| 733 | 1_WT.nd2 | 6 | 50 | 3881 | 1 | 19.1   |
| 734 | 1_WT.nd2 | 6 | 51 | 3465 | 1 | 17     |
| 735 | 1_WT.nd2 | 6 | 52 | 3387 | 1 | 22.47  |
| 736 | 1_WT.nd2 | 6 | 53 | 5768 | 2 | 30.02  |
| 737 | 1_WT.nd2 | 6 | 54 | 4179 | 1 | 38.9   |
| 738 | 1_WT.nd2 | 6 | 55 | 6405 | 2 | 49     |
| 739 | 1_WT.nd2 | 6 | 56 | 5198 | 2 | 57     |
| 740 | 1_WT.nd2 | 6 | 57 | 2870 | 1 | 62.01  |
| 741 | 1_WT.nd2 | 6 | 58 | 2789 | 1 | 68.07  |
| 742 | 1_WT.nd2 | 6 | 59 | 3156 | 1 | 120    |
| 743 | 1_WT.nd2 | 6 | 60 | 2480 | 1 | 198.57 |
| 744 | 1_WT.nd2 | 6 | 61 | 3310 | 1 | 97.05  |
| 745 | 1_WT.nd2 | 6 | 62 | 2671 | 1 | 33.24  |
| 746 | 1_WT.nd2 | 6 | 63 | 2501 | 1 | 44.41  |
| 747 | 1_WT.nd2 | 6 | 64 | 2760 | 1 | 195.23 |
| 748 | 1_WT.nd2 | 6 | 65 | 2517 | 1 | 91.97  |
| 749 | 1_WT.nd2 | 6 | 66 | 2753 | 1 | 145.6  |
| 750 | 1_WT.nd2 | 6 | 67 | 2390 | 1 | 40.01  |
| 751 | 1_WT.nd2 | 6 | 68 | 2811 | 1 | 52.89  |
| 752 | 1_WT.nd2 | 6 | 69 | 4696 | 2 | 43.05  |
| 753 | 1_WT.nd2 | 6 | 70 | 2756 | 1 | 89.27  |
| 754 | 1_WT.nd2 | 6 | 71 | 2631 | 1 | 79.2   |
| 755 | 1_WT.nd2 | 6 | 72 | 3671 | 1 | 43.42  |
| 756 | 1_WT.nd2 | 6 | 73 | 3459 | 1 | 175.7  |
| 757 | 1_WT.nd2 | 6 | 74 | 3815 | 1 | 33.38  |
| 758 | 1_WT.nd2 | 6 | 75 | 6198 | 2 | 27.51  |
| 759 | 1_WT.nd2 | 6 | 76 | 6918 | 2 | 24.7   |
| 760 | 1_WT.nd2 | 6 | 77 | 3631 | 1 | 177.79 |
| 761 | 1_WT.nd2 | 6 | 78 | 5128 | 2 | 22.02  |
| 762 | 1_WT.nd2 | 6 | 79 | 2707 | 1 | 62.1   |
| 763 | 1_WT.nd2 | 6 | 80 | 5739 | 2 | 19.8   |
| 764 | 1_WT.nd2 | 6 | 81 | 3812 | 1 | 11     |
| 765 | 1_WT.nd2 | 6 | 82 | 4275 | 2 | 178.73 |
| 766 | 1_WT.nd2 | 6 | 83 | 3916 | 1 | 91     |
| 767 | 1_WT.nd2 | 6 | 84 | 3044 | 1 | 5      |
| 768 | 1_WT.nd2 | 6 | 85 | 3526 | 1 | 32.7   |
| 769 | 1_WT.nd2 | 6 | 86 | 3083 | 1 | 20.62  |
| 770 | 1_WT.nd2 | 6 | 87 | 4508 | 2 | 179.49 |

|     |          |   |     |      |   |        |
|-----|----------|---|-----|------|---|--------|
| 771 | 1_WT.nd2 | 6 | 88  | 7583 | 3 | 30     |
| 772 | 1_WT.nd2 | 6 | 89  | 2684 | 1 | 66.29  |
| 773 | 1_WT.nd2 | 6 | 90  | 3025 | 1 | 60.21  |
| 774 | 1_WT.nd2 | 6 | 91  | 4011 | 1 | 23.09  |
| 775 | 1_WT.nd2 | 6 | 92  | 3057 | 1 | 49.65  |
| 776 | 1_WT.nd2 | 6 | 93  | 4856 | 2 | 175.76 |
| 777 | 1_WT.nd2 | 6 | 94  | 3382 | 1 | 43     |
| 778 | 1_WT.nd2 | 6 | 95  | 5367 | 2 | 177.56 |
| 779 | 1_WT.nd2 | 6 | 96  | 3263 | 1 | 86.31  |
| 780 | 1_WT.nd2 | 6 | 97  | 5639 | 2 | 59     |
| 781 | 1_WT.nd2 | 6 | 98  | 2917 | 1 | 113    |
| 782 | 1_WT.nd2 | 6 | 99  | 3056 | 1 | 169.78 |
| 783 | 1_WT.nd2 | 6 | 100 | 2864 | 1 | 48.26  |
| 784 | 1_WT.nd2 | 6 | 101 | 2604 | 1 | 117.61 |
| 785 | 1_WT.nd2 | 6 | 102 | 2803 | 1 | 59.68  |
| 786 | 1_WT.nd2 | 6 | 103 | 5646 | 2 | 162.12 |
| 787 | 1_WT.nd2 | 6 | 104 | 4127 | 1 | 82.93  |
| 788 | 1_WT.nd2 | 6 | 105 | 5329 | 2 | 156.85 |
| 789 | 1_WT.nd2 | 6 | 106 | 6297 | 2 | 163.53 |
| 790 | 1_WT.nd2 | 6 | 107 | 2344 | 1 | 138.36 |
| 791 | 1_WT.nd2 | 6 | 108 | 3743 | 1 | 154.28 |
| 792 | 1_WT.nd2 | 6 | 109 | 3024 | 1 | 153.76 |
| 793 | 1_WT.nd2 | 6 | 110 | 2956 | 1 | 163.59 |
| 794 | 1_WT.nd2 | 6 | 111 | 2802 | 1 | 63.03  |
| 795 | 1_WT.nd2 | 6 | 112 | 3258 | 1 | 79     |
| 796 | 1_WT.nd2 | 6 | 113 | 2847 | 1 | 67.45  |
| 797 | 1_WT.nd2 | 6 | 114 | 2862 | 1 | 68.45  |
| 798 | 1_WT.nd2 | 6 | 115 | 2637 | 1 | 63.29  |
| 799 | 1_WT.nd2 | 6 | 116 | 2587 | 1 | 107.52 |
| 800 | 1_WT.nd2 | 6 | 117 | 4457 | 2 | 156.73 |
| 801 | 1_WT.nd2 | 6 | 118 | 2944 | 1 | 146.75 |
| 802 | 1_WT.nd2 | 6 | 119 | 3032 | 1 | 86.61  |
| 803 | 1_WT.nd2 | 6 | 120 | 4573 | 2 | 143.89 |
| 804 | 1_WT.nd2 | 6 | 121 | 2845 | 1 | 45.01  |
| 805 | 1_WT.nd2 | 6 | 122 | 4969 | 2 | 136.12 |
| 806 | 1_WT.nd2 | 6 | 123 | 4315 | 2 | 133.15 |
| 807 | 1_WT.nd2 | 6 | 124 | 3936 | 1 | 54.59  |
| 808 | 1_WT.nd2 | 6 | 125 | 6057 | 2 | 129.87 |
| 809 | 1_WT.nd2 | 6 | 126 | 2493 | 1 | 140.63 |
| 810 | 1_WT.nd2 | 6 | 127 | 3942 | 1 | 122.98 |
| 811 | 1_WT.nd2 | 6 | 128 | 2830 | 1 | 118.7  |
| 812 | 1_WT.nd2 | 6 | 129 | 4532 | 2 | 135.07 |
| 813 | 1_WT.nd2 | 6 | 130 | 3840 | 1 | 131.23 |

|     |          |   |     |       |    |        |
|-----|----------|---|-----|-------|----|--------|
| 814 | 1_WT.nd2 | 6 | 131 | 3660  | 1  | 2      |
| 815 | 1_WT.nd2 | 6 | 132 | 3192  | 1  | 136.21 |
| 816 | 1_WT.nd2 | 6 | 133 | 2995  | 1  | 79     |
| 817 | 1_WT.nd2 | 6 | 134 | 2927  | 1  | 30.81  |
| 818 | 1_WT.nd2 | 6 | 135 | 2577  | 1  | 124.92 |
| 819 | 1_WT.nd2 | 6 | 136 | 2740  | 1  | 44.42  |
| 820 | 1_WT.nd2 | 6 | 137 | 3167  | 1  | 70.43  |
| 821 | 1_WT.nd2 | 6 | 138 | 3146  | 1  | 82.88  |
| 822 | 1_WT.nd2 | 6 | 139 | 2403  | 1  | 72.14  |
| 823 | 1_WT.nd2 | 6 | 140 | 4290  | 2  | 72.86  |
| 824 | 1_WT.nd2 | 6 | 141 | 3524  | 1  | 91.22  |
| 825 | 1_WT.nd2 | 6 | 142 | 3153  | 1  | 99.36  |
| 826 | 1_WT.nd2 | 6 | 143 | 2310  | 1  | 166.01 |
| 827 | 1_WT.nd2 | 6 | 144 | 3982  | 1  | 105.89 |
| 828 | 1_WT.nd2 | 6 | 145 | 3355  | 1  | 81.99  |
| 829 | 1_WT.nd2 | 6 | 146 | 3025  | 1  | 80.08  |
| 830 | 1_WT.nd2 | 6 | 147 | 3268  | 1  | 168.05 |
| 831 | 1_WT.nd2 | 7 | 1   | 2796  | 1  | 60     |
| 832 | 1_WT.nd2 | 7 | 2   | 3059  | 1  | 9      |
| 833 | 1_WT.nd2 | 7 | 3   | 3256  | 1  | 0      |
| 834 | 1_WT.nd2 | 7 | 4   | 3800  | 1  | 23.35  |
| 835 | 1_WT.nd2 | 7 | 5   | 2736  | 1  | 1.41   |
| 836 | 1_WT.nd2 | 7 | 6   | 2636  | 1  | 14.87  |
| 837 | 1_WT.nd2 | 7 | 7   | 2509  | 1  | 25.5   |
| 838 | 1_WT.nd2 | 7 | 8   | 3704  | 1  | 58.31  |
| 839 | 1_WT.nd2 | 7 | 9   | 2917  | 1  | 72.2   |
| 840 | 1_WT.nd2 | 7 | 10  | 2726  | 1  | 79.31  |
| 841 | 1_WT.nd2 | 7 | 11  | 2738  | 1  | 21.47  |
| 842 | 1_WT.nd2 | 7 | 12  | 2759  | 1  | 89.87  |
| 843 | 1_WT.nd2 | 7 | 13  | 2411  | 1  | 75.01  |
| 844 | 1_WT.nd2 | 7 | 14  | 2662  | 1  | 77.41  |
| 845 | 1_WT.nd2 | 7 | 15  | 2541  | 1  | 82.33  |
| 846 | 1_WT.nd2 | 7 | 16  | 4299  | 2  | 51.66  |
| 847 | 1_WT.nd2 | 7 | 17  | 3614  | 1  | 44.69  |
| 848 | 1_WT.nd2 | 7 | 18  | 3861  | 1  | 33.6   |
| 849 | 1_WT.nd2 | 7 | 19  | 62690 | 22 | 25.81  |
| 850 | 1_WT.nd2 | 7 | 20  | 3552  | 1  | 14.32  |
| 851 | 1_WT.nd2 | 7 | 21  | 3708  | 1  | 8      |
| 852 | 1_WT.nd2 | 7 | 22  | 3689  | 1  | 9.49   |
| 853 | 1_WT.nd2 | 7 | 23  | 4039  | 1  | 2.24   |
| 854 | 1_WT.nd2 | 7 | 24  | 4248  | 2  | 4      |
| 855 | 1_WT.nd2 | 7 | 25  | 3877  | 1  | 0      |
| 856 | 1_WT.nd2 | 7 | 26  | 4771  | 2  | 9      |



|     |          |   |    |      |   |        |
|-----|----------|---|----|------|---|--------|
| 857 | 1_WT.nd2 | 7 | 27 | 5004 | 2 | 11.7   |
| 858 | 1_WT.nd2 | 7 | 28 | 3629 | 1 | 23     |
| 859 | 1_WT.nd2 | 7 | 29 | 4204 | 1 | 0      |
| 860 | 1_WT.nd2 | 7 | 30 | 3228 | 1 | 0      |
| 861 | 1_WT.nd2 | 7 | 31 | 3568 | 1 | 9.22   |
| 862 | 1_WT.nd2 | 7 | 32 | 4944 | 2 | 36     |
| 863 | 1_WT.nd2 | 7 | 33 | 4789 | 2 | 27.86  |
| 864 | 1_WT.nd2 | 7 | 34 | 3818 | 1 | 16.16  |
| 865 | 1_WT.nd2 | 7 | 35 | 3052 | 1 | 3      |
| 866 | 1_WT.nd2 | 7 | 36 | 3897 | 1 | 16.28  |
| 867 | 1_WT.nd2 | 7 | 37 | 2620 | 1 | 9      |
| 868 | 1_WT.nd2 | 7 | 38 | 4574 | 2 | 43.68  |
| 869 | 1_WT.nd2 | 7 | 39 | 3424 | 1 | 24.76  |
| 870 | 1_WT.nd2 | 7 | 40 | 4192 | 1 | 13.45  |
| 871 | 1_WT.nd2 | 7 | 41 | 3617 | 1 | 5      |
| 872 | 1_WT.nd2 | 7 | 42 | 4086 | 1 | 31.83  |
| 873 | 1_WT.nd2 | 7 | 43 | 2875 | 1 | 57.31  |
| 874 | 1_WT.nd2 | 7 | 44 | 2393 | 1 | 0      |
| 875 | 1_WT.nd2 | 7 | 45 | 3634 | 1 | 37.2   |
| 876 | 1_WT.nd2 | 7 | 46 | 4647 | 2 | 7.28   |
| 877 | 1_WT.nd2 | 7 | 47 | 2968 | 1 | 61     |
| 878 | 1_WT.nd2 | 7 | 48 | 4517 | 2 | 8      |
| 879 | 1_WT.nd2 | 7 | 49 | 4863 | 2 | 43.42  |
| 880 | 1_WT.nd2 | 7 | 50 | 4753 | 2 | 0      |
| 881 | 1_WT.nd2 | 7 | 51 | 4751 | 2 | 5.1    |
| 882 | 1_WT.nd2 | 7 | 52 | 6934 | 2 | 7.81   |
| 883 | 1_WT.nd2 | 7 | 53 | 3856 | 1 | 58.69  |
| 884 | 1_WT.nd2 | 7 | 54 | 5817 | 2 | 12.81  |
| 885 | 1_WT.nd2 | 7 | 55 | 5087 | 2 | 21.95  |
| 886 | 1_WT.nd2 | 7 | 56 | 3707 | 1 | 66.37  |
| 887 | 1_WT.nd2 | 7 | 57 | 3214 | 1 | 37.8   |
| 888 | 1_WT.nd2 | 7 | 58 | 2910 | 1 | 81.84  |
| 889 | 1_WT.nd2 | 7 | 59 | 3372 | 1 | 29.41  |
| 890 | 1_WT.nd2 | 7 | 60 | 3186 | 1 | 71.17  |
| 891 | 1_WT.nd2 | 7 | 61 | 3103 | 1 | 41.63  |
| 892 | 1_WT.nd2 | 7 | 62 | 3724 | 1 | 88.6   |
| 893 | 1_WT.nd2 | 7 | 63 | 2827 | 1 | 94.01  |
| 894 | 1_WT.nd2 | 7 | 64 | 3383 | 1 | 102.62 |
| 895 | 1_WT.nd2 | 7 | 65 | 2506 | 1 | 96.25  |
| 896 | 1_WT.nd2 | 7 | 66 | 2551 | 1 | 48.3   |
| 897 | 1_WT.nd2 | 7 | 67 | 3181 | 1 | 84     |
| 898 | 1_WT.nd2 | 7 | 68 | 3385 | 1 | 31.38  |
| 899 | 1_WT.nd2 | 7 | 69 | 3027 | 1 | 29.02  |

|     |          |   |     |      |   |        |
|-----|----------|---|-----|------|---|--------|
| 900 | 1_WT.nd2 | 7 | 70  | 3046 | 1 | 38.18  |
| 901 | 1_WT.nd2 | 7 | 71  | 6819 | 2 | 27     |
| 902 | 1_WT.nd2 | 7 | 72  | 3536 | 1 | 67.12  |
| 903 | 1_WT.nd2 | 7 | 73  | 4275 | 2 | 16.16  |
| 904 | 1_WT.nd2 | 7 | 74  | 3216 | 1 | 20.62  |
| 905 | 1_WT.nd2 | 7 | 75  | 5768 | 2 | 15     |
| 906 | 1_WT.nd2 | 7 | 76  | 6925 | 2 | 8.25   |
| 907 | 1_WT.nd2 | 7 | 77  | 5741 | 2 | 4.24   |
| 908 | 1_WT.nd2 | 7 | 78  | 4405 | 2 | 9.9    |
| 909 | 1_WT.nd2 | 7 | 79  | 2976 | 1 | 8.6    |
| 910 | 1_WT.nd2 | 7 | 80  | 5717 | 2 | 6.4    |
| 911 | 1_WT.nd2 | 7 | 81  | 6748 | 2 | 2.24   |
| 912 | 1_WT.nd2 | 7 | 82  | 4923 | 2 | 0      |
| 913 | 1_WT.nd2 | 7 | 83  | 4445 | 2 | 4      |
| 914 | 1_WT.nd2 | 7 | 84  | 5332 | 2 | 1      |
| 915 | 1_WT.nd2 | 7 | 85  | 5154 | 2 | 3      |
| 916 | 1_WT.nd2 | 7 | 86  | 3936 | 1 | 18.25  |
| 917 | 1_WT.nd2 | 7 | 87  | 3617 | 1 | 8      |
| 918 | 1_WT.nd2 | 7 | 88  | 5171 | 2 | 12     |
| 919 | 1_WT.nd2 | 7 | 89  | 4258 | 2 | 25.02  |
| 920 | 1_WT.nd2 | 7 | 90  | 5036 | 2 | 0      |
| 921 | 1_WT.nd2 | 7 | 91  | 5513 | 2 | 7      |
| 922 | 1_WT.nd2 | 7 | 92  | 5024 | 2 | 4.47   |
| 923 | 1_WT.nd2 | 7 | 93  | 3638 | 1 | 13.6   |
| 924 | 1_WT.nd2 | 7 | 94  | 4125 | 1 | 20.22  |
| 925 | 1_WT.nd2 | 7 | 95  | 3166 | 1 | 47.1   |
| 926 | 1_WT.nd2 | 7 | 96  | 5868 | 2 | 1      |
| 927 | 1_WT.nd2 | 7 | 97  | 7508 | 3 | 25.3   |
| 928 | 1_WT.nd2 | 7 | 98  | 4889 | 2 | 10.63  |
| 929 | 1_WT.nd2 | 7 | 99  | 3745 | 1 | 18.87  |
| 930 | 1_WT.nd2 | 7 | 100 | 6735 | 2 | 17.8   |
| 931 | 1_WT.nd2 | 7 | 101 | 3233 | 1 | 29.41  |
| 932 | 1_WT.nd2 | 7 | 102 | 4711 | 2 | 24.21  |
| 933 | 1_WT.nd2 | 7 | 103 | 4017 | 1 | 16.4   |
| 934 | 1_WT.nd2 | 7 | 104 | 5775 | 2 | 23.35  |
| 935 | 1_WT.nd2 | 7 | 105 | 5123 | 2 | 24.04  |
| 936 | 1_WT.nd2 | 7 | 106 | 3749 | 1 | 27.59  |
| 937 | 1_WT.nd2 | 7 | 107 | 5999 | 2 | 24.17  |
| 938 | 1_WT.nd2 | 7 | 108 | 3099 | 1 | 48.02  |
| 939 | 1_WT.nd2 | 7 | 109 | 5801 | 2 | 24.74  |
| 940 | 1_WT.nd2 | 7 | 110 | 3652 | 1 | 33.24  |
| 941 | 1_WT.nd2 | 7 | 111 | 2435 | 1 | 380.42 |
| 942 | 1_WT.nd2 | 7 | 112 | 4266 | 2 | 398.93 |

|     |          |   |     |      |   |        |
|-----|----------|---|-----|------|---|--------|
| 943 | 1_WT.nd2 | 7 | 113 | 3592 | 1 | 413.88 |
| 944 | 1_WT.nd2 | 7 | 114 | 3768 | 1 | 422.89 |
| 945 | 1_WT.nd2 | 7 | 115 | 3199 | 1 | 428.52 |
| 946 | 1_WT.nd2 | 7 | 116 | 2484 | 1 | 373.4  |
| 947 | 1_WT.nd2 | 7 | 117 | 3830 | 1 | 424.97 |
| 948 | 1_WT.nd2 | 7 | 118 | 2871 | 1 | 422.14 |
| 949 | 1_WT.nd2 | 7 | 119 | 3808 | 1 | 434.87 |
| 950 | 1_WT.nd2 | 7 | 120 | 2643 | 1 | 425.79 |
| 951 | 1_WT.nd2 | 7 | 121 | 2538 | 1 | 439.14 |
| 952 | 1_WT.nd2 | 8 | 1   | 2355 | 1 | 37.12  |
| 953 | 1_WT.nd2 | 8 | 2   | 2535 | 1 | 27.59  |
| 954 | 1_WT.nd2 | 8 | 3   | 2778 | 1 | 50.61  |
| 955 | 1_WT.nd2 | 8 | 4   | 2668 | 1 | 29.43  |
| 956 | 1_WT.nd2 | 8 | 5   | 3248 | 1 | 51.09  |
| 957 | 1_WT.nd2 | 8 | 6   | 2967 | 1 | 66.48  |
| 958 | 1_WT.nd2 | 8 | 7   | 2509 | 1 | 75.24  |
| 959 | 1_WT.nd2 | 8 | 8   | 2591 | 1 | 92.2   |
| 960 | 1_WT.nd2 | 8 | 9   | 2565 | 1 | 100    |
| 961 | 1_WT.nd2 | 8 | 10  | 2713 | 1 | 67.23  |
| 962 | 1_WT.nd2 | 8 | 11  | 2563 | 1 | 44.1   |
| 963 | 1_WT.nd2 | 8 | 12  | 2684 | 1 | 174.18 |
| 964 | 1_WT.nd2 | 8 | 13  | 2682 | 1 | 69.12  |
| 965 | 1_WT.nd2 | 8 | 14  | 3465 | 1 | 1      |
| 966 | 1_WT.nd2 | 8 | 15  | 3157 | 1 | 6      |
| 967 | 1_WT.nd2 | 8 | 16  | 2670 | 1 | 288.18 |
| 968 | 1_WT.nd2 | 8 | 17  | 3323 | 1 | 12.65  |
| 969 | 1_WT.nd2 | 8 | 18  | 3883 | 1 | 18.38  |
| 970 | 1_WT.nd2 | 8 | 19  | 3581 | 1 | 25.08  |
| 971 | 1_WT.nd2 | 8 | 20  | 2751 | 1 | 131    |
| 972 | 1_WT.nd2 | 8 | 21  | 3374 | 1 | 157    |
| 973 | 1_WT.nd2 | 8 | 22  | 4403 | 2 | 31.3   |
| 974 | 1_WT.nd2 | 8 | 23  | 2688 | 1 | 108.23 |
| 975 | 1_WT.nd2 | 8 | 24  | 3666 | 1 | 172.74 |
| 976 | 1_WT.nd2 | 8 | 25  | 5220 | 2 | 181.87 |
| 977 | 1_WT.nd2 | 8 | 26  | 3493 | 1 | 190.07 |
| 978 | 1_WT.nd2 | 8 | 27  | 3120 | 1 | 360.56 |
| 979 | 1_WT.nd2 | 8 | 28  | 2916 | 1 | 346.16 |
| 980 | 1_WT.nd2 | 8 | 29  | 4072 | 1 | 192.57 |
| 981 | 1_WT.nd2 | 8 | 30  | 3884 | 1 | 187.68 |
| 982 | 1_WT.nd2 | 8 | 31  | 5016 | 2 | 195    |
| 983 | 1_WT.nd2 | 8 | 32  | 3483 | 1 | 355.68 |
| 984 | 1_WT.nd2 | 8 | 33  | 5250 | 2 | 351.52 |
| 985 | 1_WT.nd2 | 8 | 34  | 4692 | 2 | 202.07 |

|      |          |   |    |       |    |        |
|------|----------|---|----|-------|----|--------|
| 986  | 1_WT.nd2 | 8 | 35 | 4131  | 1  | 353.99 |
| 987  | 1_WT.nd2 | 8 | 36 | 2969  | 1  | 354.12 |
| 988  | 1_WT.nd2 | 8 | 37 | 2731  | 1  | 418.07 |
| 989  | 1_WT.nd2 | 8 | 38 | 3971  | 1  | 353.06 |
| 990  | 1_WT.nd2 | 8 | 39 | 2885  | 1  | 150.08 |
| 991  | 1_WT.nd2 | 8 | 40 | 2558  | 1  | 174.81 |
| 992  | 1_WT.nd2 | 8 | 41 | 3246  | 1  | 227.77 |
| 993  | 1_WT.nd2 | 8 | 42 | 3375  | 1  | 342.46 |
| 994  | 1_WT.nd2 | 8 | 43 | 3813  | 1  | 438.95 |
| 995  | 1_WT.nd2 | 8 | 44 | 5652  | 2  | 443.43 |
| 996  | 1_WT.nd2 | 8 | 45 | 2838  | 1  | 147    |
| 997  | 1_WT.nd2 | 8 | 46 | 7169  | 3  | 443.84 |
| 998  | 1_WT.nd2 | 8 | 47 | 2622  | 1  | 369.28 |
| 999  | 1_WT.nd2 | 8 | 48 | 8398  | 3  | 444.99 |
| 1000 | 1_WT.nd2 | 8 | 49 | 4959  | 2  | 446.79 |
| 1001 | 1_WT.nd2 | 8 | 50 | 5570  | 2  | 449.02 |
| 1002 | 1_WT.nd2 | 8 | 51 | 7179  | 3  | 450.92 |
| 1003 | 1_WT.nd2 | 8 | 52 | 6025  | 2  | 448.55 |
| 1004 | 1_WT.nd2 | 8 | 53 | 4039  | 1  | 463.25 |
| 1005 | 1_WT.nd2 | 8 | 54 | 3925  | 1  | 440.46 |
| 1006 | 1_WT.nd2 | 8 | 55 | 8476  | 3  | 453.56 |
| 1007 | 1_WT.nd2 | 8 | 56 | 5093  | 2  | 453.28 |
| 1008 | 1_WT.nd2 | 8 | 57 | 3683  | 1  | 334.25 |
| 1009 | 1_WT.nd2 | 8 | 58 | 5043  | 2  | 450.4  |
| 1010 | 1_WT.nd2 | 8 | 59 | 56704 | 20 | 450.37 |
| 1011 | 1_WT.nd2 | 8 | 60 | 8272  | 3  | 453.04 |
| 1012 | 1_WT.nd2 | 8 | 61 | 3505  | 1  | 454.43 |
| 1013 | 1_WT.nd2 | 8 | 62 | 2807  | 1  | 342.5  |
| 1014 | 1_WT.nd2 | 8 | 63 | 2571  | 1  | 544.49 |
| 1015 | 1_WT.nd2 | 8 | 64 | 3444  | 1  | 519.22 |
| 1016 | 1_WT.nd2 | 8 | 65 | 2876  | 1  | 524.83 |
| 1017 | 1_WT.nd2 | 8 | 66 | 3045  | 1  | 546.97 |
| 1018 | 1_WT.nd2 | 8 | 67 | 2665  | 1  | 544.69 |
| 1019 | 1_WT.nd2 | 8 | 68 | 2947  | 1  | 557.32 |
| 1020 | 1_WT.nd2 | 8 | 69 | 2649  | 1  | 607.3  |
| 1021 | 1_WT.nd2 | 8 | 70 | 2637  | 1  | 577.26 |
| 1022 | 1_WT.nd2 | 8 | 71 | 2553  | 1  | 586.35 |
| 1023 | 1_WT.nd2 | 8 | 72 | 2647  | 1  | 594.81 |
| 1    | 5_WT.nd2 | 1 | 1  | 3521  | 1  | 120.43 |
| 2    | 5_WT.nd2 | 1 | 2  | 2773  | 1  | 124.26 |
| 3    | 5_WT.nd2 | 1 | 3  | 2878  | 1  | 4      |
| 4    | 5_WT.nd2 | 1 | 4  | 2431  | 1  | 138.41 |
| 5    | 5_WT.nd2 | 1 | 5  | 3160  | 1  | 341.72 |

|    |          |   |    |      |   |        |
|----|----------|---|----|------|---|--------|
| 6  | 5_WT.nd2 | 1 | 6  | 2845 | 1 | 157.08 |
| 7  | 5_WT.nd2 | 1 | 7  | 2721 | 1 | 178.84 |
| 8  | 5_WT.nd2 | 1 | 8  | 3076 | 1 | 335.04 |
| 9  | 5_WT.nd2 | 1 | 9  | 2910 | 1 | 277.22 |
| 10 | 5_WT.nd2 | 1 | 10 | 3058 | 1 | 21.21  |
| 11 | 5_WT.nd2 | 1 | 11 | 3017 | 1 | 276.93 |
| 12 | 5_WT.nd2 | 1 | 12 | 2629 | 1 | 214.39 |
| 13 | 5_WT.nd2 | 1 | 13 | 2946 | 1 | 454.68 |
| 14 | 5_WT.nd2 | 1 | 14 | 2589 | 1 | 233.94 |
| 15 | 5_WT.nd2 | 1 | 15 | 3420 | 1 | 4.12   |
| 16 | 5_WT.nd2 | 1 | 16 | 2690 | 1 | 226.08 |
| 17 | 5_WT.nd2 | 1 | 17 | 2726 | 1 | 204    |
| 18 | 5_WT.nd2 | 1 | 18 | 3996 | 1 | 4      |
| 19 | 5_WT.nd2 | 1 | 19 | 4283 | 2 | 10.82  |
| 20 | 5_WT.nd2 | 1 | 20 | 2762 | 1 | 204    |
| 21 | 5_WT.nd2 | 1 | 21 | 3258 | 1 | 24.17  |
| 22 | 5_WT.nd2 | 1 | 22 | 4513 | 2 | 24.04  |
| 23 | 5_WT.nd2 | 1 | 23 | 3537 | 1 | 6.4    |
| 24 | 5_WT.nd2 | 1 | 24 | 4577 | 2 | 166.14 |
| 25 | 5_WT.nd2 | 1 | 25 | 3333 | 1 | 0      |
| 26 | 5_WT.nd2 | 1 | 26 | 2553 | 1 | 226.81 |
| 27 | 5_WT.nd2 | 1 | 27 | 3522 | 1 | 185.05 |
| 28 | 5_WT.nd2 | 1 | 28 | 4187 | 1 | 171.74 |
| 29 | 5_WT.nd2 | 1 | 29 | 4419 | 2 | 178.85 |
| 30 | 5_WT.nd2 | 1 | 30 | 2871 | 1 | 369.76 |
| 31 | 5_WT.nd2 | 1 | 31 | 3275 | 1 | 42.19  |
| 32 | 5_WT.nd2 | 1 | 32 | 3151 | 1 | 199.12 |
| 33 | 5_WT.nd2 | 1 | 33 | 4149 | 1 | 97.65  |
| 34 | 5_WT.nd2 | 1 | 34 | 3275 | 1 | 199.01 |
| 35 | 5_WT.nd2 | 1 | 35 | 3213 | 1 | 2      |
| 36 | 5_WT.nd2 | 1 | 36 | 3333 | 1 | 0      |
| 37 | 5_WT.nd2 | 1 | 37 | 3285 | 1 | 0      |
| 38 | 5_WT.nd2 | 1 | 38 | 3083 | 1 | 49.16  |
| 39 | 5_WT.nd2 | 1 | 39 | 3721 | 1 | 10.82  |
| 40 | 5_WT.nd2 | 2 | 1  | 2626 | 1 | 157.76 |
| 41 | 5_WT.nd2 | 2 | 2  | 3086 | 1 | 17     |
| 42 | 5_WT.nd2 | 2 | 3  | 2354 | 1 | 61.35  |
| 43 | 5_WT.nd2 | 2 | 4  | 3349 | 1 | 13     |
| 44 | 5_WT.nd2 | 2 | 5  | 2909 | 1 | 74.17  |
| 45 | 5_WT.nd2 | 2 | 6  | 3115 | 1 | 0      |
| 46 | 5_WT.nd2 | 2 | 7  | 3118 | 1 | 58.46  |
| 47 | 5_WT.nd2 | 2 | 8  | 3013 | 1 | 0      |
| 48 | 5_WT.nd2 | 2 | 9  | 3100 | 1 | 3.61   |

|    |          |   |    |      |   |        |
|----|----------|---|----|------|---|--------|
| 49 | 5_WT.nd2 | 2 | 10 | 3580 | 1 | 5.66   |
| 50 | 5_WT.nd2 | 2 | 11 | 3296 | 1 | 25.06  |
| 51 | 5_WT.nd2 | 2 | 12 | 2957 | 1 | 64.76  |
| 52 | 5_WT.nd2 | 2 | 13 | 2900 | 1 | 71.57  |
| 53 | 5_WT.nd2 | 2 | 14 | 2912 | 1 | 239.38 |
| 54 | 5_WT.nd2 | 2 | 15 | 3496 | 1 | 64     |
| 55 | 5_WT.nd2 | 2 | 16 | 4221 | 1 | 46     |
| 56 | 5_WT.nd2 | 2 | 17 | 2611 | 1 | 107.56 |
| 57 | 5_WT.nd2 | 2 | 18 | 3736 | 1 | 35.74  |
| 58 | 5_WT.nd2 | 2 | 19 | 3759 | 1 | 23.41  |
| 59 | 5_WT.nd2 | 2 | 20 | 4005 | 1 | 17.46  |
| 60 | 5_WT.nd2 | 2 | 21 | 3253 | 1 | 155.62 |
| 61 | 5_WT.nd2 | 2 | 22 | 4627 | 2 | 10.05  |
| 62 | 5_WT.nd2 | 2 | 23 | 4743 | 2 | 7      |
| 63 | 5_WT.nd2 | 2 | 24 | 5901 | 2 | 6.71   |
| 64 | 5_WT.nd2 | 2 | 25 | 3867 | 1 | 19.24  |
| 65 | 5_WT.nd2 | 2 | 26 | 4667 | 2 | 8.94   |
| 66 | 5_WT.nd2 | 2 | 27 | 4771 | 2 | 30.15  |
| 67 | 5_WT.nd2 | 2 | 28 | 5513 | 2 | 24.19  |
| 68 | 5_WT.nd2 | 2 | 29 | 3160 | 1 | 0      |
| 69 | 5_WT.nd2 | 2 | 30 | 3785 | 1 | 188.8  |
| 70 | 5_WT.nd2 | 2 | 31 | 3092 | 1 | 188.86 |
| 71 | 5_WT.nd2 | 2 | 32 | 3623 | 1 | 71.34  |
| 72 | 5_WT.nd2 | 2 | 33 | 2803 | 1 | 108.21 |
| 73 | 5_WT.nd2 | 3 | 1  | 3213 | 1 | 13     |
| 74 | 5_WT.nd2 | 3 | 2  | 3286 | 1 | 15.3   |
| 75 | 5_WT.nd2 | 3 | 3  | 3139 | 1 | 12.04  |
| 76 | 5_WT.nd2 | 3 | 4  | 3629 | 1 | 41.48  |
| 77 | 5_WT.nd2 | 3 | 5  | 4225 | 1 | 36     |
| 78 | 5_WT.nd2 | 3 | 6  | 3557 | 1 | 22.36  |
| 79 | 5_WT.nd2 | 3 | 7  | 5311 | 2 | 11     |
| 80 | 5_WT.nd2 | 3 | 8  | 4311 | 2 | 5      |
| 81 | 5_WT.nd2 | 3 | 9  | 4466 | 2 | 4.24   |
| 82 | 5_WT.nd2 | 3 | 10 | 5430 | 2 | 12.08  |
| 83 | 5_WT.nd2 | 3 | 11 | 5709 | 2 | 21.38  |
| 84 | 5_WT.nd2 | 3 | 12 | 4455 | 2 | 30.15  |
| 85 | 5_WT.nd2 | 3 | 13 | 3398 | 1 | 151.21 |
| 86 | 5_WT.nd2 | 3 | 14 | 3383 | 1 | 196.6  |
| 87 | 5_WT.nd2 | 3 | 15 | 3305 | 1 | 103.59 |
| 88 | 5_WT.nd2 | 4 | 1  | 2801 | 1 | 21.21  |
| 89 | 5_WT.nd2 | 4 | 2  | 3235 | 1 | 73     |
| 90 | 5_WT.nd2 | 4 | 3  | 3480 | 1 | 60.75  |
| 91 | 5_WT.nd2 | 4 | 4  | 3132 | 1 | 5.39   |

|     |          |   |    |      |   |        |
|-----|----------|---|----|------|---|--------|
| 92  | 5_WT.nd2 | 4 | 5  | 3147 | 1 | 35.74  |
| 93  | 5_WT.nd2 | 4 | 6  | 3064 | 1 | 31     |
| 94  | 5_WT.nd2 | 4 | 7  | 3349 | 1 | 0      |
| 95  | 5_WT.nd2 | 4 | 8  | 2517 | 1 | 42.76  |
| 96  | 5_WT.nd2 | 4 | 9  | 3748 | 1 | 8.49   |
| 97  | 5_WT.nd2 | 4 | 10 | 3202 | 1 | 32.53  |
| 98  | 5_WT.nd2 | 4 | 11 | 3479 | 1 | 45.97  |
| 99  | 5_WT.nd2 | 4 | 12 | 4186 | 1 | 51.66  |
| 100 | 5_WT.nd2 | 4 | 13 | 4186 | 1 | 56.64  |
| 101 | 5_WT.nd2 | 4 | 14 | 3264 | 1 | 150.7  |
| 102 | 5_WT.nd2 | 4 | 15 | 3287 | 1 | 111.97 |
| 103 | 5_WT.nd2 | 4 | 16 | 3172 | 1 | 129.62 |
| 104 | 5_WT.nd2 | 5 | 1  | 3232 | 1 | 59.91  |
| 105 | 5_WT.nd2 | 5 | 2  | 2945 | 1 | 6.71   |
| 106 | 5_WT.nd2 | 5 | 3  | 3169 | 1 | 0      |
| 107 | 5_WT.nd2 | 5 | 4  | 3518 | 1 | 8.49   |
| 108 | 5_WT.nd2 | 5 | 5  | 3358 | 1 | 36.77  |
| 109 | 5_WT.nd2 | 5 | 6  | 3934 | 1 | 50.93  |
| 110 | 5_WT.nd2 | 5 | 7  | 3999 | 1 | 55.97  |
| 111 | 5_WT.nd2 | 5 | 8  | 3124 | 1 | 111.68 |
| 112 | 5_WT.nd2 | 6 | 1  | 2964 | 1 | 131.19 |
| 113 | 5_WT.nd2 | 7 | 1  | 3168 | 1 | 36.62  |
| 114 | 5_WT.nd2 | 7 | 2  | 2725 | 1 | 36.4   |
| 115 | 5_WT.nd2 | 7 | 3  | 2878 | 1 | 24.04  |
| 116 | 5_WT.nd2 | 7 | 4  | 2968 | 1 | 34     |
| 117 | 5_WT.nd2 | 7 | 5  | 3153 | 1 | 39.12  |
| 118 | 5_WT.nd2 | 7 | 6  | 2900 | 1 | 28.64  |
| 119 | 5_WT.nd2 | 7 | 7  | 3572 | 1 | 0      |
| 120 | 5_WT.nd2 | 7 | 8  | 3519 | 1 | 89.68  |
| 121 | 5_WT.nd2 | 8 | 1  | 2856 | 1 | 0      |
| 122 | 5_WT.nd2 | 8 | 2  | 2388 | 1 | 141.85 |
| 123 | 5_WT.nd2 | 8 | 3  | 4394 | 2 | 265.36 |
| 124 | 5_WT.nd2 | 8 | 4  | 3245 | 1 | 268.27 |
| 125 | 5_WT.nd2 | 8 | 5  | 3954 | 1 | 273.28 |
| 126 | 5_WT.nd2 | 8 | 6  | 3981 | 1 | 273.08 |
| 127 | 5_WT.nd2 | 8 | 7  | 3380 | 1 | 267.88 |
| 128 | 5_WT.nd2 | 8 | 8  | 4017 | 1 | 153.84 |
| 129 | 5_WT.nd2 | 8 | 9  | 3213 | 1 | 102.3  |
| 130 | 5_WT.nd2 | 8 | 10 | 3275 | 1 | 154.99 |
| 131 | 5_WT.nd2 | 8 | 11 | 3118 | 1 | 193.49 |
| 132 | 5_WT.nd2 | 8 | 12 | 3163 | 1 | 156.42 |
| 133 | 5_WT.nd2 | 8 | 13 | 3030 | 1 | 39.92  |
| 134 | 5_WT.nd2 | 8 | 14 | 3207 | 1 | 124.79 |

|     |          |    |    |      |   |        |
|-----|----------|----|----|------|---|--------|
| 135 | 5_WT.nd2 | 8  | 15 | 4482 | 2 | 55.33  |
| 136 | 5_WT.nd2 | 8  | 16 | 3684 | 1 | 62.01  |
| 137 | 5_WT.nd2 | 8  | 17 | 4371 | 2 | 23.6   |
| 138 | 5_WT.nd2 | 8  | 18 | 3238 | 1 | 23.71  |
| 139 | 5_WT.nd2 | 8  | 19 | 3052 | 1 | 26.87  |
| 140 | 5_WT.nd2 | 8  | 20 | 3316 | 1 | 16.03  |
| 141 | 5_WT.nd2 | 8  | 21 | 3832 | 1 | 16.12  |
| 142 | 5_WT.nd2 | 8  | 22 | 3349 | 1 | 12.17  |
| 143 | 5_WT.nd2 | 8  | 23 | 3287 | 1 | 8.49   |
| 144 | 5_WT.nd2 | 8  | 24 | 3725 | 1 | 3      |
| 145 | 5_WT.nd2 | 8  | 25 | 3268 | 1 | 8.6    |
| 146 | 5_WT.nd2 | 8  | 26 | 3859 | 1 | 7.21   |
| 147 | 5_WT.nd2 | 8  | 27 | 3417 | 1 | 13     |
| 148 | 5_WT.nd2 | 8  | 28 | 3168 | 1 | 0      |
| 149 | 5_WT.nd2 | 8  | 29 | 3266 | 1 | 19.24  |
| 150 | 5_WT.nd2 | 8  | 30 | 4316 | 2 | 10.82  |
| 151 | 5_WT.nd2 | 8  | 31 | 3736 | 1 | 87.68  |
| 152 | 5_WT.nd2 | 9  | 1  | 3891 | 1 | 196.98 |
| 153 | 5_WT.nd2 | 9  | 2  | 3613 | 1 | 206.77 |
| 154 | 5_WT.nd2 | 9  | 3  | 3163 | 1 | 52.35  |
| 155 | 5_WT.nd2 | 9  | 4  | 3671 | 1 | 267.58 |
| 156 | 5_WT.nd2 | 9  | 5  | 3340 | 1 | 269.76 |
| 157 | 5_WT.nd2 | 9  | 6  | 3450 | 1 | 275.07 |
| 158 | 5_WT.nd2 | 9  | 7  | 3259 | 1 | 258.28 |
| 159 | 5_WT.nd2 | 9  | 8  | 2818 | 1 | 222.61 |
| 160 | 5_WT.nd2 | 9  | 9  | 2987 | 1 | 242.07 |
| 161 | 5_WT.nd2 | 9  | 10 | 3001 | 1 | 244    |
| 162 | 5_WT.nd2 | 9  | 11 | 2674 | 1 | 299.41 |
| 163 | 5_WT.nd2 | 9  | 12 | 3868 | 1 | 348.66 |
| 164 | 5_WT.nd2 | 9  | 13 | 4174 | 1 | 350.29 |
| 165 | 5_WT.nd2 | 9  | 14 | 4299 | 2 | 353.55 |
| 166 | 5_WT.nd2 | 9  | 15 | 4786 | 2 | 355.6  |
| 167 | 5_WT.nd2 | 9  | 16 | 5066 | 2 | 358.93 |
| 168 | 5_WT.nd2 | 9  | 17 | 5121 | 2 | 359.78 |
| 169 | 5_WT.nd2 | 9  | 18 | 4034 | 1 | 362.17 |
| 170 | 5_WT.nd2 | 9  | 19 | 3265 | 1 | 439.28 |
| 171 | 5_WT.nd2 | 11 | 1  | 3135 | 1 | 18.38  |
| 172 | 5_WT.nd2 | 11 | 2  | 3037 | 1 | 27     |
| 173 | 5_WT.nd2 | 11 | 3  | 2991 | 1 | 56.04  |
| 174 | 5_WT.nd2 | 11 | 4  | 3867 | 1 | 33.06  |
| 175 | 5_WT.nd2 | 11 | 5  | 3746 | 1 | 42.05  |
| 176 | 5_WT.nd2 | 11 | 6  | 3744 | 1 | 49.24  |
| 177 | 5_WT.nd2 | 11 | 7  | 2946 | 1 | 383.02 |



|     |          |    |    |       |    |        |
|-----|----------|----|----|-------|----|--------|
| 178 | 5_WT.nd2 | 11 | 8  | 3296  | 1  | 246.79 |
| 179 | 5_WT.nd2 | 11 | 9  | 5783  | 2  | 152.05 |
| 180 | 5_WT.nd2 | 11 | 10 | 5541  | 2  | 164.3  |
| 181 | 5_WT.nd2 | 11 | 11 | 4349  | 2  | 246.22 |
| 182 | 5_WT.nd2 | 11 | 12 | 5464  | 2  | 164.5  |
| 183 | 5_WT.nd2 | 11 | 13 | 2706  | 1  | 224.86 |
| 184 | 5_WT.nd2 | 11 | 14 | 3421  | 1  | 6.4    |
| 185 | 5_WT.nd2 | 11 | 15 | 3597  | 1  | 6.32   |
| 186 | 5_WT.nd2 | 11 | 16 | 2897  | 1  | 216.91 |
| 187 | 5_WT.nd2 | 11 | 17 | 3150  | 1  | 64.38  |
| 188 | 5_WT.nd2 | 11 | 18 | 3044  | 1  | 3      |
| 189 | 5_WT.nd2 | 11 | 19 | 3146  | 1  | 37.01  |
| 190 | 5_WT.nd2 | 11 | 20 | 4353  | 2  | 4      |
| 191 | 5_WT.nd2 | 11 | 21 | 3165  | 1  | 42.72  |
| 192 | 5_WT.nd2 | 11 | 22 | 3094  | 1  | 0      |
| 193 | 5_WT.nd2 | 11 | 23 | 4295  | 2  | 57.31  |
| 194 | 5_WT.nd2 | 11 | 24 | 4210  | 1  | 54.74  |
| 195 | 5_WT.nd2 | 11 | 25 | 3437  | 1  | 62.01  |
| 196 | 5_WT.nd2 | 11 | 26 | 3245  | 1  | 69.29  |
| 197 | 5_WT.nd2 | 12 | 1  | 3016  | 1  | 42.76  |
| 198 | 5_WT.nd2 | 12 | 2  | 2979  | 1  | 16.55  |
| 199 | 5_WT.nd2 | 12 | 3  | 2829  | 1  | 8      |
| 200 | 5_WT.nd2 | 12 | 4  | 40905 | 15 | 0      |
| 201 | 5_WT.nd2 | 12 | 5  | 3598  | 1  | 0      |
| 202 | 5_WT.nd2 | 12 | 6  | 3246  | 1  | 4.24   |
| 203 | 5_WT.nd2 | 12 | 7  | 2760  | 1  | 12.04  |
| 204 | 5_WT.nd2 | 12 | 8  | 3606  | 1  | 72.09  |
| 205 | 5_WT.nd2 | 12 | 9  | 2805  | 1  | 22     |
| 206 | 5_WT.nd2 | 12 | 10 | 2742  | 1  | 42     |
| 207 | 5_WT.nd2 | 12 | 11 | 3239  | 1  | 78.43  |
| 208 | 5_WT.nd2 | 12 | 12 | 3187  | 1  | 75.43  |
| 209 | 5_WT.nd2 | 12 | 13 | 3035  | 1  | 92.96  |
| 210 | 5_WT.nd2 | 12 | 14 | 2585  | 1  | 140.94 |
| 211 | 5_WT.nd2 | 12 | 15 | 2579  | 1  | 80.22  |
| 212 | 5_WT.nd2 | 12 | 16 | 2944  | 1  | 24.08  |
| 213 | 5_WT.nd2 | 12 | 17 | 5519  | 2  | 2      |
| 214 | 5_WT.nd2 | 12 | 18 | 3369  | 1  | 0      |
| 215 | 5_WT.nd2 | 12 | 19 | 3041  | 1  | 0      |
| 216 | 5_WT.nd2 | 12 | 20 | 3221  | 1  | 4.24   |
| 217 | 5_WT.nd2 | 12 | 21 | 7217  | 3  | 91.66  |
| 218 | 5_WT.nd2 | 12 | 22 | 4735  | 2  | 10     |
| 219 | 5_WT.nd2 | 12 | 23 | 3167  | 1  | 15.81  |
| 220 | 5_WT.nd2 | 12 | 24 | 3285  | 1  | 101.65 |

|     |          |    |    |      |   |        |
|-----|----------|----|----|------|---|--------|
| 221 | 5_WT.nd2 | 12 | 25 | 4327 | 2 | 31.83  |
| 222 | 5_WT.nd2 | 12 | 26 | 4018 | 1 | 45.97  |
| 223 | 5_WT.nd2 | 12 | 27 | 3819 | 1 | 37.74  |
| 224 | 5_WT.nd2 | 12 | 28 | 2988 | 1 | 64.38  |
| 225 | 5_WT.nd2 | 12 | 29 | 2700 | 1 | 114.53 |
| 226 | 5_WT.nd2 | 12 | 30 | 3307 | 1 | 64.78  |
| 227 | 5_WT.nd2 | 12 | 31 | 3079 | 1 | 122.35 |
| 228 | 5_WT.nd2 | 12 | 32 | 2692 | 1 | 151.98 |
| 229 | 5_WT.nd2 | 12 | 33 | 2540 | 1 | 98.03  |
| 230 | 5_WT.nd2 | 12 | 34 | 3115 | 1 | 114.28 |
| 231 | 5_WT.nd2 | 12 | 35 | 3136 | 1 | 146.37 |
| 232 | 5_WT.nd2 | 12 | 36 | 3295 | 1 | 2      |
| 233 | 5_WT.nd2 | 12 | 37 | 2450 | 1 | 1.41   |
| 234 | 5_WT.nd2 | 12 | 38 | 2899 | 1 | 85.23  |
| 235 | 5_WT.nd2 | 12 | 39 | 3508 | 1 | 6.4    |
| 236 | 5_WT.nd2 | 12 | 40 | 2907 | 1 | 16.28  |
| 237 | 5_WT.nd2 | 12 | 41 | 3564 | 1 | 8.06   |
| 238 | 5_WT.nd2 | 12 | 42 | 3812 | 1 | 13.45  |
| 239 | 5_WT.nd2 | 12 | 43 | 3407 | 1 | 27.46  |
| 240 | 5_WT.nd2 | 13 | 1  | 2756 | 1 | 0      |
| 241 | 5_WT.nd2 | 13 | 2  | 2629 | 1 | 71.69  |
| 242 | 5_WT.nd2 | 13 | 3  | 4141 | 1 | 0      |
| 243 | 5_WT.nd2 | 13 | 4  | 5240 | 2 | 91.55  |
| 244 | 5_WT.nd2 | 13 | 5  | 3502 | 1 | 9      |
| 245 | 5_WT.nd2 | 13 | 6  | 2735 | 1 | 101.39 |
| 246 | 5_WT.nd2 | 13 | 7  | 3388 | 1 | 32.53  |
| 247 | 5_WT.nd2 | 13 | 8  | 3132 | 1 | 46.67  |
| 248 | 5_WT.nd2 | 13 | 9  | 2765 | 1 | 36.89  |
| 249 | 5_WT.nd2 | 13 | 10 | 2900 | 1 | 115.25 |
| 250 | 5_WT.nd2 | 13 | 11 | 2697 | 1 | 147.08 |
| 251 | 5_WT.nd2 | 13 | 12 | 3047 | 1 | 3      |
| 252 | 5_WT.nd2 | 13 | 13 | 3180 | 1 | 5.66   |
| 253 | 5_WT.nd2 | 13 | 14 | 3557 | 1 | 8.06   |
| 254 | 5_WT.nd2 | 13 | 15 | 3435 | 1 | 12.81  |
| 255 | 5_WT.nd2 | 14 | 1  | 2598 | 1 | 8.25   |
| 256 | 5_WT.nd2 | 14 | 2  | 2732 | 1 | 15     |
| 257 | 5_WT.nd2 | 14 | 3  | 3298 | 1 | 18.38  |
| 258 | 5_WT.nd2 | 14 | 4  | 3703 | 1 | 16.55  |
| 259 | 5_WT.nd2 | 14 | 5  | 3879 | 1 | 16     |
| 260 | 5_WT.nd2 | 14 | 6  | 4169 | 1 | 18     |
| 261 | 5_WT.nd2 | 14 | 7  | 3231 | 1 | 22.14  |
| 262 | 5_WT.nd2 | 14 | 8  | 3185 | 1 | 29.15  |
| 263 | 5_WT.nd2 | 14 | 9  | 3274 | 1 | 38.59  |

|     |          |    |    |      |   |        |
|-----|----------|----|----|------|---|--------|
| 264 | 5_WT.nd2 | 14 | 10 | 3184 | 1 | 50.8   |
| 265 | 5_WT.nd2 | 14 | 11 | 3516 | 1 | 68     |
| 266 | 5_WT.nd2 | 14 | 12 | 2749 | 1 | 71     |
| 267 | 5_WT.nd2 | 14 | 13 | 2903 | 1 | 74.33  |
| 268 | 5_WT.nd2 | 14 | 14 | 3230 | 1 | 85.59  |
| 269 | 5_WT.nd2 | 14 | 15 | 3113 | 1 | 70.26  |
| 270 | 5_WT.nd2 | 14 | 16 | 3210 | 1 | 47.41  |
| 271 | 5_WT.nd2 | 14 | 17 | 3673 | 1 | 42.8   |
| 272 | 5_WT.nd2 | 14 | 18 | 3341 | 1 | 34.48  |
| 273 | 5_WT.nd2 | 14 | 19 | 3263 | 1 | 50.21  |
| 274 | 5_WT.nd2 | 14 | 20 | 3530 | 1 | 26.93  |
| 275 | 5_WT.nd2 | 14 | 21 | 3994 | 1 | 30.89  |
| 276 | 5_WT.nd2 | 14 | 22 | 3362 | 1 | 38.28  |
| 277 | 5_WT.nd2 | 14 | 23 | 4142 | 1 | 20.62  |
| 278 | 5_WT.nd2 | 14 | 24 | 4823 | 2 | 22.36  |
| 279 | 5_WT.nd2 | 14 | 25 | 4143 | 1 | 15.13  |
| 280 | 5_WT.nd2 | 14 | 26 | 4469 | 2 | 23.35  |
| 281 | 5_WT.nd2 | 14 | 27 | 5179 | 2 | 29.07  |
| 282 | 5_WT.nd2 | 14 | 28 | 3218 | 1 | 21.21  |
| 283 | 5_WT.nd2 | 14 | 29 | 3851 | 1 | 13.34  |
| 284 | 5_WT.nd2 | 14 | 30 | 3721 | 1 | 23.35  |
| 285 | 5_WT.nd2 | 14 | 31 | 3664 | 1 | 13.6   |
| 286 | 5_WT.nd2 | 14 | 32 | 3003 | 1 | 22.36  |
| 287 | 5_WT.nd2 | 14 | 33 | 4152 | 1 | 12.73  |
| 288 | 5_WT.nd2 | 14 | 34 | 3333 | 1 | 10     |
| 289 | 5_WT.nd2 | 14 | 35 | 4376 | 2 | 18.38  |
| 290 | 5_WT.nd2 | 14 | 36 | 3974 | 1 | 8.06   |
| 291 | 5_WT.nd2 | 14 | 37 | 3097 | 1 | 14.87  |
| 292 | 5_WT.nd2 | 14 | 38 | 4070 | 1 | 5      |
| 293 | 5_WT.nd2 | 14 | 39 | 5598 | 2 | 10.63  |
| 294 | 5_WT.nd2 | 14 | 40 | 4101 | 1 | 5.83   |
| 295 | 5_WT.nd2 | 14 | 41 | 3283 | 1 | 8.49   |
| 296 | 5_WT.nd2 | 14 | 42 | 4095 | 1 | 8.94   |
| 297 | 5_WT.nd2 | 14 | 43 | 3277 | 1 | 0      |
| 298 | 5_WT.nd2 | 14 | 44 | 3191 | 1 | 16     |
| 299 | 5_WT.nd2 | 14 | 45 | 4860 | 2 | 0      |
| 300 | 5_WT.nd2 | 14 | 46 | 3349 | 1 | 1      |
| 301 | 5_WT.nd2 | 14 | 47 | 3844 | 1 | 1.41   |
| 302 | 5_WT.nd2 | 14 | 48 | 2913 | 1 | 94.92  |
| 303 | 5_WT.nd2 | 15 | 1  | 2690 | 1 | 260.3  |
| 304 | 5_WT.nd2 | 15 | 2  | 3446 | 1 | 231.61 |
| 305 | 5_WT.nd2 | 15 | 3  | 2926 | 1 | 227.54 |
| 306 | 5_WT.nd2 | 15 | 4  | 2967 | 1 | 221.42 |

|     |          |    |    |      |   |        |
|-----|----------|----|----|------|---|--------|
| 307 | 5_WT.nd2 | 15 | 5  | 2972 | 1 | 1      |
| 308 | 5_WT.nd2 | 15 | 6  | 3161 | 1 | 68     |
| 309 | 5_WT.nd2 | 15 | 7  | 3473 | 1 | 52.7   |
| 310 | 5_WT.nd2 | 15 | 8  | 3915 | 1 | 40.61  |
| 311 | 5_WT.nd2 | 15 | 9  | 4394 | 2 | 33.94  |
| 312 | 5_WT.nd2 | 15 | 10 | 4229 | 2 | 26.17  |
| 313 | 5_WT.nd2 | 15 | 11 | 3709 | 1 | 17.69  |
| 314 | 5_WT.nd2 | 15 | 12 | 4375 | 2 | 9.22   |
| 315 | 5_WT.nd2 | 15 | 13 | 3921 | 1 | 15.65  |
| 316 | 5_WT.nd2 | 15 | 14 | 2909 | 1 | 13.6   |
| 317 | 5_WT.nd2 | 15 | 15 | 4147 | 1 | 0      |
| 318 | 5_WT.nd2 | 15 | 16 | 3304 | 1 | 0      |
| 319 | 5_WT.nd2 | 15 | 17 | 4250 | 2 | 1.41   |
| 320 | 5_WT.nd2 | 15 | 18 | 4216 | 1 | 8.54   |
| 321 | 5_WT.nd2 | 16 | 1  | 2840 | 1 | 493    |
| 322 | 5_WT.nd2 | 16 | 2  | 2760 | 1 | 157.47 |
| 323 | 5_WT.nd2 | 16 | 3  | 2841 | 1 | 45.31  |
| 324 | 5_WT.nd2 | 16 | 4  | 3514 | 1 | 32.2   |
| 325 | 5_WT.nd2 | 16 | 5  | 3384 | 1 | 18.79  |
| 326 | 5_WT.nd2 | 16 | 6  | 3485 | 1 | 6      |
| 327 | 5_WT.nd2 | 16 | 7  | 3722 | 1 | 5      |
| 328 | 5_WT.nd2 | 16 | 8  | 3424 | 1 | 0      |
| 329 | 5_WT.nd2 | 16 | 9  | 3848 | 1 | 0      |
| 330 | 5_WT.nd2 | 16 | 10 | 3416 | 1 | 83.01  |
| 331 | 5_WT.nd2 | 16 | 11 | 3716 | 1 | 22     |
| 332 | 5_WT.nd2 | 16 | 12 | 3475 | 1 | 72.18  |
| 333 | 5_WT.nd2 | 16 | 13 | 3532 | 1 | 69.46  |
| 334 | 5_WT.nd2 | 16 | 14 | 4071 | 1 | 0      |
| 335 | 5_WT.nd2 | 16 | 15 | 3696 | 1 | 64     |
| 336 | 5_WT.nd2 | 16 | 16 | 3382 | 1 | 0      |
| 337 | 5_WT.nd2 | 16 | 17 | 5591 | 2 | 0      |
| 338 | 5_WT.nd2 | 16 | 18 | 5225 | 2 | 0      |
| 339 | 5_WT.nd2 | 16 | 19 | 3349 | 1 | 5      |
| 340 | 5_WT.nd2 | 16 | 20 | 5777 | 2 | 7.81   |
| 341 | 5_WT.nd2 | 16 | 21 | 2732 | 1 | 13.89  |
| 342 | 5_WT.nd2 | 16 | 22 | 4177 | 1 | 17.8   |
| 343 | 5_WT.nd2 | 16 | 23 | 3583 | 1 | 24.41  |
| 344 | 5_WT.nd2 | 16 | 24 | 3210 | 1 | 33.96  |
| 345 | 5_WT.nd2 | 16 | 25 | 3230 | 1 | 35.85  |
| 346 | 5_WT.nd2 | 16 | 26 | 2945 | 1 | 133.7  |
| 347 | 5_WT.nd2 | 16 | 27 | 3631 | 1 | 114.63 |
| 348 | 5_WT.nd2 | 16 | 28 | 3488 | 1 | 119.42 |
| 349 | 5_WT.nd2 | 16 | 29 | 2994 | 1 | 161.34 |

|     |          |    |    |      |   |        |
|-----|----------|----|----|------|---|--------|
| 350 | 5_WT.nd2 | 16 | 30 | 3729 | 1 | 130.38 |
| 351 | 5_WT.nd2 | 16 | 31 | 3496 | 1 | 160.9  |
| 352 | 5_WT.nd2 | 16 | 32 | 3748 | 1 | 139.83 |
| 353 | 5_WT.nd2 | 16 | 33 | 3524 | 1 | 140.51 |
| 354 | 5_WT.nd2 | 16 | 34 | 3831 | 1 | 150.27 |
| 355 | 5_WT.nd2 | 16 | 35 | 5360 | 2 | 165.37 |
| 356 | 5_WT.nd2 | 16 | 36 | 3533 | 1 | 176.4  |
| 357 | 5_WT.nd2 | 16 | 37 | 3213 | 1 | 12     |
| 358 | 5_WT.nd2 | 16 | 38 | 3053 | 1 | 3      |
| 359 | 5_WT.nd2 | 16 | 39 | 3769 | 1 | 0      |
| 360 | 5_WT.nd2 | 16 | 40 | 4283 | 2 | 40.31  |
| 361 | 5_WT.nd2 | 16 | 41 | 3340 | 1 | 413.49 |
| 362 | 5_WT.nd2 | 16 | 42 | 4054 | 1 | 10     |
| 363 | 5_WT.nd2 | 16 | 43 | 4873 | 2 | 20     |
| 364 | 5_WT.nd2 | 16 | 44 | 2960 | 1 | 23.02  |
| 365 | 5_WT.nd2 | 16 | 45 | 3936 | 1 | 478.28 |
| 366 | 5_WT.nd2 | 16 | 46 | 4102 | 1 | 477.67 |
| 367 | 5_WT.nd2 | 16 | 47 | 7589 | 3 | 28     |
| 368 | 5_WT.nd2 | 17 | 1  | 3972 | 1 | 79.92  |
| 369 | 5_WT.nd2 | 17 | 2  | 4895 | 2 | 130.38 |
| 370 | 5_WT.nd2 | 17 | 3  | 3128 | 1 | 85.7   |
| 371 | 5_WT.nd2 | 17 | 4  | 3023 | 1 | 72.12  |
| 372 | 5_WT.nd2 | 17 | 5  | 3142 | 1 | 50.57  |
| 373 | 5_WT.nd2 | 17 | 6  | 4312 | 2 | 108.26 |
| 374 | 5_WT.nd2 | 17 | 7  | 4075 | 1 | 33.62  |
| 375 | 5_WT.nd2 | 17 | 8  | 2961 | 1 | 68.48  |
| 376 | 5_WT.nd2 | 17 | 9  | 3244 | 1 | 30.41  |
| 377 | 5_WT.nd2 | 17 | 10 | 3266 | 1 | 19     |
| 378 | 5_WT.nd2 | 17 | 11 | 3654 | 1 | 36.4   |
| 379 | 5_WT.nd2 | 17 | 12 | 3672 | 1 | 23.43  |
| 380 | 5_WT.nd2 | 17 | 13 | 3344 | 1 | 41.34  |
| 381 | 5_WT.nd2 | 17 | 14 | 2851 | 1 | 87.64  |
| 382 | 5_WT.nd2 | 17 | 15 | 3078 | 1 | 30.23  |
| 383 | 5_WT.nd2 | 17 | 16 | 3435 | 1 | 0      |
| 384 | 5_WT.nd2 | 17 | 17 | 3232 | 1 | 99     |
| 385 | 5_WT.nd2 | 17 | 18 | 3634 | 1 | 3      |
| 386 | 5_WT.nd2 | 17 | 19 | 3773 | 1 | 16.16  |
| 387 | 5_WT.nd2 | 17 | 20 | 3117 | 1 | 9.22   |
| 388 | 5_WT.nd2 | 17 | 21 | 3445 | 1 | 17.03  |
| 389 | 5_WT.nd2 | 17 | 22 | 3611 | 1 | 10     |
| 390 | 5_WT.nd2 | 17 | 23 | 3386 | 1 | 36.89  |
| 391 | 5_WT.nd2 | 17 | 24 | 3986 | 1 | 25     |
| 392 | 5_WT.nd2 | 17 | 25 | 3952 | 1 | 30.41  |

|     |          |    |    |       |    |        |
|-----|----------|----|----|-------|----|--------|
| 393 | 5_WT.nd2 | 17 | 26 | 3490  | 1  | 30     |
| 394 | 5_WT.nd2 | 17 | 27 | 3721  | 1  | 32.98  |
| 395 | 5_WT.nd2 | 17 | 28 | 4323  | 2  | 42.44  |
| 396 | 5_WT.nd2 | 17 | 29 | 4837  | 2  | 37.66  |
| 397 | 5_WT.nd2 | 17 | 30 | 3563  | 1  | 49.04  |
| 398 | 5_WT.nd2 | 17 | 31 | 4198  | 1  | 39.81  |
| 399 | 5_WT.nd2 | 17 | 32 | 3533  | 1  | 52.43  |
| 400 | 5_WT.nd2 | 17 | 33 | 4308  | 2  | 43     |
| 401 | 5_WT.nd2 | 17 | 34 | 3759  | 1  | 46.04  |
| 402 | 5_WT.nd2 | 17 | 35 | 3340  | 1  | 67.27  |
| 403 | 5_WT.nd2 | 17 | 36 | 3552  | 1  | 57.27  |
| 404 | 5_WT.nd2 | 17 | 37 | 3264  | 1  | 68.24  |
| 405 | 5_WT.nd2 | 17 | 38 | 3319  | 1  | 80.28  |
| 406 | 5_WT.nd2 | 17 | 39 | 3122  | 1  | 62     |
| 407 | 5_WT.nd2 | 17 | 40 | 3388  | 1  | 129.8  |
| 408 | 5_WT.nd2 | 17 | 41 | 3986  | 1  | 80.78  |
| 409 | 5_WT.nd2 | 17 | 42 | 4088  | 1  | 80.96  |
| 410 | 5_WT.nd2 | 17 | 43 | 3754  | 1  | 93.56  |
| 411 | 5_WT.nd2 | 17 | 44 | 3013  | 1  | 102.88 |
| 412 | 5_WT.nd2 | 17 | 45 | 4095  | 1  | 103.41 |
| 413 | 5_WT.nd2 | 17 | 46 | 3777  | 1  | 104.69 |
| 414 | 5_WT.nd2 | 17 | 47 | 2968  | 1  | 169.04 |
| 415 | 5_WT.nd2 | 17 | 48 | 3148  | 1  | 115.21 |
| 416 | 5_WT.nd2 | 17 | 49 | 3393  | 1  | 183.21 |
| 417 | 5_WT.nd2 | 17 | 50 | 3500  | 1  | 130    |
| 418 | 5_WT.nd2 | 17 | 51 | 2833  | 1  | 375.45 |
| 419 | 5_WT.nd2 | 17 | 52 | 3419  | 1  | 372.25 |
| 420 | 5_WT.nd2 | 17 | 53 | 2916  | 1  | 192    |
| 421 | 5_WT.nd2 | 17 | 54 | 2871  | 1  | 213.46 |
| 422 | 5_WT.nd2 | 17 | 55 | 2750  | 1  | 163.03 |
| 423 | 5_WT.nd2 | 17 | 56 | 3458  | 1  | 81     |
| 424 | 5_WT.nd2 | 17 | 57 | 3505  | 1  | 185.59 |
| 425 | 5_WT.nd2 | 17 | 58 | 2831  | 1  | 335.81 |
| 426 | 5_WT.nd2 | 17 | 59 | 3334  | 1  | 220.1  |
| 427 | 5_WT.nd2 | 17 | 60 | 3304  | 1  | 199.22 |
| 428 | 5_WT.nd2 | 17 | 61 | 3201  | 1  | 123.44 |
| 429 | 5_WT.nd2 | 17 | 62 | 3851  | 1  | 147.53 |
| 430 | 5_WT.nd2 | 17 | 63 | 4129  | 1  | 130.29 |
| 431 | 5_WT.nd2 | 17 | 64 | 4619  | 2  | 157.97 |
| 432 | 5_WT.nd2 | 17 | 65 | 52294 | 19 | 163.02 |
| 433 | 5_WT.nd2 | 17 | 66 | 4622  | 2  | 200.26 |
| 434 | 5_WT.nd2 | 17 | 67 | 6095  | 2  | 192.35 |
| 435 | 5_WT.nd2 | 17 | 68 | 4709  | 2  | 181.18 |

|     |          |    |    |       |   |        |
|-----|----------|----|----|-------|---|--------|
| 436 | 5_WT.nd2 | 17 | 69 | 6197  | 2 | 160.64 |
| 437 | 5_WT.nd2 | 17 | 70 | 4297  | 2 | 152.83 |
| 438 | 5_WT.nd2 | 17 | 71 | 7460  | 3 | 168.34 |
| 439 | 5_WT.nd2 | 17 | 72 | 3750  | 1 | 35.36  |
| 440 | 5_WT.nd2 | 17 | 73 | 3446  | 1 | 21.47  |
| 441 | 5_WT.nd2 | 17 | 74 | 3525  | 1 | 1      |
| 442 | 5_WT.nd2 | 17 | 75 | 10690 | 4 | 6      |
| 443 | 5_WT.nd2 | 18 | 1  | 3089  | 1 | 249.72 |
| 444 | 5_WT.nd2 | 18 | 2  | 3176  | 1 | 30.89  |
| 445 | 5_WT.nd2 | 18 | 3  | 2890  | 1 | 22.47  |
| 446 | 5_WT.nd2 | 18 | 4  | 3339  | 1 | 16.12  |
| 447 | 5_WT.nd2 | 18 | 5  | 3481  | 1 | 7.62   |
| 448 | 5_WT.nd2 | 18 | 6  | 2597  | 1 | 12.04  |
| 449 | 5_WT.nd2 | 18 | 7  | 3674  | 1 | 2      |
| 450 | 5_WT.nd2 | 18 | 8  | 4237  | 2 | 1      |
| 451 | 5_WT.nd2 | 18 | 9  | 2808  | 1 | 0      |
| 452 | 5_WT.nd2 | 18 | 10 | 3197  | 1 | 49     |
| 453 | 5_WT.nd2 | 18 | 11 | 3098  | 1 | 8      |
| 454 | 5_WT.nd2 | 18 | 12 | 3506  | 1 | 87.85  |
| 455 | 5_WT.nd2 | 18 | 13 | 4169  | 1 | 64.44  |
| 456 | 5_WT.nd2 | 18 | 14 | 3695  | 1 | 63.16  |
| 457 | 5_WT.nd2 | 18 | 15 | 3272  | 1 | 45     |
| 458 | 5_WT.nd2 | 18 | 16 | 4010  | 1 | 66.47  |
| 459 | 5_WT.nd2 | 18 | 17 | 4853  | 2 | 60.11  |
| 460 | 5_WT.nd2 | 18 | 18 | 3798  | 1 | 54.45  |
| 461 | 5_WT.nd2 | 18 | 19 | 5571  | 2 | 60.02  |
| 462 | 5_WT.nd2 | 18 | 20 | 3856  | 1 | 38.83  |
| 463 | 5_WT.nd2 | 18 | 21 | 4230  | 2 | 45.25  |
| 464 | 5_WT.nd2 | 18 | 22 | 4123  | 1 | 7      |
| 465 | 5_WT.nd2 | 18 | 23 | 3822  | 1 | 42.43  |
| 466 | 5_WT.nd2 | 18 | 24 | 3602  | 1 | 28     |
| 467 | 5_WT.nd2 | 18 | 25 | 4139  | 1 | 29.43  |
| 468 | 5_WT.nd2 | 18 | 26 | 4149  | 1 | 27.29  |
| 469 | 5_WT.nd2 | 18 | 27 | 3587  | 1 | 31.38  |
| 470 | 5_WT.nd2 | 18 | 28 | 3582  | 1 | 28.16  |
| 471 | 5_WT.nd2 | 18 | 29 | 3171  | 1 | 10.44  |
| 472 | 5_WT.nd2 | 18 | 30 | 3162  | 1 | 56.08  |
| 473 | 5_WT.nd2 | 18 | 31 | 4709  | 2 | 0      |
| 474 | 5_WT.nd2 | 18 | 32 | 3120  | 1 | 9.9    |
| 475 | 5_WT.nd2 | 18 | 33 | 3331  | 1 | 36.4   |
| 476 | 5_WT.nd2 | 18 | 34 | 3843  | 1 | 0      |
| 477 | 5_WT.nd2 | 18 | 35 | 4537  | 2 | 18.38  |
| 478 | 5_WT.nd2 | 18 | 36 | 4323  | 2 | 5      |

|     |          |    |    |      |   |        |
|-----|----------|----|----|------|---|--------|
| 479 | 5_WT.nd2 | 18 | 37 | 2484 | 1 | 18.97  |
| 480 | 5_WT.nd2 | 18 | 38 | 5278 | 2 | 11.66  |
| 481 | 5_WT.nd2 | 18 | 39 | 3485 | 1 | 0      |
| 482 | 5_WT.nd2 | 18 | 40 | 4320 | 2 | 1      |
| 483 | 5_WT.nd2 | 18 | 41 | 3837 | 1 | 0      |
| 484 | 5_WT.nd2 | 18 | 42 | 3464 | 1 | 22     |
| 485 | 5_WT.nd2 | 18 | 43 | 2896 | 1 | 51.31  |
| 486 | 5_WT.nd2 | 18 | 44 | 2935 | 1 | 40.31  |
| 487 | 5_WT.nd2 | 18 | 45 | 3864 | 1 | 27.2   |
| 488 | 5_WT.nd2 | 18 | 46 | 3504 | 1 | 73.5   |
| 489 | 5_WT.nd2 | 18 | 47 | 3333 | 1 | 55.87  |
| 490 | 5_WT.nd2 | 18 | 48 | 3999 | 1 | 154.74 |
| 491 | 5_WT.nd2 | 18 | 49 | 3297 | 1 | 40.36  |
| 492 | 5_WT.nd2 | 18 | 50 | 3631 | 1 | 12.73  |
| 493 | 5_WT.nd2 | 18 | 51 | 3048 | 1 | 53.24  |
| 494 | 5_WT.nd2 | 18 | 52 | 4756 | 2 | 11     |
| 495 | 5_WT.nd2 | 18 | 53 | 3767 | 1 | 178    |
| 496 | 5_WT.nd2 | 18 | 54 | 3250 | 1 | 13.42  |
| 497 | 5_WT.nd2 | 18 | 55 | 3397 | 1 | 173.05 |
| 498 | 5_WT.nd2 | 18 | 56 | 3739 | 1 | 21.63  |
| 499 | 5_WT.nd2 | 18 | 57 | 3522 | 1 | 161.28 |
| 500 | 5_WT.nd2 | 18 | 58 | 2883 | 1 | 52.5   |
| 501 | 5_WT.nd2 | 19 | 1  | 2591 | 1 | 195.13 |
| 502 | 5_WT.nd2 | 19 | 2  | 2751 | 1 | 155.56 |
| 503 | 5_WT.nd2 | 19 | 3  | 3921 | 1 | 147.79 |
| 504 | 5_WT.nd2 | 19 | 4  | 3750 | 1 | 136.47 |
| 505 | 5_WT.nd2 | 19 | 5  | 3637 | 1 | 129.56 |
| 506 | 5_WT.nd2 | 19 | 6  | 3348 | 1 | 119.5  |
| 507 | 5_WT.nd2 | 19 | 7  | 4310 | 2 | 121.08 |
| 508 | 5_WT.nd2 | 19 | 8  | 4718 | 2 | 113.9  |
| 509 | 5_WT.nd2 | 19 | 9  | 5121 | 2 | 106.4  |
| 510 | 5_WT.nd2 | 19 | 10 | 4875 | 2 | 115.88 |
| 511 | 5_WT.nd2 | 19 | 11 | 3876 | 1 | 97.84  |
| 512 | 5_WT.nd2 | 19 | 12 | 2974 | 1 | 93.34  |
| 513 | 5_WT.nd2 | 19 | 13 | 3380 | 1 | 83.74  |
| 514 | 5_WT.nd2 | 19 | 14 | 4218 | 1 | 118.07 |
| 515 | 5_WT.nd2 | 19 | 15 | 2849 | 1 | 65.19  |
| 516 | 5_WT.nd2 | 19 | 16 | 3885 | 1 | 100.66 |
| 517 | 5_WT.nd2 | 19 | 17 | 3331 | 1 | 77.88  |
| 518 | 5_WT.nd2 | 19 | 18 | 3090 | 1 | 98.62  |
| 519 | 5_WT.nd2 | 19 | 19 | 2965 | 1 | 62.2   |
| 520 | 5_WT.nd2 | 19 | 20 | 3378 | 1 | 44.38  |
| 521 | 5_WT.nd2 | 19 | 21 | 3135 | 1 | 30.87  |



|     |          |    |    |      |   |        |
|-----|----------|----|----|------|---|--------|
| 522 | 5_WT.nd2 | 19 | 22 | 3570 | 1 | 4      |
| 523 | 5_WT.nd2 | 19 | 23 | 4004 | 1 | 16.97  |
| 524 | 5_WT.nd2 | 19 | 24 | 4628 | 2 | 8      |
| 525 | 5_WT.nd2 | 19 | 25 | 3815 | 1 | 0      |
| 526 | 5_WT.nd2 | 19 | 26 | 4248 | 2 | 0      |
| 527 | 5_WT.nd2 | 19 | 27 | 3189 | 1 | 19.72  |
| 528 | 5_WT.nd2 | 19 | 28 | 5166 | 2 | 8      |
| 529 | 5_WT.nd2 | 19 | 29 | 3534 | 1 | 17.46  |
| 530 | 5_WT.nd2 | 19 | 30 | 3517 | 1 | 19     |
| 531 | 5_WT.nd2 | 19 | 31 | 4007 | 1 | 9.22   |
| 532 | 5_WT.nd2 | 19 | 32 | 4362 | 2 | 0      |
| 533 | 5_WT.nd2 | 19 | 33 | 3640 | 1 | 6      |
| 534 | 5_WT.nd2 | 19 | 34 | 3380 | 1 | 9.22   |
| 535 | 5_WT.nd2 | 19 | 35 | 3683 | 1 | 18.87  |
| 536 | 5_WT.nd2 | 19 | 36 | 3527 | 1 | 1      |
| 537 | 5_WT.nd2 | 19 | 37 | 3563 | 1 | 28     |
| 538 | 5_WT.nd2 | 19 | 38 | 3597 | 1 | 10.44  |
| 539 | 5_WT.nd2 | 19 | 39 | 3415 | 1 | 2.83   |
| 540 | 5_WT.nd2 | 19 | 40 | 3435 | 1 | 20.52  |
| 541 | 5_WT.nd2 | 19 | 41 | 3551 | 1 | 31.89  |
| 542 | 5_WT.nd2 | 19 | 42 | 2774 | 1 | 38.01  |
| 543 | 5_WT.nd2 | 19 | 43 | 4597 | 2 | 25.46  |
| 544 | 5_WT.nd2 | 19 | 44 | 3356 | 1 | 31.83  |
| 545 | 5_WT.nd2 | 19 | 45 | 3862 | 1 | 1      |
| 546 | 5_WT.nd2 | 19 | 46 | 3479 | 1 | 11     |
| 547 | 5_WT.nd2 | 19 | 47 | 3380 | 1 | 1      |
| 548 | 5_WT.nd2 | 19 | 48 | 2627 | 1 | 51.62  |
| 549 | 5_WT.nd2 | 19 | 49 | 2591 | 1 | 74.33  |
| 550 | 5_WT.nd2 | 19 | 50 | 3993 | 1 | 13.45  |
| 551 | 5_WT.nd2 | 19 | 51 | 4309 | 2 | 6.32   |
| 552 | 5_WT.nd2 | 19 | 52 | 3890 | 1 | 0      |
| 553 | 5_WT.nd2 | 19 | 53 | 4025 | 1 | 0      |
| 554 | 5_WT.nd2 | 19 | 54 | 4387 | 2 | 2      |
| 555 | 5_WT.nd2 | 19 | 55 | 3532 | 1 | 0      |
| 556 | 5_WT.nd2 | 19 | 56 | 3333 | 1 | 3.61   |
| 557 | 5_WT.nd2 | 20 | 1  | 3636 | 1 | 189.53 |
| 558 | 5_WT.nd2 | 20 | 2  | 3105 | 1 | 123.33 |
| 559 | 5_WT.nd2 | 20 | 3  | 3659 | 1 | 25.5   |
| 560 | 5_WT.nd2 | 20 | 4  | 3526 | 1 | 3      |
| 561 | 5_WT.nd2 | 20 | 5  | 3089 | 1 | 3.16   |
| 562 | 5_WT.nd2 | 20 | 6  | 3440 | 1 | 9.22   |
| 563 | 5_WT.nd2 | 20 | 7  | 5841 | 2 | 8.6    |
| 564 | 5_WT.nd2 | 20 | 8  | 2819 | 1 | 45     |

|     |          |    |    |      |   |        |
|-----|----------|----|----|------|---|--------|
| 565 | 5_WT.nd2 | 20 | 9  | 3137 | 1 | 65.62  |
| 566 | 5_WT.nd2 | 20 | 10 | 2828 | 1 | 63.98  |
| 567 | 5_WT.nd2 | 20 | 11 | 3772 | 1 | 24     |
| 568 | 5_WT.nd2 | 20 | 12 | 5336 | 2 | 6      |
| 569 | 5_WT.nd2 | 20 | 13 | 3455 | 1 | 1      |
| 570 | 5_WT.nd2 | 20 | 14 | 4351 | 2 | 1      |
| 571 | 5_WT.nd2 | 20 | 15 | 5779 | 2 | 7      |
| 572 | 5_WT.nd2 | 20 | 16 | 3540 | 1 | 0      |
| 573 | 5_WT.nd2 | 20 | 17 | 3759 | 1 | 16.12  |
| 574 | 5_WT.nd2 | 20 | 18 | 3322 | 1 | 4      |
| 575 | 5_WT.nd2 | 20 | 19 | 4363 | 2 | 21.4   |
| 576 | 5_WT.nd2 | 20 | 20 | 5235 | 2 | 105.72 |
| 577 | 5_WT.nd2 | 20 | 21 | 4424 | 2 | 39.6   |
| 578 | 5_WT.nd2 | 20 | 22 | 2965 | 1 | 49.2   |
| 579 | 5_WT.nd2 | 20 | 23 | 3013 | 1 | 72.84  |
| 580 | 5_WT.nd2 | 20 | 24 | 3623 | 1 | 316.12 |
| 581 | 5_WT.nd2 | 21 | 1  | 2821 | 1 | 11     |
| 582 | 5_WT.nd2 | 21 | 2  | 2705 | 1 | 308.02 |
| 583 | 5_WT.nd2 | 21 | 3  | 3753 | 1 | 21.21  |
| 584 | 5_WT.nd2 | 21 | 4  | 3155 | 1 | 0      |
| 585 | 5_WT.nd2 | 21 | 5  | 4543 | 2 | 3      |
| 586 | 5_WT.nd2 | 21 | 6  | 3328 | 1 | 0      |
| 587 | 5_WT.nd2 | 21 | 7  | 4862 | 2 | 2.83   |
| 588 | 5_WT.nd2 | 21 | 8  | 4290 | 2 | 7.81   |
| 589 | 5_WT.nd2 | 21 | 9  | 5016 | 2 | 12.21  |
| 590 | 5_WT.nd2 | 21 | 10 | 3255 | 1 | 27.59  |
| 591 | 5_WT.nd2 | 21 | 11 | 3867 | 1 | 24.17  |
| 592 | 5_WT.nd2 | 21 | 12 | 3493 | 1 | 60.83  |
| 593 | 5_WT.nd2 | 21 | 13 | 2929 | 1 | 49.82  |
| 594 | 5_WT.nd2 | 21 | 14 | 3122 | 1 | 48.04  |
| 595 | 5_WT.nd2 | 21 | 15 | 2627 | 1 | 15     |
| 596 | 5_WT.nd2 | 21 | 16 | 3385 | 1 | 13.04  |
| 597 | 5_WT.nd2 | 21 | 17 | 3755 | 1 | 38.48  |
| 598 | 5_WT.nd2 | 21 | 18 | 2981 | 1 | 24.04  |
| 599 | 5_WT.nd2 | 21 | 19 | 4309 | 2 | 29.27  |
| 600 | 5_WT.nd2 | 21 | 20 | 4078 | 1 | 30.41  |
| 601 | 5_WT.nd2 | 21 | 21 | 4147 | 1 | 23     |
| 602 | 5_WT.nd2 | 21 | 22 | 3459 | 1 | 265.29 |
| 603 | 5_WT.nd2 | 21 | 23 | 3387 | 1 | 278.35 |
| 604 | 5_WT.nd2 | 21 | 24 | 3251 | 1 | 283.02 |
| 605 | 5_WT.nd2 | 21 | 25 | 3554 | 1 | 57.56  |
| 606 | 5_WT.nd2 | 21 | 26 | 3043 | 1 | 299.46 |
| 607 | 5_WT.nd2 | 21 | 27 | 3781 | 1 | 294.12 |

|     |          |    |    |      |   |        |
|-----|----------|----|----|------|---|--------|
| 608 | 5_WT.nd2 | 21 | 28 | 4436 | 2 | 304.33 |
| 609 | 5_WT.nd2 | 21 | 29 | 3235 | 1 | 298.68 |
| 610 | 5_WT.nd2 | 21 | 30 | 3646 | 1 | 16     |
| 611 | 5_WT.nd2 | 21 | 31 | 3353 | 1 | 314.8  |
| 612 | 5_WT.nd2 | 21 | 32 | 3719 | 1 | 310.76 |
| 613 | 5_WT.nd2 | 21 | 33 | 3560 | 1 | 313.06 |
| 614 | 5_WT.nd2 | 21 | 34 | 4847 | 2 | 320.36 |
| 615 | 5_WT.nd2 | 21 | 35 | 3804 | 1 | 325.12 |
| 616 | 5_WT.nd2 | 21 | 36 | 3642 | 1 | 32.98  |
| 617 | 5_WT.nd2 | 21 | 37 | 3637 | 1 | 43.42  |
| 618 | 5_WT.nd2 | 21 | 38 | 3472 | 1 | 334.25 |
| 619 | 5_WT.nd2 | 21 | 39 | 3629 | 1 | 53.54  |
| 620 | 5_WT.nd2 | 21 | 40 | 3061 | 1 | 351.41 |
| 621 | 5_WT.nd2 | 21 | 41 | 3480 | 1 | 43.01  |
| 622 | 5_WT.nd2 | 21 | 42 | 3214 | 1 | 350.97 |
| 623 | 5_WT.nd2 | 21 | 43 | 3648 | 1 | 46.1   |
| 624 | 5_WT.nd2 | 21 | 44 | 3267 | 1 | 68.96  |
| 625 | 5_WT.nd2 | 21 | 45 | 3149 | 1 | 362.79 |
| 626 | 5_WT.nd2 | 21 | 46 | 3281 | 1 | 49.4   |
| 627 | 5_WT.nd2 | 21 | 47 | 3159 | 1 | 65.52  |
| 628 | 5_WT.nd2 | 21 | 48 | 3290 | 1 | 220.63 |
| 629 | 5_WT.nd2 | 21 | 49 | 2539 | 1 | 519.83 |
| 630 | 5_WT.nd2 | 21 | 50 | 2884 | 1 | 103.59 |
| 631 | 5_WT.nd2 | 22 | 1  | 3071 | 1 | 36     |
| 632 | 5_WT.nd2 | 22 | 2  | 2818 | 1 | 134.63 |
| 633 | 5_WT.nd2 | 22 | 3  | 3907 | 1 | 97.62  |
| 634 | 5_WT.nd2 | 22 | 4  | 3112 | 1 | 116.97 |
| 635 | 5_WT.nd2 | 22 | 5  | 3165 | 1 | 164.75 |
| 636 | 5_WT.nd2 | 22 | 6  | 3883 | 1 | 177.08 |
| 637 | 5_WT.nd2 | 22 | 7  | 3157 | 1 | 60     |
| 638 | 5_WT.nd2 | 22 | 8  | 3525 | 1 | 14     |
| 639 | 5_WT.nd2 | 22 | 9  | 3882 | 1 | 1      |
| 640 | 5_WT.nd2 | 22 | 10 | 4539 | 2 | 1.41   |
| 641 | 5_WT.nd2 | 22 | 11 | 3557 | 1 | 5      |
| 642 | 5_WT.nd2 | 22 | 12 | 3313 | 1 | 0      |
| 643 | 5_WT.nd2 | 22 | 13 | 3778 | 1 | 40.8   |
| 644 | 5_WT.nd2 | 22 | 14 | 3169 | 1 | 12.81  |
| 645 | 5_WT.nd2 | 22 | 15 | 3402 | 1 | 0      |
| 646 | 5_WT.nd2 | 22 | 16 | 3282 | 1 | 241.07 |
| 647 | 5_WT.nd2 | 22 | 17 | 2774 | 1 | 89     |
| 648 | 5_WT.nd2 | 22 | 18 | 4065 | 1 | 231    |
| 649 | 5_WT.nd2 | 22 | 19 | 5934 | 2 | 9      |
| 650 | 5_WT.nd2 | 22 | 20 | 4248 | 2 | 226    |

|     |          |    |    |      |   |        |
|-----|----------|----|----|------|---|--------|
| 651 | 5_WT.nd2 | 22 | 21 | 3800 | 1 | 214.15 |
| 652 | 5_WT.nd2 | 23 | 1  | 3000 | 1 | 33     |
| 653 | 5_WT.nd2 | 23 | 2  | 2955 | 1 | 46     |
| 654 | 5_WT.nd2 | 23 | 3  | 2621 | 1 | 26.83  |
| 655 | 5_WT.nd2 | 23 | 4  | 2767 | 1 | 94.05  |
| 656 | 5_WT.nd2 | 23 | 5  | 2646 | 1 | 128.27 |
| 657 | 5_WT.nd2 | 23 | 6  | 2826 | 1 | 72.8   |
| 658 | 5_WT.nd2 | 23 | 7  | 2801 | 1 | 59.94  |
| 659 | 5_WT.nd2 | 23 | 8  | 2909 | 1 | 88.26  |
| 660 | 5_WT.nd2 | 23 | 9  | 3144 | 1 | 41.11  |
| 661 | 5_WT.nd2 | 23 | 10 | 2729 | 1 | 47.01  |
| 662 | 5_WT.nd2 | 23 | 11 | 2849 | 1 | 44.38  |
| 663 | 5_WT.nd2 | 23 | 12 | 3046 | 1 | 43.74  |
| 664 | 5_WT.nd2 | 23 | 13 | 2727 | 1 | 78.41  |
| 665 | 5_WT.nd2 | 23 | 14 | 2915 | 1 | 130.59 |
| 666 | 5_WT.nd2 | 23 | 15 | 2970 | 1 | 55     |
| 667 | 5_WT.nd2 | 23 | 16 | 2832 | 1 | 55.47  |
| 668 | 5_WT.nd2 | 23 | 17 | 2745 | 1 | 372.25 |
| 669 | 5_WT.nd2 | 23 | 18 | 2799 | 1 | 105.38 |
| 670 | 5_WT.nd2 | 23 | 19 | 3312 | 1 | 59.55  |
| 671 | 5_WT.nd2 | 23 | 20 | 2789 | 1 | 71.42  |
| 672 | 5_WT.nd2 | 23 | 21 | 2904 | 1 | 84.29  |
| 673 | 5_WT.nd2 | 23 | 22 | 3382 | 1 | 67.12  |
| 674 | 5_WT.nd2 | 23 | 23 | 2684 | 1 | 97.58  |
| 675 | 5_WT.nd2 | 23 | 24 | 3015 | 1 | 129.96 |
| 676 | 5_WT.nd2 | 23 | 25 | 3127 | 1 | 75.18  |
| 677 | 5_WT.nd2 | 23 | 26 | 3576 | 1 | 123.42 |
| 678 | 5_WT.nd2 | 23 | 27 | 3035 | 1 | 106.3  |
| 679 | 5_WT.nd2 | 23 | 28 | 2877 | 1 | 83.24  |
| 680 | 5_WT.nd2 | 23 | 29 | 2926 | 1 | 120.81 |
| 681 | 5_WT.nd2 | 23 | 30 | 3390 | 1 | 95.41  |
| 682 | 5_WT.nd2 | 23 | 31 | 3204 | 1 | 86.38  |
| 683 | 5_WT.nd2 | 23 | 32 | 3009 | 1 | 94.83  |
| 684 | 5_WT.nd2 | 23 | 33 | 2882 | 1 | 115.38 |
| 685 | 5_WT.nd2 | 23 | 34 | 3731 | 1 | 126.46 |
| 686 | 5_WT.nd2 | 23 | 35 | 3126 | 1 | 132.2  |
| 687 | 5_WT.nd2 | 23 | 36 | 3608 | 1 | 141.51 |
| 688 | 5_WT.nd2 | 23 | 37 | 3214 | 1 | 120    |
| 689 | 5_WT.nd2 | 23 | 38 | 3122 | 1 | 164.69 |
| 690 | 5_WT.nd2 | 23 | 39 | 2906 | 1 | 153.21 |
| 691 | 5_WT.nd2 | 23 | 40 | 3379 | 1 | 179.79 |
| 692 | 5_WT.nd2 | 23 | 41 | 2892 | 1 | 192.63 |
| 693 | 5_WT.nd2 | 23 | 42 | 2475 | 1 | 366.07 |

|     |          |    |    |      |   |        |
|-----|----------|----|----|------|---|--------|
| 694 | 5_WT.nd2 | 23 | 43 | 3017 | 1 | 47.51  |
| 695 | 5_WT.nd2 | 23 | 44 | 3099 | 1 | 40.16  |
| 696 | 5_WT.nd2 | 23 | 45 | 3213 | 1 | 28     |
| 697 | 5_WT.nd2 | 23 | 46 | 3491 | 1 | 31.32  |
| 698 | 5_WT.nd2 | 23 | 47 | 3245 | 1 | 20.62  |
| 699 | 5_WT.nd2 | 23 | 48 | 3126 | 1 | 22.67  |
| 700 | 5_WT.nd2 | 23 | 49 | 3761 | 1 | 32.02  |
| 701 | 5_WT.nd2 | 23 | 50 | 4641 | 2 | 11     |
| 702 | 5_WT.nd2 | 23 | 51 | 3613 | 1 | 14.32  |
| 703 | 5_WT.nd2 | 23 | 52 | 3266 | 1 | 26.17  |
| 704 | 5_WT.nd2 | 23 | 53 | 3514 | 1 | 31.76  |
| 705 | 5_WT.nd2 | 23 | 54 | 3369 | 1 | 22     |
| 706 | 5_WT.nd2 | 23 | 55 | 2966 | 1 | 24.6   |
| 707 | 5_WT.nd2 | 23 | 56 | 4296 | 2 | 13     |
| 708 | 5_WT.nd2 | 23 | 57 | 2923 | 1 | 7.07   |
| 709 | 5_WT.nd2 | 23 | 58 | 2662 | 1 | 225.08 |
| 710 | 5_WT.nd2 | 23 | 59 | 2824 | 1 | 1      |
| 711 | 5_WT.nd2 | 23 | 60 | 3089 | 1 | 222    |
| 712 | 5_WT.nd2 | 23 | 61 | 3700 | 1 | 3      |
| 713 | 5_WT.nd2 | 23 | 62 | 4708 | 2 | 8.06   |
| 714 | 5_WT.nd2 | 23 | 63 | 3153 | 1 | 214    |
| 715 | 5_WT.nd2 | 23 | 64 | 3220 | 1 | 221.38 |
| 716 | 5_WT.nd2 | 23 | 65 | 3297 | 1 | 205.16 |
| 717 | 5_WT.nd2 | 23 | 66 | 2848 | 1 | 250.24 |
| 718 | 5_WT.nd2 | 23 | 67 | 3103 | 1 | 231.55 |
| 719 | 5_WT.nd2 | 24 | 1  | 2740 | 1 | 99.54  |
| 720 | 5_WT.nd2 | 24 | 2  | 2742 | 1 | 16     |
| 721 | 5_WT.nd2 | 24 | 3  | 2769 | 1 | 12.04  |
| 722 | 5_WT.nd2 | 24 | 4  | 3821 | 1 | 14.14  |
| 723 | 5_WT.nd2 | 24 | 5  | 3323 | 1 | 26     |
| 724 | 5_WT.nd2 | 24 | 6  | 3879 | 1 | 10.05  |
| 725 | 5_WT.nd2 | 24 | 7  | 3314 | 1 | 31.32  |
| 726 | 5_WT.nd2 | 24 | 8  | 4886 | 2 | 6      |
| 727 | 5_WT.nd2 | 24 | 9  | 3644 | 1 | 2      |
| 728 | 5_WT.nd2 | 24 | 10 | 3873 | 1 | 3      |
| 729 | 5_WT.nd2 | 24 | 11 | 4691 | 2 | 8.25   |
| 730 | 5_WT.nd2 | 24 | 12 | 4265 | 2 | 12.08  |
| 731 | 5_WT.nd2 | 24 | 13 | 4220 | 1 | 21.19  |
| 732 | 5_WT.nd2 | 24 | 14 | 3337 | 1 | 31     |
| 733 | 5_WT.nd2 | 24 | 15 | 2911 | 1 | 37     |
| 734 | 5_WT.nd2 | 24 | 16 | 3207 | 1 | 50     |
| 735 | 5_WT.nd2 | 24 | 17 | 3670 | 1 | 40.26  |
| 736 | 5_WT.nd2 | 24 | 18 | 3403 | 1 | 152.05 |

|     |          |    |    |      |   |        |
|-----|----------|----|----|------|---|--------|
| 737 | 5_WT.nd2 | 24 | 19 | 3100 | 1 | 307.61 |
| 738 | 5_WT.nd2 | 24 | 20 | 2743 | 1 | 295.92 |
| 739 | 5_WT.nd2 | 24 | 21 | 2557 | 1 | 304.84 |
| 740 | 5_WT.nd2 | 24 | 22 | 3161 | 1 | 110.89 |
| 741 | 5_WT.nd2 | 24 | 23 | 2944 | 1 | 147.92 |
| 742 | 5_WT.nd2 | 24 | 24 | 2987 | 1 | 204.43 |
| 743 | 5_WT.nd2 | 24 | 25 | 3147 | 1 | 184.45 |
| 744 | 5_WT.nd2 | 24 | 26 | 3710 | 1 | 5.39   |
| 745 | 5_WT.nd2 | 24 | 27 | 2967 | 1 | 0      |
| 746 | 5_WT.nd2 | 24 | 28 | 3390 | 1 | 0      |
| 747 | 5_WT.nd2 | 24 | 29 | 3183 | 1 | 22.56  |
| 748 | 5_WT.nd2 | 24 | 30 | 3676 | 1 | 14.56  |
| 749 | 5_WT.nd2 | 24 | 31 | 2972 | 1 | 5.83   |
| 750 | 5_WT.nd2 | 24 | 32 | 3601 | 1 | 1      |
| 751 | 5_WT.nd2 | 24 | 33 | 4242 | 2 | 0      |
| 752 | 5_WT.nd2 | 24 | 34 | 4960 | 2 | 0      |
| 753 | 5_WT.nd2 | 24 | 35 | 3892 | 1 | 3.61   |
| 754 | 5_WT.nd2 | 24 | 36 | 3929 | 1 | 13.45  |
| 755 | 5_WT.nd2 | 24 | 37 | 3776 | 1 | 6      |
| 756 | 5_WT.nd2 | 24 | 38 | 3897 | 1 | 20.52  |
| 757 | 5_WT.nd2 | 24 | 39 | 3846 | 1 | 21.63  |
| 758 | 5_WT.nd2 | 24 | 40 | 3458 | 1 | 27.66  |
| 759 | 5_WT.nd2 | 24 | 41 | 3306 | 1 | 36.4   |
| 760 | 5_WT.nd2 | 24 | 42 | 3820 | 1 | 15     |
| 761 | 5_WT.nd2 | 24 | 43 | 4340 | 2 | 26     |
| 762 | 5_WT.nd2 | 24 | 44 | 3703 | 1 | 76.4   |
| 763 | 5_WT.nd2 | 24 | 45 | 3329 | 1 | 46.32  |
| 764 | 5_WT.nd2 | 24 | 46 | 4585 | 2 | 34.23  |
| 765 | 5_WT.nd2 | 24 | 47 | 4347 | 2 | 26.87  |
| 766 | 5_WT.nd2 | 24 | 48 | 3126 | 1 | 20.88  |
| 767 | 5_WT.nd2 | 24 | 49 | 4417 | 2 | 1.41   |
| 768 | 5_WT.nd2 | 24 | 50 | 3853 | 1 | 8.94   |
| 769 | 5_WT.nd2 | 24 | 51 | 4926 | 2 | 50.96  |
| 770 | 5_WT.nd2 | 24 | 52 | 4549 | 2 | 7.81   |
| 771 | 5_WT.nd2 | 24 | 53 | 4594 | 2 | 62.51  |
| 772 | 5_WT.nd2 | 24 | 54 | 3767 | 1 | 65.12  |
| 773 | 5_WT.nd2 | 24 | 55 | 3476 | 1 | 8      |
| 774 | 5_WT.nd2 | 24 | 56 | 4168 | 1 | 57     |
| 775 | 5_WT.nd2 | 24 | 57 | 4462 | 2 | 45.35  |
| 776 | 5_WT.nd2 | 24 | 58 | 3704 | 1 | 26     |
| 777 | 5_WT.nd2 | 24 | 59 | 3981 | 1 | 64     |
| 778 | 5_WT.nd2 | 24 | 60 | 3477 | 1 | 32     |
| 779 | 5_WT.nd2 | 24 | 61 | 5426 | 2 | 10.3   |

|     |          |    |    |      |   |        |
|-----|----------|----|----|------|---|--------|
| 780 | 5_WT.nd2 | 24 | 62 | 4133 | 1 | 42     |
| 781 | 5_WT.nd2 | 24 | 63 | 4239 | 2 | 40     |
| 782 | 5_WT.nd2 | 24 | 64 | 3480 | 1 | 60.13  |
| 783 | 5_WT.nd2 | 24 | 65 | 3910 | 1 | 0      |
| 784 | 5_WT.nd2 | 24 | 66 | 6605 | 2 | 4.24   |
| 785 | 5_WT.nd2 | 24 | 67 | 3497 | 1 | 53.15  |
| 786 | 5_WT.nd2 | 24 | 68 | 5928 | 2 | 0      |
| 787 | 5_WT.nd2 | 24 | 69 | 3835 | 1 | 0      |
| 788 | 5_WT.nd2 | 24 | 70 | 3469 | 1 | 56.01  |
| 789 | 5_WT.nd2 | 24 | 71 | 3655 | 1 | 0      |
| 790 | 5_WT.nd2 | 24 | 72 | 3413 | 1 | 54.15  |
| 791 | 5_WT.nd2 | 24 | 73 | 6705 | 2 | 14.42  |
| 792 | 5_WT.nd2 | 24 | 74 | 3113 | 1 | 367.97 |
| 793 | 5_WT.nd2 | 24 | 75 | 4538 | 2 | 242.67 |

Capsid>Nuc

Capsid Max Intensity

|       |                         |          |
|-------|-------------------------|----------|
| 0     |                         |          |
| 83.19 | Mean                    | 4369.909 |
| 77.39 | Standard Error          | 98.96758 |
| 0     | Median                  | 3331     |
| 0     | Mode                    | 2818     |
| 0     | Standard Deviation      | 6028.905 |
| 0     | Sample Variance         | 36347696 |
| 75    | Kurtosis                | 62.66648 |
| 95    | Skewness                | 7.67267  |
| 27.51 | Range                   | 66841    |
| 53.04 | Minimum                 | 2140     |
| 0     | Maximum                 | 68981    |
| 0     | Sum                     | 16216734 |
| 17.69 | Count                   | 3711     |
| 0     | Confidence Level(95.0%) | 194.0362 |

1

|       | Est #              | %    | Max # |    |
|-------|--------------------|------|-------|----|
| 7.81  | Cent Capsids       | 263  | 4.7%  | 15 |
| 62.65 | Nuc Capsids        | 3881 | 70.1% | 24 |
| 0     | Nuc capsids - cent | 3739 | 67.5% | 24 |
| 0     | Wayward Capsids    | 1536 | 27.7% | 14 |

15.81

13.04

30.87

Note: This combined data set of the three WT>WT repeats was used to

49.5

0



0  
0  
0  
9  
0  
0  
34.06  
0  
37.01  
0  
0  
60.03  
63.51  
0  
0  
0  
0  
0  
0  
0  
0  
0  
0  
0  
0  
0  
0  
0  
0  
0  
0  
0  
0  
0  
0  
36  
0  
48.17  
36.06  
40.8  
0  
34.79  
0  
0  
0  
0  
0

44.1  
0  
0  
0  
0  
47.76  
50.25  
106.51  
130.27  
113.72  
95  
0  
0  
0  
151.24  
45.22  
38.59  
32.53  
23.35  
12.65  
5.39  
1  
0  
0  
0  
0  
0  
0  
38.42  
0  
0  
208  
0  
143  
7.81  
0  
0  
0  
0  
267.82  
318  
0  
0  
148.57



3  
0  
0  
0  
0  
0  
0  
0  
0  
0  
0  
0  
0  
0  
0  
0  
0  
0  
0  
7.07  
0  
12.04  
0  
0  
0  
0  
15.81  
120.42  
0  
149.72  
103.95  
0  
132.5  
121.62  
116  
97.91  
0  
99.16  
99.49  
189.48  
87.73  
99.04  
108.93  
99.49  
38.9

106.1  
85.15  
132.94  
0  
150.62  
0  
0  
0  
211.46  
0  
0  
0  
0  
0  
0  
93.81  
92.57  
105.6  
0  
124.95  
118.61  
113  
100  
113.02  
0  
0  
0  
130  
0  
0  
0  
0  
0  
63.51  
0  
0  
0  
85  
171.97  
0  
65.19  
0  
0

0  
0  
0  
0  
0  
0  
0  
13.34  
0  
0  
15.3  
0  
0  
0  
0  
7.21  
0  
13.45  
0  
122.67  
40.5  
0  
123.33  
116.67  
20.62  
40.31  
107.56  
84.88  
1  
0  
0  
0  
0  
0  
0  
0  
179.87  
165.89  
158.09  
158.34  
141.68  
94.41  
38.83  
69

34.18

0  
0  
0  
0  
0  
0  
0  
0  
0

179.61

0  
0  
0  
0  
0

111.23

174.84

0

41.11

0  
0  
0  
0  
0

172.19

151.82

0  
0

139.71

178.99

162.36

0  
0  
0  
50  
0  
0  
0  
0  
0  
0  
0  
0

0  
0  
0  
90.25  
0  
0  
82.98  
0  
0  
62.8  
9  
0  
0  
2  
0  
0  
0  
0  
194.93  
23.09  
21.54  
0  
0  
0  
0  
42.43  
17  
1  
0  
15.3  
0  
0  
12  
0  
0  
0  
0  
0  
0  
0  
44.28  
0  
0  
0  
0



0  
0  
29  
15  
0  
0  
1.41  
0  
14  
0  
0  
0  
0  
0  
0  
0  
0  
0  
0  
0  
11.18  
0  
0  
59.03  
67.96  
46.07  
31.11  
24.04  
57.8  
73.76  
0  
70.71  
0  
0  
0  
0  
172.24  
162.86  
130.65  
33.24  
100.13  
9  
30.61

0  
0  
0  
0  
0  
0  
0  
2  
0  
0  
3  
17  
0  
175.64  
0  
0  
11  
0  
12.08  
167.94  
0  
164.18  
170.39  
11  
0  
0  
0  
55  
0  
0  
0  
7.62  
0  
0  
0  
0  
0  
49.2  
0  
87.92  
0  
0  
191.51

27.29  
0  
0  
0  
0  
0  
66  
7.62  
67.45  
0  
0  
51.92  
0  
45  
43  
183.22  
0  
51.86  
0  
190.52  
0  
204.79  
24.19  
24  
19  
0  
15  
12  
64.88  
0  
3  
23.35  
0  
0  
0  
0  
0  
0  
0  
0  
0  
0  
0  
0  
0

0  
0  
0  
0  
32  
28  
0  
4  
0  
0  
0  
0  
0  
0  
0  
0  
0  
0  
0  
0  
0  
0  
0  
0  
0  
0  
0  
1.41  
0  
0  
0  
0  
0  
0  
0  
0  
0  
0  
15.65  
0  
0  
11.31  
0  
0  
10.77  
115.21  
49.41  
79.2  
66.73  
61.91  
27.59  
15.81

9.22  
29.07  
28.64  
7  
0  
73.76  
2  
0  
359.12  
80.45  
67.54  
39  
144.9  
130.59  
173.81  
171.41  
162.36  
105  
0  
30.59  
182.66  
0  
54.71  
18.44  
186.68  
61  
42.43  
0  
34.79  
9.49  
0  
185.54  
214.79  
200  
209.5  
0  
20.12  
0  
0  
76.85  
0  
0  
72.62

0  
0  
84.29  
0  
7.62  
0  
0  
0  
42.95  
55.36  
21.93  
0  
0  
0  
0  
0  
0  
3.16  
0  
0  
0  
0  
6.4  
0  
2  
2  
13  
0  
0  
0  
57.28  
0  
0  
0  
0  
0  
0  
0  
52.2  
0  
0  
0  
0  
0  
74.63

68.07

0

79.08

36.88

69

0

0

0

0

0

0

0

0

0

0

0

0

16

26.17

43

0

0

0

0

0

0

17

13.6

0

0

0

0

0

0

0

153.52

0

0

0

0

0

0

0

0  
0  
0  
0  
0  
0  
0  
35  
33.24  
30.41  
53.34  
67.12  
238.17  
166.08  
51  
53.34  
40.36  
28.02  
88  
78.16  
69.46  
30.81  
81.88  
36.24  
74.95  
75.61  
68.43  
64.47  
62.18  
0  
26  
61.29  
40.5  
59.2  
57.49  
32  
37.16  
56.57  
0  
0  
55.9  
58  
50.09





0  
0  
0  
0  
0  
0  
0  
0  
0  
1.41  
0  
1.41  
0  
0  
0  
0  
0  
0  
0  
0  
0  
0  
0  
0  
0  
12  
10  
21.93  
17.46  
100.5  
54  
0  
62.17  
66.12  
70  
166.81  
168.32  
157.11  
161.21  
169.5  
159.2  
152.82  
151.09  
151.18  
152.95

180.31  
156.26  
196.77  
160.08  
163.98  
167.3  
191.97  
182.46  
191.47  
171.4  
177.79  
179.23  
191.23  
163.98  
188.94  
185.81  
183.5  
187.77  
161.53  
152.8  
180.76  
172.04  
177.16  
165.48  
0  
0  
0  
156.59  
0  
0  
0  
0  
162.15  
126.15  
0  
1  
0  
0  
53.6  
0  
0  
0  
0

0  
0  
46.65  
0  
0  
38.18  
0  
0  
0  
0  
3  
21  
0  
17.03  
12.04  
0  
0  
37.16  
39.85  
0  
0  
0  
0  
3.61  
0  
121.26  
132.19  
0  
0  
138  
0  
0  
0  
157  
0  
77  
195  
0  
118  
173  
189  
183  
0

161  
0  
39  
195  
206  
0  
200  
111  
189  
0  
22.2  
15  
174.05  
183  
76  
192  
199  
184  
205.12  
0  
0  
157.05  
194.06  
169.5  
190.09  
175.1  
0  
23.41  
196.43  
0  
182.7  
205.2  
0  
194.14  
0  
0  
0  
129.65  
0  
0  
0  
0  
0

0  
0  
0  
0  
0  
0  
0  
162.24  
14  
0  
140.62  
151.6  
178.49  
96.17  
132.22  
113.05  
36.8  
147.71  
56.46  
65.8  
71  
73.98  
114.21  
75.66  
76.24  
377.58  
279.58  
314.61  
272.62  
287.34  
97.2  
25.94  
0  
0  
0  
74.09  
68.43  
51.26  
58.59  
0  
0  
0  
56.04

0  
0  
0  
43.42  
0  
43.57  
41.34  
41.87  
38.21  
32.2  
26.87  
17.26  
7.62  
0  
0  
0  
0  
0  
0  
0  
0  
0  
11.18  
0  
0  
0  
25  
32.06  
39.81  
39  
0  
0  
44.91  
46  
0  
0  
0  
0  
0  
0  
0  
0  
0  
0  
0





81.27  
0  
0  
0  
0  
75.5  
0  
0  
0  
0  
107.56  
86.61  
0  
0  
0  
0  
59.48  
4.12  
0  
0  
14.87  
39.46  
28.43  
84  
48.08  
92.44  
22  
81.3  
59.17  
17.46  
91.79  
0  
0  
104.81  
0  
0  
0  
0  
0  
0  
0  
0  
0  
0







144.84

0

0

0

0

0

0

0

0

0

0

0

40.26

16.64

85.44

70.21

6

93.13

78.39

122.33

76.92

100.45

19

20.59

17.2

89.55

81.93

94.58

0

1

0

25.08

102.96

0

0

0

0

0

0

0

0

0

0

0  
2.24  
0  
0  
10.2  
206.89  
194.14  
0  
0  
203.93  
130.48  
196.79  
182.95  
0  
0  
0  
171.29  
0  
100.4  
0  
156.11  
87.73  
93.86  
64.2  
0  
0  
0  
0  
0  
0  
43.1  
0  
24.6  
12.08  
0  
0  
17.2  
10.44  
100.04  
23  
0  
0  
0

0  
0  
157.01  
0  
82.62  
177.54  
98.72  
173.77  
168.43  
168.07  
112.61  
160.6  
74  
45.45  
48.92  
48.83  
50.77  
65.8  
20  
0  
49.5  
15.03  
15.65  
0  
0  
0  
0  
0  
0  
0  
0  
0  
0  
0  
0  
0  
0  
0  
0  
0  
33.96  
0  
0  
76.4  
0  
4.12  
0

0  
0  
0  
0  
0  
0  
0  
0  
0  
0  
0  
0  
0  
0  
0  
0  
101.83  
0  
0  
0  
98.03  
92  
91.92  
0  
0  
0  
0  
85.15  
73  
0  
0  
0  
64.03  
0  
0  
0  
0  
0  
0  
0  
46.1  
0  
0  
44.6  
0



18.03  
0  
0  
0  
105.72  
126.44  
0  
28.64  
0  
0  
11.05  
0  
0  
0  
0  
12  
0  
0  
0  
0  
0  
0  
0  
84  
25  
0  
2.24  
8.49  
0  
27.89  
0  
22.14  
0  
23.26  
0  
0  
34.66  
30  
13.34  
0  
0  
0  
0  
3.16









178.62  
0  
204.08  
0  
0  
0  
74.15  
11  
173  
0  
0  
0  
0  
0  
0  
0  
83.6  
0  
0  
0  
0  
0  
0  
0  
179.21  
125.17  
115  
115.92  
108  
109.17  
109.55  
126.78  
56.57  
78.26  
94  
57.56  
33.84  
37.58  
0  
46.4  
0  
0

0  
0  
0  
16.12  
0  
111.32  
0  
0  
0  
0  
0  
0  
0  
0  
0  
0  
0  
0  
8  
0  
0  
0  
0  
0  
0  
0  
0  
0  
0  
0  
0  
0  
0  
0  
23.77  
0  
0  
0  
0  
0  
0  
0  
9.85  
0  
0  
0  
0  
0  
0  
0  
0  
0  
0

0  
0  
0  
0  
0  
0  
0  
0  
0  
0  
0  
0  
0  
0  
0  
45.1  
0  
45.71  
0  
0  
0  
0  
0  
0  
22.63  
33.42  
0  
0  
21  
0  
0  
32.8  
0  
48.8  
35  
65.3  
24  
109.66  
59.36  
80.65  
60.03  
55.79  
63.07  
156  
99.86



197.25  
63.13  
125.92  
181.47  
124.42  
127.13  
137.28  
152.31  
128.81  
204.27  
141  
143  
145.09  
150.96  
196.43  
158.14  
166.77  
204.2  
221.78  
155.54  
138.23  
142.06  
141.9  
227.56  
207.94  
215.19  
225.97  
216.3  
230.63  
231.22  
230.59  
233.62  
234.62  
210.6  
0  
0  
0  
0  
0  
0  
0  
0  
0  
0

0  
0  
0  
0  
0  
29.02  
29.02  
0  
0  
0  
57.57  
0  
0  
68.54  
7.21  
0  
3.61  
0  
0  
0  
67.98  
0  
0  
75.13  
43.08  
42.72  
64.07  
0  
43.14  
64.13  
44.29  
60.37  
61.07  
47.54  
72.67  
2  
50.21  
53.04  
47.8  
244.77  
34.06  
43.28  
43.6

262.07  
257.66  
246.03  
44.29  
243  
52.77  
45  
276.38  
0  
56  
48.37  
285.32  
0  
42  
88.96  
308.97  
298.74  
0  
285.73  
312.41  
325.83  
332.1  
365.03  
356.44  
344.57  
338.04  
272.24  
7.81  
1  
293.16  
28  
367.01  
2  
30.41  
0  
351.44  
0  
0  
351.81  
352.24  
0  
4  
465.98

45.88  
454.33  
466.64  
472.48  
63.07  
29.7  
120.3  
0  
0  
25.46  
0  
0  
0  
0  
0  
0  
0  
0  
0  
0  
0  
0  
6.4  
14.56  
9.85  
1.41  
26.08  
24.7  
0  
0  
20.59  
0  
43.01  
14.87  
1  
53.23  
1  
63.06  
31  
0  
0  
0  
0  
0

0  
0  
0  
0  
0  
0  
0  
0  
0  
0  
0  
25  
0  
29.15  
29.07  
0  
0  
0  
57.57  
0  
0  
67.98  
7.62  
0  
3.61  
0  
0  
0  
0  
0  
79.76  
204.22  
0  
215.13  
243.02  
0  
88.32  
224.9  
94.3  
235.91  
248.76  
255.52  
279.12

246.68  
2  
113.7  
0  
258.12  
264.46  
0  
0  
0  
269.7  
0  
122.35  
135.88  
0  
0  
0  
276.93  
119.4  
19  
0  
191.17  
0  
0  
13.42  
69.08  
64.85  
18.68  
28.32  
57.38  
48.3  
43.28  
98.23  
113.72  
0  
0  
0  
0  
0  
0  
0  
0  
0  
0  
0

0  
0  
0  
0  
0  
0  
0  
0  
14.87  
0  
14.21  
0  
16.97  
23.85  
0  
0  
25.08  
0  
40  
0  
0  
0  
0  
33.29  
0  
0  
0  
3.61  
0  
0  
0  
9.9  
0  
0  
5  
0  
0  
0  
0  
17.69  
0  
0  
0

0  
0  
0  
0  
0  
0  
0  
0  
0  
0  
0  
0  
0  
0  
0  
0  
0  
0  
17  
10  
0  
0  
0  
0  
0  
0  
0  
0  
1.41  
21.21  
36.89  
27.66  
0  
10.3  
23.77  
42.72  
2.24  
36.36  
38.12  
22  
4  
22  
3.16  
5  
11.4  
0  
0



0  
0  
0  
59  
0  
0  
62.51  
46.39  
0  
0  
0  
0  
0  
0  
0  
56.36  
0  
0  
34.99  
13.15  
14.56  
0  
0  
0  
0  
79.83  
69.03  
63.39  
54.42  
50.57  
172.41  
48.37  
0  
0  
0  
2.24  
0  
4.47  
2.83  
0  
0  
0  
13.45



0  
0  
0  
0  
0  
0  
0  
0  
21.93  
0  
0  
0  
0  
0  
0  
0  
0  
29.83  
0  
0  
0  
0  
0  
11  
34  
22  
0  
0  
0  
2.83  
0  
0  
0  
0  
0  
0  
29.41  
6.71  
0  
13.15  
20.22  
30.27  
29.61  
0  
44.18

32.25

0

0

0

0

0

0

0

0

22

0

0

0

0

0

0

0

0

21.63

18.44

8.49

4.12

30.41

25.94

44.41

174.63

56.3

45.54

62.39

0

54.08

171.28

56.92

0

0

0

0

34.06

0

0

0

0

0

0  
0  
0  
0  
0  
0  
0  
0  
37.48  
266.26  
14.32  
0  
0  
307.18  
0  
0  
6.32  
8  
14.56  
28.23  
16.28  
25.61  
0  
0  
0  
0  
0  
0  
26.4  
0  
0  
0  
0  
0  
79.56  
0  
22.56  
13  
0  
17.09  
0  
0  
0

89  
0  
0  
247.95  
37  
0  
0  
0  
36.35  
0  
0  
74.15  
0  
0  
0  
0  
0  
72.84  
0  
13.15  
94.09  
25.08  
5  
12  
31.06  
3.61  
0  
0  
0  
0  
0  
113  
0  
0  
0  
0  
0  
0  
0  
0  
0  
375  
256  
273



0  
0  
0  
0  
0  
0  
0  
0  
0  
0  
9.22  
0  
0  
63.06  
0  
0  
0  
71.84  
79.92  
0  
0  
0  
0  
79.65  
0  
0  
0  
175.79  
187.67  
152.4  
113.03  
142.02  
5  
85.99  
0  
98.62  
51.92  
2.24  
125.1  
150.56  
0  
0  
44



161.11  
137.03  
0  
150  
157.05  
68  
132  
11.05  
144  
151.01  
165  
59  
0  
35  
105.93  
0  
171.66  
4  
103.16  
118.36  
0  
0  
0  
0  
177.72  
0  
0  
73  
0  
0  
0  
0  
183.13  
0  
58.69  
0  
0  
0  
21  
0  
0  
16.76  
0

184.32  
18.38  
51  
0  
0  
21  
187.11  
0  
0  
0  
0  
0  
0  
0  
0  
0  
64.63  
72.44  
0  
0  
185.3  
0  
159.38  
0  
49.04  
0  
1  
0  
0  
0  
0  
179.77  
0  
170.31  
0  
0  
127.4  
0  
163.81  
127.06  
21.1  
137.28  
45.18

0  
162.86  
21.21  
8.54  
0  
119.77  
0  
46.49  
7.28  
69.34  
62.1  
62.2  
0  
64.78  
65  
67  
70  
0  
75  
76.42  
78  
42.38  
0  
6  
0  
0  
3  
0  
24.19  
0  
2  
0  
0  
0  
4.24  
0  
0  
2.24  
16  
75.18  
25.55  
27.51  
0

21.4

28.28

0

17.46

0

0

0

0

0

0

0

0

0

0

0

0

0

0

20

0

0

0

0

0

39.36

0

0

0

0

0

6

0

0

0

0

0

0

0

0

0

0

203.16

0

0  
0  
0  
51  
0  
0  
0  
0  
0  
0  
0  
0  
0  
0  
0  
0  
123.76  
1.41  
292.14  
285.91  
24  
0  
24.04  
321.22  
0  
0  
253  
267  
0  
0  
0  
0  
0  
0  
0  
0  
76.49  
0  
4.12  
0  
294.39  
18.36  
0  
0  
0

0  
0  
0  
0  
0  
0  
0  
0  
0  
0  
284.43  
0  
0  
273.07  
2.83  
0  
0  
0  
0  
252.12  
0  
232.43  
226.88  
0  
0  
0  
0  
0  
0  
61.4  
61.29  
0  
64.03  
4  
66  
68  
29  
69  
0  
72  
76.06  
78  
82

38.28

0

0

4

0

0

0

0

84.72

0

0

0

29.41

0

13.34

23.71

98

64.66

0

0

0

0

0

0

0

0

0

93

0

0

0

4

0

0

0

0

0

0

9

0

0

6.32

0







402.41  
412.66  
418.85  
376.55  
416.17  
414.13  
426.41  
419.36  
431.59  
0  
0  
0  
0  
0  
0  
0  
0  
0  
0  
48.84  
52.92  
18.79  
32.56  
45.54  
49.73  
0  
51.55  
53.15  
55.23  
0  
0  
54.41  
0  
0  
0  
0  
10.77  
0  
0  
0  
0  
0  
0  
0

0  
0  
27.86  
0  
0  
0  
11.66  
0  
0  
0  
0  
0  
0  
0  
0  
0  
0  
0  
4  
0  
0  
0  
25.32  
0  
0  
0  
0  
37.64  
407.59  
368.13  
362.55  
390.41  
384.98  
403.27  
465.31  
420.84  
432.22  
440.82  
20.22  
15.65  
0  
113.44  
23.35

0  
0  
0  
0  
114.49  
0  
22.63  
0  
28.02  
0  
34.41  
11.4  
0  
0  
4.24  
0  
0  
0  
0  
3.61  
13  
0  
0  
0  
0  
25.96  
0  
7  
18  
10  
2.24  
0  
56  
0  
0  
0  
50.09  
0  
68.41  
18.25  
0  
16  
0

0  
0  
0  
0  
18.79  
0  
0  
1.41  
0  
0  
0  
0  
0  
0  
0  
0  
0  
0  
0  
0  
4.12  
0  
0  
90.92  
72.84  
0  
22  
0  
0  
0  
0  
0  
0  
0  
0  
0  
0  
0  
0  
15  
0  
78.49  
0  
0  
0  
29.97

0  
0  
0  
42  
0  
0  
0  
0  
0  
53.14  
0  
0  
0  
29.53  
0  
0  
0  
0  
0  
0  
77.52  
0  
0  
0  
0  
0  
0  
0  
49.04  
23.09  
53.85  
0  
0  
0  
0  
0  
0  
0  
0  
0  
0  
0  
11.4

0  
0  
0  
0  
0  
0  
0  
0  
0  
0  
0  
0  
9.43  
2  
23.35  
28.86  
99.86  
7.81  
0  
0  
0  
0  
0  
0  
0  
13  
0  
0  
31.14  
0  
0  
0  
0  
0  
0  
0  
0  
0  
72  
0  
0  
0  
0  
0  
0  
106.62

24.33  
70.11  
75.43  
55.44  
81.61  
78  
0  
0  
0  
0  
326.92  
0  
335.2  
0  
13.93  
0  
0  
0  
0  
0  
0  
0  
0  
0  
0  
0  
0  
40.61  
0  
0  
0  
0  
0  
50.16  
64.35  
29.55  
19.24  
16  
10  
4.47  
50.22  
0  
0  
51.61



0  
0  
0  
0  
36.4  
0  
20  
49  
3.61  
0  
20.12  
0  
15  
0  
0  
0  
0  
0  
0  
0  
27.46  
41.87  
20  
51.04  
0  
52.2  
0  
0  
0  
73.55  
130  
0  
0  
0  
0  
28  
35.34  
0  
0  
0  
0  
0  
0  
0



0  
50.25  
0  
0  
0  
0  
0  
0  
0  
0  
0  
0  
0  
0  
446.37  
70.35  
0  
0  
0  
0  
0  
0  
0  
0  
0  
0  
0  
0  
0  
0  
0  
0  
0  
0  
13.42  
0  
25.94  
0  
0  
0  
20.88  
43.74  
0  
0  
68.26

0  
58  
0  
0  
0  
0  
0  
0  
0  
0  
48  
221.84  
3  
4  
0  
291.36  
289.97  
7.21  
67.9  
91.05  
56.61  
50.04  
41.77  
65.07  
33.24  
26.17  
26  
22  
25.3  
22.8  
21.1  
23.41  
11  
0  
4  
0  
0  
0  
0  
0  
0  
0  
0  
0







0  
0  
0  
0  
0  
152  
0  
167  
0  
0  
0  
169.07  
0  
0  
158.15  
130.31  
0  
183.7  
0  
0  
26.17  
0  
0  
184.2  
149.28  
178.54  
43.42  
64.66  
127.44  
131.05  
113.85  
135.76  
125.73  
144.96  
149.91  
0  
45.28  
0  
0  
0  
0  
18  
52.35





0  
0  
13.89  
0  
0  
0  
0  
0  
1  
0  
0  
0  
3  
2  
0  
0  
0  
0  
0  
0  
72.11  
187.88  
1  
0  
0  
0  
0  
0  
0  
0  
0  
2  
0  
13.15  
0  
326.38  
0  
0  
0  
0  
0  
18.97  
0

0  
0  
0  
0  
2  
0  
0  
0  
0  
0  
0  
0  
0  
0  
0  
0  
0  
0  
0  
0

183.63

0  
0  
0  
0  
0  
0  
0  
0  
0  
0  
0  
0  
0  
0  
0  
0  
0  
0

2.24

0  
0  
166  
0  
0  
0  
0  
0  
0  
0  
0  
0

309.26



45.04

37

34

0

0

12.37

24

0

15

8

0

0

29.21

0

0

0

0

0

7.28

0

29.12

0

0

0

0

0

0

0

0

0

10.44

0

0

0

0

0

0

0

0

0

0

0

0  
0  
0  
0  
0  
0  
0  
0  
0  
0  
0  
0

11

390.39

200.8

o compute the mode of the capsid sum intensities
